# Supplementary material for: Recurrent GNAQ mutation encoding T96S in natural killer/T cell lymphoma
Source: PubMed Central journal article supplement (PMC6746819; doi:10.1038/s41467-019-12032-9), 2019-09-16
Supplement: 41467_2019_12032_MOESM1_ESM.pdf [file 41467_2019_12032_MOESM1_ESM.pdf]

## Supplementary information

### Recurrent *GNAQ* mutation encoding T96S in natural killer/T cell lymphoma

Li et al

#### Table of Contents

##### 1. Supplementary Figures

|                            |    |
|----------------------------|----|
| Supplementary Fig. 1.....  | 3  |
| Supplementary Fig. 2.....  | 4  |
| Supplementary Fig. 3.....  | 5  |
| Supplementary Fig. 4.....  | 6  |
| Supplementary Fig. 5.....  | 7  |
| Supplementary Fig. 6.....  | 8  |
| Supplementary Fig. 7.....  | 9  |
| Supplementary Fig. 8.....  | 12 |
| Supplementary Fig. 9.....  | 13 |
| Supplementary Fig. 10..... | 14 |

##### 2. Supplementary Tables

|                            |    |
|----------------------------|----|
| Supplementary Table 1..... | 15 |
| Supplementary Table 2..... | 19 |
| Supplementary Table 3..... | 21 |
| Supplementary Table 4..... | 55 |
| Supplementary Table 5..... | 58 |

|                             |     |
|-----------------------------|-----|
| Supplementary Table 6.....  | 60  |
| Supplementary Table 7.....  | 64  |
| Supplementary Table 8.....  | 70  |
| Supplementary Table 9.....  | 105 |
| Supplementary Table 10..... | 106 |
| Supplementary Table 11..... | 107 |
| Supplementary Table 12..... | 109 |
| Supplementary Table 13..... | 110 |
| Supplementary Table 14..... | 111 |
| Supplementary Table 15..... | 115 |



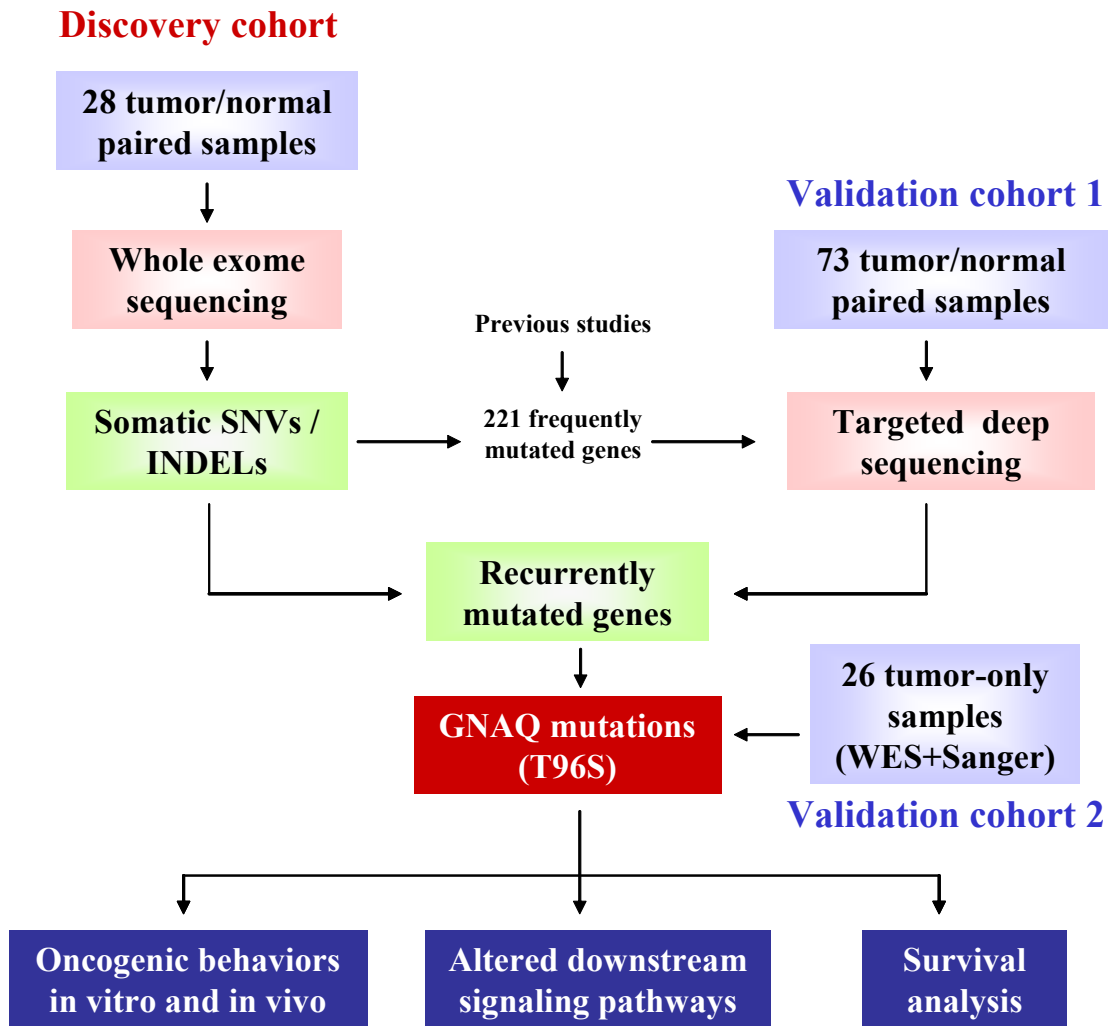

**Supplementary Fig. 1** Experimental design. A combination of whole-exome sequencing (n=28) and targeted deep sequencing (n=73) was performed on a total of 101 NKTCL pairs. The recurrently mutated *GNAQ* T96S mutations were identified, and these mutations were further validated in a cohort of 26 NKTCL samples without matched normal tissue. Functional studies of *GNAQ* (wild-type and mutants) were performed, and the altered downstream signaling pathways were examined. Moreover the associations between *GNAQ* T96S mutations and prognosis were assessed.

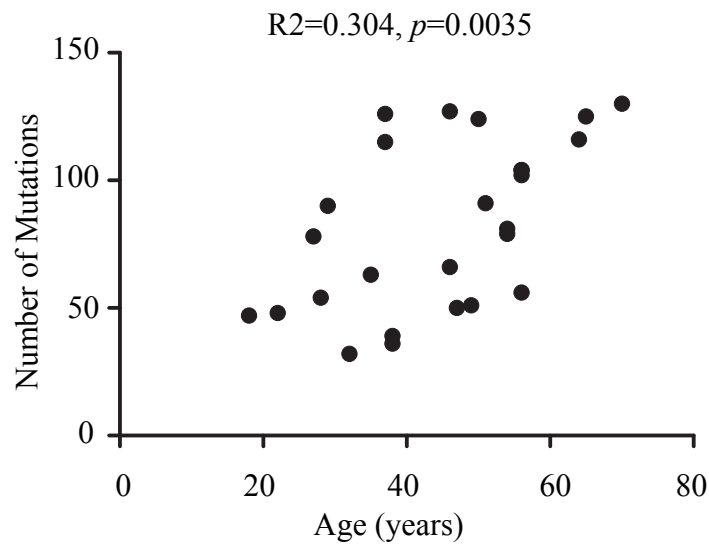

**Supplementary Fig. 2** The correlation of somatic nonsilent mutation burden and age in NKTCL patients ( $R^2=0.295$ ,  $p=0.004$ ) after excluding the two patients with more than 200 mutations.

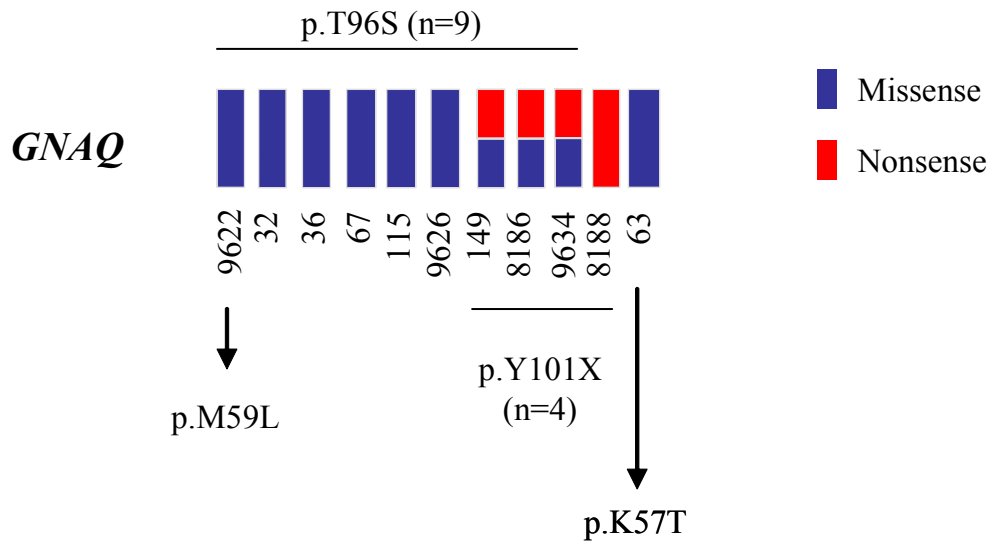

**Supplementary Fig. 3** Fifteen point mutations in *GNAQ* were identified in 11 NKTCL samples: 9 mutations encoding T96S, 4 mutations encoding Y101X, and one mutation encoding p.K57T, and one mutation encoding p.M59L. Mutations in T96S cooccurred with Y101X and p.M59L in 3 cases and one case, respectively.

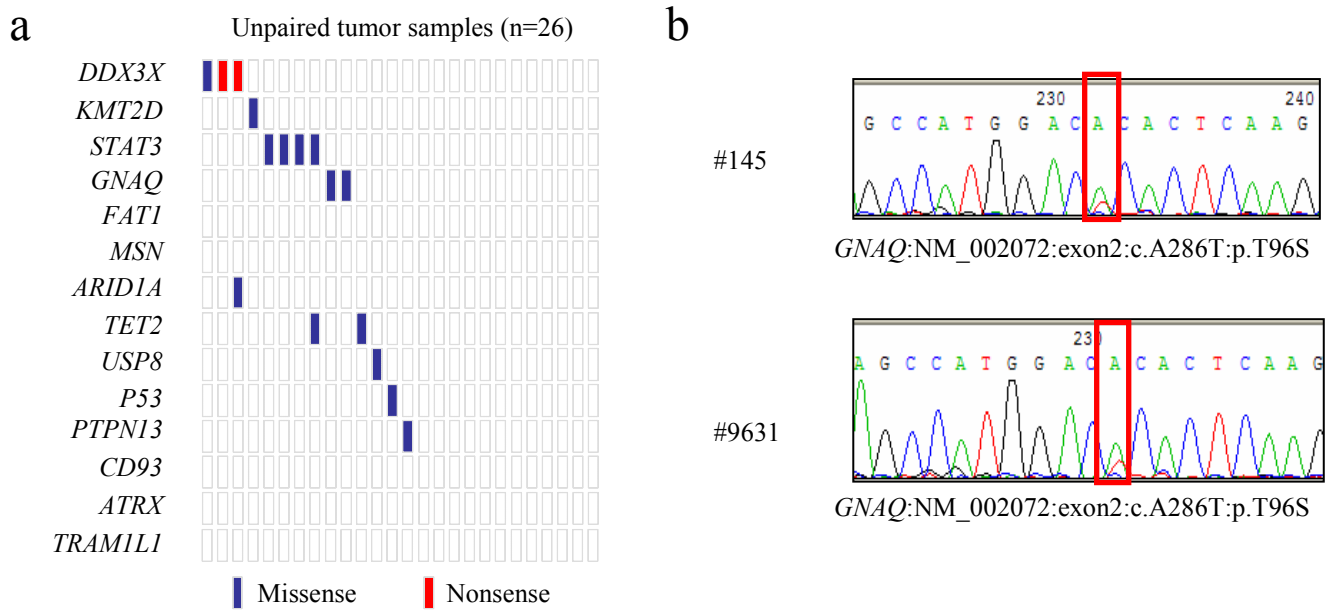

**Supplementary Fig. 4** Validation of the frequently mutated genes in an independent cohort of NKTCL (n=26) with no matched normal tissue. **a** Mutation status of the 14 frequently mutated genes in this cohort. **b** Validation of *GNAQ* T96S mutations in two NKTCL patients (#145 and #9631) by Sanger sequencing.

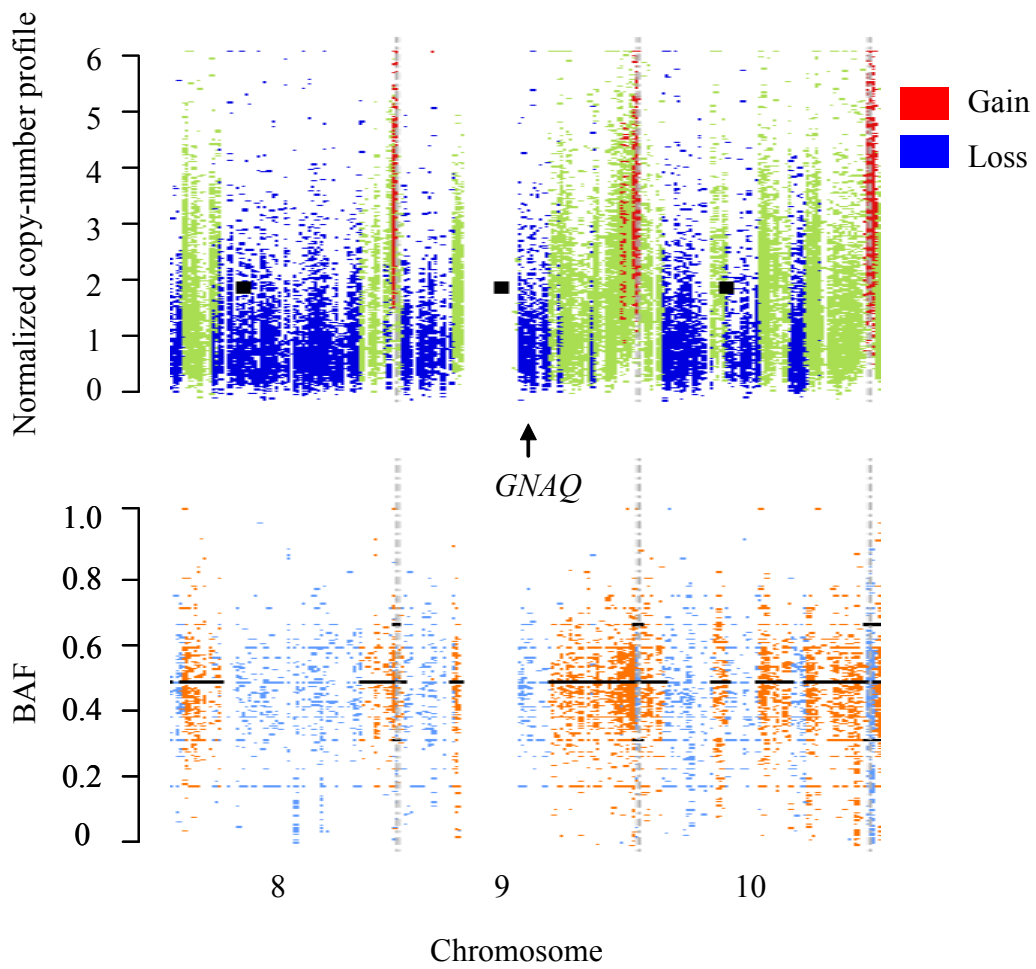

**Supplementary Fig. 5** Control-FREEC calculates copy number and BAF profiles and detects regions of copy number gain/loss.

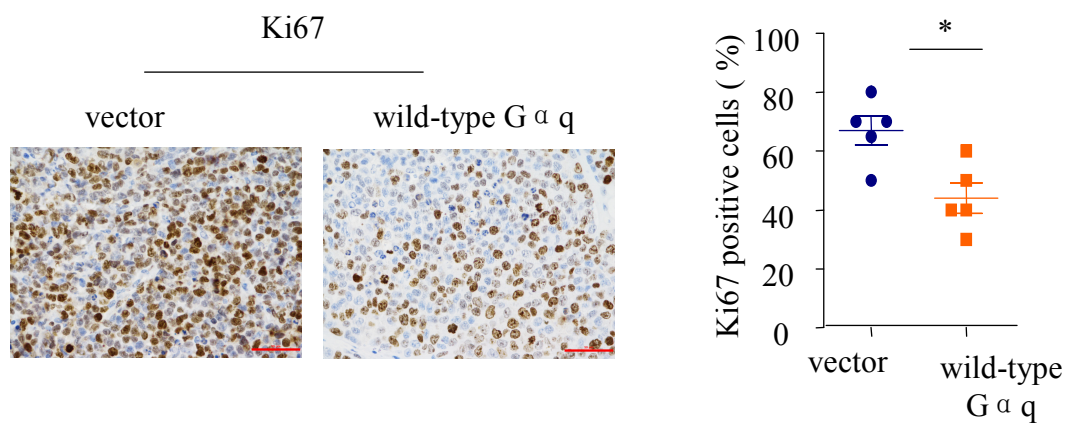

**Supplementary Fig. 6** Representative images and quantitative data for Ki67 staining of xenograft tumor tissues. Data are expressed as the mean $\pm$ s.e.m.; scale bars, 50  $\mu$ m. \* $<$ 0.05. Source data are provided as a Source Data file.



a

p-AKT

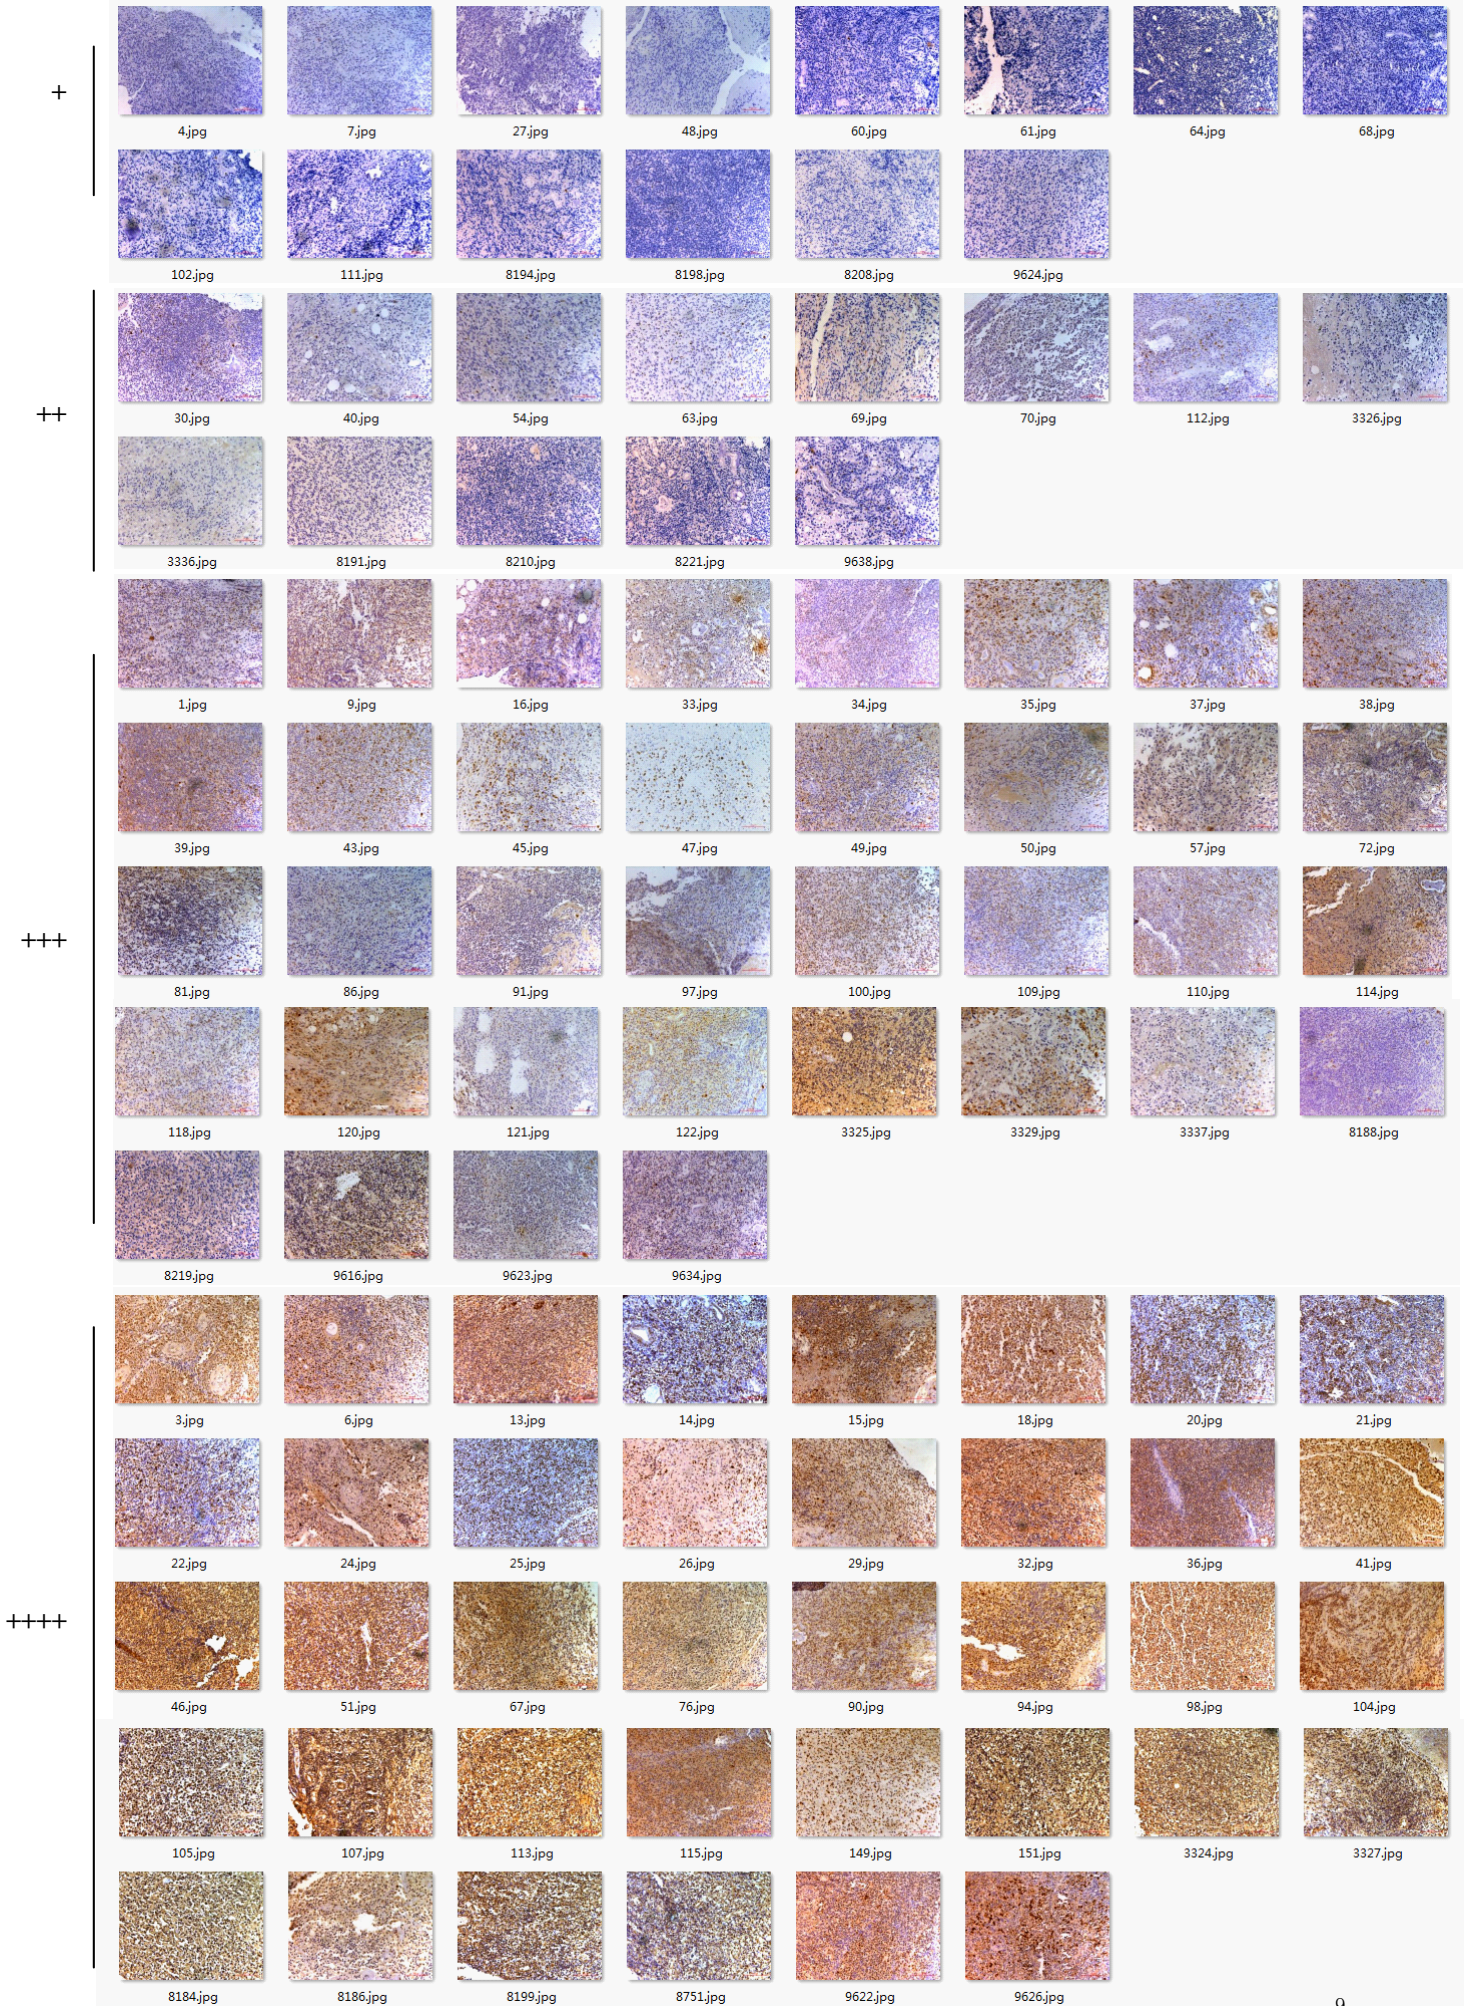



b

p-ERK

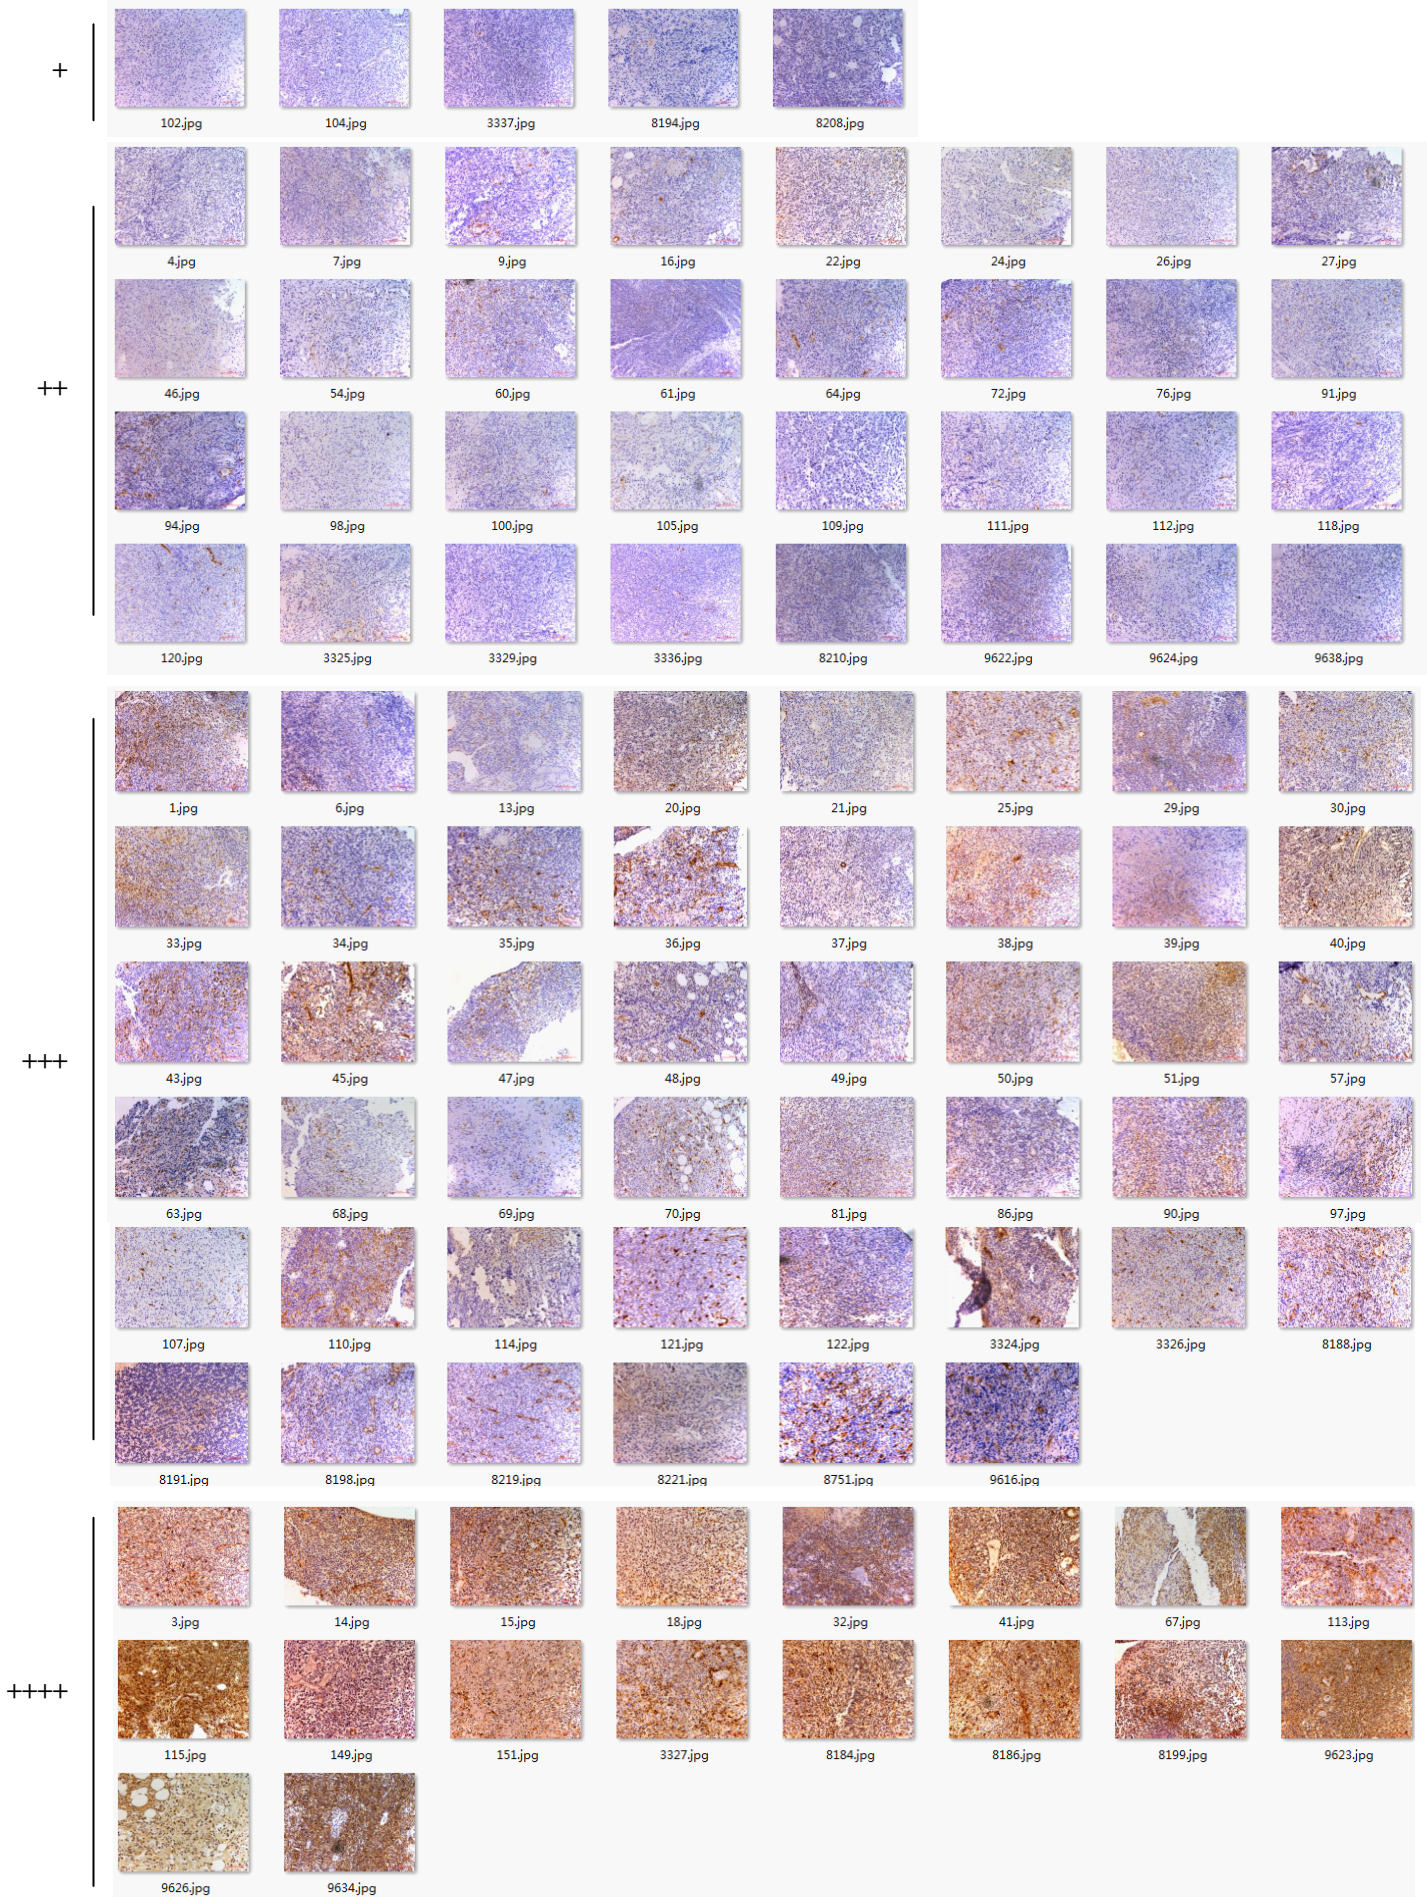



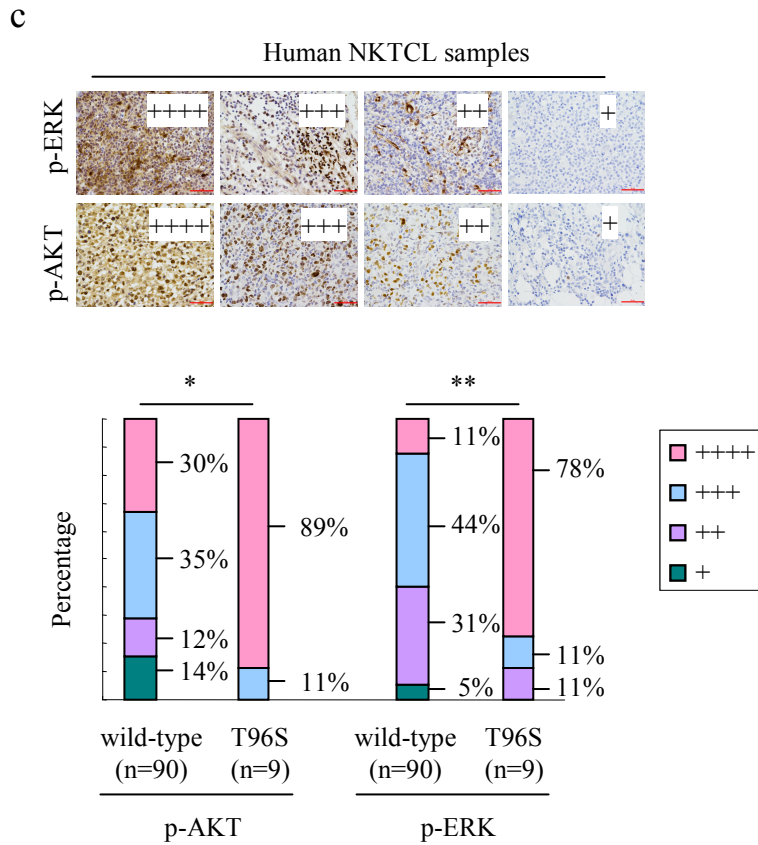

**Supplementary Fig. 7** Immunohistochemical staining results of phospho-AKT (a) and phospho-ERK (b) in human NKTCL samples with wild-type (n=90) and T96S mutant (n=9). The expression levels of phospho-ERK and phospho-AKT were scored semiquantitatively according to the percentage of IHC-positive cells: +, 0%; ++, 1–10%; +++, 11–50%; +++++, >50%. *p* values were calculated using a two-sided Fisher's exact test (c). Scale bars, 50  $\mu$ m. \**p*<0.05, \*\**p*<0.01.



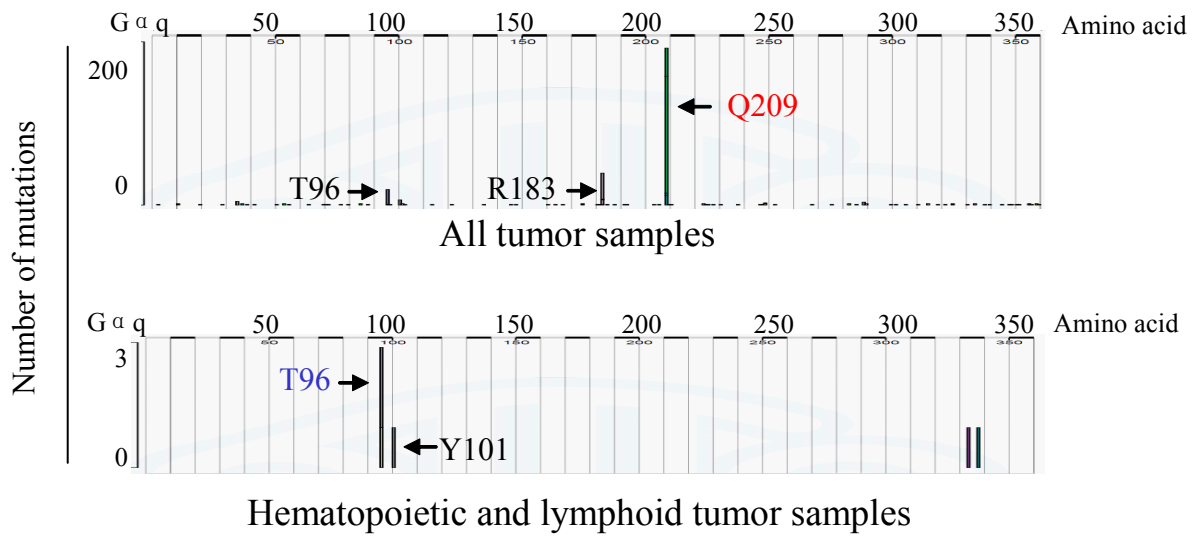

**Supplementary Fig. 9** The most common sites of *GNAQ* mutations identified in different tumor tissues in the COSMIC database.

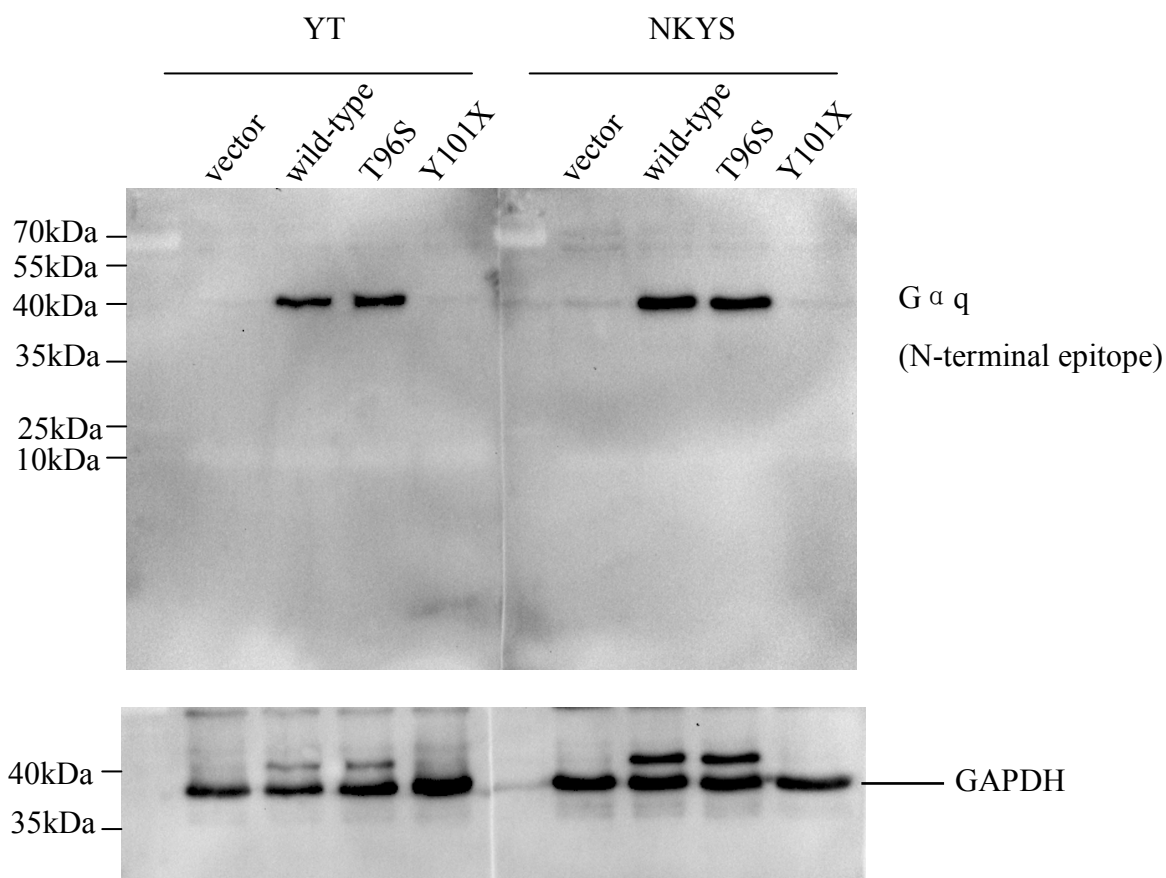

**Supplementary Fig. 10** Western blot analysis of G $\alpha$ q Y101X mutant expression in YT and NKYS cells.

Supplementary Table 1. Demographics and clinical features of 127 subjects with NKTCL.

| NO. | Patient ID | Age (year) | Gender | ECOG PS | Ann Arbor stage | LDH      | B symptoms | IPI | Primary site | Ki67 | EBV DNA  | TCR rearrangement | PFS (month) | PFS event | OS (month) | OS event | Therapy | Sequencing | CD56 | CD3ε | EBER | TIA1 | Granzyme B | CD2 | CD4 | CD8 | βF1 | TCRγ |
|-----|------------|------------|--------|---------|-----------------|----------|------------|-----|--------------|------|----------|-------------------|-------------|-----------|------------|----------|---------|------------|------|------|------|------|------------|-----|-----|-----|-----|------|
| 1   | 9624       | 38         | Male   | 1       | II              | Normal   | Absence    | 0   | Nasal        | 70%  | Normal   | -                 | 8.0         | 0.0       | 22.6       | 0        | CT+RT   | WES        | +    | +    | +    | +    | +          | +   | -   | -   | -   | -    |
| 2   | 3329       | 54         | Male   | 1       | II              | Normal   | Presence   | 0   | Nasal        | 50%  | Normal   | -                 | 27.9        | 0.0       | 27.9       | 0        | CT+RT   | WES        | +    | +    | +    | -    | +          | +   | -   | -   | -   | -    |
| 3   | 8191       | 46         | Male   | 0       | I               | Normal   | Absence    | 0   | Nasal        | 20%  | Normal   | -                 | 59.0        | 0.0       | 59.0       | 0        | CT+RT   | WES        | +    | +    | +    | +    | +          | +   | -   | -   | -   | -    |
| 4   | 8194       | 70         | Male   | 0       | II              | Normal   | Absence    | 1   | Nasal        | 70%  | Normal   | -                 | 56.5        | 0.0       | 56.5       | 0        | CT+RT   | WES        | +    | +    | +    | +    | +          | +   | -   | -   | -   | -    |
| 5   | 8186       | 56         | Female | 0       | II              | Normal   | Absence    | 0   | Nasal        | 70%  | Elevated | -                 | 22.0        | 1.0       | 26.0       | 1        | CT+RT   | WES        | +    | +    | +    | +    | +          | +   | -   | -   | -   | -    |
| 6   | 8184       | 54         | Male   | 0       | III             | Normal   | Absence    | 1   | Nasal        | 70%  | Elevated | -                 | 62.0        | 0.0       | 62.0       | 0        | CT      | WES        | +    | +    | +    | +    | +          | +   | -   | -   | -   | -    |
| 7   | 3324       | 37         | Male   | 0       | II              | Normal   | Absence    | 0   | Nasal        | 80%  | Normal   | -                 | 39.0        | 1.0       | 39.0       | 1        | CT+RT   | WES        | +    | +    | +    | +    | +          | -   | -   | -   | -   | -    |
| 8   | 9638       | 56         | Male   | 0       | IV              | Normal   | Absence    | 2   | Nasal        | 40%  | Normal   | -                 | 7.0         | 1.0       | 7.0        | 1        | CT+RT   | WES        | +    | +    | +    | +    | +          | +   | -   | -   | -   | -    |
| 9   | 9634       | 18         | Female | 1       | IV              | Normal   | Presence   | 2   | Nasal        | 60%  | Elevated | -                 | 36.0        | 1.0       | 36.0       | 1        | CT      | WES        | +    | +    | +    | +    | +          | +   | -   | -   | -   | -    |
| 10  | 8221       | 28         | Female | 2       | II              | Elevated | Absence    | 2   | Nasal        | 60%  | Normal   | -                 | 53.5        | 0.0       | 53.5       | 0        | CT+RT   | WES        | +    | +    | +    | +    | +          | +   | -   | -   | -   | -    |
| 11  | 8219       | 50         | Male   | 1       | II              | Normal   | Absence    | 0   | Nasal        | 60%  | Normal   | -                 | 53.0        | 0.0       | 53.0       | 0        | CT+RT   | WES        | +    | +    | +    | +    | +          | -   | -   | -   | -   | -    |
| 12  | 9623       | 35         | Male   | 1       | I               | Normal   | Absence    | 0   | Nasal        | 60%  | NA       | -                 | 48.0        | 0.0       | 48.0       | 0        | CT+RT   | WES        | +    | +    | +    | +    | +          | +   | -   | -   | -   | -    |
| 13  | 8199       | 22         | Male   | 0       | II              | Normal   | Presence   | 0   | Nasal        | 30%  | Normal   | -                 | 55.3        | 0.0       | 55.3       | 0        | CT+RT   | WES        | +    | +    | +    | +    | +          | +   | -   | -   | -   | -    |
| 14  | 3325       | 51         | Female | 0       | I               | Normal   | Presence   | 0   | Nasal        | 90%  | Normal   | -                 | 42.0        | 1.0       | 42.0       | 1        | CT+RT   | WES        | +    | +    | +    | +    | +          | +   | -   | -   | -   | -    |
| 15  | 8188       | 29         | Female | 0       | I               | Normal   | Presence   | 0   | Nasal        | 70%  | Normal   | -                 | 60.0        | 1.0       | 60.0       | 1        | CT      | WES        | +    | +    | +    | +    | +          | +   | -   | -   | -   | -    |
| 16  | 8210       | 54         | Male   | 1       | I               | Normal   | Presence   | 0   | Nasal        | 40%  | Normal   | +                 | 51.0        | 0.0       | 51.0       | 0        | CT+RT   | WES        | +    | +    | +    | +    | +          | +   | -   | -   | -   | -    |
| 17  | 8751       | 37         | Female | 1       | II              | Normal   | Absence    | 0   | Nasal        | 50%  | Normal   | -                 | 55.0        | 0.0       | 55.0       | 0        | CT+RT   | WES        | +    | +    | +    | +    | +          | +   | -   | -   | -   | -    |
| 18  | 9626       | 32         | Female | 1       | II              | Normal   | Absence    | 0   | Nasal        | 60%  | Normal   | -                 | 49.0        | 1.0       | 49.0       | 0        | CT      | WES        | +    | +    | +    | +    | +          | +   | -   | -   | -   | -    |
| 19  | 149        | 52         | Male   | 2       | III             | Normal   | Presence   | 2   | Nasal        | 60%  | Elevated | -                 | 44.0        | 1.0       | 44.0       | 1        | CT+RT   | WES        | +    | +    | +    | +    | +          | +   | -   | -   | -   | -    |
| 20  | 3336       | 47         | Male   | 1       | II              | Normal   | Absence    | 0   | Nasal        | 50%  | Normal   | -                 | 5.0         | 1.0       | 37.6       | 1        | CT+RT   | WES        | +    | +    | +    | +    | +          | +   | -   | -   | -   | -    |
| 21  | 3337       | 27         | Female | 1       | IV              | Elevated | Presence   | 3   | Nasal        | 30%  | NA       | -                 | 38.0        | 0.0       | 38.0       | 0        | CT      | WES        | +    | +    | +    | +    | +          | +   | -   | -   | -   | -    |
| 22  | 9622       | 38         | Male   | 1       | IV              | Normal   | Presence   | 2   | Nasal        | 70%  | Elevated | +                 | 6.0         | 1.0       | 10.0       | 1        | CT      | WES        | +    | +    | +    | -    | +          | +   | -   | -   | -   | -    |
| 23  | 8208       | 56         | Male   | 0       | II              | Elevated | Presence   | 1   | Nasal        | 40%  | Normal   | -                 | 50.0        | 0.0       | 50.0       | 0        | CT+RT   | WES        | +    | +    | +    | +    | +          | +   | -   | -   | -   | -    |
| 24  | 8198       | 46         | Male   | 1       | II              | Normal   | Absence    | 0   | Nasal        | 60%  | Normal   | -                 | 48.0        | 0.0       | 48.0       | 0        | CT+RT   | WES        | +    | +    | +    | +    | +          | +   | -   | -   | -   | -    |
| 25  | 9616       | 49         | Male   | 3       | IV              | Normal   | Presence   | 3   | Nasal        | 60%  | Elevated | -                 | 1.0         | 1.0       | 44.0       | 1        | CT      | WES        | +    | +    | +    | +    | +          | +   | -   | -   | -   | -    |
| 26  | 3326       | 64         | Male   | 2       | I               | Elevated | Presence   | 3   | Nasal        | 80%  | NA       | +                 | 44.0        | 0.0       | 44.0       | 0        | CT      | WES        | +    | +    | +    | +    | +          | +   | -   | -   | -   | -    |
| 27  | 151        | 65         | Male   | 0       | I               | Normal   | Presence   | 2   | Nasal        | 40%  | Elevated | -                 | 68.0        | 0.0       | 68.0       | 0        | RT      | WES        | +    | +    | +    | +    | +          | +   | -   | -   | -   | -    |
| 28  | 3327       | 56         | Male   | 1       | I               | Elevated | Absence    | 1   | Nasal        | 40%  | Elevated | -                 | 49.0        | 0.0       | 49.0       | 0        | CT      | WES        | +    | +    | +    | +    | +          | +   | -   | -   | -   | -    |
| 29  | 100        | 15         | Male   | 1       | II              | Elevated | Presence   | 1   | Nasal        | 61%  | Normal   | -                 | 9.5         | 1.0       | 9.5        | 1        | CT      | TS         | +    | +    | +    | +    | +          | +   | -   | -   | -   | -    |
| 30  | 102        | 33         | Male   | 0       | IV              | Normal   | Absence    | 2   | Nasal        | 80%  | Normal   | -                 | 3.0         | 0.0       | 11.0       | 0        | CT      | TS         | +    | +    | +    | +    | +          | +   | -   | -   | -   | -    |
| 31  | 104        | 28         | Male   | 1       | I               | Normal   | Presence   | 0   | Nasal        | 50%  | Normal   | +                 | 14.0        | 0.0       | 14.0       | 0        | CT      | TS         | +    | +    | +    | +    | +          | +   | -   | -   | -   | -    |
| 32  | 105        | 70         | Male   | 1       | IV              | Elevated | Absence    | 4   | Nasal        | 80%  | Elevated | -                 | 16.0        | 1.0       | 16.0       | 1        | CT      | TS         | +    | +    | +    | +    | +          | +   | -   | -   | -   | -    |
| 33  | 107        | 45         | Male   | 3       | IV              | Normal   | Absence    | 3   | Nasal        | 90%  | Elevated | -                 | 5.8         | 1.0       | 8.8        | 1        | CT      | TS         | +    | +    | +    | +    | +          | +   | -   | -   | -   | -    |
| 34  | 109        | 43         | Male   | 0       | II              | Normal   | Absence    | 0   | Nasal        | 30%  | Elevated | -                 | 24.0        | 1.0       | 24.0       | 1        | CT      | TS         | +    | +    | +    | +    | +          | +   | -   | -   | -   | -    |

|    |     |    |        |   |     |          |          |   |               |     |          |   |      |     |      |   |       |    |   |   |   |   |   |   |   |     |   |   |
|----|-----|----|--------|---|-----|----------|----------|---|---------------|-----|----------|---|------|-----|------|---|-------|----|---|---|---|---|---|---|---|-----|---|---|
| 35 | 110 | 59 | Female | 1 | IV  | Elevated | Absence  | 3 | Adrenal gland | 90% | Elevated | - | 3.0  | 1.0 | 7.0  | 1 | CT    | TS | + | + | + | + | + | + | - | -   | - | - |
| 36 | 111 | 35 | Female | 3 | IV  | Elevated | Presence | 4 | Intestine     | 70% | Elevated | - | 3.0  | 1.0 | 3.5  | 1 | CT    | TS | + | + | + | + | + | + | - | -   | - | - |
| 37 | 112 | 50 | Male   | 0 | I   | Normal   | Absence  | 0 | Nasal         | 70% | Normal   | - | 16.0 | 0.0 | 16.0 | 0 | RT    | TS | + | + | + | + | + | + | - | -   | - | - |
| 38 | 113 | 49 | Male   | 1 | IV  | Elevated | Presence | 3 | Intestine     | 40% | NA       | - | 14.5 | 0.0 | 14.5 | 0 | CT    | TS | + | + | + | + | + | + | - | -   | - | - |
| 39 | 114 | 70 | Male   | 0 | I   | Elevated | Absence  | 2 | Nasal         | 80% | Elevated | + | 69.0 | 0.0 | 69.0 | 0 | CT    | TS | + | + | + | + | + | + | - | -   | - | + |
| 40 | 115 | 60 | Male   | 1 | II  | Normal   | Absence  | 0 | Nasal         | 40% | Normal   | - | 49.0 | 1.0 | 49.0 | 0 | CT+RT | TS | + | + | + | + | + | + | - | -   | - | - |
| 41 | 118 | 47 | Male   | 2 | III | Elevated | Presence | 3 | Nasal         | 80% | Elevated | - | 16.0 | 1.0 | 16.0 | 1 | CT    | TS | + | + | + | + | + | + | - | -   | - | - |
| 42 | 120 | 74 | Male   | 1 | IV  | Normal   | Absence  | 3 | Penis         | 40% | Elevated | - | 14.0 | 0.0 | 14.0 | 0 | CT    | TS | + | + | + | + | + | - | - | -   | - | - |
| 43 | 121 | 8  | Male   | 0 | IV  | Elevated | Absence  | 3 | Nasal         | 60% | Normal   | - | 7.0  | 1.0 | 14.0 | 1 | CT    | TS | + | + | + | + | + | + | - | -   | - | - |
| 44 | 122 | 32 | Male   | 1 | III | Normal   | Absence  | 1 | Nasal         | 60% | Normal   | - | 15.0 | 0.0 | 15.0 | 0 | CT    | TS | + | + | + | + | + | + | - | -   | - | - |
| 45 | 32  | 61 | Male   | 2 | III | Elevated | Presence | 4 | Nasal         | 70% | NA       | - | 1.0  | 1.0 | 1.0  | 1 | CT    | TS | + | + | + | + | + | + | - | -   | - | - |
| 46 | 33  | 51 | Male   | 0 | III | Normal   | Absence  | 1 | Nasal         | 40% | Normal   | - | 20.0 | 0.0 | 34.0 | 0 | CT    | TS | + | + | + | + | + | + | - | -   | - | - |
| 47 | 34  | 34 | Male   | 1 | III | Elevated | Absence  | 2 | Nasal         | 50% | Normal   | - | 30.0 | 1.0 | 30.0 | 1 | CT    | TS | + | + | + | + | + | + | - | -   | - | - |
| 48 | 35  | 43 | Female | 0 | II  | Normal   | Absence  | 0 | Nasal         | 60% | NA       | - | 2.0  | 0.0 | 42.0 | 0 | CT+RT | TS | + | + | + | + | + | + | - | -   | - | - |
| 49 | 36  | 15 | Male   | 1 | IV  | Elevated | Presence | 3 | Nasal         | 60% | Normal   | - | 4.3  | 1.0 | 4.3  | 1 | CT    | TS | + | + | + | + | + | + | - | -   | - | - |
| 50 | 37  | 59 | Male   | 1 | I   | Normal   | Absence  | 0 | Nasal         | 40% | NA       | - | 24.5 | 0.0 | 24.5 | 0 | RT    | TS | + | + | + | + | + | + | - | -   | - | - |
| 51 | 38  | 51 | Male   | 1 | I   | Normal   | Absence  | 1 | Intestine     | 70% | NA       | - | 34.0 | 1.0 | 34.0 | 0 | CT    | TS | + | + | + | + | + | + | - | -   | - | - |
| 52 | 39  | 74 | Male   | 0 | I   | Normal   | Absence  | 1 | Nasal         | 81% | Normal   | - | 37.0 | 0.0 | 37.0 | 0 | CT+RT | TS | + | + | + | + | + | + | - | -   | - | - |
| 53 | 40  | 35 | Male   | 1 | II  | Normal   | Presence | 0 | Nasal         | 70% | Elevated | - | 4.0  | 1.0 | 30.5 | 0 | CT+RT | TS | + | + | + | + | + | + | - | -   | - | - |
| 54 | 41  | 66 | Female | 1 | I   | Normal   | Presence | 2 | Intestine     | 90% | Normal   | - | 6.0  | 1.0 | 6.0  | 1 | CT    | TS | + | + | + | + | + | + | - | -   | - | - |
| 55 | 43  | 35 | Female | 1 | IV  | Elevated | Absence  | 3 | Nasal         | 10% | Elevated | - | 12.5 | 1.0 | 12.5 | 1 | CT+RT | TS | + | + | + | + | + | + | - | -   | - | - |
| 56 | 45  | 57 | Male   | 1 | I   | Normal   | Absence  | 0 | Nasal         | 10% | Normal   | - | 28.0 | 0.0 | 28.0 | 0 | CT+RT | TS | + | + | + | + | + | + | - | -   | - | - |
| 57 | 46  | 53 | Male   | 1 | I   | Elevated | Absence  | 1 | Nasal         | 70% | Normal   | - | 28.0 | 0.0 | 28.0 | 0 | CT+RT | TS | + | + | + | + | + | + | - | -   | - | - |
| 58 | 47  | 36 | Female | 0 | III | Normal   | Absence  | 1 | Nasal         | 60% | Normal   | - | 35.0 | 0.0 | 35.0 | 0 | CT    | TS | + | + | + | + | + | + | - | -   | - | - |
| 59 | 48  | 44 | Female | 1 | I   | Normal   | Presence | 0 | Nasal         | 50% | Normal   | - | 24.0 | 1.0 | 24.0 | 1 | CT+RT | TS | + | + | + | + | + | + | - | -   | - | - |
| 60 | 49  | 58 | Male   | 1 | III | Elevated | Presence | 2 | Nasal         | 30% | NA       | + | 4.0  | 0.0 | 40.0 | 0 | CT    | TS | + | + | + | + | + | + | - | +/- | - | + |
| 61 | 50  | 28 | Male   | 1 | II  | Elevated | Absence  | 1 | Nasal         | 70% | Normal   | - | 28.6 | 0.0 | 28.6 | 0 | CT+RT | TS | + | + | + | + | + | + | - | -   | - | - |
| 62 | 51  | 50 | Female | 1 | II  | Normal   | Absence  | 0 | Nasal         | 60% | NA       | - | 32.0 | 1.0 | 46.0 | 0 | CT+RT | TS | + | + | + | + | + | + | - | -   | - | - |
| 63 | 54  | 76 | Female | 1 | II  | Normal   | Presence | 1 | Nasal         | 40% | NA       | - | 3.0  | 0.0 | 30.0 | 0 | CT    | TS | + | + | + | + | + | + | - | -   | - | - |
| 64 | 57  | 48 | Male   | 1 | IV  | Normal   | Presence | 2 | Nasal         | 90% | Normal   | - | 21.0 | 1.0 | 21.0 | 1 | CT    | TS | + | + | + | + | + | + | - | -   | - | - |
| 65 | 60  | 34 | Female | 0 | II  | Normal   | Absence  | 0 | Nasal         | 40% | Normal   | - | 6.0  | 0.0 | 62.0 | 0 | CT    | TS | + | + | + | + | + | + | - | -   | - | - |
| 66 | 61  | 55 | Male   | 1 | III | Elevated | Presence | 2 | Nasal         | 80% | NA       | - | 8.0  | 0.0 | 63.0 | 0 | CT    | TS | + | + | + | + | + | + | - | -   | - | - |
| 67 | 63  | 33 | Male   | 1 | IV  | Elevated | Presence | 3 | Nasal         | 60% | Elevated | - | 20.0 | 1.0 | 20.0 | 1 | CT    | TS | + | + | + | + | + | + | - | -   | - | - |
| 68 | 64  | 50 | Male   | 1 | III | Normal   | Presence | 1 | Nasal         | 70% | Elevated | - | 24.0 | 0.0 | 24.0 | 0 | CT    | TS | + | + | + | + | + | + | - | -   | - | - |
| 69 | 67  | 61 | Male   | 1 | III | Normal   | Presence | 2 | Nasal         | 80% | Elevated | - | 8.3  | 1.0 | 8.3  | 1 | CT    | TS | + | + | + | + | + | + | - | -   | - | - |
| 70 | 68  | 42 | Male   | 1 | II  | Normal   | Absence  | 0 | Nasal         | 60% | NA       | - | 29.0 | 0.0 | 35.0 | 0 | CT+RT | TS | + | + | + | + | + | + | - | -   | - | - |
| 71 | 69  | 23 | Female | 1 | I   | Elevated | Absence  | 1 | Nasal         | 70% | NA       | - | 25.0 | 1.0 | 40.0 | 1 | CT    | TS | + | + | + | + | + | + | - | -   | - | - |
| 72 | 70  | 40 | Female | 1 | I   | Normal   | Absence  | 0 | Nasal         | 20% | NA       | - | 40.0 | 0.0 | 40.0 | 0 | CT+RT | TS | + | + | + | + | + | + | - | -   | - | - |

|     |        |    |        |   |     |          |          |   |            |     |          |   |      |     |      |    |       |     |   |   |   |   |   |   |     |     |   |   |
|-----|--------|----|--------|---|-----|----------|----------|---|------------|-----|----------|---|------|-----|------|----|-------|-----|---|---|---|---|---|---|-----|-----|---|---|
| 73  | 72     | 41 | Male   | 1 | II  | Elevated | Absence  | 2 | Lung       | 20% | Normal   | - | 10.0 | 0.0 | 31.0 | 0  | CT+RT | TS  | + | + | + | + | + | + | -   | -   | - | - |
| 74  | 76     | 45 | Male   | 1 | I   | Normal   | Presence | 0 | Nasal      | 40% | Normal   | - | 28.0 | 0.0 | 28.0 | 0  | CT    | TS  | + | + | + | + | + | + | -   | -   | - | - |
| 75  | 81     | 44 | Female | 1 | IV  | Elevated | Presence | 3 | Nasal      | 60% | Elevated | - | 1.5  | 1.0 | 1.5  | 1  | CT    | TS  | + | + | + | + | + | + | -   | -   | - | - |
| 76  | 86     | 42 | Male   | 1 | I   | Normal   | Absence  | 0 | Nasal      | 40% | Elevated | + | 7.0  | 1.0 | 7.0  | 1  | CT+RT | TS  | + | + | + | + | + | + | -   | -   | - | + |
| 77  | 90     | 54 | Female | 1 | I   | Normal   | Absence  | 0 | Nasal      | 30% | Normal   | - | 30.0 | 1.0 | 48.0 | 0  | RT    | TS  | + | + | + | + | + | + | -   | -   | - | - |
| 78  | 91     | 20 | Male   | 1 | II  | Normal   | Absence  | 0 | Nasal      | 90% | Normal   | + | 18.0 | 1.0 | 18.0 | 1  | RT    | TS  | + | + | + | + | + | + | -   | -   | - | + |
| 79  | 97     | 22 | Female | 1 | II  | Normal   | Presence | 1 | Lymph node | 80% | Elevated | - | 4.2  | 1.0 | 6.0  | 1  | CT    | TS  | + | + | + | + | + | + | -   | -   | - | - |
| 80  | 98     | 29 | Male   | 1 | II  | Elevated | Presence | 2 | Skin       | 30% | Elevated | - | 14.0 | 1.0 | 27.0 | 1  | CT+RT | TS  | + | + | + | + | + | + | -   | -   | - | - |
| 81  | 94     | 17 | Female | 1 | I   | Elevated | Presence | 1 | Nasal      | 40% | NA       | - | 48.0 | 0.0 | 63.0 | 0  | CT+RT | TS  | + | + | + | + | + | + | -   | -   | - | - |
| 82  | 25     | 23 | Female | 0 | II  | Normal   | Presence | 0 | Nasal      | 40% | Normal   | - | 9.0  | 0.0 | 63.0 | 0  | CT    | TS  | + | + | + | + | + | + | -   | -   | - | - |
| 83  | 24     | 39 | Male   | 1 | II  | Normal   | Presence | 0 | Nasal      | 40% | Normal   | - | 37.0 | 1.0 | 39.0 | 1  | CT+RT | TS  | + | + | + | + | + | + | -   | -   | - | - |
| 84  | 22     | 46 | Male   | 0 | II  | Normal   | Absence  | 0 | Nasal      | 30% | Normal   | - | 66.0 | 0.0 | 66.0 | 0  | CT    | TS  | + | + | + | + | + | + | -   | -   | - | - |
| 85  | 21     | 51 | Male   | 1 | II  | Normal   | Absence  | 0 | Nasal      | 60% | Normal   | - | 17.0 | 0.0 | 17.0 | 0  | CT+RT | TS  | + | + | + | + | + | + | -   | -   | - | - |
| 86  | 20     | 58 | Male   | 0 | II  | Normal   | Absence  | 0 | Nasal      | 30% | Normal   | - | 45.0 | 0.0 | 60.0 | 0  | CT+RT | TS  | + | + | + | + | + | + | -   | -   | - | - |
| 87  | 9      | 38 | Male   | 1 | II  | Elevated | Absence  | 1 | Nasal      | 20% | Normal   | - | 12.0 | 0.0 | 45.0 | 0  | CT+RT | TS  | + | + | + | + | + | + | -   | -   | - | - |
| 88  | 7      | 52 | Male   | 1 | II  | Elevated | Presence | 1 | Nasal      | 20% | Normal   | - | 8.0  | 1.0 | 8.0  | 1  | CT+RT | TS  | + | + | + | + | + | + | -   | -   | - | - |
| 89  | 6      | 44 | Male   | 0 | I   | Normal   | Absence  | 0 | Nasal      | 30% | Normal   | - | 16.0 | 0.0 | 36.0 | 0  | RT    | TS  | + | + | + | + | + | + | -   | -   | - | - |
| 90  | 4      | 74 | Male   | 1 | II  | Elevated | Absence  | 2 | Nasal      | 80% | Normal   | - | 10.0 | 0.0 | 38.0 | 0  | CT+RT | TS  | + | + | + | + | + | + | -   | -   | - | - |
| 91  | 30     | 55 | Female | 1 | II  | Normal   | Absence  | 0 | Nasal      | 30% | NA       | - | 63.0 | 0.0 | 63.0 | 0  | CT    | TS  | + | + | + | + | + | + | -   | -   | - | - |
| 92  | 3      | 52 | Male   | 0 | III | Normal   | Absence  | 2 | Esophagus  | 90% | Normal   | - | 13.0 | 0.0 | 13.0 | 0  | CT+RT | TS  | + | + | + | + | + | + | -   | -   | - | - |
| 93  | 29     | 37 | Male   | 0 | I   | Normal   | Absence  | 0 | Nasal      | 40% | NA       | - | 59.0 | 1.0 | 59.0 | 1  | CT    | TS  | + | + | + | + | + | + | -   | -   | - | - |
| 94  | 27     | 56 | Male   | 1 | I   | Normal   | Presence | 0 | Nasal      | 60% | NA       | - | 60.0 | 1.0 | 60.0 | 1  | CT    | TS  | + | + | + | + | + | + | -   | -   | - | - |
| 95  | 26     | 18 | Female | 1 | IV  | Normal   | Absence  | 2 | Nasal      | 30% | NA       | - | 23.0 | 1.0 | 23.0 | 1  | CT+RT | TS  | + | + | + | + | + | + | -   | -   | - | - |
| 96  | 18     | 62 | Female | 1 | I   | Normal   | Presence | 1 | Nasal      | 40% | Normal   | - | 23.0 | 1.0 | 27.0 | 1  | CT    | TS  | + | + | + | + | + | + | -   | -   | - | - |
| 97  | 16     | 51 | Male   | 1 | II  | Normal   | Absence  | 0 | Nasal      | 50% | Normal   | - | 18.0 | 0.0 | 40.0 | 0  | RT    | TS  | + | + | + | + | + | + | -   | -   | - | - |
| 98  | 15     | 36 | Male   | 0 | I   | Elevated | Presence | 1 | Nasal      | 70% | Normal   | - | 1.2  | 0.0 | 1.2  | 0  | CT    | TS  | + | + | + | + | + | + | -   | -   | - | - |
| 99  | 14     | 24 | Male   | 0 | I   | Normal   | Absence  | 0 | Nasal      | 60% | Normal   | - | 28.0 | 0.0 | 28.0 | 1  | CT    | TS  | + | + | + | + | + | + | -   | -   | - | - |
| 100 | 13     | 28 | Female | 1 | I   | Normal   | Absence  | 0 | Nasal      | 40% | Normal   | - | 50.0 | 0.0 | 50.0 | 0  | CT    | TS  | + | + | + | + | + | + | -   | -   | - | - |
| 101 | 1      | 36 | Female | 1 | II  | Normal   | Absence  | 0 | Nasal      | 40% | Normal   | - | 35.0 | 1.0 | 42.0 | 0  | CT    | TS  | + | + | + | + | + | + | -   | -   | - | - |
| 102 | 8170 * | 22 | Female | 0 | II  | Normal   | Absence  | 0 | Nasal      | 60% | NA       | - | NA   | NA  | NA   | NA | CT+RT | WES | + | + | + | + | + | + | +/- | -   | - | - |
| 103 | 8173 * | 42 | Female | 1 | II  | Normal   | Presence | 0 | Nasal      | 70% | Normal   | - | NA   | NA  | NA   | NA | CT+RT | WES | + | + | + | + | + | + | -   | -   | - | - |
| 104 | 8178 * | 40 | Male   | 2 | I   | Normal   | Presence | 1 | Nasal      | 50% | NA       | + | NA   | NA  | NA   | NA | CT+RT | WES | + | + | + | + | + | + | -   | -   | - | + |
| 105 | 8181 * | 40 | Female | 1 | II  | Normal   | Absence  | 0 | Nasal      | 50% | Normal   | - | 36   | 0   | 36   | 0  | CT+RT | WES | + | + | + | + | + | + | -   | -   | - | - |
| 106 | 8185 * | 38 | Female | 0 | II  | Normal   | Absence  | 1 | Nasal      | 90% | NA       | - | NA   | NA  | NA   | NA | RT    | WES | + | + | + | + | + | + | -   | +/- | - | - |
| 107 | 8192 * | 27 | Male   | 1 | II  | Normal   | Absence  | 1 | Nasal      | 70% | Normal   | - | NA   | NA  | NA   | NA | CT    | WES | + | + | + | + | + | + | -   | -   | - | - |
| 108 | 8195 * | 64 | Female | 1 | III | Normal   | Presence | 3 | Nasal      | 70% | Normal   | - | 20   | 1   | 24   | 1  | CT+RT | WES | + | + | + | + | + | + | -   | -   | - | - |
| 109 | 8203 * | 55 | Female | 0 | III | Elevated | Presence | 3 | Nasal      | 80% | Elevated | - | NA   | NA  | NA   | NA | CT+RT | WES | + | + | + | + | + | + | -   | -   | - | - |
| 110 | 8204 * | 63 | Female | 0 | II  | Elevated | Presence | 3 | Nasal      | 70% | Normal   | - | NA   | NA  | NA   | NA | RT    | WES | + | + | + | + | + | + | -   | -   | - | - |
| 111 | 8206 * | 66 | Female | 0 | II  | Elevated | Presence | 2 | Nasal      | 60% | Elevated | - | NA   | NA  | NA   | NA | CT    | WES | + | + | + | + | + | + | -   | -   | - | - |

|     |        |    |        |   |    |          |          |   |            |     |          |   |    |    |    |    |       |     |   |   |   |   |   |   |     |     |   |   |
|-----|--------|----|--------|---|----|----------|----------|---|------------|-----|----------|---|----|----|----|----|-------|-----|---|---|---|---|---|---|-----|-----|---|---|
| 112 | 8207 * | 47 | Male   | 1 | I  | Normal   | Absence  | 1 | Nasal      | 20% | Normal   | - | 42 | 0  | 42 | 0  | CT+RT | WES | + | + | + | + | + | + | -   | +/- | - | - |
| 113 | 8212 * | 45 | Male   | 1 | I  | Elevated | Absence  | 2 | Liver      | 80% | NA       | - | NA | NA | NA | NA | CT+RT | WES | + | + | + | + | + | + | -   | +   | - | + |
| 114 | 8213 * | 59 | Male   | 1 | II | Normal   | Absence  | 1 | Nasal      | 60% | Normal   | - | NA | NA | NA | NA | CT+RT | WES | + | + | + | + | + | + | -   | -   | - | - |
| 115 | 8215 * | 60 | Male   | 0 | II | Normal   | Absence  | 2 | Nasal      | 70% | Normal   | - | NA | NA | NA | NA | CT+RT | WES | + | + | + | + | + | + | -   | -   | - | - |
| 116 | 8216 * | 55 | Male   | 1 | I  | Elevated | Presence | 2 | Nasal      | 70% | Elevated | - | NA | NA | NA | NA | CT    | WES | + | + | + | + | + | + | -   | -   | - | - |
| 117 | 8218 * | 60 | Female | 1 | II | Normal   | Absence  | 1 | Nasal      | 20% | Elevated | - | NA | NA | NA | NA | CT+RT | WES | + | + | + | + | + | + | -   | -   | - | + |
| 118 | 8222 * | 61 | Male   | 0 | I  | Normal   | Absence  | 1 | Lymph node | 80% | NA       | - | 48 | 0  | 48 | 0  | CT    | WES | + | + | + | + | + | + | +/- | -   | - | - |
| 119 | 8223 * | 45 | Female | 2 | II | Normal   | Presence | 1 | Nasal      | 70% | Normal   | - | NA | NA | NA | NA | CT    | WES | + | + | + | + | + | + | -   | -   | - | - |
| 120 | 8224 * | 29 | Male   | 0 | IV | Elevated | Absence  | 3 | skin       | 40% | NA       | - | 12 | 1  | 12 | 1  | CT+RT | WES | + | + | + | + | + | - | -   | -   | - | + |
| 121 | 8225 * | 43 | Male   | 0 | II | Normal   | Absence  | 0 | Nasal      | 80% | NA       | + | NA | NA | NA | NA | CT    | WES | + | + | + | + | + | + | -   | -   | - | + |
| 122 | 9629 * | 57 | Male   | 1 | II | Normal   | Presence | 1 | Nasal      | 40% | Normal   | - | NA | NA | NA | NA | CT    | WES | + | + | + | + | + | + | -   | -   | - | - |
| 123 | 9612 * | 58 | Male   | 0 | I  | Normal   | Absence  | 1 | Nasal      | 70% | Normal   | - | 55 | 0  | 55 | 0  | CT    | WES | + | + | + | + | + | + | -   | +   | - | - |
| 124 | 9631 * | 52 | Male   | 1 | I  | Normal   | Absence  | 0 | Nasal      | 80% | Normal   | - | NA | NA | NA | NA | RT    | WES | + | + | + | + | - | - | -   | -   | - | - |
| 125 | 143 *  | 24 | Male   | 1 | II | Normal   | Absence  | 0 | Nasal      | 70% | Elevated | - | NA | NA | NA | NA | CT+RT | WES | + | + | + | + | + | + | -   | +/- | - | + |
| 126 | 145 *  | 62 | Female | 2 | IV | Elevated | Absence  | 4 | Nasal      | 90% | Normal   | - | NA | NA | NA | NA | CT    | WES | + | + | + | + | + | + | +   | -   | - | - |
| 127 | 3334 * | 33 | Male   | 1 | I  | Normal   | Absence  | 0 | Nasal      | 70% | Normal   | - | NA | NA | NA | NA | RT    | WES | + | + | + | + | + | + | -   | -   | - | - |

Abbreviations: Serum LDH, Serum lactate dehydrogenase; ECOG PS, Eastern Cooperative Oncology Group performance status; IPI, International Prognostic Index;

CT, Chemotherapy; RT, Radiotherapy; WES, Whole exome sequencing; TS, Target sequencing. \*, Samples without matched normal tissue;

EBER, Epstein-Barr virus (EBV)-encoded small RNAs.



Supplementary Table 2. Summary of whole-exome sequencing data of the 28 cases of NKTCL.

| Patient ID* | Average sequencing depth on target | Coverage of target region** | Fraction of target covered with at least 20× | Fraction of target covered with at least 10× |
|-------------|------------------------------------|-----------------------------|----------------------------------------------|----------------------------------------------|
| 149         | 104.09                             | 98.70%                      | 94.00%                                       | 96.70%                                       |
| 151         | 81.89                              | 98.80%                      | 94.10%                                       | 97.10%                                       |
| 3324        | 64.94                              | 99.40%                      | 92.70%                                       | 97.40%                                       |
| 3325        | 67.47                              | 99.30%                      | 93.70%                                       | 97.60%                                       |
| 3326        | 43.42                              | 99.50%                      | 80.00%                                       | 94.60%                                       |
| 3327        | 45.1                               | 99.20%                      | 83.40%                                       | 94.80%                                       |
| 3329        | 64.29                              | 99.50%                      | 91.20%                                       | 97.20%                                       |
| 3336        | 69.78                              | 99.60%                      | 92.50%                                       | 97.70%                                       |
| 3337        | 93.78                              | 96.90%                      | 64.10%                                       | 76.40%                                       |
| 8184        | 132.07                             | 99.70%                      | 94.30%                                       | 97.90%                                       |
| 8186        | 111.53                             | 99.60%                      | 95.40%                                       | 98.20%                                       |
| 8188        | 126.94                             | 99.70%                      | 96.00%                                       | 98.70%                                       |
| 8191        | 110.72                             | 99.60%                      | 94.10%                                       | 97.70%                                       |
| 8194        | 75.18                              | 99.60%                      | 92.10%                                       | 97.30%                                       |
| 8198        | 70.54                              | 99.60%                      | 90.00%                                       | 96.70%                                       |
| 8199        | 69.89                              | 99.70%                      | 92.40%                                       | 97.70%                                       |
| 8208        | 124.09                             | 99.70%                      | 95.70%                                       | 98.50%                                       |
| 8210        | 97.68                              | 99.60%                      | 95.10%                                       | 98.10%                                       |
| 8219        | 195.53                             | 99.80%                      | 96.70%                                       | 99.00%                                       |
| 8221        | 148.05                             | 99.60%                      | 97.20%                                       | 98.70%                                       |
| 8751        | 90.78                              | 99.50%                      | 91.10%                                       | 96.70%                                       |
| 9616        | 80.13                              | 99.60%                      | 90.70%                                       | 96.80%                                       |
| 9622        | 62.49                              | 99.40%                      | 88.80%                                       | 96.30%                                       |
| 9623        | 69.33                              | 99.30%                      | 90.70%                                       | 96.60%                                       |
| 9624        | 92.56                              | 99.60%                      | 92.80%                                       | 97.60%                                       |
| 9626        | 95.26                              | 99.40%                      | 93.10%                                       | 97.30%                                       |
| 9634        | 153.9                              | 99.60%                      | 95.20%                                       | 98.30%                                       |
| 9638        | 101.66                             | 99.50%                      | 87.10%                                       | 95.30%                                       |
| N149        | 76.18                              | 99.80%                      | 91.50%                                       | 96.90%                                       |
| N151        | 77.64                              | 99.70%                      | 91.00%                                       | 96.50%                                       |
| N3325       | 70.92                              | 99.60%                      | 90.00%                                       | 96.10%                                       |
| N3326       | 66.53                              | 99.70%                      | 88.70%                                       | 95.70%                                       |
| N3329       | 76.78                              | 99.70%                      | 90.60%                                       | 96.40%                                       |
| N3336       | 76.31                              | 99.70%                      | 91.00%                                       | 96.60%                                       |
| N3337       | 78.44                              | 99.60%                      | 91.20%                                       | 96.40%                                       |
| N9634       | 80.13                              | 99.50%                      | 95.40%                                       | 98.20%                                       |
| N9638       | 68.16                              | 99.50%                      | 93.40%                                       | 97.80%                                       |
| N9622       | 71.45                              | 99.40%                      | 94.40%                                       | 97.80%                                       |
| N8208       | 84.8                               | 99.60%                      | 95.20%                                       | 98.20%                                       |
| N8198       | 82.77                              | 99.50%                      | 95.00%                                       | 98.20%                                       |
| N3324       | 66.75                              | 99.50%                      | 93.00%                                       | 97.70%                                       |
| N3327       | 77.15                              | 99.40%                      | 94.70%                                       | 97.90%                                       |
| N8186       | 67.06                              | 99.30%                      | 93.50%                                       | 97.60%                                       |
| N9616       | 59.33                              | 99.80%                      | 80.40%                                       | 93.60%                                       |
| N8184       | 75.45                              | 99.70%                      | 90.00%                                       | 96.00%                                       |
| N8188       | 76.86                              | 99.70%                      | 91.40%                                       | 96.70%                                       |
| N8191       | 77.31                              | 99.80%                      | 91.40%                                       | 96.80%                                       |
| N8194       | 80.11                              | 99.80%                      | 91.70%                                       | 96.80%                                       |
| N8199       | 75.4                               | 99.70%                      | 90.40%                                       | 96.30%                                       |
| N8210       | 75.72                              | 99.80%                      | 91.10%                                       | 96.70%                                       |

|       |       |        |        |        |
|-------|-------|--------|--------|--------|
| N8219 | 74.7  | 99.80% | 90.90% | 96.50% |
| N8221 | 77.4  | 99.70% | 91.50% | 96.70% |
| N8751 | 76.41 | 99.70% | 91.20% | 96.60% |
| N9623 | 78.1  | 99.70% | 90.70% | 96.30% |
| N9624 | 74.75 | 99.70% | 90.30% | 96.20% |
| N9626 | 75.65 | 99.60% | 91.10% | 96.60% |

---

\*N, normal.

\*\*Based on NCBI human reference genome GRC Build 37 (hg19).

Supplementary Table 3. List of somatic non-silent mutations identified by whole exome sequencing of 28 cases of NKTCL.

| Patient ID | Hugo Symbol        | Entrez Gene Id | Chromosome | Position* | Variant Classification | Reference Allele | Tumor Allele | Variant allele frequency | Protein Change |
|------------|--------------------|----------------|------------|-----------|------------------------|------------------|--------------|--------------------------|----------------|
| 3337       | <i>ABCF2</i>       | 10061          | 7          | 150919617 | Nonsense               | C                | A            | 0.2                      | p.E270X        |
| 3337       | <i>ACTR8</i>       | 93973          | 3          | 53902893  | Splice_Site            | C                | A            | 0.143                    | c.1732-4G>T    |
| 3337       | <i>ADCK2</i>       | 90956          | 7          | 140373434 | Missense               | C                | T            | 0.267                    | p.R102C        |
| 3337       | <i>AGAP5</i>       | 729092         | 10         | 75434752  | Missense               | C                | T            | 0.4                      | p.V556I        |
| 3337       | <i>AHNAK2</i>      | 113146         | 14         | 105414800 | Missense               | C                | A            | 0.333                    | p.V2330L       |
| 3337       | <i>ANAPC7</i>      | 51434          | 12         | 110841410 | Missense               | C                | G            | 0.246                    | p.R42P         |
| 3337       | <i>B4GALT6</i>     | 9331           | 18         | 29205630  | Missense               | T                | C            | 0.263                    | p.T366A        |
| 3337       | <i>BMP2K</i>       | 55589          | 4          | 79793795  | Missense               | C                | A            | 0.25                     | p.Q546K        |
| 3337       | <i>BODIL1</i>      | 259282         | 4          | 13588088  | Missense               | C                | A            | 0.4                      | p.D2789Y       |
| 3337       | <i>CACNAIC</i>     | 775            | 12         | 2224512   | Missense               | G                | A            | 0.208                    | p.A58T         |
| 3337       | <i>CCL23</i>       | 6368           | 17         | 34340828  | Missense               | C                | A            | 0.105                    | p.E69D         |
| 3337       | <i>CHD2</i>        | 1106           | 15         | 93489428  | Missense               | C                | G            | 0.333                    | p.I453M        |
| 3337       | <i>CMYA5</i>       | 202333         | 5          | 79025711  | Missense               | G                | A            | 0.25                     | p.E375K        |
| 3337       | <i>CNTROB</i>      | 116840         | 17         | 7836585   | Missense               | C                | T            | 0.07                     | p.P63L         |
| 3337       | <i>COL5A1</i>      | 1289           | 9          | 137582762 | Missense               | G                | T            | 0.097                    | p.Q38H         |
| 3337       | <i>CSTF2T</i>      | 23283          | 10         | 53457663  | In_Frame_Del           | ATACCTCC         | C            | 0.056                    | p.544_549del   |
| 3337       | <i>CTSG</i>        | 1511           | 14         | 25042898  | Missense               | A                | C            | 0.298                    | p.I238R        |
| 3337       | <i>CTTNBP2</i>     | 83992          | 7          | 117450848 | Missense               | G                | T            | 0.182                    | p.L129M        |
| 3337       | <i>CTU2</i>        | 348180         | 16         | 88779247  | Missense               | C                | A            | 0.049                    | p.A224D        |
| 3337       | <i>DDX60L</i>      | 91351          | 4          | 169353603 | Splice_Site            | C                | A            | 0.4                      | c.1516+3G>T    |
| 3337       | <i>DMC1</i>        | 11144          | 22         | 38917651  | Frame_Shift_Del        | CT               | C            | 0.129                    | p.K305fs       |
| 3337       | <i>DOCK2</i>       | 1794           | 5          | 169412829 | Splice_Site            | C                | A            | 0.167                    | c.2899-3C>A    |
| 3337       | <i>DPYS</i>        | 1807           | 8          | 105456535 | Missense               | T                | C            | 0.088                    | p.Y245C        |
| 3337       | <i>E2F7</i>        | 144455         | 12         | 77423695  | Missense               | C                | A            | 0.278                    | p.R600S        |
| 3337       | <i>EP300</i>       | 2033           | 22         | 41546191  | Missense               | C                | A            | 0.154                    | p.P936T        |
| 3337       | <i>FAM186B</i>     | 84070          | 12         | 49994360  | Nonsense               | C                | A            | 0.068                    | p.E355X        |
| 3337       | <i>FAM209A</i>     | 200232         | 20         | 55100949  | Missense               | C                | A            | 0.111                    | p.F113L        |
| 3337       | <i>FAT4</i>        | 79633          | 4          | 126370253 | Missense               | C                | A            | 0.182                    | p.D2694E       |
| 3337       | <i>FCN3</i>        | 8547           | 1          | 27697158  | Missense               | G                | A            | 0.234                    | p.A196V        |
| 3337       | <i>FOXA1</i>       | 3169           | 14         | 38060721  | Missense               | G                | A            | 0.264                    | p.A423V        |
| 3337       | <i>GNAS</i>        | 2778           | 20         | 57429244  | Missense               | G                | A            | 0.138                    | p.R246H        |
| 3337       | <i>GPAT2</i>       | 150763         | 2          | 96688961  | Missense               | G                | A            | 0.121                    | p.S681L        |
| 3337       | <i>HGC6.3</i>      | 100128124      | 6          | 168377136 | Missense               | T                | G            | 0.176                    | p.Q66P         |
| 3337       | <i>HGC6.3</i>      | 100128124      | 6          | 168377262 | Missense               | T                | G            | 0.091                    | p.Q24P         |
| 3337       | <i>HTR1B</i>       | 3351           | 6          | 78172216  | Missense               | T                | A            | 0.212                    | p.K302M        |
| 3337       | <i>ILI17C</i>      | 27189          | 16         | 88706430  | Missense               | T                | G            | 0.216                    | p.F182V        |
| 3337       | <i>KCNH7</i>       | 90134          | 2          | 163280034 | Missense               | C                | A            | 0.154                    | p.A656S        |
| 3337       | <i>L2HGDH</i>      | 79944          | 14         | 50735942  | Missense               | C                | A            | 0.286                    | p.R282L        |
| 3337       | <i>LHFPL2</i>      | 10184          | 5          | 77784941  | Missense               | C                | A            | 0.133                    | p.A156S        |
| 3337       | <i>MAN2B2</i>      | 23324          | 4          | 6599022   | Missense               | G                | A            | 0.182                    | p.V414I        |
| 3337       | <i>MKLN1</i>       | 4289           | 7          | 131113791 | Splice_Site            | G                | T            | 0.333                    | c.848-1G>T     |
| 3337       | <i>MMEL1</i>       | 79258          | 1          | 2528092   | Missense               | G                | A            | 0.203                    | p.R437C        |
| 3337       | <i>MPL</i>         | 4352           | 1          | 43805690  | Missense               | G                | A            | 0.133                    | p.G249D        |
| 3337       | <i>MUC21</i>       | 394263         | 6          | 30955179  | Missense               | G                | C            | 0.2                      | p.E409D        |
| 3337       | <i>MUC4</i>        | 4585           | 3          | 195501161 | Missense               | G                | A            | 0.226                    | p.P4320L       |
| 3337       | <i>MXRA7</i>       | 439921         | 17         | 74681213  | Missense               | C                | A            | 0.077                    | p.K147N        |
| 3337       | <i>MYH4</i>        | 4622           | 17         | 10363600  | Missense               | C                | A            | 0.133                    | p.A396S        |
| 3337       | <i>NKRF</i>        | 55922          | X          | 118723880 | Missense               | G                | A            | 0.231                    | p.A518V        |
| 3337       | <i>NLRP14</i>      | 338323         | 11         | 7065044   | Missense               | G                | T            | 0.182                    | p.S596I        |
| 3337       | <i>NLRP3</i>       | 114548         | 1          | 247588293 | Missense               | G                | T            | 0.224                    | p.K516N        |
| 3337       | <i>NOS3</i>        | 4846           | 7          | 150698413 | Missense               | C                | A            | 0.2                      | p.A443E        |
| 3337       | <i>NRXN1</i>       | 9378           | 2          | 50847258  | Missense               | G                | T            | 0.154                    | p.L448M        |
| 3337       | <i>OR52M1</i>      | 119772         | 11         | 4566917   | Missense               | G                | A            | 0.212                    | p.R166H        |
| 3337       | <i>PDE4D</i>       | 5144           | 5          | 59189315  | Missense               | C                | A            | 0.137                    | p.Q45H         |
| 3337       | <i>PDZRN3</i>      | 23024          | 3          | 73432601  | Missense               | G                | A            | 0.16                     | p.T1039M       |
| 3337       | <i>POTEE</i>       | 445582         | 2          | 132021629 | Missense               | G                | T            | 0.222                    | p.E867D        |
| 3337       | <i>PRB4</i>        | 5545           | 12         | 11461769  | Missense               | G                | T            | 0.114                    | p.P50T         |
| 3337       | <i>PROB1</i>       | 389333         | 5          | 138727979 | Missense               | G                | A            | 0.064                    | p.T931I        |
| 3337       | <i>PROC</i>        | 5624           | 2          | 128184745 | Missense               | T                | G            | 0.308                    | p.V248G        |
| 3337       | <i>PTHIR</i>       | 5745           | 3          | 46940276  | Missense               | C                | A            | 0.319                    | p.R255S        |
| 3337       | <i>PUS10</i>       | 150962         | 2          | 61180157  | Missense               | T                | C            | 0.5                      | p.D428G        |
| 3337       | <i>RNF125</i>      | 54941          | 18         | 29617143  | Missense               | G                | T            | 0.167                    | p.A77S         |
| 3337       | <i>RNU6-28P</i>    | 100873756      | 15         | 43733730  | Missense               | A                | G            | 0.25                     | p.V1026A       |
| 3337       | <i>RSBNIL</i>      | 222194         | 7          | 77407690  | Missense               | G                | T            | 0.286                    | p.C610F        |
| 3337       | <i>SEPT5-GP1BB</i> | 100526833      | 22         | 19711652  | Missense               | C                | A            | 0.107                    | p.R96S         |
| 3337       | <i>SIGLEC8</i>     | 27181          | 19         | 51961440  | Missense               | G                | A            | 0.229                    | p.R68W         |
| 3337       | <i>SLIT3</i>       | 6586           | 5          | 168093655 | Missense               | C                | T            | 0.157                    | p.R1459H       |
| 3337       | <i>SRRM5</i>       | 100170229      | 19         | 44117884  | Missense               | A                | C            | 0.164                    | p.R537S        |
| 3337       | <i>ST5</i>         | 6764           | 11         | 8752362   | Missense               | C                | T            | 0.167                    | p.A159T        |
| 3337       | <i>STAM</i>        | 8027           | 10         | 17756762  | Nonsense               | C                | T            | 0.245                    | p.Q536X        |
| 3337       | <i>TCFL5</i>       | 10732          | 20         | 61492781  | Missense               | A                | G            | 0.13                     | p.L81P         |
| 3337       | <i>TCN1</i>        | 6947           | 11         | 59620714  | Missense               | T                | C            | 0.222                    | p.Y401C        |
| 3337       | <i>TDG</i>         | 6996           | 12         | 104376700 | Missense               | A                | C            | 0.15                     | p.K201T        |
| 3337       | <i>TIGD2</i>       | 166815         | 4          | 90034606  | Nonsense               | G                | T            | 0.333                    | p.E161X        |

|      |                  |           |    |           |                 |   |    |       |            |
|------|------------------|-----------|----|-----------|-----------------|---|----|-------|------------|
| 3337 | <i>TMEM14B</i>   | 81853     | 6  | 10756728  | Missense        | C | T  | 0.222 | p.R108C    |
| 3337 | <i>USP44</i>     | 84101     | 12 | 95927762  | Missense        | T | C  | 0.167 | p.T91A     |
| 3337 | <i>ZBTB7C</i>    | 201501    | 18 | 45567049  | Missense        | C | T  | 0.174 | p.D144N    |
| 3337 | <i>ZFHX2</i>     | 85446     | 14 | 23996919  | Missense        | C | T  | 0.239 | p.R1010K   |
| 3336 | <i>ANKRD22</i>   | 118932    | 10 | 90591731  | Missense        | A | C  | 0.55  | p.V25G     |
| 3336 | <i>ARID3A</i>    | 1820      | 19 | 965056    | Missense        | A | C  | 0.444 | p.T392P    |
| 3336 | <i>ASB18</i>     | 401036    | 2  | 237149941 | Missense        | C | T  | 0.052 | p.A104T    |
| 3336 | <i>BCAS1</i>     | 8537      | 20 | 52645166  | Missense        | A | G  | 0.043 | p.V163A    |
| 3336 | <i>CADM2</i>     | 253559    | 3  | 85961603  | Missense        | A | G  | 0.328 | p.S87G     |
| 3336 | <i>CASP8</i>     | 841       | 2  | 202134279 | Nonsense        | C | T  | 0.29  | p.Q118X    |
| 3336 | <i>CES2</i>      | 8824      | 16 | 66969362  | Missense        | C | T  | 0.05  | p.R6C      |
| 3336 | <i>CLIC6</i>     | 54102     | 21 | 36042964  | Missense        | G | C  | 0.328 | p.S426T    |
| 3336 | <i>COPS3</i>     | 8533      | 17 | 17179481  | Splice_Site     | G | A  | 0.077 | c.56-3C>T  |
| 3336 | <i>CYP4A11</i>   | 1579      | 1  | 47395874  | Missense        | A | C  | 0.136 | p.I491M    |
| 3336 | <i>DENND4C</i>   | 55667     | 9  | 19346689  | Nonsense        | G | T  | 0.134 | p.E1259X   |
| 3336 | <i>DHRS4L1</i>   | 728635    | 14 | 24520160  | Missense        | A | C  | 0.474 | p.T146P    |
| 3336 | <i>E2F7</i>      | 144455    | 12 | 77436967  | Missense        | C | T  | 0.067 | p.R334H    |
| 3336 | <i>EMC2</i>      | 9694      | 8  | 109488176 | Missense        | G | A  | 0.154 | p.C192Y    |
| 3336 | <i>FCGBP</i>     | 8857      | 19 | 40373950  | Missense        | G | T  | 0.154 | p.T4043N   |
| 3336 | <i>FRY</i>       | 10129     | 13 | 32709038  | Splice_Site     | C | A  | 0.25  | c.886-3C>A |
| 3336 | <i>FSIP2</i>     | 401024    | 2  | 186667513 | Frame_Shift_Ins | C | CA | 0.208 | p.Q4583fs  |
| 3336 | <i>HLA-B</i>     | 3106      | 6  | 31323238  | Missense        | C | T  | 0.348 | p.D251N    |
| 3336 | <i>HMCN1</i>     | 83872     | 1  | 185964204 | Missense        | A | C  | 0.24  | p.T1255P   |
| 3336 | <i>HRNR</i>      | 388697    | 1  | 152192396 | Missense        | C | T  | 0.5   | p.S570N    |
| 3336 | <i>LPCAT2</i>    | 54947     | 16 | 55562466  | Missense        | G | A  | 0.06  | p.M163I    |
| 3336 | <i>MUC4</i>      | 4585      | 3  | 195497174 | Missense        | C | G  | 0.057 | p.M4437I   |
| 3336 | <i>MUC7</i>      | 4589      | 4  | 71347240  | Missense        | T | C  | 0.177 | p.V260A    |
| 3336 | <i>MYOM2</i>     | 9172      | 8  | 2092748   | Missense        | G | A  | 0.269 | p.G1414D   |
| 3336 | <i>NAALADL2</i>  | 254827    | 3  | 174814755 | Missense        | C | A  | 0.262 | p.N73K     |
| 3336 | <i>NEO1</i>      | 4756      | 15 | 73590698  | Missense        | G | A  | 0.165 | p.R1304Q   |
| 3336 | <i>NOTCH1</i>    | 4851      | 9  | 139409115 | Missense        | T | G  | 0.071 | p.N685T    |
| 3336 | <i>OR4A15</i>    | 81328     | 11 | 55135435  | Missense        | C | T  | 0.055 | p.P26S     |
| 3336 | <i>PCNXL4</i>    | 64430     | 14 | 60582053  | Missense        | G | A  | 0.043 | p.V177I    |
| 3336 | <i>PDGFRB</i>    | 5159      | 5  | 149500554 | Missense        | G | A  | 0.355 | p.A828V    |
| 3336 | <i>PKHD1</i>     | 5314      | 6  | 51889653  | Missense        | T | C  | 0.299 | p.Y1652C   |
| 3336 | <i>PLEKHN1</i>   | 84069     | 1  | 907758    | Missense        | A | G  | 0.214 | p.E319G    |
| 3336 | <i>PRG4</i>      | 10216     | 1  | 186276052 | Missense        | A | C  | 0.333 | p.T401P    |
| 3336 | <i>QRICH1</i>    | 54870     | 3  | 49084547  | Missense        | C | A  | 0.182 | p.A491S    |
| 3336 | <i>RRP7A</i>     | 27341     | 22 | 42910199  | Missense        | G | A  | 0.152 | p.R224W    |
| 3336 | <i>RSPO4</i>     | 343637    | 20 | 941023    | Missense        | G | A  | 0.341 | p.R228C    |
| 3336 | <i>SLC30A1</i>   | 7779      | 1  | 211751948 | Missense        | A | C  | 0.281 | p.C3G      |
| 3336 | <i>SLU7</i>      | 10569     | 5  | 159835658 | Missense        | A | G  | 0.083 | p.M229T    |
| 3336 | <i>SORL1</i>     | 6653      | 11 | 121458827 | Missense        | G | A  | 0.237 | p.G1305R   |
| 3336 | <i>SPTA1</i>     | 6708      | 1  | 158585142 | Missense        | C | T  | 0.141 | p.D2218N   |
| 3336 | <i>STAT3</i>     | 6774      | 17 | 40486030  | Missense        | G | T  | 0.357 | p.Q279K    |
| 3336 | <i>SYNJ2</i>     | 8871      | 6  | 158497754 | Missense        | A | C  | 0.48  | p.T797P    |
| 3336 | <i>TIGD2</i>     | 166815    | 4  | 90035549  | Missense        | A | G  | 0.061 | p.H475R    |
| 3336 | <i>TTN-AS1</i>   | 100506866 | 2  | 179456054 | Nonsense        | G | C  | 0.07  | p.S20133X  |
| 3336 | <i>VAX1</i>      | 11023     | 10 | 118897494 | Missense        | G | C  | 0.333 | p.A25G     |
| 3336 | <i>WWC1</i>      | 23286     | 5  | 167798475 | Missense        | C | T  | 0.221 | p.P56S     |
| 3336 | <i>ZBTB42</i>    | 100128927 | 14 | 105267770 | Missense        | T | A  | 0.313 | p.L79Q     |
| 3336 | <i>ZNF444</i>    | 55311     | 19 | 56669869  | Missense        | G | A  | 0.188 | p.A102T    |
| 3336 | <i>ZNF596</i>    | 169270    | 8  | 196274    | Missense        | T | G  | 0.091 | p.V476G    |
| 3336 | <i>ZSCAN1</i>    | 284312    | 19 | 58565342  | Missense        | G | A  | 0.367 | p.V384I    |
| 3329 | <i>ABLM3</i>     | 22885     | 5  | 148619355 | Missense        | C | T  | 0.096 | p.R370W    |
| 3329 | <i>ACSM6</i>     | 142827    | 10 | 96985105  | Missense        | G | A  | 0.133 | p.R420H    |
| 3329 | <i>ACTRT2</i>    | 140625    | 1  | 2938807   | Missense        | G | A  | 0.107 | p.G186D    |
| 3329 | <i>AFF3</i>      | 3899      | 2  | 100199429 | Frame_Shift_Ins | A | AT | 0.147 | p.M875fs   |
| 3329 | <i>AGER</i>      | 177       | 6  | 32151050  | Splice_Site     | C | T  | 0.066 | c.468+3G>A |
| 3329 | <i>ANKRD50</i>   | 57182     | 4  | 125591596 | Missense        | C | A  | 0.09  | p.G946C    |
| 3329 | <i>ARHGEF10</i>  | 9639      | 8  | 1791593   | Missense        | G | A  | 0.25  | p.A10T     |
| 3329 | <i>BAI3</i>      | 577       | 6  | 70071146  | Missense        | A | T  | 0.087 | p.K1327N   |
| 3329 | <i>BCL9L</i>     | 283149    | 11 | 118770860 | Missense        | C | T  | 0.222 | p.A1058T   |
| 3329 | <i>BEND2</i>     | 139105    | X  | 18230715  | Missense        | A | C  | 0.136 | p.F154L    |
| 3329 | <i>BNIP3</i>     | 664       | 10 | 133787327 | Missense        | C | T  | 0.5   | p.R56Q     |
| 3329 | <i>CI5orf43</i>  | 145645    | 15 | 45253735  | Missense        | A | T  | 0.139 | p.I101F    |
| 3329 | <i>C20orf144</i> | 128864    | 20 | 32251404  | Missense        | G | C  | 0.061 | p.D65H     |
| 3329 | <i>CCDC50</i>    | 152137    | 3  | 191093310 | Missense        | A | G  | 0.073 | p.K303R    |
| 3329 | <i>CCDC73</i>    | 493860    | 11 | 32676427  | Missense        | T | C  | 0.267 | p.E246G    |
| 3329 | <i>CDH3</i>      | 1001      | 16 | 68713829  | Missense        | C | A  | 0.118 | p.H273Q    |
| 3329 | <i>CLCNKA</i>    | 1187      | 1  | 16357022  | Missense        | C | T  | 0.167 | p.T492I    |
| 3329 | <i>DHRS4L1</i>   | 728635    | 14 | 24520160  | Missense        | A | C  | 0.615 | p.T146P    |
| 3329 | <i>DICER1</i>    | 23405     | 14 | 95569720  | Missense        | G | A  | 0.07  | p.A1338V   |
| 3329 | <i>DMGDH</i>     | 29958     | 5  | 78326750  | Missense        | G | A  | 0.143 | p.A530V    |
| 3329 | <i>ENAH</i>      | 55740     | 1  | 225707016 | Missense        | C | A  | 0.103 | p.R229I    |
| 3329 | <i>FAM205A</i>   | 259308    | 9  | 34723988  | Missense        | C | A  | 0.4   | p.R1083S   |
| 3329 | <i>FCHSD2</i>    | 9873      | 11 | 72712136  | Nonsense        | G | A  | 0.077 | p.Q96X     |
| 3329 | <i>FKBP15</i>    | 23307     | 9  | 115936793 | Missense        | C | T  | 0.071 | p.R765H    |
| 3329 | <i>GHSR</i>      | 2693      | 3  | 172163018 | Missense        | T | C  | 0.154 | p.Q345R    |
| 3329 | <i>GPR179</i>    | 440435    | 17 | 36483837  | Missense        | G | A  | 0.096 | p.T1872I   |

|      |                     |           |    |           |                 |        |       |       |             |
|------|---------------------|-----------|----|-----------|-----------------|--------|-------|-------|-------------|
| 3329 | <i>HARS2</i>        | 23438     | 5  | 140076953 | Missense        | G      | A     | 0.099 | p.V387I     |
| 3329 | <i>HSPG2</i>        | 3339      | 1  | 22213759  | Missense        | G      | A     | 0.07  | p.R343C     |
| 3329 | <i>IGFNI</i>        | 91156     | 1  | 201175274 | Missense        | A      | G     | 0.091 | p.Q418R     |
| 3329 | <i>IKZF1</i>        | 10320     | 7  | 50450292  | Missense        | A      | G     | 0.062 | p.N159S     |
| 3329 | <i>IL22RA1</i>      | 58985     | 1  | 24447468  | Missense        | G      | C     | 0.077 | p.R518G     |
| 3329 | <i>JAKMIP2</i>      | 9832      | 5  | 147040551 | Missense        | G      | A     | 0.3   | p.S196L     |
| 3329 | <i>JMJD1C</i>       | 221037    | 10 | 65140170  | Missense        | A      | C     | 0.095 | p.F81V      |
| 3329 | <i>KCNIP1</i>       | 30820     | 5  | 170148846 | Missense        | C      | T     | 0.06  | p.T61M      |
| 3329 | <i>KCNT1</i>        | 57582     | 9  | 138662241 | Missense        | C      | T     | 0.074 | p.R573C     |
| 3329 | <i>KIAA1683</i>     | 80726     | 19 | 18377496  | Missense        | C      | G     | 0.045 | p.S285T     |
| 3329 | <i>KRT38</i>        | 8687      | 17 | 39595484  | Nonsense        | G      | A     | 0.225 | p.Q235X     |
| 3329 | <i>KRTAP4-9</i>     | 100132386 | 17 | 39262047  | Missense        | A      | G     | 0.25  | p.K136R     |
| 3329 | <i>.OC10050705:</i> | 100507053 | 4  | 100134863 | Missense        | C      | A     | 0.153 | p.L54F      |
| 3329 | <i>MAGEC1</i>       | 9947      | X  | 140993875 | Missense        | G      | C     | 0.5   | p.A229P     |
| 3329 | <i>MDGA2</i>        | 161357    | 14 | 47566315  | Missense        | T      | C     | 0.116 | p.I15V      |
| 3329 | <i>MRGPRX1</i>      | 259249    | 11 | 18956196  | Missense        | C      | T     | 0.125 | p.A46T      |
| 3329 | <i>MUC16</i>        | 94025     | 19 | 9058907   | Missense        | G      | C     | 0.078 | p.H9513Q    |
| 3329 | <i>MUC16</i>        | 94025     | 19 | 9076083   | Missense        | G      | A     | 0.069 | p.T3788I    |
| 3329 | <i>MYO15A</i>       | 51168     | 17 | 18069672  | Splice_Site     | C      | A     | 0.2   | c.9788-3C>A |
| 3329 | <i>NDST1</i>        | 3340      | 5  | 149924975 | Missense        | C      | A     | 0.075 | p.A691E     |
| 3329 | <i>NOTCH2</i>       | 4853      | 1  | 120539668 | Missense        | T      | A     | 0.75  | p.T235S     |
| 3329 | <i>ORIS2</i>        | 219958    | 11 | 57970830  | Missense        | G      | A     | 0.111 | p.P275L     |
| 3329 | <i>OR52E6</i>       | 390078    | 11 | 5862984   | Missense        | G      | C     | 0.071 | p.F48L      |
| 3329 | <i>OR56A1</i>       | 120796    | 11 | 6048642   | Missense        | G      | A     | 0.133 | p.S98L      |
| 3329 | <i>PABPC1</i>       | 26986     | 8  | 101724606 | Missense        | G      | A     | 0.118 | p.T319I     |
| 3329 | <i>PABPC1L</i>      | 80336     | 20 | 43561710  | Splice_Site     | C      | T     | 0.107 | c.1331-3C>T |
| 3329 | <i>PCDHA11</i>      | 56138     | 5  | 140249266 | Missense        | C      | T     | 0.088 | p.S193L     |
| 3329 | <i>PCDHA9</i>       | 9752      | 5  | 140263778 | Missense        | C      | T     | 0.092 | p.A642V     |
| 3329 | <i>PLAT</i>         | 5327      | 8  | 42045064  | Missense        | G      | T     | 0.136 | p.Q131K     |
| 3329 | <i>PLCB3</i>        | 5331      | 11 | 64029509  | Missense        | G      | A     | 0.082 | p.V667I     |
| 3329 | <i>POM121L12</i>    | 285877    | 7  | 53104193  | Missense        | A      | T     | 0.075 | p.S277C     |
| 3329 | <i>PPP1R26</i>      | 9858      | 9  | 138378218 | Missense        | C      | T     | 0.091 | p.A621V     |
| 3329 | <i>PRRC2A</i>       | 7916      | 6  | 31604011  | Missense        | G      | A     | 0.052 | p.G1884S    |
| 3329 | <i>RPL11</i>        | 94137     | 8  | 10468172  | Missense        | G      | A     | 0.069 | p.R1146W    |
| 3329 | <i>SLC15A1</i>      | 6564      | 13 | 99358482  | Missense        | C      | A     | 0.118 | p.G392V     |
| 3329 | <i>SORL1</i>        | 6653      | 11 | 121403182 | Missense        | G      | A     | 0.111 | p.G536R     |
| 3329 | <i>STC1</i>         | 6781      | 8  | 23709782  | Missense        | C      | A     | 0.105 | p.L78F      |
| 3329 | <i>SUDS3</i>        | 64426     | 12 | 118852225 | Missense        | G      | A     | 0.133 | p.R325H     |
| 3329 | <i>TACC2</i>        | 10579     | 10 | 123989927 | Missense        | T      | G     | 0.061 | p.L2700W    |
| 3329 | <i>TGS1</i>         | 96764     | 8  | 56705333  | Missense        | T      | A     | 0.146 | p.S453T     |
| 3329 | <i>TMEM121</i>      | 80757     | 14 | 105995790 | Missense        | G      | A     | 0.143 | p.E207K     |
| 3329 | <i>TMEM63C</i>      | 57156     | 14 | 77706020  | Missense        | A      | C     | 0.292 | p.H294P     |
| 3329 | <i>TRIOBP</i>       | 11078     | 22 | 38121152  | Missense        | C      | A     | 0.062 | p.N863K     |
| 3329 | <i>TSSK2</i>        | 23617     | 22 | 19119751  | Missense        | C      | T     | 0.064 | p.T280M     |
| 3329 | <i>TUBD1</i>        | 51174     | 17 | 57963537  | Missense        | A      | G     | 0.182 | p.M76T      |
| 3329 | <i>UBR7</i>         | 55148     | 14 | 93684890  | Nonsense        | G      | T     | 0.154 | p.E207X     |
| 3329 | <i>USH2A</i>        | 7399      | 1  | 215960153 | Missense        | A      | C     | 0.304 | p.C3416G    |
| 3329 | <i>WDR43</i>        | 23160     | 2  | 29150552  | Missense        | T      | G     | 0.178 | p.S431A     |
| 3329 | <i>WDR59</i>        | 79726     | 16 | 74926444  | Nonsense        | G      | A     | 0.167 | p.Q674X     |
| 3329 | <i>YEATS2</i>       | 55689     | 3  | 183474408 | Missense        | A      | G     | 0.178 | p.L495V     |
| 3329 | <i>ZMAT1</i>        | 84460     | X  | 101139254 | Missense        | G      | T     | 0.15  | p.P211Q     |
| 3329 | <i>ZNF335</i>       | 63925     | 20 | 44596429  | Missense        | C      | T     | 0.125 | p.R253Q     |
| 3329 | <i>ZNF83</i>        | 55769     | 19 | 53117469  | Missense        | T      | C     | 0.075 | p.K117E     |
| 3327 | <i>ABCC8</i>        | 6833      | 11 | 17414592  | Missense        | C      | A     | 0.192 | p.K1565N    |
| 3327 | <i>ABCG1</i>        | 9619      | 21 | 43710302  | Missense        | C      | T     | 0.105 | p.A434V     |
| 3327 | <i>ACAN</i>         | 176       | 15 | 89392960  | Missense        | G      | A     | 0.048 | p.R675Q     |
| 3327 | <i>ACSBG1</i>       | 23205     | 15 | 78466127  | Missense        | T      | C     | 0.075 | p.M633V     |
| 3327 | <i>ACTB</i>         | 60        | 7  | 5568970   | Missense        | C      | A     | 0.111 | p.R62I      |
| 3327 | <i>AIMIL</i>        | 55057     | 1  | 26673108  | Missense        | C      | T     | 0.079 | p.R14Q      |
| 3327 | <i>APC2</i>         | 10297     | 19 | 1453137   | Missense        | T      | C     | 0.35  | p.M46T      |
| 3327 | <i>ARPP21</i>       | 10777     | 3  | 35779794  | Missense        | C      | T     | 0.184 | p.T544M     |
| 3327 | <i>ATRX</i>         | 546       | X  | 76931736  | Missense        | T      | C     | 0.133 | p.N1265S    |
| 3327 | <i>ATXN7L1</i>      | 222255    | 7  | 105254613 | Missense        | G      | A     | 0.257 | p.P723L     |
| 3327 | <i>BALAP2</i>       | 10458     | 17 | 79082271  | Splice_Site     | C      | T     | 0.176 | c.1501-4C>T |
| 3327 | <i>BCYRN1</i>       | 618       | X  | 70837255  | Frame_Shift_Del | AGTTCT | A     | 0.167 | p.E21fs     |
| 3327 | <i>BCYRN1</i>       | 618       | X  | 70837252  | Frame_Shift_Ins | T      | TGAAA | 0.158 | p.S24fs     |
| 3327 | <i>CCDC116</i>      | 164592    | 22 | 21988599  | Missense        | G      | A     | 0.094 | p.G121R     |
| 3327 | <i>CCT4</i>         | 10575     | 2  | 62099221  | Missense        | C      | T     | 0.167 | p.R496Q     |
| 3327 | <i>CDH9</i>         | 1007      | 5  | 26988328  | Missense        | G      | A     | 0.087 | p.A38V      |
| 3327 | <i>CEP192</i>       | 55125     | 18 | 13056682  | Missense        | G      | A     | 0.154 | p.V1365M    |
| 3327 | <i>CEP55</i>        | 55165     | 10 | 95276742  | Missense        | G      | C     | 0.103 | p.A244P     |
| 3327 | <i>CFAP46</i>       | 54777     | 10 | 134646913 | Nonsense        | G      | A     | 0.133 | p.R2356X    |
| 3327 | <i>CLASP1</i>       | 23332     | 2  | 122218726 | Missense        | C      | T     | 0.095 | p.R328K     |
| 3327 | <i>CLOCK</i>        | 9575      | 4  | 56314986  | Missense        | G      | A     | 0.091 | p.S500F     |
| 3327 | <i>CMYA5</i>        | 202333    | 5  | 79026773  | Missense        | T      | C     | 0.231 | p.Y729H     |
| 3327 | <i>CNST</i>         | 163882    | 1  | 246784733 | Missense        | C      | A     | 0.333 | p.L128I     |
| 3327 | <i>COL4A2</i>       | 1284      | 13 | 111145633 | Splice_Site     | C      | T     | 0.111 | c.3634+4C>T |
| 3327 | <i>CPN1</i>         | 1369      | 10 | 101835685 | Missense        | C      | T     | 0.2   | p.E135K     |
| 3327 | <i>CXorf67</i>      | 340602    | X  | 51150445  | Missense        | A      | C     | 0.296 | p.S193R     |
| 3327 | <i>DES</i>          | 1674      | 2  | 220283420 | Missense        | C      | T     | 0.304 | p.T79M      |

|      |                     |           |    |           |              |      |   |       |              |
|------|---------------------|-----------|----|-----------|--------------|------|---|-------|--------------|
| 3327 | <i>DFFA</i>         | 1676      | 1  | 10532419  | Missense     | C    | A | 0.343 | p.G33C       |
| 3327 | <i>DHX58</i>        | 79132     | 17 | 40262767  | Missense     | C    | T | 0.222 | p.D179N      |
| 3327 | <i>DIAPH3</i>       | 81624     | 13 | 60544092  | Missense     | C    | A | 0.133 | p.C687F      |
| 3327 | <i>EFS</i>          | 10278     | 14 | 23829242  | Missense     | C    | T | 0.138 | p.D149N      |
| 3327 | <i>ETV1</i>         | 2115      | 7  | 13940418  | Missense     | T    | G | 0.143 | p.Y386S      |
| 3327 | <i>EVC2</i>         | 132884    | 4  | 5690902   | Missense     | T    | C | 0.07  | p.S230G      |
| 3327 | <i>EXOC3L4</i>      | 91828     | 14 | 103566731 | Missense     | C    | T | 0.167 | p.R59W       |
| 3327 | <i>FAM186B</i>      | 84070     | 12 | 49994472  | Missense     | C    | A | 0.216 | p.Q317H      |
| 3327 | <i>FAM47C</i>       | 442444    | X  | 37026830  | Missense     | C    | T | 0.667 | p.A116V      |
| 3327 | <i>FBXO32</i>       | 114907    | 8  | 124518679 | Missense     | G    | A | 0.4   | p.R263W      |
| 3327 | <i>FGF2</i>         | 2247      | 4  | 123814308 | Missense     | C    | T | 0.048 | p.R40Q       |
| 3327 | <i>FOXP1</i>        | 27086     | 3  | 71008447  | Missense     | T    | A | 0.148 | p.D662V      |
| 3327 | <i>FRY</i>          | 10129     | 13 | 32676096  | Splice_Site  | C    | T | 0.111 | c.271-4C>T   |
| 3327 | <i>FSLP2</i>        | 401024    | 2  | 186667115 | Missense     | C    | T | 0.082 | p.A4450V     |
| 3327 | <i>GAREM</i>        | 64762     | 18 | 29848570  | Missense     | C    | T | 0.119 | p.G631E      |
| 3327 | <i>GOLGA2</i>       | 2801      | 9  | 131019738 | Missense     | T    | C | 0.143 | p.R902G      |
| 3327 | <i>GPRIN1</i>       | 114787    | 5  | 176026795 | Missense     | T    | C | 0.231 | p.Q14R       |
| 3327 | <i>HABP2</i>        | 3026      | 10 | 115341758 | Missense     | C    | T | 0.188 | p.T321M      |
| 3327 | <i>HAS2</i>         | 3037      | 8  | 122641081 | Missense     | C    | A | 0.098 | p.S167I      |
| 3327 | <i>HMHA1</i>        | 23526     | 19 | 1068738   | Missense     | G    | A | 0.062 | p.R139H      |
| 3327 | <i>HPD</i>          | 3242      | 12 | 122285073 | Missense     | G    | T | 0.262 | p.T176K      |
| 3327 | <i>HRNR</i>         | 388697    | 1  | 152193944 | Missense     | A    | T | 0.286 | p.V54E       |
| 3327 | <i>ICAM5</i>        | 7087      | 19 | 10403368  | Missense     | G    | A | 0.143 | p.A348T      |
| 3327 | <i>IGFLR1</i>       | 79713     | 19 | 36231312  | Missense     | C    | G | 0.273 | p.G104A      |
| 3327 | <i>ITGAE</i>        | 3682      | 17 | 3628212   | Missense     | T    | C | 0.087 | p.I328T      |
| 3327 | <i>KCNV2</i>        | 169522    | 9  | 2718209   | Missense     | T    | C | 0.161 | p.V157A      |
| 3327 | <i>KIAA1467</i>     | 57613     | 12 | 13220112  | Missense     | C    | T | 0.114 | p.R342W      |
| 3327 | <i>KIF5C</i>        | 3800      | 2  | 149866665 | Missense     | C    | T | 0.258 | p.A856V      |
| 3327 | <i>KIRREL3</i>      | 84623     | 11 | 126396493 | Missense     | C    | T | 0.097 | p.D75N       |
| 3327 | <i>KLHL30</i>       | 377007    | 2  | 239049642 | Missense     | G    | A | 0.231 | p.V83M       |
| 3327 | <i>KLHL40</i>       | 131377    | 3  | 42729655  | Missense     | T    | A | 0.333 | p.W392R      |
| 3327 | <i>LAMA5</i>        | 3911      | 20 | 60898710  | Missense     | A    | G | 0.2   | p.F1956L     |
| 3327 | <i>LIN7A</i>        | 8825      | 12 | 81205289  | Missense     | C    | A | 0.107 | p.Q219H      |
| 3327 | <i>.OC10192776:</i> | 101927765 | 1  | 234509259 | Missense     | G    | C | 0.1   | p.S16T       |
| 3327 | <i>LRP6</i>         | 4040      | 12 | 12283719  | Missense     | C    | T | 0.154 | p.C1360Y     |
| 3327 | <i>LSM10</i>        | 84967     | 1  | 36859418  | Nonsense     | G    | A | 0.138 | p.R105X      |
| 3327 | <i>MCM8</i>         | 84515     | 20 | 5935790   | Missense     | G    | A | 0.1   | p.E127K      |
| 3327 | <i>MMP26</i>        | 56547     | 11 | 5013190   | Splice_Site  | T    | C | 0.222 | c.596-4T>C   |
| 3327 | <i>MRPL12</i>       | 6182      | 17 | 79674250  | Missense     | G    | A | 0.25  | p.G193S      |
| 3327 | <i>MS4A14</i>       | 84689     | 11 | 60184191  | Missense     | G    | A | 0.094 | p.G617R      |
| 3327 | <i>MSN</i>          | 4478      | X  | 64953045  | Splice_Site  | G    | A | 0.273 | c.699-1G>A   |
| 3327 | <i>MUC5B</i>        | 727897    | 11 | 1260149   | Missense     | T    | C | 0.188 | p.C1116R     |
| 3327 | <i>MYO7A</i>        | 4647      | 11 | 76924915  | Missense     | C    | A | 0.227 | p.T2110N     |
| 3327 | <i>NALCN</i>        | 259232    | 13 | 102029124 | Missense     | G    | T | 0.094 | p.L191I      |
| 3327 | <i>NAV3</i>         | 89795     | 12 | 78574732  | Missense     | T    | C | 0.138 | p.S1867P     |
| 3327 | <i>NOV</i>          | 4856      | 8  | 120428860 | Splice_Site  | A    | G | 0.16  | c.84+4A>G    |
| 3327 | <i>NSD1</i>         | 64324     | 5  | 176710863 | Missense     | A    | G | 0.176 | p.T1760A     |
| 3327 | <i>OR4N5</i>        | 390437    | 14 | 20612441  | Nonsense     | C    | T | 0.151 | p.Q183X      |
| 3327 | <i>OR5D18</i>       | 219438    | 11 | 55587715  | Missense     | G    | A | 0.132 | p.A204T      |
| 3327 | <i>PCDHB2</i>       | 56133     | 5  | 140475658 | Missense     | C    | G | 0.136 | p.F428L      |
| 3327 | <i>PCOLCE2</i>      | 26577     | 3  | 142567248 | Missense     | G    | A | 0.142 | p.R87C       |
| 3327 | <i>PELI3</i>        | 246330    | 11 | 66241386  | Missense     | G    | A | 0.06  | p.R277Q      |
| 3327 | <i>PHKG2</i>        | 5261      | 16 | 30768183  | Missense     | G    | A | 0.071 | p.R329Q      |
| 3327 | <i>PRKCE</i>        | 5581      | 2  | 46372368  | Missense     | G    | A | 0.2   | p.E577K      |
| 3327 | <i>PTCHD4</i>       | 442213    | 6  | 47846106  | Missense     | C    | T | 0.206 | p.R825Q      |
| 3327 | <i>PTPRQ</i>        | 374462    | 12 | 81064141  | Missense     | G    | C | 0.265 | p.V1986L     |
| 3327 | <i>PVRL2</i>        | 5819      | 19 | 45381597  | In_Frame_Del | TGAG | T | 0.12  | p.387_388del |
| 3327 | <i>QRFPR</i>        | 84109     | 4  | 122301741 | Missense     | G    | A | 0.235 | p.T21M       |
| 3327 | <i>REPS2</i>        | 9185      | X  | 17086525  | Missense     | A    | G | 0.455 | p.K404E      |
| 3327 | <i>RGAG1</i>        | 57529     | X  | 109693960 | Missense     | G    | A | 0.167 | p.V39I       |
| 3327 | <i>RPL11</i>        | 94137     | 8  | 10468858  | Missense     | G    | A | 0.25  | p.A917V      |
| 3327 | <i>SIDT2</i>        | 51092     | 11 | 117062663 | In_Frame_Del | TCAA | T | 0.117 | p.602_603del |
| 3327 | <i>SLC22A23</i>     | 63027     | 6  | 3273371   | Missense     | T    | C | 0.164 | p.D379G      |
| 3327 | <i>SMOC1</i>        | 64093     | 14 | 70480183  | Missense     | T    | G | 0.25  | p.S341A      |
| 3327 | <i>TEX40</i>        | 25858     | 11 | 64070970  | Missense     | G    | C | 0.2   | p.M123I      |
| 3327 | <i>TNFAIP2</i>      | 7127      | 14 | 103593950 | Missense     | C    | G | 0.088 | p.Q282E      |
| 3327 | <i>VCAN</i>         | 1462      | 5  | 82816870  | Missense     | A    | C | 0.113 | p.Q915H      |
| 3327 | <i>WNT8B</i>        | 7479      | 10 | 102240866 | Missense     | G    | T | 0.348 | p.R118L      |
| 3327 | <i>WT1</i>          | 7490      | 11 | 32410647  | Missense     | T    | G | 0.097 | p.N504T      |
| 3327 | <i>ZC3H3</i>        | 23144     | 8  | 144623574 | Missense     | T    | C | 0.07  | p.I6M        |
| 3327 | <i>ZNF101</i>       | 94039     | 19 | 19790159  | Missense     | A    | C | 0.055 | p.M121L      |
| 3327 | <i>ZNF470</i>       | 388566    | 19 | 57089898  | Missense     | G    | A | 0.167 | p.G701R      |
| 3327 | <i>ZNF577</i>       | 84765     | 19 | 52376701  | Missense     | C    | T | 0.182 | p.R181K      |
| 3327 | <i>ZNF646</i>       | 9726      | 16 | 31088022  | Missense     | C    | T | 0.125 | p.S126F      |
| 3327 | <i>ZPI</i>          | 22917     | 11 | 60640911  | Missense     | C    | A | 0.065 | p.P435Q      |
| 3326 | <i>ANKH</i>         | 56172     | 5  | 14749408  | Missense     | G    | T | 0.167 | p.A232E      |
| 3326 | <i>ARFGAP1</i>      | 55738     | 20 | 61919086  | Missense     | C    | T | 0.055 | p.S369L      |
| 3326 | <i>ARHGEF18</i>     | 23370     | 19 | 7529491   | Missense     | G    | A | 0.133 | p.R594Q      |
| 3326 | <i>ARID3A</i>       | 1820      | 19 | 965056    | Missense     | A    | C | 0.467 | p.T392P      |
| 3326 | <i>ARMCX4</i>       | 100131755 | X  | 100745825 | Missense     | T    | C | 0.25  | p.L750P      |

|      |                      |           |    |           |              |      |   |       |              |
|------|----------------------|-----------|----|-----------|--------------|------|---|-------|--------------|
| 3326 | <i>ARMCX4</i>        | 100131755 | X  | 100743826 | Missense     | A    | G | 0.2   | p.R84G       |
| 3326 | <i>ATF7</i>          | 11016     | 12 | 53946348  | Missense     | C    | T | 0.167 | p.R41Q       |
| 3326 | <i>BIRC5</i>         | 332       | 17 | 76212078  | Missense     | A    | C | 0.286 | p.T85P       |
| 3326 | <i>BRINP2</i>        | 57795     | 1  | 177250051 | Missense     | G    | A | 0.24  | p.S580N      |
| 3326 | <i>BSN</i>           | 8927      | 3  | 49688508  | Missense     | C    | A | 0.222 | p.A661E      |
| 3326 | <i>BSPRY</i>         | 54836     | 9  | 116124649 | Missense     | C    | A | 0.167 | p.Q178K      |
| 3326 | <i>C12orf50</i>      | 160419    | 12 | 88374118  | Missense     | C    | G | 0.089 | p.G412A      |
| 3326 | <i>C20orf194</i>     | 25943     | 20 | 3235874   | Missense     | C    | A | 0.125 | p.R1106S     |
| 3326 | <i>C8orf44</i>       | 56260     | 8  | 67590068  | Missense     | T    | C | 0.07  | p.M42T       |
| 3326 | <i>CALHM1</i>        | 255022    | 10 | 105217991 | Missense     | C    | T | 0.222 | p.R173Q      |
| 3326 | <i>DC169-SOHL</i>    | 100526761 | 13 | 36744910  | Missense     | C    | T | 0.105 | p.A416T      |
| 3326 | <i>CD93</i>          | 22918     | 20 | 23065209  | Missense     | G    | A | 0.123 | p.P541S      |
| 3326 | <i>CDH8</i>          | 1006      | 16 | 61689413  | Missense     | C    | T | 0.2   | p.A623T      |
| 3326 | <i>CENPF</i>         | 1063      | 1  | 214815399 | Missense     | A    | C | 0.143 | p.T1240P     |
| 3326 | <i>CEP70</i>         | 80321     | 3  | 138290107 | Splice_Site  | C    | A | 0.182 | c.160+1G>T   |
| 3326 | <i>CFAP45</i>        | 25790     | 1  | 159842768 | Missense     | C    | A | 0.083 | p.D515Y      |
| 3326 | <i>CFHR4</i>         | 10877     | 1  | 196876458 | Missense     | A    | G | 0.12  | p.N209S      |
| 3326 | <i>CLDN17</i>        | 26285     | 21 | 31538656  | Missense     | C    | T | 0.068 | p.A94T       |
| 3326 | <i>CNTN4</i>         | 152330    | 3  | 2928746   | Nonsense     | C    | T | 0.385 | p.R260X      |
| 3326 | <i>COG5</i>          | 10466     | 7  | 107002806 | Missense     | A    | G | 0.125 | p.F330L      |
| 3326 | <i>CRACR2B</i>       | 283229    | 11 | 828916    | Missense     | G    | A | 0.095 | p.R77Q       |
| 3326 | <i>CTSG</i>          | 1511      | 14 | 25043671  | Missense     | T    | C | 0.07  | p.N125S      |
| 3326 | <i>DMKN</i>          | 93099     | 19 | 36004171  | Missense     | C    | A | 0.111 | p.E69D       |
| 3326 | <i>DOCK7</i>         | 85440     | 1  | 63021596  | Missense     | C    | G | 0.176 | p.L832F      |
| 3326 | <i>DSC3</i>          | 1825      | 18 | 28605748  | Missense     | C    | T | 0.118 | p.R203H      |
| 3326 | <i>EPG5</i>          | 57724     | 18 | 43490580  | Missense     | G    | A | 0.154 | p.R1371C     |
| 3326 | <i>FAM135A</i>       | 57579     | 6  | 71187020  | Missense     | A    | C | 0.3   | p.H176P      |
| 3326 | <i>FAM221B</i>       | 392307    | 9  | 35826038  | Missense     | T    | C | 0.08  | p.K41E       |
| 3326 | <i>FAT3</i>          | 120114    | 11 | 92535022  | Missense     | C    | A | 0.083 | p.T2948N     |
| 3326 | <i>FBXW5</i>         | 54461     | 9  | 139836103 | Missense     | G    | A | 0.103 | p.T377M      |
| 3326 | <i>FCRL3</i>         | 115352    | 1  | 157668390 | Missense     | T    | C | 0.097 | p.N28D       |
| 3326 | <i>FOXA2</i>         | 3170      | 20 | 22562697  | Missense     | G    | T | 0.192 | p.H389N      |
| 3326 | <i>FSIP2</i>         | 401024    | 2  | 186654867 | Missense     | G    | C | 0.12  | p.D1091H     |
| 3326 | <i>FSIP2</i>         | 401024    | 2  | 186654592 | Missense     | A    | G | 0.094 | p.N999S      |
| 3326 | <i>FSIP2</i>         | 401024    | 2  | 186664963 | Missense     | C    | A | 0.079 | p.L3733I     |
| 3326 | <i>FSIP2</i>         | 401024    | 2  | 186658438 | Missense     | C    | T | 0.07  | p.T2281M     |
| 3326 | <i>FXR1</i>          | 8087      | 3  | 180669158 | Nonsense     | G    | T | 0.111 | p.G150X      |
| 3326 | <i>GMPPA</i>         | 29926     | 2  | 220366590 | Missense     | C    | T | 0.086 | p.A87V       |
| 3326 | <i>GPR151</i>        | 134391    | 5  | 145895246 | Missense     | G    | A | 0.086 | p.A144V      |
| 3326 | <i>GPRIN3</i>        | 285513    | 4  | 90169925  | Missense     | A    | G | 0.081 | p.V446A      |
| 3326 | <i>HCN1</i>          | 348980    | 5  | 45645378  | Missense     | G    | C | 0.255 | p.A253G      |
| 3326 | <i>HDHD1</i>         | 8226      | X  | 6975782   | Missense     | C    | G | 0.222 | p.C198S      |
| 3326 | <i>HHIPL1</i>        | 84439     | 14 | 100138655 | Missense     | C    | T | 0.267 | p.R578W      |
| 3326 | <i>HLX</i>           | 3142      | 1  | 221053545 | Missense     | T    | C | 0.075 | p.S116P      |
| 3326 | <i>HRNR</i>          | 388697    | 1  | 152192114 | Missense     | C    | T | 0.4   | p.R664Q      |
| 3326 | <i>IGFNI</i>         | 91156     | 1  | 201181217 | Missense     | A    | G | 0.2   | p.D2399G     |
| 3326 | <i>IGFNI</i>         | 91156     | 1  | 201195161 | Missense     | G    | A | 0.167 | p.E3566K     |
| 3326 | <i>JAG2</i>          | 3714      | 14 | 105615534 | Missense     | C    | T | 0.125 | p.E576K      |
| 3326 | <i>KLHL12</i>        | 59349     | 1  | 202887323 | Missense     | C    | A | 0.222 | p.K181N      |
| 3326 | <i>.OCI10192916.</i> | 101929162 | 12 | 108136024 | Missense     | T    | C | 0.406 | p.Y528C      |
| 3326 | <i>LRP1B</i>         | 53353     | 2  | 141625375 | Missense     | C    | T | 0.333 | p.D1455N     |
| 3326 | <i>LRRC17</i>        | 10234     | 7  | 102574999 | In_Frame_Del | TGAA | T | 0.15  | p.214_214del |
| 3326 | <i>MAP6</i>          | 4135      | 11 | 75378924  | Missense     | G    | T | 0.238 | p.P164Q      |
| 3326 | <i>MIR3134</i>       | 100422990 | 9  | 114982463 | Missense     | T    | C | 0.068 | p.T545A      |
| 3326 | <i>MLH3</i>          | 27030     | 14 | 75513828  | Missense     | G    | A | 0.066 | p.P844L      |
| 3326 | <i>MTERF1</i>        | 7978      | 7  | 91503228  | Missense     | C    | T | 0.061 | p.A274T      |
| 3326 | <i>MTHFSD</i>        | 64779     | 16 | 86565826  | Missense     | C    | G | 0.067 | p.G314R      |
| 3326 | <i>MYLK3</i>         | 91807     | 16 | 46746678  | Nonsense     | G    | A | 0.222 | p.R666X      |
| 3326 | <i>NFAM1</i>         | 150372    | 22 | 42807746  | Splice_Site  | G    | T | 0.167 | c.122-4C>A   |
| 3326 | <i>NOL9</i>          | 79707     | 1  | 6593483   | Missense     | A    | G | 0.133 | p.L365P      |
| 3326 | <i>NSFLIC</i>        | 55968     | 20 | 1426393   | Missense     | C    | T | 0.25  | p.D290N      |
| 3326 | <i>OR10T2</i>        | 128360    | 1  | 158368964 | Missense     | C    | T | 0.086 | p.C98Y       |
| 3326 | <i>OR10T2</i>        | 128360    | 1  | 158368974 | Missense     | A    | G | 0.081 | p.F95L       |
| 3326 | <i>OR4L1</i>         | 122742    | 14 | 20528528  | Missense     | G    | A | 0.083 | p.G109S      |
| 3326 | <i>OR4L1</i>         | 122742    | 14 | 20528505  | Missense     | T    | A | 0.068 | p.M101K      |
| 3326 | <i>OR6N1</i>         | 128372    | 1  | 158736445 | Missense     | C    | T | 0.097 | p.A10T       |
| 3326 | <i>OVGP1</i>         | 5016      | 1  | 111957311 | Missense     | G    | C | 0.091 | p.H604Q      |
| 3326 | <i>PARP10</i>        | 84875     | 8  | 145057230 | Missense     | G    | A | 0.111 | p.A809V      |
| 3326 | <i>PCDHA2</i>        | 56146     | 5  | 140183058 | Missense     | G    | A | 0.1   | p.C759Y      |
| 3326 | <i>PCDHB7</i>        | 56129     | 5  | 140553581 | Missense     | G    | C | 0.125 | p.V389L      |
| 3326 | <i>PGBD3</i>         | 267004    | 10 | 50732280  | Missense     | C    | T | 0.075 | p.G399D      |
| 3326 | <i>PILRA</i>         | 29992     | 7  | 99971834  | Missense     | A    | G | 0.067 | p.R78G       |
| 3326 | <i>PLXNB2</i>        | 23654     | 22 | 50717129  | Splice_Site  | T    | G | 0.118 | c.4547-4A>C  |
| 3326 | <i>PLXNB2</i>        | 23654     | 22 | 50728062  | Missense     | T    | C | 0.05  | p.K318E      |
| 3326 | <i>PODXL2</i>        | 50512     | 3  | 127388011 | Missense     | C    | A | 0.125 | p.S464Y      |
| 3326 | <i>POLN</i>          | 353497    | 4  | 2176454   | Missense     | G    | A | 0.25  | p.R425C      |
| 3326 | <i>PPP1R13L</i>      | 10848     | 19 | 45900076  | Missense     | C    | T | 0.167 | p.D147N      |
| 3326 | <i>PRR21</i>         | 643905    | 2  | 240981262 | Missense     | A    | C | 0.2   | p.S380A      |
| 3326 | <i>PRUNE</i>         | 58497     | 1  | 151006537 | Missense     | G    | A | 0.12  | p.G397S      |
| 3326 | <i>PTCHD2</i>        | 57540     | 1  | 11596501  | Missense     | G    | C | 0.143 | p.A1313P     |

|      |                   |           |    |           |             |   |   |       |             |
|------|-------------------|-----------|----|-----------|-------------|---|---|-------|-------------|
| 3326 | <i>PYY</i>        | 5697      | 17 | 42030531  | Missense    | G | C | 0.094 | p.T72R      |
| 3326 | <i>RETSAT</i>     | 54884     | 2  | 85578010  | Nonsense    | G | A | 0.111 | p.R164X     |
| 3326 | <i>RNF43</i>      | 54894     | 17 | 56448297  | Missense    | C | T | 0.107 | p.R117H     |
| 3326 | <i>RNF43</i>      | 54894     | 17 | 56492800  | Missense    | T | C | 0.067 | p.I47V      |
| 3326 | <i>RTKN2</i>      | 219790    | 10 | 63958112  | Missense    | T | C | 0.056 | p.H462R     |
| 3326 | <i>RTN2</i>       | 6253      | 19 | 45998110  | Missense    | C | T | 0.065 | p.R78H      |
| 3326 | <i>SBSPON</i>     | 157869    | 8  | 73982044  | Missense    | C | T | 0.667 | p.D225N     |
| 3326 | <i>SLC43A3</i>    | 29015     | 11 | 57177579  | Missense    | G | A | 0.158 | p.A359V     |
| 3326 | <i>SLC6A5</i>     | 9152      | 11 | 20622975  | Missense    | G | A | 0.06  | p.G102S     |
| 3326 | <i>SMAP1</i>      | 60682     | 6  | 71569090  | Missense    | T | C | 0.079 | p.M416T     |
| 3326 | <i>ST6GAL2</i>    | 84620     | 2  | 107459974 | Missense    | C | T | 0.071 | p.G154R     |
| 3326 | <i>ST6GALNAC5</i> | 81849     | 1  | 77528748  | Missense    | C | T | 0.237 | p.R290C     |
| 3326 | <i>STAB1</i>      | 23166     | 3  | 52556890  | Missense    | A | G | 0.103 | p.I2282V    |
| 3326 | <i>TAF13</i>      | 6884      | 1  | 109608851 | Missense    | C | T | 0.2   | p.R37Q      |
| 3326 | <i>TBC1D26</i>    | 353149    | 17 | 15641610  | Missense    | A | G | 1     | p.Y99C      |
| 3326 | <i>TDFGF1</i>     | 6997      | 3  | 46620614  | Missense    | T | C | 0.081 | p.V22A      |
| 3326 | <i>TFPI1</i>      | 24144     | 22 | 26894831  | Splice_Site | G | A | 0.286 | c.1436+4C>T |
| 3326 | <i>TMEM248</i>    | 55069     | 7  | 66415947  | Missense    | C | T | 0.214 | p.P202L     |
| 3326 | <i>TNFRSF1A</i>   | 7132      | 12 | 6438603   | Missense    | C | T | 0.06  | p.E415K     |
| 3326 | <i>TRAMIL1</i>    | 133022    | 4  | 118005505 | Missense    | C | T | 0.333 | p.G349R     |
| 3326 | <i>UBE2F-SCLY</i> | 100533179 | 2  | 238978059 | Missense    | C | T | 0.07  | p.S150L     |
| 3326 | <i>UBE2Q2</i>     | 92912     | 15 | 76165830  | Missense    | C | T | 0.2   | p.S170L     |
| 3326 | <i>UNC80</i>      | 285175    | 2  | 210685216 | Missense    | C | A | 0.147 | p.A715D     |
| 3326 | <i>VWDE</i>       | 221806    | 7  | 12406989  | Missense    | C | G | 0.064 | p.K964N     |
| 3326 | <i>WDR60</i>      | 55112     | 7  | 158672580 | Missense    | G | A | 0.143 | p.R260Q     |
| 3326 | <i>WNT16</i>      | 51384     | 7  | 120979089 | Missense    | C | T | 0.115 | p.T263I     |
| 3326 | <i>ZBTB11</i>     | 27107     | 3  | 101383562 | Splice_Site | G | A | 0.094 | c.1624-4C>T |
| 3326 | <i>ZC3H12B</i>    | 340554    | X  | 64722934  | Missense    | C | A | 0.105 | p.H786N     |
| 3326 | <i>ZCCHC14</i>    | 23174     | 16 | 87445839  | Missense    | C | T | 0.103 | p.V693M     |
| 3326 | <i>ZNF683</i>     | 257101    | 1  | 26691174  | Missense    | C | A | 0.091 | p.R288L     |
| 3326 | <i>ZSCAN5B</i>    | 342933    | 19 | 56704366  | Missense    | C | T | 0.088 | p.G19E      |
| 3325 | <i>ACVR2A</i>     | 92        | 2  | 148676144 | Missense    | A | C | 0.25  | p.K315N     |
| 3325 | <i>ADAMTS7</i>    | 11173     | 15 | 79092760  | Missense    | T | C | 0.387 | p.D77G      |
| 3325 | <i>AMDHD2</i>     | 51005     | 16 | 2578104   | Missense    | G | T | 0.073 | p.W224C     |
| 3325 | <i>ANKRD22</i>    | 118932    | 10 | 90591731  | Missense    | A | C | 0.36  | p.V25G      |
| 3325 | <i>ANKRD50</i>    | 57182     | 4  | 125591283 | Missense    | C | G | 0.212 | p.C1050S    |
| 3325 | <i>AP5B1</i>      | 91056     | 11 | 65547333  | Missense    | G | A | 0.043 | p.L211F     |
| 3325 | <i>AR</i>         | 367       | X  | 66765161  | Missense    | A | T | 0.062 | p.Q58L      |
| 3325 | <i>ATP6V0A2</i>   | 23545     | 12 | 124203252 | Splice_Site | A | G | 0.297 | c.196+4A>G  |
| 3325 | <i>BDNF-AS</i>    | 497258    | 11 | 27679916  | Missense    | C | T | 0.039 | p.V66M      |
| 3325 | <i>C16orf95</i>   | 100506581 | 16 | 87350773  | Missense    | C | A | 0.083 | p.A26S      |
| 3325 | <i>C17orf112</i>  | 100506650 | 17 | 51063874  | Missense    | G | C | 0.174 | p.G40R      |
| 3325 | <i>C2orf54</i>    | 79919     | 2  | 241831296 | Missense    | C | G | 0.091 | p.A21P      |
| 3325 | <i>CACHD1</i>     | 57685     | 1  | 65145363  | Missense    | G | C | 0.231 | p.L1059F    |
| 3325 | <i>CCER1</i>      | 196477    | 12 | 91348075  | Missense    | C | T | 0.194 | p.G149S     |
| 3325 | <i>CDC42EP3</i>   | 10602     | 2  | 37873636  | Missense    | C | T | 0.235 | p.S32N      |
| 3325 | <i>CEP55</i>      | 55165     | 10 | 95279506  | Missense    | A | T | 0.093 | p.H378L     |
| 3325 | <i>CETN1</i>      | 1068      | 18 | 580623    | Missense    | T | C | 0.066 | p.M72T      |
| 3325 | <i>CGNL1</i>      | 84952     | 15 | 57730888  | Missense    | A | G | 0.261 | p.T231A     |
| 3325 | <i>COL6A5</i>     | 256076    | 3  | 130188092 | Missense    | C | T | 0.259 | p.A2415V    |
| 3325 | <i>CRB2</i>       | 286204    | 9  | 126133684 | Missense    | G | A | 0.062 | p.D755N     |
| 3325 | <i>CYP4A11</i>    | 1579      | 1  | 47395874  | Missense    | A | C | 0.154 | p.I491M     |
| 3325 | <i>DACT2</i>      | 168002    | 6  | 168708816 | Missense    | T | G | 0.125 | p.T541P     |
| 3325 | <i>DAPK1</i>      | 1612      | 9  | 90258316  | Missense    | G | A | 0.241 | p.C315Y     |
| 3325 | <i>DDX26B</i>     | 203522    | X  | 134713724 | Missense    | A | G | 0.207 | p.I674V     |
| 3325 | <i>DDX60L</i>     | 91351     | 4  | 169362557 | Missense    | C | G | 0.07  | p.V409L     |
| 3325 | <i>DHRS4L1</i>    | 728635    | 14 | 24520160  | Missense    | A | C | 0.875 | p.T146P     |
| 3325 | <i>EPHB4</i>      | 2050      | 7  | 100417778 | Missense    | C | T | 0.192 | p.G317S     |
| 3325 | <i>FAM135A</i>    | 57579     | 6  | 71187020  | Missense    | A | C | 0.264 | p.H176P     |
| 3325 | <i>FAM83A</i>     | 84985     | 8  | 124206324 | Missense    | G | A | 0.122 | p.A237T     |
| 3325 | <i>FAT1</i>       | 2195      | 4  | 187629624 | Missense    | A | G | 0.184 | p.V453A     |
| 3325 | <i>FGFR4</i>      | 2264      | 5  | 176522367 | Missense    | C | T | 0.229 | p.S519L     |
| 3325 | <i>FGG</i>        | 2266      | 4  | 155533013 | Missense    | C | A | 0.255 | p.M115I     |
| 3325 | <i>FRMPD1</i>     | 22844     | 9  | 37745747  | Missense    | G | T | 0.309 | p.A1240S    |
| 3325 | <i>FRY</i>        | 10129     | 13 | 32808741  | Missense    | T | A | 0.185 | p.V1853D    |
| 3325 | <i>GFRAL</i>      | 389400    | 6  | 55266625  | Missense    | T | C | 0.071 | p.S387P     |
| 3325 | <i>GPATCH2</i>    | 55105     | 1  | 217804268 | Missense    | C | T | 0.333 | p.G16R      |
| 3325 | <i>GRIN2D</i>     | 2906      | 19 | 48923009  | Missense    | C | A | 0.475 | p.L677M     |
| 3325 | <i>GUCY1A2</i>    | 2977      | 11 | 106810251 | Nonsense    | G | A | 0.278 | p.R381X     |
| 3325 | <i>HCAR3</i>      | 8843      | 12 | 123200527 | Missense    | T | C | 0.625 | p.H253R     |
| 3325 | <i>HIST1H4D</i>   | 8360      | 6  | 26189076  | Missense    | C | T | 0.042 | p.A77T      |
| 3325 | <i>HLA-B</i>      | 3106      | 6  | 31323309  | Missense    | C | A | 0.278 | p.C227F     |
| 3325 | <i>HOXB7</i>      | 3217      | 17 | 46688256  | Missense    | T | C | 0.049 | p.T9A       |
| 3325 | <i>HS6ST2</i>     | 90161     | X  | 132092324 | Nonsense    | G | A | 0.333 | p.R103X     |
| 3325 | <i>ITGA1</i>      | 3672      | 5  | 52145300  | Nonsense    | G | T | 0.297 | p.E55X      |
| 3325 | <i>KALRN</i>      | 8997      | 3  | 123987830 | Missense    | A | C | 0.155 | p.T231P     |
| 3325 | <i>KIAA1683</i>   | 80726     | 19 | 18377496  | Missense    | C | G | 0.051 | p.S285T     |
| 3325 | <i>LRP3</i>       | 4037      | 19 | 33696931  | Missense    | G | A | 0.506 | p.D419N     |
| 3325 | <i>MACF1</i>      | 23499     | 1  | 39844955  | Missense    | G | A | 0.333 | p.E2391K    |
| 3325 | <i>MAP2</i>       | 4133      | 2  | 210560393 | Missense    | G | A | 0.303 | p.V1167I    |



|      |                   |           |    |           |                 |    |    |       |             |
|------|-------------------|-----------|----|-----------|-----------------|----|----|-------|-------------|
| 3325 | <i>MINK1</i>      | 50488     | 17 | 4788294   | Missense        | C  | A  | 0.24  | p.L169I     |
| 3325 | <i>MMEL1</i>      | 79258     | 1  | 2526746   | Missense        | A  | G  | 0.081 | p.M518T     |
| 3325 | <i>MOB2</i>       | 81532     | 11 | 1492591   | Missense        | C  | T  | 0.304 | p.V142I     |
| 3325 | <i>MROH2B</i>     | 133558    | 5  | 41047824  | Missense        | T  | C  | 0.167 | p.Q576R     |
| 3325 | <i>MSH6</i>       | 2956      | 2  | 48030639  | Frame_Shift_Ins | A  | AC | 0.213 | p.T783fs    |
| 3325 | <i>MUC6</i>       | 4588      | 11 | 1017325   | Missense        | A  | C  | 0.162 | p.Y1826D    |
| 3325 | <i>MUC7</i>       | 4589      | 4  | 71347171  | Missense        | C  | T  | 0.16  | p.A237V     |
| 3325 | <i>MUC7</i>       | 4589      | 4  | 71347077  | Missense        | T  | C  | 0.092 | p.S206P     |
| 3325 | <i>NFIB</i>       | 4781      | 9  | 14398569  | Missense        | T  | C  | 0.32  | p.N21S      |
| 3325 | <i>NFIB</i>       | 4781      | 9  | 14113074  | Missense        | G  | A  | 0.229 | p.T464I     |
| 3325 | <i>NRAP</i>       | 4892      | 10 | 115377290 | Missense        | T  | C  | 0.125 | p.D966G     |
| 3325 | <i>NUGGC</i>      | 389643    | 8  | 27925204  | Missense        | T  | C  | 0.044 | p.S180G     |
| 3325 | <i>OR51T1</i>     | 401665    | 11 | 4903802   | Missense        | C  | T  | 0.265 | p.R252C     |
| 3325 | <i>OR56A3</i>     | 390083    | 11 | 5968900   | Missense        | G  | A  | 0.309 | p.M108I     |
| 3325 | <i>OR56A3</i>     | 390083    | 11 | 5969451   | Missense        | A  | G  | 0.229 | p.N292S     |
| 3325 | <i>OXTR</i>       | 5021      | 3  | 8809222   | Missense        | C  | T  | 0.073 | p.A218T     |
| 3325 | <i>PGM1</i>       | 5236      | 1  | 64117428  | Missense        | A  | G  | 0.308 | p.K457E     |
| 3325 | <i>PLSCR2</i>     | 57047     | 3  | 146179647 | Missense        | T  | A  | 0.229 | p.N5I       |
| 3325 | <i>PRSS27</i>     | 83886     | 16 | 2762757   | Missense        | A  | C  | 0.526 | p.V246G     |
| 3325 | <i>RBMS3</i>      | 27303     | 3  | 29628700  | Splice_Site     | A  | C  | 0.306 | c.399+4A>C  |
| 3325 | <i>RNF43</i>      | 54894     | 17 | 56435885  | Missense        | G  | T  | 0.091 | p.L418M     |
| 3325 | <i>RTFDC1</i>     | 51507     | 20 | 55093224  | Nonsense        | C  | A  | 0.07  | p.S305X     |
| 3325 | <i>RTP5</i>       | 285093    | 2  | 242815059 | Missense        | C  | T  | 0.071 | p.A451V     |
| 3325 | <i>RUNX1T1</i>    | 862       | 8  | 93004077  | Nonsense        | C  | A  | 0.215 | p.E234X     |
| 3325 | <i>SGTA</i>       | 6449      | 19 | 2757459   | Splice_Site     | C  | A  | 0.263 | c.828-4G>T  |
| 3325 | <i>SLC16A8</i>    | 23539     | 22 | 38477342  | Missense        | T  | A  | 0.167 | p.R235W     |
| 3325 | <i>SLC22A13</i>   | 9390      | 3  | 38307697  | Missense        | C  | A  | 0.167 | p.P116T     |
| 3325 | <i>SLC25A5</i>    | 292       | X  | 118603925 | Missense        | G  | A  | 0.165 | p.R138H     |
| 3325 | <i>SLC43A3</i>    | 29015     | 11 | 57185305  | Missense        | C  | T  | 0.279 | p.C196Y     |
| 3325 | <i>SLITRK2</i>    | 84631     | X  | 144905880 | Missense        | G  | A  | 0.17  | p.R646H     |
| 3325 | <i>SMTN</i>       | 6525      | 22 | 31489858  | Missense        | G  | T  | 0.111 | p.S628I     |
| 3325 | <i>SPTB</i>       | 6710      | 14 | 65241965  | Missense        | C  | A  | 0.077 | p.A1574S    |
| 3325 | <i>SSPO</i>       | 23145     | 7  | 149486405 | Missense        | G  | A  | 0.179 | p.D1461N    |
| 3325 | <i>THEG</i>       | 51298     | 19 | 362268    | Missense        | C  | A  | 0.188 | p.A358S     |
| 3325 | <i>TIFAB</i>      | 497189    | 5  | 134785467 | Missense        | G  | A  | 0.303 | p.R55C      |
| 3325 | <i>TKTL1</i>      | 8277      | X  | 153553724 | Missense        | G  | C  | 0.163 | p.V453L     |
| 3325 | <i>TLR4</i>       | 7099      | 9  | 120475863 | Missense        | A  | T  | 0.275 | p.N446I     |
| 3325 | <i>TUBGCP3</i>    | 10426     | 13 | 113212589 | Missense        | C  | T  | 0.167 | p.V157M     |
| 3325 | <i>WDR90</i>      | 197335    | 16 | 716273    | Missense        | T  | C  | 0.041 | p.C1555R    |
| 3325 | <i>ZNF236</i>     | 7776      | 18 | 74637216  | Missense        | C  | T  | 0.064 | p.R1243C    |
| 3325 | <i>ZNF441</i>     | 126068    | 19 | 11888453  | Missense        | A  | G  | 0.25  | p.I11V      |
| 3325 | <i>ZNF831</i>     | 128611    | 20 | 57768743  | Missense        | C  | T  | 0.068 | p.A890V     |
| 3324 | <i>ABCA8</i>      | 10351     | 17 | 66903989  | Missense        | T  | G  | 0.3   | p.N724H     |
| 3324 | <i>ACSM6</i>      | 142827    | 10 | 96985105  | Missense        | G  | A  | 0.278 | p.R420H     |
| 3324 | <i>ADAMTS16</i>   | 170690    | 5  | 5237162   | Missense        | A  | G  | 0.344 | p.T702A     |
| 3324 | <i>ANK3</i>       | 288       | 10 | 61846611  | Missense        | T  | G  | 0.456 | p.K1192T    |
| 3324 | <i>ANKRD24</i>    | 170961    | 19 | 4219622   | Missense        | G  | A  | 0.071 | p.R1013Q    |
| 3324 | <i>ANKRD31</i>    | 256006    | 5  | 74400816  | Missense        | T  | G  | 0.306 | p.N1466T    |
| 3324 | <i>APOA4</i>      | 337       | 11 | 116692334 | Missense        | C  | T  | 0.07  | p.S147N     |
| 3324 | <i>ARHGAP28</i>   | 79822     | 18 | 6851058   | Missense        | C  | G  | 0.079 | p.T31S      |
| 3324 | <i>ARHGAP29</i>   | 9411      | 1  | 94652126  | Missense        | G  | A  | 0.51  | p.T570I     |
| 3324 | <i>ASCL4</i>      | 121549    | 12 | 108169146 | Missense        | C  | T  | 0.387 | p.R52C      |
| 3324 | <i>BANK1</i>      | 55024     | 4  | 102984282 | Missense        | A  | C  | 0.303 | p.E733D     |
| 3324 | <i>BTBD11</i>     | 121551    | 12 | 108045467 | Missense        | A  | C  | 0.314 | p.K1003T    |
| 3324 | <i>C19orf73</i>   | 55150     | 19 | 49621964  | Missense        | T  | C  | 0.077 | p.S106G     |
| 3324 | <i>C6orf38</i>    | 352999    | 6  | 127911369 | Missense        | T  | G  | 0.295 | p.L271R     |
| 3324 | <i>CCNB2</i>      | 9133      | 15 | 59406996  | Missense        | T  | C  | 0.1   | p.L173P     |
| 3324 | <i>CD109</i>      | 135228    | 6  | 74530219  | Missense        | C  | G  | 0.364 | p.A1365G    |
| 3324 | <i>CELA3B</i>     | 23436     | 1  | 22307538  | Missense        | C  | T  | 0.06  | p.R79W      |
| 3324 | <i>CLUH</i>       | 23277     | 17 | 2600186   | Missense        | G  | A  | 0.128 | p.A633V     |
| 3324 | <i>CNTN1</i>      | 1272      | 12 | 41327330  | Missense        | A  | C  | 0.288 | p.Q257H     |
| 3324 | <i>COBLL1</i>     | 22837     | 2  | 165548727 | Splice_Site     | T  | G  | 0.222 | c.3414+4A>C |
| 3324 | <i>COL22A1</i>    | 169044    | 8  | 139728466 | Splice_Site     | T  | G  | 0.32  | c.2463+4A>C |
| 3324 | <i>CPED1</i>      | 79974     | 7  | 120686989 | Missense        | C  | T  | 0.38  | p.A161V     |
| 3324 | <i>CPNE8</i>      | 144402    | 12 | 39047772  | Missense        | A  | G  | 0.409 | p.L536P     |
| 3324 | <i>CYP4F22</i>    | 126410    | 19 | 15636235  | Missense        | T  | G  | 0.292 | p.F30V      |
| 3324 | <i>DDX3X</i>      | 1654      | X  | 41204711  | Missense        | G  | A  | 0.74  | p.G409S     |
| 3324 | <i>DGAT2L6</i>    | 347516    | X  | 69419150  | Missense        | T  | G  | 0.556 | p.F39V      |
| 3324 | <i>DHX37</i>      | 57647     | 12 | 125455946 | Missense        | G  | A  | 0.06  | p.R365W     |
| 3324 | <i>DISC1</i>      | 27185     | 1  | 231902929 | Frame_Shift_Del | AG | A  | 0.353 | p.R470fs    |
| 3324 | <i>DNAH11</i>     | 8701      | 7  | 21641193  | Missense        | G  | T  | 0.279 | p.S1202I    |
| 3324 | <i>DNAJC27</i>    | 51277     | 2  | 25194748  | Missense        | T  | C  | 0.183 | p.K9R       |
| 3324 | <i>DST</i>        | 667       | 6  | 56324965  | Missense        | T  | G  | 0.317 | p.T5577P    |
| 3324 | <i>DVL2</i>       | 1856      | 17 | 7129551   | Missense        | T  | C  | 0.053 | p.K615R     |
| 3324 | <i>DZANK1</i>     | 55184     | 20 | 18446022  | Splice_Site     | C  | A  | 0.214 | .           |
| 3324 | <i>EBF2</i>       | 64641     | 8  | 25718821  | Splice_Site     | T  | A  | 0.286 | c.1164+4A>T |
| 3324 | <i>EGLN3</i>      | 112399    | 14 | 34419859  | Missense        | A  | C  | 0.074 | p.F34V      |
| 3324 | <i>AM47E-STBD</i> | 100631383 | 4  | 77192868  | Missense        | G  | A  | 0.148 | p.E273K     |
| 3324 | <i>FAM65C</i>     | 140876    | 20 | 49218991  | Missense        | G  | A  | 0.319 | p.T422I     |
| 3324 | <i>FAM69C</i>     | 125704    | 18 | 72114011  | Missense        | A  | C  | 0.2   | p.F236V     |

|      |                  |        |    |           |                 |    |   |       |             |
|------|------------------|--------|----|-----------|-----------------|----|---|-------|-------------|
| 3324 | <i>FAM83B</i>    | 222584 | 6  | 54806031  | Missense        | A  | C | 0.4   | p.E754D     |
| 3324 | <i>FAT1</i>      | 2195   | 4  | 187538942 | Missense        | T  | G | 0.061 | p.Q2933P    |
| 3324 | <i>FBXO15</i>    | 201456 | 18 | 71797887  | Missense        | A  | C | 0.25  | p.L37M      |
| 3324 | <i>FLT4</i>      | 2324   | 5  | 180048811 | Missense        | T  | A | 0.268 | p.K584M     |
| 3324 | <i>FRMPD2</i>    | 143162 | 10 | 49482597  | Missense        | G  | A | 0.328 | p.T5M       |
| 3324 | <i>FZD1</i>      | 8321   | 7  | 90895013  | Missense        | A  | C | 0.204 | p.K273T     |
| 3324 | <i>GARI</i>      | 54433  | 4  | 110739148 | Missense        | G  | C | 0.306 | p.D91H      |
| 3324 | <i>GAREM</i>     | 64762  | 18 | 29867745  | Missense        | T  | C | 0.038 | p.K272R     |
| 3324 | <i>GDF3</i>      | 9573   | 12 | 7842851   | Missense        | G  | A | 0.329 | p.P240S     |
| 3324 | <i>GIPC3</i>     | 126326 | 19 | 3586562   | Missense        | G  | A | 0.306 | p.E99K      |
| 3324 | <i>GPR125</i>    | 166647 | 4  | 22475411  | Missense        | T  | C | 0.474 | p.S105G     |
| 3324 | <i>GPR157</i>    | 80045  | 1  | 9165685   | Missense        | G  | A | 0.071 | p.R218C     |
| 3324 | <i>GRIA4</i>     | 2893   | 11 | 105781225 | Missense        | A  | G | 0.3   | p.D408G     |
| 3324 | <i>HCRT2</i>     | 3062   | 6  | 55113563  | Missense        | C  | G | 0.397 | p.T117S     |
| 3324 | <i>HKR1</i>      | 284459 | 19 | 37853253  | Missense        | A  | G | 0.25  | p.R186G     |
| 3324 | <i>HSD3B1</i>    | 3283   | 1  | 120056673 | Missense        | A  | C | 0.442 | p.N176T     |
| 3324 | <i>HUWE1</i>     | 10075  | X  | 53610641  | Missense        | C  | A | 0.064 | p.K1799N    |
| 3324 | <i>IAPP</i>      | 3375   | 12 | 21531254  | Missense        | A  | C | 0.327 | p.N55T      |
| 3324 | <i>IBSP</i>      | 3381   | 4  | 88731906  | Missense        | T  | C | 0.407 | p.L132P     |
| 3324 | <i>IBSP</i>      | 3381   | 4  | 88731881  | Missense        | T  | C | 0.321 | p.Y124H     |
| 3324 | <i>IGSF3</i>     | 3321   | 1  | 117146423 | Missense        | C  | T | 0.444 | p.G503S     |
| 3324 | <i>IL17REL</i>   | 400935 | 22 | 50439514  | Missense        | G  | T | 0.55  | p.H36N      |
| 3324 | <i>IQCA1</i>     | 79781  | 2  | 237272565 | Missense        | G  | A | 0.279 | p.P576L     |
| 3324 | <i>IQGAP3</i>    | 128239 | 1  | 156531643 | Missense        | T  | C | 0.133 | p.E343G     |
| 3324 | <i>ISYN1</i>     | 51477  | 19 | 18546734  | Splice_Site     | G  | A | 0.367 | c.976-3C>T  |
| 3324 | <i>KBTD12</i>    | 166348 | 3  | 127641968 | Missense        | C  | A | 0.048 | p.Q22K      |
| 3324 | <i>KCNK2</i>     | 3776   | 1  | 215259839 | Missense        | T  | A | 0.333 | p.W44R      |
| 3324 | <i>KIAA0100</i>  | 9703   | 17 | 26961940  | Missense        | T  | C | 0.386 | p.K889E     |
| 3324 | <i>KIF6</i>      | 221458 | 6  | 39507787  | Missense        | T  | C | 0.367 | p.K546R     |
| 3324 | <i>KRT27</i>     | 342574 | 17 | 38933970  | Missense        | C  | A | 0.25  | p.E329D     |
| 3324 | <i>KRTAP11-1</i> | 337880 | 21 | 32253513  | Missense        | A  | T | 0.065 | p.C111S     |
| 3324 | <i>LCA5</i>      | 167691 | 6  | 80197570  | Missense        | T  | G | 0.375 | p.E415D     |
| 3324 | <i>LILRA4</i>    | 23547  | 19 | 54848157  | Missense        | A  | G | 0.111 | p.Y404H     |
| 3324 | <i>LRP1B</i>     | 53353  | 2  | 141771191 | Missense        | T  | C | 0.259 | p.T772A     |
| 3324 | <i>MAGED1</i>    | 9500   | X  | 51644764  | Missense        | C  | A | 0.081 | p.T748N     |
| 3324 | <i>MARVELD2</i>  | 153562 | 5  | 68716362  | Splice_Site     | A  | C | 0.375 | c.1146+4A>C |
| 3324 | <i>MED12L</i>    | 116931 | 3  | 150840650 | Missense        | A  | C | 0.382 | p.Q95H      |
| 3324 | <i>MFAP1</i>     | 4236   | 15 | 44097413  | Missense        | G  | T | 0.413 | p.T400N     |
| 3324 | <i>MTF2</i>      | 22823  | 1  | 93592788  | Splice_Site     | G  | A | 0.319 | c.922-1G>A  |
| 3324 | <i>MUC16</i>     | 94025  | 19 | 9065656   | Missense        | T  | C | 0.276 | p.S7264G    |
| 3324 | <i>MUC16</i>     | 94025  | 19 | 9062182   | Frame_Shift_Del | TG | T | 0.213 | p.T8421fs   |
| 3324 | <i>MYH13</i>     | 8735   | 17 | 10243710  | Missense        | C  | T | 0.188 | p.G635R     |
| 3324 | <i>MYO18B</i>    | 84700  | 22 | 26422950  | Frame_Shift_Del | CA | C | 0.333 | p.T2337fs   |
| 3324 | <i>NAT2</i>      | 10     | 8  | 18258105  | Missense        | A  | C | 0.378 | p.T198P     |
| 3324 | <i>NCAPG2</i>    | 54892  | 7  | 158447333 | Missense        | C  | A | 0.133 | p.Q900H     |
| 3324 | <i>NHS</i>       | 4810   | X  | 17744510  | Missense        | T  | G | 0.609 | p.F762V     |
| 3324 | <i>NKX2-1</i>    | 7080   | 14 | 36987192  | Missense        | T  | G | 0.14  | p.N166T     |
| 3324 | <i>NRG3</i>      | 10718  | 10 | 84711262  | Missense        | T  | G | 0.258 | p.I143M     |
| 3324 | <i>NRIP1</i>     | 8204   | 21 | 16338248  | Missense        | T  | G | 0.323 | p.K756Q     |
| 3324 | <i>OR11G2</i>    | 390439 | 14 | 20665706  | Missense        | T  | G | 0.347 | p.V71G      |
| 3324 | <i>OR2F1</i>     | 26211  | 7  | 143657892 | Missense        | T  | A | 0.036 | p.F277I     |
| 3324 | <i>OR2L13</i>    | 284521 | 1  | 248112794 | Missense        | G  | C | 0.667 | p.G212A     |
| 3324 | <i>OR9Q1</i>     | 219956 | 11 | 57886024  | Missense        | T  | G | 0.307 | p.K298T     |
| 3324 | <i>PCDHA8</i>    | 56140  | 5  | 140228918 | Missense        | T  | A | 0.667 | p.S280T     |
| 3324 | <i>PDPR</i>      | 55066  | 16 | 70176575  | Missense        | A  | G | 0.118 | p.K531E     |
| 3324 | <i>PGLYRP2</i>   | 114770 | 19 | 15582863  | Missense        | C  | T | 0.107 | p.R394Q     |
| 3324 | <i>PIH1D1</i>    | 55011  | 19 | 49950298  | Missense        | C  | T | 0.095 | p.V224I     |
| 3324 | <i>PIK3C2G</i>   | 5288   | 12 | 18716387  | Missense        | T  | G | 0.28  | p.L1064R    |
| 3324 | <i>PLA2G4E</i>   | 123745 | 15 | 42292348  | Missense        | T  | A | 0.333 | p.Q269L     |
| 3324 | <i>PTPN14</i>    | 5784   | 1  | 214558072 | Missense        | A  | C | 0.25  | p.L376V     |
| 3324 | <i>PYGL</i>      | 5836   | 14 | 51379778  | Missense        | A  | C | 0.343 | p.V530G     |
| 3324 | <i>RIMS2</i>     | 9699   | 8  | 105264025 | Missense        | G  | A | 0.074 | p.G1343R    |
| 3324 | <i>RUNX1T1</i>   | 862    | 8  | 92972522  | Missense        | G  | A | 0.413 | p.P561L     |
| 3324 | <i>RYR3</i>      | 6263   | 15 | 33855189  | Missense        | G  | A | 0.371 | p.R375H     |
| 3324 | <i>SAG</i>       | 6295   | 2  | 234237198 | Missense        | C  | T | 0.19  | p.A196V     |
| 3324 | <i>SLC1T1</i>    | 132320 | 4  | 129857846 | Missense        | A  | C | 0.305 | p.L598R     |
| 3324 | <i>SHISA7</i>    | 729956 | 19 | 55944629  | Missense        | C  | A | 0.167 | p.R504M     |
| 3324 | <i>SLC5A7</i>    | 60482  | 2  | 108608661 | Missense        | T  | G | 0.412 | p.L93R      |
| 3324 | <i>SLC05A1</i>   | 81796  | 8  | 70744812  | Missense        | G  | A | 0.067 | p.L33F      |
| 3324 | <i>SNCB</i>      | 6620   | 5  | 176048214 | Splice_Site     | C  | A | 0.182 | c.372+1G>T  |
| 3324 | <i>SOGA3</i>     | 387104 | 6  | 127836023 | Missense        | G  | A | 0.37  | p.A424V     |
| 3324 | <i>SPECC1</i>    | 92521  | 17 | 20109196  | Missense        | A  | T | 0.158 | p.I612F     |
| 3324 | <i>SPIB</i>      | 6689   | 19 | 50926264  | Missense        | T  | C | 0.07  | p.L84P      |
| 3324 | <i>SSPO</i>      | 23145  | 7  | 149509419 | Missense        | C  | T | 0.067 | p.R3273W    |
| 3324 | <i>TACC3</i>     | 10460  | 4  | 1729953   | Missense        | G  | A | 0.075 | p.C275Y     |
| 3324 | <i>TACC3</i>     | 10460  | 4  | 1729988   | Missense        | G  | A | 0.067 | p.G287S     |
| 3324 | <i>TCF7L2</i>    | 6934   | 10 | 114901072 | Missense        | A  | C | 0.082 | p.T228P     |
| 3324 | <i>TET2</i>      | 54790  | 4  | 106157290 | Nonsense        | C  | T | 0.6   | p.Q731X     |
| 3324 | <i>TMEM117</i>   | 84216  | 12 | 44782218  | Missense        | A  | C | 0.323 | p.R436S     |
| 3324 | <i>TMPRSS15</i>  | 5651   | 21 | 19642349  | Missense        | A  | C | 0.342 | p.N999K     |

|      |                     |           |    |           |             |   |   |       |             |
|------|---------------------|-----------|----|-----------|-------------|---|---|-------|-------------|
| 3324 | <i>TOR1A</i>        | 1861      | 9  | 132584959 | Missense    | G | C | 0.395 | p.I115M     |
| 3324 | <i>TRAM1L1</i>      | 133022    | 4  | 118005907 | Missense    | A | C | 0.267 | p.L215V     |
| 3324 | <i>UNC13A</i>       | 23025     | 19 | 17729726  | Missense    | A | G | 0.41  | p.S1440P    |
| 3324 | <i>UNC5D</i>        | 137970    | 8  | 35606112  | Missense    | G | A | 0.246 | p.V612I     |
| 3324 | <i>XIRP2-AS1</i>    | 100874011 | 2  | 167992437 | Missense    | A | C | 0.353 | p.S143R     |
| 3324 | <i>ZBBX</i>         | 79740     | 3  | 167023579 | Missense    | A | C | 0.467 | p.L526R     |
| 3324 | <i>ZNF205</i>       | 7755      | 16 | 3169442   | Missense    | C | T | 0.263 | p.P261S     |
| 3324 | <i>ZNF281</i>       | 23528     | 1  | 200378064 | Missense    | C | A | 0.33  | p.S221I     |
| 151  | <i>ABCA1</i>        | 19        | 9  | 107591295 | Missense    | T | C | 0.258 | p.L673V     |
| 151  | <i>ABCA9-AS1</i>    | 104355297 | 17 | 67003947  | Missense    | G | A | 0.129 | p.R1130C    |
| 151  | <i>ACOX1</i>        | 51        | 17 | 73949540  | Missense    | G | C | 0.2   | p.I312M     |
| 151  | <i>ADRA1D</i>       | 146       | 20 | 4228640   | Missense    | C | T | 0.143 | p.R322H     |
| 151  | <i>AGL</i>          | 178       | 1  | 100316589 | Splice_Site | A | G | 0.063 | .           |
| 151  | <i>AKAP13</i>       | 11214     | 15 | 86124483  | Missense    | C | G | 0.043 | p.P1062A    |
| 151  | <i>ANKRD26</i>      | 22852     | 10 | 27317840  | Missense    | C | T | 0.06  | p.V1305I    |
| 151  | <i>ANKRD52</i>      | 283373    | 12 | 56639301  | Missense    | C | G | 0.286 | p.R755P     |
| 151  | <i>ARFGEF1</i>      | 10565     | 8  | 68200276  | Missense    | T | C | 0.061 | p.Y314C     |
| 151  | <i>ARPC1A</i>       | 10552     | 7  | 98963542  | Missense    | G | T | 0.13  | p.R368L     |
| 151  | <i>ATXN7L1</i>      | 222255    | 7  | 105254506 | Missense    | G | T | 0.061 | p.L759M     |
| 151  | <i>CI2orf50</i>     | 160419    | 12 | 88391873  | Missense    | G | C | 0.139 | p.L76M      |
| 151  | <i>CACNA1B</i>      | 774       | 9  | 141016207 | Missense    | A | T | 0.179 | p.T2197S    |
| 151  | <i>CBR4</i>         | 84869     | 4  | 169931175 | Missense    | C | T | 0.167 | p.M22I      |
| 151  | <i>CCKAR</i>        | 886       | 4  | 26491040  | Missense    | G | A | 0.102 | p.T60M      |
| 151  | <i>CD200R1</i>      | 131450    | 3  | 112642568 | Missense    | C | G | 0.092 | p.E335Q     |
| 151  | <i>CDH20</i>        | 28316     | 18 | 59167652  | Missense    | A | G | 0.212 | p.D193G     |
| 151  | <i>CHD5</i>         | 26038     | 1  | 6169924   | Missense    | C | T | 0.06  | p.E1837K    |
| 151  | <i>CHPT1</i>        | 56994     | 12 | 102108345 | Missense    | T | C | 0.054 | p.F162S     |
| 151  | <i>CLCN6</i>        | 1185      | 1  | 11896069  | Nonsense    | C | A | 0.115 | p.Y613X     |
| 151  | <i>COL6A3</i>       | 1293      | 2  | 238303686 | Missense    | C | T | 0.157 | p.G85R      |
| 151  | <i>COL6A5</i>       | 256076    | 3  | 130103709 | Missense    | G | A | 0.06  | p.E455K     |
| 151  | <i>CSMD3</i>        | 114788    | 8  | 113933907 | Missense    | G | A | 0.159 | p.R488W     |
| 151  | <i>CTAGE1</i>       | 64693     | 18 | 19996606  | Missense    | A | G | 0.15  | p.M390T     |
| 151  | <i>CYB5RL</i>       | 606495    | 1  | 54661150  | Missense    | C | T | 0.12  | p.R47K      |
| 151  | <i>DCHS2</i>        | 54798     | 4  | 155241572 | Missense    | G | A | 0.047 | p.S1205L    |
| 151  | <i>DENND4A</i>      | 10260     | 15 | 65983315  | Missense    | T | G | 0.261 | p.D1205A    |
| 151  | <i>DHX57</i>        | 90957     | 2  | 39053704  | Missense    | C | T | 0.069 | p.D923N     |
| 151  | <i>DLK1</i>         | 8788      | 14 | 101200896 | Missense    | T | G | 0.149 | p.V272G     |
| 151  | <i>DMD</i>          | 1756      | X  | 32503194  | Missense    | T | C | 0.214 | p.D759G     |
| 151  | <i>DMD</i>          | 1756      | X  | 32380996  | Missense    | C | T | 0.103 | p.R1622H    |
| 151  | <i>DMXL1</i>        | 1657      | 5  | 118510977 | Missense    | G | A | 0.146 | p.A2235T    |
| 151  | <i>DRD3</i>         | 1814      | 3  | 113890815 | Missense    | C | T | 0.078 | p.G9S       |
| 151  | <i>DSCAML1</i>      | 57453     | 11 | 117403235 | Missense    | G | T | 0.06  | p.H232N     |
| 151  | <i>DSCAS</i>        | 101927698 | 18 | 28714604  | Missense    | T | A | 0.103 | p.N603Y     |
| 151  | <i>EGFLAM</i>       | 133584    | 5  | 38412674  | Missense    | C | T | 0.094 | p.T473M     |
| 151  | <i>EIF3A</i>        | 8661      | 10 | 120797796 | Missense    | C | G | 0.136 | p.D1228H    |
| 151  | <i>EP300</i>        | 2033      | 22 | 41546084  | Nonsense    | C | G | 0.108 | p.S900X     |
| 151  | <i>FAM186A</i>      | 121006    | 12 | 50727706  | Missense    | G | C | 0.086 | p.H2228Q    |
| 151  | <i>FAM214A</i>      | 56204     | 15 | 52901283  | Missense    | T | C | 0.048 | p.T610A     |
| 151  | <i>FAM217A</i>      | 222826    | 6  | 4069166   | Missense    | C | T | 0.045 | p.V431I     |
| 151  | <i>FAM221B</i>      | 392307    | 9  | 35826038  | Missense    | T | C | 0.06  | p.K41E      |
| 151  | <i>FAM221B</i>      | 392307    | 9  | 35826058  | Missense    | T | C | 0.06  | p.H34R      |
| 151  | <i>FAT1</i>         | 2195      | 4  | 187542633 | Missense    | C | G | 0.168 | p.D1703H    |
| 151  | <i>FBN2</i>         | 2201      | 5  | 127728992 | Missense    | G | T | 0.161 | p.P434H     |
| 151  | <i>FSCB</i>         | 84075     | 14 | 44974966  | Missense    | G | A | 0.133 | p.P409S     |
| 151  | <i>FSCB</i>         | 84075     | 14 | 44975052  | Missense    | A | G | 0.062 | p.L380P     |
| 151  | <i>FSTL5</i>        | 56884     | 4  | 162459386 | Missense    | G | A | 0.122 | p.A415V     |
| 151  | <i>FUT1</i>         | 2523      | 19 | 49253779  | Missense    | C | T | 0.082 | p.E254K     |
| 151  | <i>GAL3ST3</i>      | 89792     | 11 | 65810064  | Missense    | C | T | 0.286 | p.G404S     |
| 151  | <i>GNL3</i>         | 26354     | 3  | 52727257  | Missense    | G | A | 0.051 | p.V355M     |
| 151  | <i>GRIN2B</i>       | 2904      | 12 | 13761578  | Missense    | C | G | 0.078 | p.E657Q     |
| 151  | <i>HEG1</i>         | 57493     | 3  | 124731689 | Missense    | T | A | 0.068 | p.T912S     |
| 151  | <i>HNRNPA3</i>      | 220988    | 2  | 178081295 | Missense    | G | C | 0.375 | p.E206D     |
| 151  | <i>IGSF22</i>       | 283284    | 11 | 18738329  | Missense    | C | T | 0.096 | p.E398K     |
| 151  | <i>ITIH4</i>        | 3700      | 3  | 52852272  | Splice_Site | C | T | 0.182 | c.2179+1G>A |
| 151  | <i>KCTD3</i>        | 51133     | 1  | 215793652 | Missense    | G | A | 0.122 | p.V714I     |
| 151  | <i>KRT76</i>        | 51350     | 12 | 53165980  | Missense    | G | T | 0.217 | p.N345K     |
| 151  | <i>LACCI</i>        | 144811    | 13 | 44457925  | Missense    | A | G | 0.107 | p.I254V     |
| 151  | <i>LAMA2</i>        | 3908      | 6  | 129714390 | Missense    | C | A | 0.06  | p.T1812N    |
| 151  | <i>.OCI0012908:</i> | 100129083 | 19 | 51920635  | Missense    | C | G | 0.08  | p.C41S      |
| 151  | <i>LRP2</i>         | 4036      | 2  | 170003432 | Missense    | T | G | 0.054 | p.I4210L    |
| 151  | <i>MEIG1</i>        | 644890    | 10 | 15008493  | Missense    | A | C | 0.103 | p.K9T       |
| 151  | <i>MKI67</i>        | 4288      | 10 | 129911856 | Missense    | C | G | 0.071 | p.E497D     |
| 151  | <i>MKI67</i>        | 4288      | 10 | 129903016 | Missense    | T | C | 0.052 | p.N2363S    |
| 151  | <i>MKI67</i>        | 4288      | 10 | 129905429 | Missense    | C | T | 0.043 | p.V1559M    |
| 151  | <i>MKKS</i>         | 8195      | 20 | 10386013  | Missense    | C | A | 0.061 | p.G532V     |
| 151  | <i>MS4A14</i>       | 84689     | 11 | 60184277  | Missense    | A | C | 0.06  | p.Q645H     |
| 151  | <i>MUC19</i>        | 283463    | 12 | 40837264  | Splice_Site | T | C | 0.051 | c.4212+2T>C |
| 151  | <i>MUC6</i>         | 4588      | 11 | 1017789   | Missense    | A | C | 0.13  | p.M1671R    |
| 151  | <i>NLRP9</i>        | 338321    | 19 | 56249615  | Missense    | G | C | 0.086 | p.I42M      |
| 151  | <i>OR10A7</i>       | 121364    | 12 | 55615094  | Missense    | G | A | 0.04  | p.G96S      |

|     |                     |           |    |           |                 |   |    |       |             |
|-----|---------------------|-----------|----|-----------|-----------------|---|----|-------|-------------|
| 151 | <i>OR10H3</i>       | 26532     | 19 | 15852242  | Missense        | C | A  | 0.06  | p.L14I      |
| 151 | <i>OR10S1</i>       | 219873    | 11 | 123847596 | Missense        | G | T  | 0.068 | p.P268Q     |
| 151 | <i>OR2A25</i>       | 392138    | 7  | 143771937 | Missense        | G | C  | 0.073 | p.A209P     |
| 151 | <i>OR2F2</i>        | 135948    | 7  | 143632693 | Missense        | A | T  | 0.186 | p.H123L     |
| 151 | <i>OR4D9</i>        | 390199    | 11 | 59283152  | Missense        | A | G  | 0.15  | p.Y256C     |
| 151 | <i>OR52N5</i>       | 390075    | 11 | 5799468   | Missense        | C | T  | 0.091 | p.V133I     |
| 151 | <i>OR6K3</i>        | 391114    | 1  | 158687896 | Missense        | C | T  | 0.077 | p.G4R       |
| 151 | <i>PALM2</i>        | 114299    | 9  | 112705460 | Missense        | G | A  | 0.173 | p.G331S     |
| 151 | <i>PCDH18</i>       | 54510     | 4  | 138450874 | Missense        | A | C  | 0.254 | p.M790R     |
| 151 | <i>PCDHA5</i>       | 56143     | 5  | 140249527 | Missense        | C | T  | 0.185 | p.S280F     |
| 151 | <i>PKD1</i>         | 5163      | 2  | 173429230 | Splice_Site     | G | A  | 0.081 | c.411-1G>A  |
| 151 | <i>PDZRN4</i>       | 29951     | 12 | 41966304  | Missense        | G | A  | 0.084 | p.E575K     |
| 151 | <i>PEMT</i>         | 10400     | 17 | 17409601  | Missense        | G | A  | 0.097 | p.T161M     |
| 151 | <i>PI4KA</i>        | 5297      | 22 | 21161673  | Missense        | C | T  | 0.156 | p.R382H     |
| 151 | <i>PITRM1</i>       | 10531     | 10 | 3202065   | Missense        | T | C  | 0.062 | p.I328V     |
| 151 | <i>PKD1L2</i>       | 114780    | 16 | 81253745  | Missense        | C | G  | 0.068 | p.K77N      |
| 151 | <i>PKD1L2</i>       | 114780    | 16 | 81253759  | Missense        | A | G  | 0.067 | p.W73R      |
| 151 | <i>PLK4</i>         | 10733     | 4  | 128814964 | Missense        | G | T  | 0.042 | p.E830D     |
| 151 | <i>PLXNA2</i>       | 5362      | 1  | 208225726 | Missense        | C | T  | 0.185 | p.G980E     |
| 151 | <i>POLE2</i>        | 5427      | 14 | 50122413  | Missense        | C | G  | 0.227 | p.E302Q     |
| 151 | <i>POU6F2</i>       | 11281     | 7  | 39500263  | Missense        | A | G  | 0.295 | p.Q507R     |
| 151 | <i>PTPNI</i>        | 5770      | 20 | 49195089  | Missense        | G | A  | 0.159 | p.G209R     |
| 151 | <i>ROBO2</i>        | 6092      | 3  | 77684138  | Missense        | G | A  | 0.14  | p.G1358E    |
| 151 | <i>RP11-87M18.2</i> |           | X  | 36403036  | Missense        | A | G  | 0.071 | p.H606R     |
| 151 | <i>RBP1</i>         | 6238      | 20 | 17600357  | Missense        | G | A  | 0.082 | p.S766L     |
| 151 | <i>SASS6</i>        | 163786    | 1  | 100575933 | Missense        | G | A  | 0.057 | p.A259V     |
| 151 | <i>SCGB1D1</i>      | 10648     | 11 | 61957776  | Missense        | T | A  | 0.103 | p.L7H       |
| 151 | <i>SHROOM3</i>      | 57619     | 4  | 77675505  | Missense        | C | T  | 0.059 | p.P1290L    |
| 151 | <i>SLC25A43</i>     | 203427    | X  | 118587003 | Missense        | C | T  | 0.13  | p.P334L     |
| 151 | <i>SLFN5</i>        | 162394    | 17 | 33592621  | Missense        | C | T  | 0.047 | p.A797V     |
| 151 | <i>SMAP2</i>        | 64744     | 1  | 40882598  | Missense        | C | G  | 0.22  | p.P332A     |
| 151 | <i>SPP1</i>         | 6696      | 4  | 88898941  | Missense        | C | T  | 0.067 | p.A24V      |
| 151 | <i>SVEP1</i>        | 79987     | 9  | 113168795 | Missense        | G | A  | 0.065 | p.R3029W    |
| 151 | <i>TLN2</i>         | 83660     | 15 | 63017302  | Missense        | C | T  | 0.294 | p.T1085M    |
| 151 | <i>TMEM104</i>      | 54868     | 17 | 72832569  | Missense        | G | A  | 0.067 | p.A412T     |
| 151 | <i>TMEM5</i>        | 10329     | 12 | 64199051  | Missense        | A | T  | 0.25  | p.M261L     |
| 151 | <i>TMX2</i>         | 51075     | 11 | 57505845  | Frame_Shift_Ins | A | AC | 0.147 | p.K128fs    |
| 151 | <i>TTC21B</i>       | 79809     | 2  | 166744896 | Missense        | C | T  | 0.093 | p.G1118S    |
| 151 | <i>TTN</i>          | 7273      | 2  | 179398509 | Missense        | C | A  | 0.089 | p.G34278V   |
| 151 | <i>TTN</i>          | 7273      | 2  | 179404628 | Missense        | T | A  | 0.063 | p.I32722F   |
| 151 | <i>TUBG2</i>        | 27175     | 17 | 40818699  | Missense        | A | G  | 0.049 | p.M413V     |
| 151 | <i>UGT3A2</i>       | 167127    | 5  | 36049012  | Missense        | T | G  | 0.12  | p.K274N     |
| 151 | <i>VWDE</i>         | 221806    | 7  | 12406989  | Missense        | C | G  | 0.067 | p.K964N     |
| 151 | <i>WAPAL</i>        | 23063     | 10 | 88277457  | Missense        | C | T  | 0.051 | p.V124I     |
| 151 | <i>WDR87</i>        | 83889     | 19 | 38384356  | Missense        | C | T  | 0.245 | p.V624M     |
| 151 | <i>XIRP2</i>        | 129446    | 2  | 168115668 | Nonsense        | T | A  | 0.131 | p.L904X     |
| 151 | <i>ZIM3</i>         | 114026    | 19 | 57646570  | Missense        | T | C  | 0.091 | p.I379V     |
| 151 | <i>ZNF197</i>       | 10168     | 3  | 44683542  | Missense        | C | T  | 0.061 | p.A307V     |
| 151 | <i>ZNF264</i>       | 9422      | 19 | 57723007  | Missense        | G | C  | 0.053 | p.R181T     |
| 151 | <i>ZNF264</i>       | 9422      | 19 | 57723013  | Missense        | G | A  | 0.05  | p.R183H     |
| 151 | <i>ZNF365</i>       | 22891     | 10 | 64159333  | Missense        | G | T  | 0.097 | p.A337S     |
| 151 | <i>ZNF610</i>       | 162963    | 19 | 52869278  | Missense        | G | C  | 0.085 | p.R216P     |
| 151 | <i>ZNF624</i>       | 57547     | 17 | 16527795  | Missense        | C | A  | 0.063 | p.K135N     |
| 149 | <i>ABCA8</i>        | 10351     | 17 | 66879946  | Missense        | C | G  | 0.114 | p.K1231N    |
| 149 | <i>ACAN</i>         | 176       | 15 | 89382175  | Missense        | T | G  | 0.359 | p.L118V     |
| 149 | <i>ACSM2A</i>       | 123876    | 16 | 20494408  | Missense        | C | T  | 0.087 | p.S513L     |
| 149 | <i>ADAMTS18</i>     | 170692    | 16 | 77401545  | Missense        | A | G  | 0.058 | p.Y191H     |
| 149 | <i>AGO3</i>         | 192669    | 1  | 36474632  | Missense        | A | C  | 0.769 | p.Y339S     |
| 149 | <i>ALK</i>          | 238       | 2  | 29416481  | Missense        | T | C  | 0.044 | p.K1491R    |
| 149 | <i>ARRDC3</i>       | 57561     | 5  | 90669563  | Nonsense        | G | A  | 0.217 | p.Q376X     |
| 149 | <i>ATP13A5</i>      | 344905    | 3  | 193081122 | Missense        | G | T  | 0.062 | p.S96Y      |
| 149 | <i>ATP8B4</i>       | 79895     | 15 | 50226313  | Missense        | G | T  | 0.052 | p.H452N     |
| 149 | <i>AUTS2</i>        | 26053     | 7  | 70228020  | Missense        | G | T  | 0.067 | p.A303S     |
| 149 | <i>AXIN2</i>        | 8313      | 17 | 63554591  | Missense        | G | A  | 0.1   | p.P50S      |
| 149 | <i>BDP1</i>         | 55814     | 5  | 70806649  | Missense        | T | A  | 0.059 | p.F1244I    |
| 149 | <i>BDP1</i>         | 55814     | 5  | 70806457  | Missense        | G | A  | 0.052 | p.G1180S    |
| 149 | <i>BHMT2</i>        | 23743     | 5  | 78379627  | Missense        | G | A  | 0.111 | p.G320S     |
| 149 | <i>BIRC3</i>        | 330       | 11 | 102196019 | Missense        | A | G  | 0.038 | p.K260R     |
| 149 | <i>C10orf71</i>     | 118461    | 10 | 50531972  | Missense        | A | C  | 0.064 | p.D461A     |
| 149 | <i>C17orf102</i>    | 400591    | 17 | 32904586  | Missense        | C | T  | 0.057 | p.R155K     |
| 149 | <i>C17orf77</i>     | 146723    | 17 | 72588326  | Missense        | A | C  | 0.062 | p.R47S      |
| 149 | <i>C3orf20</i>      | 84077     | 3  | 14755617  | Missense        | C | G  | 0.091 | p.L422V     |
| 149 | <i>C3orf20</i>      | 84077     | 3  | 14755572  | Missense        | A | G  | 0.089 | p.I407V     |
| 149 | <i>C7orf72</i>      | 100130988 | 7  | 50180960  | Missense        | A | C  | 0.237 | p.K354T     |
| 149 | <i>CAND2</i>        | 23066     | 3  | 12858028  | Missense        | T | C  | 0.083 | p.S533P     |
| 149 | <i>CASD1</i>        | 64921     | 7  | 94174854  | Splice_Site     | T | C  | 0.045 | c.1477-3T>C |
| 149 | <i>CCDC90B</i>      | 60492     | 11 | 82996986  | Missense        | A | C  | 0.069 | p.F10L      |
| 149 | <i>CDCA2</i>        | 157313    | 8  | 25364834  | Missense        | A | T  | 0.063 | p.R884S     |
| 149 | <i>CDRT4</i>        | 284040    | 17 | 15341183  | Missense        | A | C  | 0.044 | p.H122Q     |
| 149 | <i>CENPBD1</i>      | 92806     | 16 | 90037828  | Missense        | G | A  | 0.069 | p.T168I     |

|     |                   |           |    |           |                 |      |   |       |              |
|-----|-------------------|-----------|----|-----------|-----------------|------|---|-------|--------------|
| 149 | <i>CEP295</i>     | 85459     | 11 | 93431931  | Missense        | C    | A | 0.07  | p.Q1285K     |
| 149 | <i>CFAP46</i>     | 54777     | 10 | 134748331 | Missense        | C    | T | 0.079 | p.S264N      |
| 149 | <i>CHGB</i>       | 1114      | 20 | 5903388   | Missense        | A    | C | 0.057 | p.N200H      |
| 149 | <i>CISD3</i>      | 284106    | 17 | 36889559  | Missense        | C    | T | 0.065 | p.R79C       |
| 149 | <i>CLTCL1</i>     | 8218      | 22 | 19184095  | Missense        | T    | C | 0.074 | p.M1316V     |
| 149 | <i>CNTN5</i>      | 53942     | 11 | 100226883 | Missense        | T    | A | 0.038 | p.S1079T     |
| 149 | <i>COA6</i>       | 388753    | 1  | 234509259 | Missense        | G    | C | 0.083 | p.S16T       |
| 149 | <i>COIL</i>       | 8161      | 17 | 55038196  | Missense        | T    | C | 0.263 | p.E62G       |
| 149 | <i>COL24A1</i>    | 255631    | 1  | 86488232  | Missense        | G    | A | 0.047 | p.P731S      |
| 149 | <i>COL28A1</i>    | 340267    | 7  | 7495735   | Missense        | T    | C | 0.061 | p.I437M      |
| 149 | <i>COL6A6</i>     | 131873    | 3  | 130361856 | Missense        | G    | A | 0.077 | p.R1739Q     |
| 149 | <i>COL9A1</i>     | 1297      | 6  | 71004064  | Missense        | C    | A | 0.141 | p.A168S      |
| 149 | <i>CST5</i>       | 1473      | 20 | 23860178  | Missense        | A    | G | 0.059 | p.C46R       |
| 149 | <i>CTC1</i>       | 80169     | 17 | 8132763   | Missense        | T    | C | 0.107 | p.I1005V     |
| 149 | <i>CTNNA3</i>     | 29119     | 10 | 67680352  | Missense        | G    | C | 0.125 | p.I808M      |
| 149 | <i>CXorf67</i>    | 340602    | X  | 51150032  | Missense        | C    | T | 0.105 | p.S55L       |
| 149 | <i>CYLC2</i>      | 1539      | 9  | 105767901 | Missense        | G    | A | 0.2   | p.D330N      |
| 149 | <i>DCHS2</i>      | 54798     | 4  | 155157430 | Missense        | T    | G | 0.047 | p.N2337H     |
| 149 | <i>DNAH17</i>     | 8632      | 17 | 76528790  | Missense        | A    | G | 0.122 | p.I963T      |
| 149 | <i>DNAH17</i>     | 8632      | 17 | 76503593  | Missense        | T    | C | 0.073 | p.T1511A     |
| 149 | <i>DSEL</i>       | 92126     | 18 | 65181638  | Missense        | C    | T | 0.041 | p.G80R       |
| 149 | <i>DUSP27</i>     | 92235     | 1  | 167095881 | Missense        | G    | A | 0.085 | p.A505T      |
| 149 | <i>DUSP27</i>     | 92235     | 1  | 167097739 | Missense        | C    | A | 0.047 | p.T1124N     |
| 149 | <i>DYSF</i>       | 8291      | 2  | 71908233  | Missense        | G    | C | 0.1   | p.D2056H     |
| 149 | <i>EDDM3B</i>     | 64184     | 14 | 21238322  | Missense        | C    | G | 0.082 | p.L5V        |
| 149 | <i>EEF1D</i>      | 1936      | 8  | 144671956 | Missense        | G    | A | 0.081 | p.A99V       |
| 149 | <i>ELP2</i>       | 55250     | 18 | 33725931  | Missense        | G    | A | 0.071 | p.V370M      |
| 149 | <i>EPRS</i>       | 2058      | 1  | 220156704 | Missense        | T    | C | 0.064 | p.I1043V     |
| 149 | <i>ERMARD</i>     | 55780     | 6  | 170176467 | Missense        | A    | G | 0.071 | p.K520E      |
| 149 | <i>ETAA1</i>      | 54465     | 2  | 67631831  | Missense        | G    | A | 0.034 | p.E673K      |
| 149 | <i>EYS</i>        | 346007    | 6  | 65622463  | Missense        | A    | G | 0.049 | p.L852P      |
| 149 | <i>FAM200B</i>    | 285550    | 4  | 15689928  | Missense        | G    | A | 0.05  | p.S443N      |
| 149 | <i>FAM221A</i>    | 340277    | 7  | 23737891  | Missense        | A    | G | 0.079 | p.S240G      |
| 149 | <i>FAM83H</i>     | 286077    | 8  | 144809376 | In_Frame_Del    | GCGC | G | 0.667 | p.751_752del |
| 149 | <i>FBXO7</i>      | 25793     | 22 | 32875190  | Missense        | G    | A | 0.095 | p.M115I      |
| 149 | <i>FCRL3</i>      | 115352    | 1  | 157667057 | Nonsense        | C    | T | 0.093 | p.W239X      |
| 149 | <i>FDXR</i>       | 2232      | 17 | 72860653  | Missense        | G    | A | 0.103 | p.R282W      |
| 149 | <i>FOXN1</i>      | 8456      | 17 | 26851602  | Missense        | C    | T | 0.089 | p.R69C       |
| 149 | <i>FSP12</i>      | 401024    | 2  | 186672866 | Missense        | G    | T | 0.085 | p.S6367I     |
| 149 | <i>FYB</i>        | 2533      | 5  | 39119723  | Missense        | C    | A | 0.05  | p.V718F      |
| 149 | <i>GDPD4</i>      | 220032    | 11 | 76990447  | Splice_Site     | GA   | G | 0.25  | c.54-4T>-    |
| 149 | <i>GJA9-MYCBP</i> | 100527950 | 1  | 39340282  | Missense        | C    | T | 0.061 | p.V497I      |
| 149 | <i>GNAQ</i>       | 2776      | 9  | 80537112  | Missense        | T    | A | 0.17  | p.T96S       |
| 149 | <i>GNAQ</i>       | 2776      | 9  | 80537095  | Nonsense        | G    | T | 0.13  | p.Y101X      |
| 149 | <i>GOLGB1</i>     | 2804      | 3  | 121414061 | Missense        | C    | T | 0.043 | p.G1765D     |
| 149 | <i>GOLGB1</i>     | 2804      | 3  | 121415720 | Missense        | T    | C | 0.042 | p.Y1212C     |
| 149 | <i>GPC4</i>       | 2239      | X  | 132437337 | Missense        | G    | A | 0.1   | p.A442V      |
| 149 | <i>GPR124</i>     | 25960     | 8  | 37692878  | Missense        | G    | A | 0.136 | p.G599R      |
| 149 | <i>GPR15</i>      | 2838      | 3  | 98250986  | Missense        | C    | T | 0.045 | p.P37S       |
| 149 | <i>HDAC6</i>      | 10013     | X  | 48661113  | Missense        | G    | A | 0.071 | p.G5D        |
| 149 | <i>HEATR1</i>     | 55127     | 1  | 236718620 | Missense        | T    | C | 0.086 | p.N1967D     |
| 149 | <i>HEATR1</i>     | 55127     | 1  | 236749649 | Missense        | T    | C | 0.065 | p.M607V      |
| 149 | <i>HECTD4</i>     | 283450    | 12 | 112688167 | Missense        | A    | C | 0.692 | p.V1110G     |
| 149 | <i>HIF3A</i>      | 64344     | 19 | 46823702  | Missense        | A    | G | 0.12  | p.Q343R      |
| 149 | <i>HKDC1</i>      | 80201     | 10 | 71026510  | Missense        | C    | A | 0.053 | p.N917K      |
| 149 | <i>HSPA6</i>      | 3310      | 1  | 161495040 | Missense        | C    | T | 0.07  | p.L198F      |
| 149 | <i>HSPA8</i>      | 3312      | 11 | 122929401 | Frame_Shift_Del | ATT  | A | 0.241 | p.N487fs     |
| 149 | <i>HTR4</i>       | 3360      | 5  | 147889136 | Missense        | C    | G | 0.19  | p.R320T      |
| 149 | <i>IDO2</i>       | 169355    | 8  | 39872935  | Nonsense        | T    | A | 0.071 | p.Y359X      |
| 149 | <i>IFNGR2</i>     | 3460      | 21 | 34787312  | Missense        | A    | G | 0.114 | p.Q64R       |
| 149 | <i>IFT74</i>      | 80173     | 9  | 26978170  | Missense        | A    | G | 0.079 | p.I55M       |
| 149 | <i>IGFNI</i>      | 91156     | 1  | 201170855 | Missense        | C    | G | 0.318 | p.N214K      |
| 149 | <i>IL18R1</i>     | 8809      | 2  | 102992516 | Missense        | A    | G | 0.1   | p.I206M      |
| 149 | <i>IL4I1</i>      | 259307    | 19 | 50412217  | Missense        | C    | G | 0.156 | p.S283T      |
| 149 | <i>ISG15</i>      | 9636      | 1  | 949608    | Missense        | G    | A | 0.062 | p.S83N       |
| 149 | <i>KCNJ11</i>     | 3767      | 11 | 17409572  | Missense        | T    | C | 0.125 | p.K23E       |
| 149 | <i>KCNJ15</i>     | 3772      | 21 | 39671476  | Missense        | G    | A | 0.045 | p.G98D       |
| 149 | <i>KIAA1210</i>   | 57481     | X  | 118222360 | Missense        | T    | A | 0.151 | p.I945F      |
| 149 | <i>KIAA1407</i>   | 57577     | 3  | 113720517 | Missense        | T    | A | 0.043 | p.E696D      |
| 149 | <i>KIAA1522</i>   | 57648     | 1  | 33231380  | Missense        | T    | G | 0.206 | p.F4V        |
| 149 | <i>KLHL15</i>     | 80311     | X  | 24007151  | Splice_Site     | A    | G | 0.13  | c.706-4T>C   |
| 149 | <i>KLK1</i>       | 3816      | 19 | 51323232  | Missense        | T    | C | 0.073 | p.K186E      |
| 149 | <i>KLK4</i>       | 9622      | 19 | 51412668  | Missense        | A    | C | 0.16  | p.S22A       |
| 149 | <i>KLRF2</i>      | 100431172 | 12 | 10041364  | Missense        | G    | A | 0.046 | p.V68I       |
| 149 | <i>KMT2D</i>      | 8085      | 12 | 49431915  | Nonsense        | G    | T | 0.077 | p.S3075X     |
| 149 | <i>KRT86</i>      | 3892      | 12 | 52699033  | Missense        | G    | A | 0.179 | p.V249I      |
| 149 | <i>KRTAP16-1</i>  | 100505753 | 17 | 39464736  | Missense        | C    | G | 0.067 | p.S257T      |
| 149 | <i>KRTAP29-1</i>  | 100533177 | 17 | 39458893  | Missense        | G    | A | 0.043 | p.R71C       |
| 149 | <i>LAMB1</i>      | 3912      | 7  | 107603453 | Missense        | C    | G | 0.114 | p.G585A      |
| 149 | <i>LARP7</i>      | 51574     | 4  | 113565835 | Missense        | G    | A | 0.056 | p.E11K       |

|     |                     |           |    |           |             |   |    |       |             |
|-----|---------------------|-----------|----|-----------|-------------|---|----|-------|-------------|
| 149 | <i>LDLRAD2</i>      | 401944    | 1  | 22141206  | Missense    | A | C  | 0.2   | p.N134T     |
| 149 | <i>LDLRAP1</i>      | 26119     | 1  | 25889632  | Missense    | T | C  | 0.109 | p.S202P     |
| 149 | <i>LGR6</i>         | 59352     | 1  | 202287250 | Missense    | G | A  | 0.063 | p.A555T     |
| 149 | <i>LIPT2</i>        | 387787    | 11 | 74203230  | Missense    | A | G  | 0.153 | p.F216L     |
| 149 | <i>.OC10037922-</i> | 100379224 | 19 | 44610665  | Missense    | A | G  | 0.043 | p.M118V     |
| 149 | <i>.OC10037922-</i> | 100379224 | 19 | 44612231  | Missense    | A | G  | 0.041 | p.K640E     |
| 149 | <i>.OC10192714-</i> | 101927142 | 2  | 101591304 | Missense    | A | G  | 0.081 | p.T394A     |
| 149 | <i>.OC10192865-</i> | 101928651 | 5  | 60982841  | Missense    | G | A  | 0.055 | p.A57T      |
| 149 | <i>.OC10192929-</i> | 101929294 | 8  | 24339679  | Missense    | G | A  | 0.073 | p.V244M     |
| 149 | <i>LOC442028</i>    | 442028    | 2  | 95537572  | Missense    | C | T  | 0.211 | p.T83M      |
| 149 | <i>LOXHD1</i>       | 125336    | 18 | 44063598  | Missense    | G | A  | 0.089 | p.A2036V    |
| 149 | <i>LOXL1-AS1</i>    | 100287616 | 15 | 74219582  | Missense    | G | A  | 0.133 | p.G153D     |
| 149 | <i>LRT3</i>         | 345193    | 4  | 110773067 | Missense    | G | A  | 0.088 | p.S175N     |
| 149 | <i>LRRRC34</i>      | 151827    | 3  | 169514585 | Missense    | A | T  | 0.056 | p.L286I     |
| 149 | <i>LRRRC41</i>      | 10489     | 1  | 46746164  | Missense    | C | T  | 0.143 | p.V609I     |
| 149 | <i>LRRRC61</i>      | 65999     | 7  | 150034378 | Missense    | A | G  | 0.082 | p.N143S     |
| 149 | <i>MAGEB16</i>      | 139604    | X  | 35820795  | Missense    | A | G  | 0.111 | p.H161R     |
| 149 | <i>MAGEB6</i>       | 158809    | X  | 26213093  | Missense    | C | T  | 0.058 | p.A377V     |
| 149 | <i>MAGEC1</i>       | 9947      | X  | 140996239 | Nonsense    | G | T  | 0.18  | p.E1017X    |
| 149 | <i>MAGI1</i>        | 9223      | 3  | 65342217  | Missense    | G | A  | 0.239 | p.R1409C    |
| 149 | <i>MALRD1</i>       | 340895    | 10 | 19676561  | Missense    | G | A  | 0.082 | p.E1516K    |
| 149 | <i>MALRD1</i>       | 340895    | 10 | 19676553  | Missense    | A | G  | 0.069 | p.D1513G    |
| 149 | <i>MAPT</i>         | 4137      | 17 | 44068860  | Missense    | G | A  | 0.185 | p.R472Q     |
| 149 | <i>MARVELD2</i>     | 153562    | 5  | 68715310  | Missense    | C | T  | 0.046 | p.T33I      |
| 149 | <i>MAVS</i>         | 57506     | 20 | 3838441   | Missense    | C | G  | 0.111 | p.Q93E      |
| 149 | <i>MC1R</i>         | 4157      | 16 | 89986154  | Missense    | G | A  | 0.15  | p.R163Q     |
| 149 | <i>MC5R</i>         | 4161      | 18 | 13826391  | Missense    | C | G  | 0.038 | p.F209L     |
| 149 | <i>MCAT</i>         | 27349     | 22 | 43529314  | Missense    | G | C  | 0.088 | p.A303G     |
| 149 | <i>MLXIP</i>        | 22877     | 12 | 122617989 | Missense    | A | G  | 0.08  | p.E396G     |
| 149 | <i>MOV10L1</i>      | 54456     | 22 | 50547158  | Missense    | A | C  | 0.061 | p.K210Q     |
| 149 | <i>MRPL30</i>       | 51263     | 2  | 99812070  | Missense    | G | A  | 0.067 | p.A130T     |
| 149 | <i>MTA2</i>         | 9219      | 11 | 62362781  | Nonsense    | G | A  | 0.092 | p.R480X     |
| 149 | <i>MTMR11</i>       | 10903     | 1  | 149906413 | Missense    | T | C  | 0.047 | p.M159V     |
| 149 | <i>MUC16</i>        | 94025     | 19 | 9072313   | Missense    | A | G  | 0.048 | p.S5045P    |
| 149 | <i>MYADML2</i>      | 255275    | 17 | 79899272  | Missense    | A | G  | 0.286 | p.S116P     |
| 149 | <i>MYO3A</i>        | 53904     | 10 | 26463043  | Missense    | A | T  | 0.043 | p.T1284S    |
| 149 | <i>MYO9B</i>        | 4650      | 19 | 17213320  | Missense    | G | A  | 0.16  | p.A265T     |
| 149 | <i>NADK</i>         | 65220     | 1  | 1686040   | Missense    | G | T  | 0.073 | p.N407K     |
| 149 | <i>NBPF10</i>       | 100132406 | 1  | 145561334 | Missense    | C | T  | 0.06  | p.A341V     |
| 149 | <i>NIPBL</i>        | 25836     | 5  | 36985704  | Nonsense    | C | T  | 0.104 | p.R808X     |
| 149 | <i>NKAPL</i>        | 222698    | 6  | 28227436  | Missense    | A | G  | 0.055 | p.Y96C      |
| 149 | <i>NKAPL</i>        | 222698    | 6  | 28227604  | Missense    | C | A  | 0.041 | p.T152N     |
| 149 | <i>NLRP4</i>        | 147945    | 19 | 56369189  | Missense    | G | A  | 0.066 | p.A144T     |
| 149 | <i>NPEPPS</i>       | 9520      | 17 | 45664593  | Splice_Site | C | T  | 0.143 | c.981-3C>T  |
| 149 | <i>NT5C1B</i>       | 93034     | 2  | 18765974  | Missense    | G | A  | 0.095 | p.R237C     |
| 149 | <i>NUP214</i>       | 8021      | 9  | 134020092 | Missense    | C | T  | 0.045 | p.P574S     |
| 149 | <i>NXPE4</i>        | 54827     | 11 | 114441943 | Missense    | G | A  | 0.064 | p.A167V     |
| 149 | <i>OBSCN</i>        | 84033     | 1  | 228548197 | Missense    | G | A  | 0.174 | p.R6535H    |
| 149 | <i>OR13G1</i>       | 441933    | 1  | 247835674 | Missense    | G | A  | 0.049 | p.R224C     |
| 149 | <i>ORI4J1</i>       | 442191    | 6  | 29274486  | Missense    | T | C  | 0.043 | p.M7T       |
| 149 | <i>ORIJ2</i>        | 26740     | 9  | 125273574 | Missense    | G | A  | 0.072 | p.R165Q     |
| 149 | <i>OR2J2</i>        | 26707     | 6  | 29142064  | Missense    | A | G  | 0.043 | p.T218A     |
| 149 | <i>OR5H14</i>       | 403273    | 3  | 97868795  | Missense    | A | G  | 0.061 | p.Y189C     |
| 149 | <i>OR5H6</i>        | 79295     | 3  | 97983942  | Missense    | A | G  | 0.091 | p.T272A     |
| 149 | <i>OR5R1</i>        | 219479    | 11 | 56185159  | Missense    | A | G  | 0.045 | p.F184L     |
| 149 | <i>ORD4</i>         | 338662    | 11 | 123777736 | Missense    | T | C  | 0.05  | p.F200L     |
| 149 | <i>OTOP3</i>        | 347741    | 17 | 72937605  | Missense    | G | A  | 0.158 | p.R64Q      |
| 149 | <i>PANK4</i>        | 55229     | 1  | 2444414   | Missense    | G | A  | 0.093 | p.A547V     |
| 149 | <i>PCDHAI</i>       | 56147     | 5  | 140187620 | Missense    | A | G  | 0.248 | p.N283S     |
| 149 | <i>PCLO</i>         | 27445     | 7  | 82764539  | Missense    | G | C  | 0.131 | p.P776R     |
| 149 | <i>PCLO</i>         | 27445     | 7  | 82582846  | Missense    | C | T  | 0.044 | p.V2475I    |
| 149 | <i>PCLO</i>         | 27445     | 7  | 82544616  | Missense    | C | T  | 0.04  | p.G4229D    |
| 149 | <i>PCMI</i>         | 5108      | 8  | 17827260  | Splice_Site | A | AC | 0.152 | c.3584+3->C |
| 149 | <i>PCMI</i>         | 5108      | 8  | 17796382  | Missense    | A | G  | 0.037 | p.N159S     |
| 149 | <i>PER2</i>         | 8864      | 2  | 239155053 | Missense    | C | T  | 0.095 | p.G1244E    |
| 149 | <i>PFAS</i>         | 5198      | 17 | 8159232   | Splice_Site | A | G  | 0.077 | c.680+4A>G  |
| 149 | <i>PGLYRP2</i>      | 114770    | 19 | 15587185  | Missense    | C | T  | 0.06  | p.R99Q      |
| 149 | <i>PGM3</i>         | 5238      | 6  | 83880167  | Missense    | C | T  | 0.049 | p.D494N     |
| 149 | <i>PIGR</i>         | 5284      | 1  | 207112462 | Splice_Site | A | T  | 0.185 | c.388+2T>A  |
| 149 | <i>PKP3</i>         | 11187     | 11 | 397652    | Missense    | C | G  | 0.167 | p.A353G     |
| 149 | <i>PLA2G7</i>       | 7941      | 6  | 46679250  | Missense    | G | T  | 0.049 | p.H216N     |
| 149 | <i>PLEKHO2</i>      | 80301     | 15 | 65157482  | Missense    | C | T  | 0.07  | p.P290S     |
| 149 | <i>PLIN5</i>        | 440503    | 19 | 4529204   | Missense    | C | T  | 0.073 | p.R134Q     |
| 149 | <i>PLXND1</i>       | 23129     | 3  | 129279570 | Splice_Site | T | C  | 0.083 | c.4994-4A>G |
| 149 | <i>POLRIE</i>       | 64425     | 9  | 37501844  | Splice_Site | G | A  | 0.061 | c.1100+3G>A |
| 149 | <i>PPAN-P2RY11</i>  | 692312    | 19 | 10224548  | Missense    | G | A  | 0.095 | p.A507T     |
| 149 | <i>PPP1R3A</i>      | 5506      | 7  | 113519940 | Nonsense    | G | A  | 0.205 | p.Q403X     |
| 149 | <i>PPP4R1</i>       | 9989      | 18 | 9562042   | Missense    | C | T  | 0.043 | p.S576N     |
| 149 | <i>PRB2</i>         | 653247    | 12 | 11546309  | Missense    | C | G  | 0.2   | p.A235P     |
| 149 | <i>PRDM10</i>       | 56980     | 11 | 129794950 | Missense    | T | C  | 0.048 | p.T573A     |

|      |                   |           |    |           |             |   |   |       |             |
|------|-------------------|-----------|----|-----------|-------------|---|---|-------|-------------|
| 149  | <i>PRR25</i>      | 388199    | 16 | 855717    | Missense    | C | G | 0.118 | p.T92S      |
| 149  | <i>PRR30</i>      | 339779    | 2  | 27360534  | Missense    | G | A | 0.071 | p.R222C     |
| 149  | <i>PRSS48</i>     | 345062    | 4  | 152212486 | Missense    | C | T | 0.055 | p.R290C     |
| 149  | <i>PTPRG</i>      | 5793      | 3  | 62189201  | Missense    | G | A | 0.277 | p.E578K     |
| 149  | <i>PURG</i>       | 29942     | 8  | 30889848  | Missense    | T | C | 0.218 | p.K151E     |
| 149  | <i>RAB3GAP1</i>   | 22930     | 2  | 135893372 | Missense    | A | G | 0.046 | p.N598S     |
| 149  | <i>RARS2</i>      | 57038     | 6  | 88239266  | Missense    | T | C | 0.079 | p.K291R     |
| 149  | <i>RDH8</i>       | 50700     | 19 | 10131999  | Missense    | T | C | 0.219 | p.M222T     |
| 149  | <i>RDM1</i>       | 201299    | 17 | 34257637  | Missense    | T | C | 0.068 | p.H32R      |
| 149  | <i>REPIN1</i>     | 29803     | 7  | 150068371 | Missense    | T | C | 0.065 | p.L14P      |
| 149  | <i>REST</i>       | 5978      | 4  | 57797414  | Missense    | C | T | 0.057 | p.P797L     |
| 149  | <i>RHBDP2</i>     | 79651     | 17 | 74475975  | Missense    | C | A | 0.077 | p.A67S      |
| 149  | <i>RIF1</i>       | 55183     | 2  | 152331418 | Missense    | C | G | 0.066 | p.L2418V    |
| 149  | <i>RIF1</i>       | 55183     | 2  | 152311570 | Missense    | G | A | 0.049 | p.G836S     |
| 149  | <i>RIF1</i>       | 55183     | 2  | 152320118 | Missense    | G | A | 0.047 | p.V1362M    |
| 149  | <i>RMI1</i>       | 80010     | 9  | 86617265  | Missense    | A | G | 0.081 | p.N455S     |
| 149  | <i>RND3</i>       | 390       | 2  | 151326539 | Missense    | A | C | 0.203 | p.L233V     |
| 149  | <i>RTEL1</i>      | 51750     | 20 | 62326110  | Missense    | A | C | 0.125 | p.Q1066H    |
| 149  | <i>RTL1</i>       | 388015    | 14 | 101348584 | Missense    | C | G | 0.073 | p.E848Q     |
| 149  | <i>S100Z</i>      | 170591    | 5  | 76171252  | Missense    | A | C | 0.091 | p.E23A      |
| 149  | <i>SASH1</i>      | 23328     | 6  | 148865257 | Missense    | A | G | 0.062 | p.Q884R     |
| 149  | <i>SCML1</i>      | 6322      | X  | 17771387  | Missense    | G | A | 0.1   | p.G289R     |
| 149  | <i>SERPINB12</i>  | 89777     | 18 | 61233907  | Missense    | C | T | 0.05  | p.S294L     |
| 149  | <i>SLC16A1</i>    | 6566      | 1  | 113456546 | Missense    | A | T | 0.034 | p.D490E     |
| 149  | <i>SLC25A26</i>   | 115286    | 3  | 66287056  | Missense    | G | A | 0.06  | p.S41N      |
| 149  | <i>SLC25A37</i>   | 51312     | 8  | 23423669  | Missense    | A | G | 0.098 | p.I87V      |
| 149  | <i>SLITRK3</i>    | 22865     | 3  | 164906186 | Missense    | C | A | 0.13  | p.L811F     |
| 149  | <i>SORCS3</i>     | 22986     | 10 | 106974213 | Missense    | G | T | 0.047 | p.V797L     |
| 149  | <i>SPANXC</i>     | 64663     | X  | 140785696 | Missense    | T | C | 0.222 | p.K74E      |
| 149  | <i>ST20-MTHFS</i> | 100528021 | 15 | 80191343  | Missense    | G | A | 0.05  | p.P57L      |
| 149  | <i>STON2</i>      | 85439     | 14 | 81744736  | Missense    | A | G | 0.052 | p.S307P     |
| 149  | <i>SWT1</i>       | 54823     | 1  | 185171869 | Missense    | A | G | 0.067 | p.H536R     |
| 149  | <i>TECPRI</i>     | 25851     | 7  | 97852399  | Missense    | G | A | 0.133 | p.P944L     |
| 149  | <i>TEK</i>        | 7010      | 9  | 27220147  | Splice_Site | A | C | 0.172 | c.2756+4A>C |
| 149  | <i>TEKT4</i>      | 150483    | 2  | 95537622  | Missense    | A | G | 0.25  | p.S100G     |
| 149  | <i>TENM4</i>      | 26011     | 11 | 78380543  | Missense    | G | A | 0.267 | p.R2283W    |
| 149  | <i>TFPI2</i>      | 7980      | 7  | 93519584  | Missense    | G | A | 0.239 | p.R46W      |
| 149  | <i>TGFBR2</i>     | 7048      | 3  | 30713126  | Splice_Site | T | A | 0.037 | c.455-4T>A  |
| 149  | <i>THBS4</i>      | 7060      | 5  | 79375724  | Splice_Site | G | C | 0.064 | c.2512-4G>C |
| 149  | <i>TIGD2</i>      | 166815    | 4  | 90035549  | Missense    | A | G | 0.043 | p.H475R     |
| 149  | <i>TMEM132C</i>   | 92293     | 12 | 128899673 | Missense    | A | G | 0.051 | p.H161R     |
| 149  | <i>TMEM135</i>    | 65084     | 11 | 87013438  | Missense    | G | A | 0.07  | p.G218R     |
| 149  | <i>TMEM184A</i>   | 202915    | 7  | 1595068   | Missense    | G | A | 0.097 | p.A18V      |
| 149  | <i>TMPRSS9</i>    | 360200    | 19 | 2389872   | Missense    | G | C | 0.16  | p.S30T      |
| 149  | <i>TOP2B</i>      | 7155      | 3  | 25646268  | Missense    | G | A | 0.044 | p.T1486M    |
| 149  | <i>TOPBP1</i>     | 11073     | 3  | 133368362 | Missense    | T | G | 0.053 | p.K457Q     |
| 149  | <i>TRIM15</i>     | 89870     | 6  | 30140065  | Missense    | G | A | 0.064 | p.G446D     |
| 149  | <i>TRIM31</i>     | 11074     | 6  | 30071330  | Missense    | C | T | 0.052 | p.E421K     |
| 149  | <i>TRIML2</i>     | 205860    | 4  | 189013026 | Missense    | C | T | 0.062 | p.R222K     |
| 149  | <i>TRIOBP</i>     | 11078     | 22 | 38130656  | Missense    | G | C | 0.182 | p.G1438A    |
| 149  | <i>TRPM6</i>      | 140803    | 9  | 77502160  | Missense    | G | A | 0.158 | p.T2I       |
| 149  | <i>TSPEAR</i>     | 54084     | 21 | 46117838  | Missense    | C | G | 0.125 | p.S241C     |
| 149  | <i>TTN</i>        | 7273      | 2  | 179458591 | Missense    | C | T | 0.07  | p.R19479H   |
| 149  | <i>TXNDC2</i>     | 84203     | 18 | 9887546   | Missense    | G | A | 0.103 | p.G290D     |
| 149  | <i>UBE2J1</i>     | 51465     | 6  | 90039670  | Missense    | G | C | 0.058 | p.L229V     |
| 149  | <i>UBP1</i>       | 7342      | 3  | 33458266  | Missense    | T | C | 0.049 | p.N109S     |
| 149  | <i>UBQLNL</i>     | 143630    | 11 | 5536852   | Missense    | A | G | 0.048 | p.Y274H     |
| 149  | <i>ULK4</i>       | 54986     | 3  | 41756986  | Missense    | A | T | 0.043 | p.L844M     |
| 149  | <i>UNC79</i>      | 57578     | 14 | 94120117  | Missense    | T | G | 0.407 | p.V1900G    |
| 149  | <i>USP8</i>       | 9101      | 15 | 50784955  | Missense    | C | A | 0.122 | p.N764K     |
| 149  | <i>USP8</i>       | 9101      | 15 | 50784950  | Missense    | C | T | 0.1   | p.R763W     |
| 149  | <i>USP8</i>       | 9101      | 15 | 50785055  | Missense    | G | C | 0.043 | p.A798P     |
| 149  | <i>UVSSA</i>      | 57654     | 4  | 1377556   | Missense    | T | C | 0.073 | p.W622R     |
| 149  | <i>VARS2</i>      | 57176     | 6  | 30888161  | Missense    | T | C | 0.075 | p.W449R     |
| 149  | <i>VWA8</i>       | 23078     | 13 | 42442546  | Missense    | A | G | 0.085 | p.M383T     |
| 149  | <i>WAPAL</i>      | 23063     | 10 | 88277457  | Missense    | C | T | 0.054 | p.V124I     |
| 149  | <i>XYLT1</i>      | 64131     | 16 | 17202872  | Nonsense    | C | A | 0.229 | p.E854X     |
| 149  | <i>YIF1B</i>      | 90522     | 19 | 38800176  | Missense    | G | A | 0.138 | p.P53S      |
| 149  | <i>ZBTB22</i>     | 9278      | 6  | 33284348  | Missense    | G | A | 0.173 | p.R116C     |
| 149  | <i>ZDHHC23</i>    | 254887    | 3  | 113673125 | Missense    | A | G | 0.06  | p.K247R     |
| 149  | <i>ZFC3H1</i>     | 196441    | 12 | 72020212  | Missense    | G | C | 0.159 | p.S1382C    |
| 149  | <i>ZNF264</i>     | 9422      | 19 | 57723013  | Missense    | G | A | 0.044 | p.R183H     |
| 149  | <i>ZNF397</i>     | 84307     | 18 | 32834186  | Missense    | T | G | 0.04  | p.Q238P     |
| 149  | <i>ZNF529</i>     | 57711     | 19 | 37039069  | Missense    | A | C | 0.06  | p.L131V     |
| 149  | <i>ZNF680</i>     | 340252    | 7  | 63981559  | Missense    | T | C | 0.07  | p.N525D     |
| 149  | <i>ZNF764</i>     | 92595     | 16 | 30567162  | Missense    | C | T | 0.125 | p.V194I     |
| 149  | <i>ZNF880</i>     | 400713    | 19 | 52887437  | Missense    | A | C | 0.078 | p.N202H     |
| 149  | <i>ZNF880</i>     | 400713    | 19 | 52887427  | Missense    | A | C | 0.063 | p.R198S     |
| 9638 | <i>ANKLE1</i>     | 126549    | 19 | 17397501  | Missense    | T | G | 0.111 | p.L645V     |
| 9638 | <i>ATP13A5</i>    | 344905    | 3  | 193052783 | Missense    | C | A | 0.091 | p.G350V     |

|      |                    |           |    |           |             |   |   |       |             |
|------|--------------------|-----------|----|-----------|-------------|---|---|-------|-------------|
| 9638 | <i>BASP1</i>       | 10409     | 5  | 17275764  | Missense    | G | A | 0.277 | p.E147K     |
| 9638 | <i>BRF2</i>        | 55290     | 8  | 37702708  | Missense    | G | A | 0.151 | p.P187L     |
| 9638 | <i>BYSL</i>        | 705       | 6  | 41899280  | Missense    | G | A | 0.152 | p.G284E     |
| 9638 | <i>CPSF1</i>       | 29894     | 8  | 145624380 | Missense    | G | A | 0.219 | p.H506Y     |
| 9638 | <i>DCTN5</i>       | 84516     | 16 | 23672555  | Missense    | G | A | 0.254 | p.A101T     |
| 9638 | <i>DDX3X</i>       | 1654      | X  | 41205613  | Missense    | G | A | 0.719 | p.A483T     |
| 9638 | <i>DENND1A</i>     | 57706     | 9  | 126144544 | Missense    | C | T | 0.21  | p.D733N     |
| 9638 | <i>DNMBP</i>       | 23268     | 10 | 101645511 | Missense    | G | T | 0.185 | p.A1244D    |
| 9638 | <i>EGFL6</i>       | 25975     | X  | 13618120  | Missense    | C | T | 0.1   | p.R103W     |
| 9638 | <i>ENAM</i>        | 10117     | 4  | 71510366  | Missense    | A | T | 0.068 | p.S1075C    |
| 9638 | <i>ESCO1</i>       | 114799    | 18 | 19154143  | Missense    | G | A | 0.068 | p.T221M     |
| 9638 | <i>EXOC2</i>       | 55770     | 6  | 629884    | Missense    | G | C | 0.086 | p.P125A     |
| 9638 | <i>FAM173A</i>     | 65990     | 16 | 771835    | Missense    | C | A | 0.046 | p.A101D     |
| 9638 | <i>FAM184B</i>     | 27146     | 4  | 17710691  | Missense    | C | T | 0.225 | p.V240M     |
| 9638 | <i>FZD1</i>        | 8321      | 7  | 90895963  | Missense    | G | A | 0.271 | p.A590T     |
| 9638 | <i>GATA4</i>       | 2626      | 8  | 11565846  | Missense    | G | A | 0.205 | p.A9T       |
| 9638 | <i>GBF1</i>        | 8729      | 10 | 104136145 | Nonsense    | C | T | 0.203 | p.R1334X    |
| 9638 | <i>GEM</i>         | 2669      | 8  | 95262720  | Nonsense    | G | A | 0.203 | p.R237X     |
| 9638 | <i>GPC6</i>        | 10082     | 13 | 94482467  | Missense    | C | A | 0.138 | p.T127N     |
| 9638 | <i>HPSE2</i>       | 60495     | 10 | 100219374 | Missense    | T | A | 0.043 | p.Y579F     |
| 9638 | <i>ITGA8</i>       | 8516      | 10 | 15590522  | Nonsense    | G | A | 0.176 | p.R938X     |
| 9638 | <i>KIAA0513</i>    | 9764      | 16 | 85112529  | Splice_Site | A | G | 0.189 | c.824-2A>G  |
| 9638 | <i>KIR2DL1</i>     | 3802      | 19 | 55286665  | Missense    | T | A | 0.159 | p.L140Q     |
| 9638 | <i>KLHL38</i>      | 340359    | 8  | 124665039 | Missense    | C | A | 0.143 | p.R43L      |
| 9638 | <i>KRTAP4-11</i>   | 653240    | 17 | 39274291  | Missense    | T | C | 0.333 | p.M93V      |
| 9638 | <i>LINGO2</i>      | 158038    | 9  | 27949105  | Missense    | T | C | 0.068 | p.N522S     |
| 9638 | <i>MAGEB16</i>     | 139604    | X  | 35820696  | Missense    | G | A | 0.1   | p.C128Y     |
| 9638 | <i>MUC17</i>       | 140453    | 7  | 100681211 | Missense    | G | C | 0.077 | p.V2172L    |
| 9638 | <i>MUC4</i>        | 4585      | 3  | 195505664 | Missense    | G | A | 0.062 | p.P4263S    |
| 9638 | <i>MYHAS</i>       | 100128560 | 17 | 10346774  | Missense    | C | T | 0.181 | p.R1913Q    |
| 9638 | <i>MYO6</i>        | 4646      | 6  | 76566846  | Missense    | C | T | 0.154 | p.A419V     |
| 9638 | <i>NKX6-1</i>      | 4825      | 4  | 85414591  | Missense    | T | C | 0.198 | p.N319D     |
| 9638 | <i>NOTCH3</i>      | 4854      | 19 | 15289953  | Missense    | G | A | 0.158 | p.R1201C    |
| 9638 | <i>OR51G1</i>      | 79324     | 11 | 4944647   | Missense    | T | G | 0.4   | p.K308T     |
| 9638 | <i>OR52E8</i>      | 390079    | 11 | 5877979   | Nonstop     | T | A | 0.07  | p.X318Y     |
| 9638 | <i>OR6N1</i>       | 128372    | 1  | 158735595 | Missense    | C | T | 0.08  | p.R293H     |
| 9638 | <i>ORC4</i>        | 5000      | 2  | 148716428 | Missense    | T | C | 0.286 | p.N78S      |
| 9638 | <i>PCK2</i>        | 5106      | 14 | 24572931  | Missense    | C | T | 0.092 | p.R561W     |
| 9638 | <i>PHC1</i>        | 1911      | 12 | 9085218   | Nonsense    | C | T | 0.167 | p.Q389X     |
| 9638 | <i>PKD1L1</i>      | 168507    | 7  | 47867021  | Missense    | G | C | 0.199 | p.P2261A    |
| 9638 | <i>PLD1</i>        | 5337      | 3  | 171395488 | Splice_Site | T | G | 0.375 | c.1868-4A>C |
| 9638 | <i>PUS7</i>        | 54517     | 7  | 105108822 | Missense    | C | A | 0.1   | p.G496V     |
| 9638 | <i>RYR3</i>        | 6263      | 15 | 33954413  | Missense    | C | T | 0.25  | p.T1561M    |
| 9638 | <i>SLC1A5</i>      | 6510      | 19 | 47278793  | Missense    | C | T | 0.217 | p.A534T     |
| 9638 | <i>SLC26A4</i>     | 5172      | 7  | 107335127 | Missense    | T | C | 0.077 | p.I468T     |
| 9638 | <i>SLC27A5</i>     | 10998     | 19 | 59022291  | Missense    | C | T | 0.093 | p.R232Q     |
| 9638 | <i>SLC28A1</i>     | 9154      | 15 | 85467279  | Missense    | G | T | 0.206 | p.V341F     |
| 9638 | <i>SSH2</i>        | 85464     | 17 | 27998966  | Missense    | G | C | 0.246 | p.L266V     |
| 9638 | <i>TRIM56</i>      | 81844     | 7  | 100730966 | Missense    | G | A | 0.212 | p.D125N     |
| 9638 | <i>TRPM6</i>       | 140803    | 9  | 7737716   | Missense    | G | T | 0.27  | p.H1291N    |
| 9638 | <i>WDR91</i>       | 29062     | 7  | 134870946 | Missense    | T | C | 0.22  | p.D734G     |
| 9638 | <i>ZNF33B</i>      | 7582      | 10 | 43089179  | Missense    | G | T | 0.176 | p.H407N     |
| 9638 | <i>ZNF649-AS1</i>  | 101928571 | 19 | 52394377  | Nonsense    | G | A | 0.196 | p.R338X     |
| 9638 | <i>ZSCAN16-AS1</i> | 100129195 | 6  | 28097571  | Missense    | G | A | 0.292 | p.C297Y     |
| 9634 | <i>CATSPER1</i>    | 117144    | 11 | 65789246  | Missense    | T | C | 0.123 | p.N512D     |
| 9634 | <i>CERCAM</i>      | 51148     | 9  | 131198152 | Missense    | A | C | 0.153 | p.S586R     |
| 9634 | <i>CFAP46</i>      | 54777     | 10 | 134672644 | Missense    | C | A | 0.135 | p.R1769I    |
| 9634 | <i>CSMD2</i>       | 114784    | 1  | 34204872  | Missense    | C | T | 0.108 | p.S706N     |
| 9634 | <i>CYP2J2</i>      | 1573      | 1  | 60381701  | Missense    | C | A | 0.154 | p.L94F      |
| 9634 | <i>DNAH17</i>      | 8632      | 17 | 76422617  | Missense    | G | A | 0.132 | p.P4279L    |
| 9634 | <i>DOLPP1</i>      | 57171     | 9  | 131849037 | Missense    | G | A | 0.221 | p.V214I     |
| 9634 | <i>DSCAM</i>       | 1826      | 21 | 41719761  | Missense    | C | T | 0.115 | p.R349H     |
| 9634 | <i>FGFR1</i>       | 2260      | 8  | 38287254  | Missense    | C | T | 0.107 | p.V135I     |
| 9634 | <i>FSHR</i>        | 2492      | 2  | 49381414  | Missense    | G | T | 0.28  | p.A48D      |
| 9634 | <i>GABRR2</i>      | 2570      | 6  | 89967528  | Missense    | G | A | 0.14  | p.A420V     |
| 9634 | <i>GNAQ</i>        | 2776      | 9  | 80537112  | Missense    | T | A | 0.088 | p.T96S      |
| 9634 | <i>GNAQ</i>        | 2776      | 9  | 80537095  | Nonsense    | G | T | 0.065 | p.Y101X     |
| 9634 | <i>GRM6</i>        | 2916      | 5  | 178419057 | Missense    | C | A | 0.191 | p.A178S     |
| 9634 | <i>IPOS</i>        | 3843      | 13 | 98662459  | Nonsense    | C | G | 0.2   | p.S697X     |
| 9634 | <i>ITPR2</i>       | 3709      | 12 | 26839433  | Missense    | C | A | 0.086 | p.A377S     |
| 9634 | <i>KDM2A</i>       | 22992     | 11 | 67013588  | Splice_Site | G | A | 0.273 | c.1965+1G>A |
| 9634 | <i>KRTAP4-7</i>    | 100132476 | 17 | 39240819  | Missense    | C | G | 0.143 | p.L121V     |
| 9634 | <i>LAMB2</i>       | 3913      | 3  | 49167738  | Missense    | C | T | 0.155 | p.R384H     |
| 9634 | <i>LILRA1</i>      | 11024     | 19 | 55106288  | Missense    | A | C | 0.045 | p.I77L      |
| 9634 | <i>LMBRD1</i>      | 55788     | 6  | 70506702  | Splice_Site | T | C | 0.127 | c.69+3A>G   |
| 9634 | <i>LRRC49</i>      | 54839     | 15 | 71300939  | Missense    | A | C | 0.294 | p.K454T     |
| 9634 | <i>MAGED1</i>      | 9500      | X  | 51638851  | Missense    | C | T | 0.194 | p.R306C     |
| 9634 | <i>MUC21</i>       | 394263    | 6  | 30955179  | Missense    | G | C | 0.096 | p.E409D     |
| 9634 | <i>MUC21</i>       | 394263    | 6  | 30954485  | Missense    | G | A | 0.056 | p.S178N     |
| 9634 | <i>MUC3A</i>       | 4584      | 7  | 100550974 | Missense    | A | C | 0.119 | p.T519P     |



|      |                   |        |    |           |                 |    |   |       |            |
|------|-------------------|--------|----|-----------|-----------------|----|---|-------|------------|
| 9634 | <i>MUC5B</i>      | 727897 | 11 | 1262189   | Missense        | C  | T | 0.105 | p.T1360M   |
| 9634 | <i>MUC7</i>       | 4589   | 4  | 71347185  | Missense        | T  | C | 0.106 | p.S242P    |
| 9634 | <i>NBPF8</i>      | 728841 | 1  | 148025797 | Missense        | T  | A | 0.133 | p.K352M    |
| 9634 | <i>NRXN1</i>      | 9378   | 2  | 50149175  | Missense        | C  | A | 0.185 | p.Q1517H   |
| 9634 | <i>OGDHL</i>      | 55753  | 10 | 50960187  | Missense        | G  | A | 0.075 | p.R196C    |
| 9634 | <i>PAK2</i>       | 5062   | 3  | 196509577 | Missense        | C  | G | 0.1   | p.S20R     |
| 9634 | <i>POTEG</i>      | 404785 | 14 | 19553642  | Missense        | A  | G | 0.188 | p.S76G     |
| 9634 | <i>PRB2</i>       | 653247 | 12 | 11546749  | Missense        | T  | C | 0.103 | p.K88R     |
| 9634 | <i>RETSAT</i>     | 54884  | 2  | 85570857  | Missense        | G  | A | 0.095 | p.A533V    |
| 9634 | <i>RETSAT</i>     | 54884  | 2  | 85570849  | Missense        | C  | T | 0.068 | p.G536R    |
| 9634 | <i>RYR2</i>       | 6262   | 1  | 237819173 | Missense        | C  | A | 0.097 | p.A2673E   |
| 9634 | <i>SERPINB7</i>   | 8710   | 18 | 61471710  | Missense        | G  | T | 0.107 | p.E328D    |
| 9634 | <i>SLC20A2</i>    | 6575   | 8  | 42275345  | Missense        | C  | T | 0.122 | p.M645I    |
| 9634 | <i>SPTBN5</i>     | 51332  | 15 | 42144487  | Nonsense        | G  | A | 0.109 | p.Q3493X   |
| 9634 | <i>ST6GALNAC1</i> | 55808  | 17 | 74622824  | Missense        | C  | A | 0.046 | p.R275L    |
| 9634 | <i>TAF1A</i>      | 9015   | 1  | 222761824 | Missense        | T  | C | 0.112 | p.M28V     |
| 9634 | <i>TBC1D26</i>    | 353149 | 17 | 15641610  | Missense        | A  | G | 0.118 | p.Y99C     |
| 9634 | <i>TRIB3</i>      | 57761  | 20 | 368883    | Missense        | G  | A | 0.128 | p.E104K    |
| 9634 | <i>WDFY4</i>      | 57705  | 10 | 50109851  | Missense        | G  | T | 0.159 | p.C2510F   |
| 9634 | <i>ZNRF3</i>      | 84133  | 22 | 29445329  | Missense        | T  | C | 0.165 | p.M287T    |
| 9634 | <i>ZPLD1</i>      | 131368 | 3  | 102196348 | Missense        | G  | C | 0.152 | p.M394I    |
| 9626 | <i>ARID1B</i>     | 57492  | 6  | 157256690 | Missense        | G  | A | 0.138 | p.E673K    |
| 9626 | <i>BRD9</i>       | 65980  | 5  | 878525    | Missense        | T  | A | 0.091 | p.M406L    |
| 9626 | <i>CACNA1E</i>    | 777    | 1  | 181731752 | Missense        | G  | A | 0.046 | p.V1550M   |
| 9626 | <i>CCM2</i>       | 83605  | 7  | 45113105  | Missense        | A  | G | 0.075 | p.K284E    |
| 9626 | <i>CCSER1</i>     | 401145 | 4  | 91229489  | Missense        | C  | A | 0.067 | p.F18L     |
| 9626 | <i>DOCK8</i>      | 81704  | 9  | 368103    | Missense        | A  | T | 0.052 | p.M589L    |
| 9626 | <i>FGD2</i>       | 221472 | 6  | 36979483  | Missense        | T  | G | 0.542 | p.V127G    |
| 9626 | <i>GNAQ</i>       | 2776   | 9  | 80537112  | Missense        | T  | A | 0.068 | p.T96S     |
| 9626 | <i>GPR112</i>     | 139378 | X  | 135426656 | Missense        | C  | T | 0.056 | p.A264V    |
| 9626 | <i>LRRC46</i>     | 90506  | 17 | 45914313  | Missense        | G  | A | 0.069 | p.V265I    |
| 9626 | <i>MUC21</i>      | 394263 | 6  | 30955179  | Missense        | G  | C | 0.185 | p.E409D    |
| 9626 | <i>NKAPL</i>      | 222698 | 6  | 28228281  | Nonsense        | C  | T | 0.048 | p.R378X    |
| 9626 | <i>NOTUM</i>      | 147111 | 17 | 79915727  | Missense        | C  | A | 0.143 | p.G217V    |
| 9626 | <i>OR6C75</i>     | 390323 | 12 | 55759444  | Missense        | C  | G | 0.05  | p.Q184E    |
| 9626 | <i>PCDH15</i>     | 65217  | 10 | 55582472  | Missense        | A  | G | 0.037 | p.S1679P   |
| 9626 | <i>PCDHGA2</i>    | 56113  | 5  | 140718786 | Missense        | G  | C | 0.134 | p.S83T     |
| 9626 | <i>PCDHGA3</i>    | 56112  | 5  | 140730393 | Missense        | C  | T | 0.099 | p.P189L    |
| 9626 | <i>PCDHGA7</i>    | 56108  | 5  | 140866334 | Missense        | C  | A | 0.041 | p.Q532K    |
| 9626 | <i>PCMTD1</i>     | 115294 | 8  | 52733128  | Missense        | T  | G | 0.13  | p.N286T    |
| 9626 | <i>PGR</i>        | 5241   | 11 | 100998489 | Missense        | G  | A | 0.15  | p.A274V    |
| 9626 | <i>RNF2</i>       | 6045   | 1  | 185069041 | Missense        | G  | A | 0.103 | p.A286T    |
| 9626 | <i>SCCPDH</i>     | 51097  | 1  | 246887755 | Missense        | G  | C | 0.087 | p.V11L     |
| 9626 | <i>SEC31B</i>     | 25956  | 10 | 102269096 | Missense        | C  | G | 0.079 | p.A126P    |
| 9626 | <i>SLC6A5</i>     | 9152   | 11 | 20625882  | Missense        | A  | C | 0.109 | p.K197N    |
| 9626 | <i>SPDYE6</i>     | 729597 | 7  | 101988983 | Missense        | G  | A | 0.261 | p.P297L    |
| 9626 | <i>SPHKAP</i>     | 80309  | 2  | 228882809 | Missense        | G  | T | 0.066 | p.P921T    |
| 9626 | <i>TENM2</i>      | 57451  | 5  | 167303069 | Missense        | T  | G | 0.056 | p.V194G    |
| 9626 | <i>TMEM14B</i>    | 81853  | 6  | 10756728  | Missense        | C  | T | 0.098 | p.R108C    |
| 9626 | <i>UBR5</i>       | 51366  | 8  | 103297838 | Missense        | G  | A | 0.082 | p.S1796L   |
| 9626 | <i>USP8</i>       | 9101   | 15 | 50784950  | Missense        | C  | T | 0.125 | p.R763W    |
| 9626 | <i>USP8</i>       | 9101   | 15 | 50784955  | Missense        | C  | A | 0.118 | p.N764K    |
| 9626 | <i>ZNF227</i>     | 7770   | 19 | 44739059  | Missense        | A  | G | 0.113 | p.D159G    |
| 9624 | <i>A2M</i>        | 2      | 12 | 9244021   | Missense        | C  | A | 0.057 | p.A749S    |
| 9624 | <i>ABCC8</i>      | 6833   | 11 | 17418477  | Missense        | C  | A | 0.079 | p.A1370S   |
| 9624 | <i>ADAMTSL1</i>   | 92949  | 9  | 18776926  | Missense        | C  | T | 0.071 | p.P900L    |
| 9624 | <i>ANKRD22</i>    | 118932 | 10 | 90591731  | Missense        | A  | C | 0.5   | p.V25G     |
| 9624 | <i>ARHGAP25</i>   | 9938   | 2  | 69049941  | Missense        | T  | C | 0.059 | p.M557T    |
| 9624 | <i>ASH1L</i>      | 55870  | 1  | 155448155 | Missense        | C  | A | 0.198 | p.M1502I   |
| 9624 | <i>ASPM</i>       | 259266 | 1  | 197111871 | Missense        | C  | G | 0.131 | p.C504S    |
| 9624 | <i>BTC</i>        | 685    | 4  | 75695364  | Frame_Shift_Del | GA | G | 0.129 | p.G22fs    |
| 9624 | <i>CCDC90B</i>    | 60492  | 11 | 82984731  | Nonsense        | C  | A | 0.25  | p.E185X    |
| 9624 | <i>CDH19</i>      | 28513  | 18 | 64211304  | Missense        | G  | T | 0.182 | p.P373Q    |
| 9624 | <i>CETN1</i>      | 1068   | 18 | 580556    | Missense        | G  | A | 0.059 | p.A50T     |
| 9624 | <i>CHIT1</i>      | 1118   | 1  | 203186950 | Nonsense        | C  | T | 0.4   | p.W358X    |
| 9624 | <i>DCT</i>        | 1638   | 13 | 95121106  | Nonsense        | C  | T | 0.137 | p.W163X    |
| 9624 | <i>DEFB1</i>      | 1672   | 8  | 6728315   | Missense        | G  | T | 0.116 | p.S32Y     |
| 9624 | <i>DISP1</i>      | 84976  | 1  | 223165455 | Splice_Site     | G  | C | 0.102 | c.889+3G>C |
| 9624 | <i>FBXO10</i>     | 26267  | 9  | 37537688  | Missense        | A  | G | 0.083 | p.S280P    |
| 9624 | <i>IGFL1</i>      | 374918 | 19 | 46733771  | Missense        | G  | A | 0.114 | p.R107H    |
| 9624 | <i>KIF20B</i>     | 9585   | 10 | 91497912  | Missense        | A  | G | 0.091 | p.K1065R   |
| 9624 | <i>KPNA7</i>      | 402569 | 7  | 98790650  | Missense        | T  | G | 0.182 | p.T210P    |
| 9624 | <i>KRTAP9-8</i>   | 83901  | 17 | 39394482  | Missense        | T  | C | 0.286 | p.I60T     |
| 9624 | <i>LDHB</i>       | 3945   | 12 | 21791326  | Missense        | C  | G | 0.129 | p.S225T    |
| 9624 | <i>MAPK1</i>      | 5594   | 22 | 22127164  | Missense        | C  | T | 0.172 | p.E322K    |
| 9624 | <i>MCM6</i>       | 4175   | 2  | 136609088 | Missense        | G  | C | 0.149 | p.L601V    |
| 9624 | <i>MERTK</i>      | 10461  | 2  | 112754933 | Missense        | C  | T | 0.158 | p.A495V    |
| 9624 | <i>MYLK</i>       | 4638   | 3  | 123471350 | Missense        | G  | C | 0.136 | p.H67Q     |
| 9624 | <i>MYO10</i>      | 4651   | 5  | 16670671  | Missense        | C  | A | 0.06  | p.E1949D   |
| 9624 | <i>NCAM2</i>      | 4685   | 21 | 22746187  | Missense        | T  | C | 0.105 | p.L350P    |

|      |                     |           |    |           |                 |          |    |       |              |
|------|---------------------|-----------|----|-----------|-----------------|----------|----|-------|--------------|
| 9624 | <i>NPY2R</i>        | 4887      | 4  | 156135107 | Missense        | G        | T  | 0.092 | p.A6S        |
| 9624 | <i>NWD1</i>         | 284434    | 19 | 16870139  | Missense        | C        | T  | 0.09  | p.R490C      |
| 9624 | <i>ORSP2</i>        | 120065    | 11 | 7817732   | Missense        | A        | T  | 0.088 | p.F253Y      |
| 9624 | <i>PCDHB13</i>      | 56123     | 5  | 140594182 | Missense        | G        | A  | 0.067 | p.V163I      |
| 9624 | <i>PCNA</i>         | 5111      | 20 | 5095961   | Missense        | C        | G  | 0.12  | p.A252P      |
| 9624 | <i>PIP5K1L1</i>     | 138429    | 9  | 130692077 | Missense        | G        | A  | 0.078 | p.R40C       |
| 9624 | <i>PNKP</i>         | 11284     | 19 | 50370325  | Missense        | C        | T  | 0.077 | p.C46Y       |
| 9624 | <i>RNU6-71P</i>     | 100873774 | 6  | 56484342  | Missense        | G        | A  | 0.16  | p.A1497V     |
| 9624 | <i>RREB1</i>        | 6239      | 6  | 7247248   | Missense        | T        | C  | 0.054 | p.L1522P     |
| 9624 | <i>SLFN12L</i>      | 100506736 | 17 | 33807186  | Missense        | C        | G  | 0.097 | p.A15P       |
| 9624 | <i>TLN2</i>         | 83660     | 15 | 62985112  | Missense        | C        | A  | 0.071 | p.A396E      |
| 9624 | <i>ZNF233</i>       | 353355    | 19 | 44778405  | Missense        | A        | C  | 0.065 | p.K531T      |
| 9623 | <i>ARL15</i>        | 54622     | 5  | 53409226  | Missense        | G        | A  | 0.449 | p.R90W       |
| 9623 | <i>ASXL1</i>        | 171023    | 20 | 31021635  | Frame_Shift_Ins | G        | GT | 0.27  | p.R545fs     |
| 9623 | <i>BAZ2A</i>        | 11176     | 12 | 57009232  | Missense        | G        | A  | 0.311 | p.A101V      |
| 9623 | <i>CASC3</i>        | 22794     | 17 | 38324174  | Nonsense        | C        | T  | 0.333 | p.Q575X      |
| 9623 | <i>CCDC60</i>       | 160777    | 12 | 119942914 | Missense        | G        | A  | 0.338 | p.R230H      |
| 9623 | <i>CEMP1</i>        | 57214     | 15 | 81224312  | Missense        | C        | T  | 0.333 | p.R909C      |
| 9623 | <i>CLDN10</i>       | 9071      | 13 | 96205009  | In_Frame_Del    | TAGCACGC | T  | 0.244 | p.I_6del     |
| 9623 | <i>COL6A6</i>       | 131873    | 3  | 130281936 | Missense        | T        | G  | 0.378 | p.F30C       |
| 9623 | <i>CR1</i>          | 1378      | 1  | 207796417 | Splice_Site     | A        | C  | 0.323 | c.7352+4A>C  |
| 9623 | <i>CRB2</i>         | 286204    | 9  | 126133082 | Missense        | C        | T  | 0.344 | p.R584C      |
| 9623 | <i>FAM198A</i>      | 729085    | 3  | 43073996  | Missense        | C        | T  | 0.279 | p.R81C       |
| 9623 | <i>FBXO40</i>       | 51725     | 3  | 121340536 | Missense        | T        | C  | 0.063 | p.V87A       |
| 9623 | <i>FER1L6</i>       | 654463    | 8  | 125047601 | Missense        | T        | A  | 0.362 | p.S790R      |
| 9623 | <i>FHDC1</i>        | 85462     | 4  | 153896230 | Missense        | C        | T  | 0.276 | p.S596F      |
| 9623 | <i>FLNC</i>         | 2318      | 7  | 128482693 | Missense        | C        | T  | 0.214 | p.T777I      |
| 9623 | <i>GALNT16</i>      | 57452     | 14 | 69792727  | Missense        | G        | A  | 0.316 | p.R184H      |
| 9623 | <i>GRIA2</i>        | 2891      | 4  | 158256830 | Missense        | C        | T  | 0.333 | p.P378L      |
| 9623 | <i>GSDMC</i>        | 56169     | 8  | 130789697 | Missense        | C        | T  | 0.321 | p.R46H       |
| 9623 | <i>HDAC9</i>        | 9734      | 7  | 18688277  | Missense        | C        | A  | 0.211 | p.Q475K      |
| 9623 | <i>ISG15</i>        | 9636      | 1  | 949608    | Missense        | G        | A  | 0.065 | p.S83N       |
| 9623 | <i>ITGA8</i>        | 8516      | 10 | 15649687  | Missense        | C        | T  | 0.25  | p.V585I      |
| 9623 | <i>KALRN</i>        | 8997      | 3  | 124132413 | Missense        | C        | T  | 0.384 | p.R813C      |
| 9623 | <i>KALRN</i>        | 8997      | 3  | 123987945 | Missense        | C        | T  | 0.35  | p.P269L      |
| 9623 | <i>KIF2B</i>        | 84643     | 17 | 51901271  | Missense        | C        | T  | 0.356 | p.R293C      |
| 9623 | <i>KLHL38</i>       | 340359    | 8  | 124659205 | Missense        | A        | G  | 0.345 | p.I467T      |
| 9623 | <i>LHX5</i>         | 64211     | 12 | 113901201 | Missense        | C        | T  | 0.235 | p.A335T      |
| 9623 | <i>LINGO1</i>       | 84894     | 15 | 77907582  | Missense        | G        | A  | 0.531 | p.R217W      |
| 9623 | <i>LOC101929051</i> | 101929057 | 6  | 90383952  | Missense        | A        | G  | 0.286 | p.M4373T     |
| 9623 | <i>LYSMD4</i>       | 145748    | 15 | 100269680 | Missense        | G        | C  | 0.057 | p.A181G      |
| 9623 | <i>MACROD2</i>      | 140733    | 20 | 16025281  | Missense        | A        | T  | 0.359 | p.I198L      |
| 9623 | <i>MPO</i>          | 4353      | 17 | 56349062  | Missense        | C        | T  | 0.5   | p.A662T      |
| 9623 | <i>MYT1</i>         | 4661      | 20 | 62863653  | Missense        | T        | A  | 0.377 | p.S938T      |
| 9623 | <i>NBEAL2</i>       | 23218     | 3  | 47037954  | Missense        | A        | C  | 0.385 | p.D782A      |
| 9623 | <i>NFKB1A</i>       | 4792      | 14 | 35872949  | Missense        | G        | T  | 0.148 | p.R95S       |
| 9623 | <i>NID2</i>         | 22795     | 14 | 52507563  | Missense        | G        | A  | 0.464 | p.A611V      |
| 9623 | <i>NOTCH4</i>       | 4855      | 6  | 32170336  | Missense        | C        | T  | 0.333 | p.C1091Y     |
| 9623 | <i>NPAP1</i>        | 23742     | 15 | 24921090  | Missense        | G        | A  | 0.429 | p.A26T       |
| 9623 | <i>NWD2</i>         | 57495     | 4  | 37435537  | In_Frame_Del    | CAAG     | C  | 0.325 | p.201_202del |
| 9623 | <i>OR10G8</i>       | 219869    | 11 | 123900676 | Missense        | T        | G  | 0.277 | p.V116G      |
| 9623 | <i>OTOG</i>         | 340990    | 11 | 17618539  | Missense        | A        | C  | 0.625 | p.T1223P     |
| 9623 | <i>PDXDC1</i>       | 23042     | 16 | 15122780  | Missense        | G        | C  | 0.333 | p.G417A      |
| 9623 | <i>PLEKHS1</i>      | 79949     | 10 | 115534596 | Missense        | A        | G  | 0.438 | p.E264G      |
| 9623 | <i>POTEE</i>        | 445582    | 2  | 132021547 | Missense        | C        | T  | 0.16  | p.P840L      |
| 9623 | <i>POU4F2</i>       | 5458      | 4  | 147560497 | Nonsense        | C        | T  | 0.444 | p.R69X       |
| 9623 | <i>PTPRG</i>        | 5793      | 3  | 62204600  | Missense        | T        | A  | 0.321 | p.V744E      |
| 9623 | <i>PUM2</i>         | 23369     | 2  | 20511382  | Missense        | G        | T  | 0.081 | p.Q131K      |
| 9623 | <i>SLC1A1</i>       | 6505      | 9  | 4576117   | Missense        | C        | A  | 0.526 | p.S331Y      |
| 9623 | <i>SLIT2</i>        | 9353      | 4  | 20544188  | Nonsense        | C        | T  | 0.242 | p.R739X      |
| 9623 | <i>SPATA18</i>      | 132671    | 4  | 52943071  | Missense        | T        | A  | 0.261 | p.N295K      |
| 9623 | <i>STAG3</i>        | 10734     | 7  | 99796123  | Missense        | G        | A  | 0.364 | p.A424T      |
| 9623 | <i>SYNE1</i>        | 23345     | 6  | 152763329 | Missense        | C        | T  | 0.722 | p.A1297T     |
| 9623 | <i>TBX15</i>        | 6913      | 1  | 119427953 | Missense        | C        | T  | 0.357 | p.R298Q      |
| 9623 | <i>THBS1</i>        | 7057      | 15 | 39874652  | Missense        | G        | A  | 0.38  | p.R109Q      |
| 9623 | <i>TRAMIL1</i>      | 133022    | 4  | 118005706 | Missense        | A        | A  | 0.333 | p.R282W      |
| 9623 | <i>TRPM7</i>        | 54822     | 15 | 50853939  | Missense        | T        | C  | 0.393 | p.N1845S     |
| 9623 | <i>UNC5C</i>        | 8633      | 4  | 96137274  | Splice_Site     | C        | T  | 0.255 | c.1733+1G>A  |
| 9623 | <i>VCAN</i>         | 1462      | 5  | 82817997  | Missense        | C        | A  | 0.339 | p.T1291K     |
| 9623 | <i>WSCD2</i>        | 9671      | 12 | 108618630 | Missense        | C        | T  | 0.071 | p.T266I      |
| 9623 | <i>ZC3HAV1</i>      | 56829     | 7  | 138793981 | Frame_Shift_Del | AC       | A  | 0.229 | p.L32fs      |
| 9623 | <i>ZFP36L2</i>      | 678       | 2  | 43451739  | In_Frame_Del    | CCTG     | C  | 0.429 | p.401_401del |
| 9623 | <i>ZMAT4</i>        | 79698     | 8  | 40554867  | Missense        | C        | T  | 0.345 | p.M82I       |
| 9623 | <i>ZNF142</i>       | 7701      | 2  | 219509618 | Missense        | C        | A  | 0.087 | p.A541S      |
| 9623 | <i>ZNF845</i>       | 91664     | 19 | 53854344  | Missense        | A        | G  | 0.304 | p.Q139R      |
| 9622 | <i>ALMS1</i>        | 7840      | 2  | 73649987  | Missense        | A        | C  | 0.075 | p.I217L      |
| 9622 | <i>ALPP</i>         | 250       | 2  | 233245026 | Missense        | G        | A  | 0.2   | p.R263H      |
| 9622 | <i>ANPEP</i>        | 290       | 15 | 90349543  | Missense        | G        | A  | 0.072 | p.P91L       |
| 9622 | <i>BMP4</i>         | 652       | 14 | 54418679  | Missense        | G        | A  | 0.082 | p.R88W       |
| 9622 | <i>BPI</i>          | 671       | 20 | 36937420  | Missense        | A        | G  | 0.068 | p.I116V      |

|      |                   |           |    |           |                 |       |   |       |              |
|------|-------------------|-----------|----|-----------|-----------------|-------|---|-------|--------------|
| 9622 | <i>BZRAP1</i>     | 9256      | 17 | 56383744  | Missense        | T     | C | 0.077 | p.H1728R     |
| 9622 | <i>CDC14B</i>     | 8555      | 9  | 99296809  | Missense        | C     | A | 0.15  | p.D215Y      |
| 9622 | <i>COL1A2</i>     | 1278      | 7  | 94055756  | Missense        | G     | A | 0.065 | p.D1007N     |
| 9622 | <i>CSE1L</i>      | 1434      | 20 | 47695100  | Missense        | A     | C | 0.2   | p.N475H      |
| 9622 | <i>DYSF</i>       | 8291      | 2  | 71827924  | Missense        | G     | T | 0.097 | p.Q1297H     |
| 9622 | <i>FAM129C</i>    | 199786    | 19 | 17654181  | Missense        | C     | T | 0.094 | p.T493M      |
| 9622 | <i>FAM131B</i>    | 9715      | 7  | 143053723 | Missense        | C     | T | 0.047 | p.A307T      |
| 9622 | <i>FAM173A</i>    | 65990     | 16 | 771835    | Missense        | C     | A | 0.073 | p.A101D      |
| 9622 | <i>GNAQ</i>       | 2776      | 9  | 80537112  | Missense        | T     | A | 0.086 | p.T96S       |
| 9622 | <i>GNAQ</i>       | 2776      | 9  | 80537223  | Missense        | T     | G | 0.049 | p.M59L       |
| 9622 | <i>JAK1</i>       | 3716      | 1  | 65325872  | Missense        | G     | A | 0.079 | p.A417V      |
| 9622 | <i>KHK</i>        | 3795      | 2  | 27317406  | Missense        | A     | C | 0.067 | p.T91P       |
| 9622 | <i>LOXL3</i>      | 84695     | 2  | 74760769  | Missense        | T     | G | 0.128 | p.E742D      |
| 9622 | <i>LRP5L</i>      | 91355     | 22 | 25750656  | Missense        | G     | A | 0.217 | p.R188W      |
| 9622 | <i>MRO</i>        | 83876     | 18 | 48346048  | Missense        | G     | A | 0.064 | p.A15V       |
| 9622 | <i>MROH2A</i>     | 339766    | 2  | 234725502 | Missense        | T     | C | 0.068 | p.W981R      |
| 9622 | <i>NECAB2</i>     | 54550     | 16 | 84035446  | Missense        | C     | G | 0.086 | p.L353V      |
| 9622 | <i>NLRP3</i>      | 114548    | 1  | 247587317 | Missense        | G     | A | 0.048 | p.G191D      |
| 9622 | <i>OR10H1</i>     | 26539     | 19 | 15918177  | Missense        | G     | T | 0.135 | p.A224D      |
| 9622 | <i>PAQR6</i>      | 79957     | 1  | 156215945 | Missense        | C     | G | 0.14  | p.V47L       |
| 9622 | <i>SDK2</i>       | 54549     | 17 | 71348705  | Missense        | T     | C | 0.051 | p.I1889V     |
| 9622 | <i>SF3B2</i>      | 10992     | 11 | 65825521  | Splice_Site     | G     | T | 0.4   | c.778-4G>T   |
| 9622 | <i>SH3RF2</i>     | 153769    | 5  | 145442133 | Missense        | G     | A | 0.04  | p.V687I      |
| 9622 | <i>SLC5A9</i>     | 200010    | 1  | 48695030  | Missense        | G     | T | 0.2   | p.V160F      |
| 9622 | <i>STAT3</i>      | 6774      | 17 | 40475060  | In_Frame_Del    | CCTT  | C | 0.188 | p.616_617del |
| 9622 | <i>TMPPRSS2</i>   | 7113      | 21 | 42852497  | Missense        | C     | T | 0.061 | p.V160M      |
| 9622 | <i>TRPV4</i>      | 59341     | 12 | 110224646 | Splice_Site     | C     | T | 0.091 | c.2029-4G>A  |
| 9622 | <i>TUBGCP3</i>    | 10426     | 13 | 113176740 | Missense        | C     | A | 0.065 | p.D547Y      |
| 9622 | <i>UBR3</i>       | 130507    | 2  | 170734017 | Missense        | T     | A | 0.143 | p.N286K      |
| 9622 | <i>VNN1</i>       | 8876      | 6  | 133035098 | Missense        | G     | A | 0.071 | p.T26I       |
| 9622 | <i>ZNF479</i>     | 90827     | 7  | 57193730  | Missense        | T     | C | 0.333 | p.H86R       |
| 9616 | <i>ADAMTSL1</i>   | 92949     | 9  | 18680437  | Missense        | T     | C | 0.435 | p.Y422H      |
| 9616 | <i>ADH1A</i>      | 124       | 4  | 100200616 | Missense        | T     | C | 0.265 | p.N357S      |
| 9616 | <i>ALDOA</i>      | 226       | 16 | 30078612  | Nonsense        | A     | T | 0.235 | p.K13X       |
| 9616 | <i>ANGPTL1</i>    | 9068      | 1  | 178820338 | Missense        | T     | G | 0.22  | p.I468L      |
| 9616 | <i>ANKRD11</i>    | 29123     | 16 | 89351199  | Missense        | G     | C | 0.188 | p.S584C      |
| 9616 | <i>ASH1L</i>      | 55870     | 1  | 155307524 | Missense        | A     | C | 0.156 | p.L2941W     |
| 9616 | <i>BBS9</i>       | 27241     | 7  | 33644833  | Nonsense        | G     | T | 0.263 | p.E887X      |
| 9616 | <i>CAMK2B</i>     | 816       | 7  | 44272450  | Missense        | C     | T | 0.14  | p.V383I      |
| 9616 | <i>CDKN2A</i>     | 1029      | 9  | 21994286  | Nonsense        | G     | T | 0.329 | p.C15X       |
| 9616 | <i>CISH</i>       | 1154      | 3  | 50645426  | Missense        | C     | T | 0.188 | p.R147H      |
| 9616 | <i>CMYA5</i>      | 202333    | 5  | 79034412  | Missense        | C     | T | 0.191 | p.P3275L     |
| 9616 | <i>FAM166A</i>    | 401565    | 9  | 140139794 | Missense        | C     | T | 0.467 | p.A163T      |
| 9616 | <i>GPRC6A</i>     | 222545    | 6  | 117130704 | Missense        | G     | A | 0.111 | p.P91S       |
| 9616 | <i>GRIN2A</i>     | 2903      | 16 | 9858147   | Missense        | T     | G | 0.25  | p.N1085T     |
| 9616 | <i>HIP1R</i>      | 9026      | 12 | 123345987 | Missense        | G     | C | 0.7   | p.A1029P     |
| 9616 | <i>IRAK3</i>      | 11213     | 12 | 66641705  | Missense        | G     | T | 0.171 | p.M515I      |
| 9616 | <i>KALRN</i>      | 8997      | 3  | 124437917 | Missense        | G     | A | 0.278 | p.G2854D     |
| 9616 | <i>KIAA0226L</i>  | 80183     | 13 | 46946157  | Missense        | C     | T | 0.071 | p.G152R      |
| 9616 | <i>KMT2D</i>      | 8085      | 12 | 49435696  | Splice_Site     | T     | C | 0.238 | c.6183+4A>G  |
| 9616 | <i>KSR2</i>       | 283455    | 12 | 118298234 | Missense        | G     | T | 0.145 | p.S32R       |
| 9616 | <i>LITDI</i>      | 54596     | 1  | 62673208  | Missense        | C     | T | 0.073 | p.A303V      |
| 9616 | <i>LAMA5</i>      | 3911      | 20 | 60887592  | Splice_Site     | T     | C | 0.11  | c.9228-4A>G  |
| 9616 | <i>LRRC1</i>      | 55227     | 6  | 53787583  | Missense        | T     | G | 0.16  | p.S523A      |
| 9616 | <i>NBPFL20</i>    | 100288142 | 1  | 145075705 | Missense        | C     | T | 0.083 | p.R53H       |
| 9616 | <i>NOS3</i>       | 4846      | 7  | 150698654 | Missense        | C     | T | 0.071 | p.A484V      |
| 9616 | <i>PBX1</i>       | 5087      | 1  | 164768975 | Nonsense        | C     | T | 0.127 | p.R184X      |
| 9616 | <i>PCDHGA3</i>    | 56112     | 5  | 140751765 | Missense        | G     | A | 0.206 | p.A602T      |
| 9616 | <i>PCDHGB2</i>    | 56103     | 5  | 140746223 | Missense        | G     | C | 0.277 | p.A776P      |
| 9616 | <i>PCOLCE-AS1</i> | 100129845 | 7  | 100187845 | Frame_Shift_Del | GGCCA | G | 0.144 | p.G63fs      |
| 9616 | <i>PDLIM5</i>     | 10611     | 4  | 95532347  | Missense        | A     | C | 0.276 | p.T335P      |
| 9616 | <i>PDS5B</i>      | 23047     | 13 | 33225940  | Splice_Site     | G     | A | 0.143 | c.109-1G>A   |
| 9616 | <i>PRDM9</i>      | 56979     | 5  | 23518031  | Missense        | C     | G | 0.324 | p.H115D      |
| 9616 | <i>PTPN14</i>     | 5784      | 1  | 214560201 | Missense        | G     | A | 0.276 | p.T351M      |
| 9616 | <i>RNU6-81P</i>   | 100873780 | 2  | 132237927 | Missense        | C     | A | 0.156 | p.R221S      |
| 9616 | <i>RP1L1</i>      | 94137     | 8  | 10464785  | Missense        | C     | G | 0.2   | p.D2275H     |
| 9616 | <i>SH3RF3</i>     | 344558    | 2  | 110015203 | Missense        | G     | A | 0.213 | p.R368Q      |
| 9616 | <i>SLC13A1</i>    | 6561      | 7  | 122774474 | Missense        | G     | C | 0.105 | p.L308V      |
| 9616 | <i>SLC26A8</i>    | 116369    | 6  | 35945009  | Missense        | A     | G | 0.139 | p.L382P      |
| 9616 | <i>SLC4A5</i>     | 57835     | 2  | 74489356  | Missense        | C     | T | 0.312 | p.R240H      |
| 9616 | <i>SORBS2</i>     | 8470      | 4  | 186560075 | Missense        | C     | T | 0.129 | p.A446T      |
| 9616 | <i>SUN5</i>       | 140732    | 20 | 31583459  | Missense        | G     | A | 0.244 | p.A167V      |
| 9616 | <i>TBC1D10A</i>   | 83874     | 22 | 30688780  | Missense        | G     | A | 0.222 | p.R371C      |
| 9616 | <i>TLR3</i>       | 7098      | 4  | 187004302 | Nonsense        | C     | T | 0.259 | p.R488X      |
| 9616 | <i>TUBA3D</i>     | 113457    | 2  | 132240243 | Missense        | A     | T | 0.086 | p.D392V      |
| 9616 | <i>UBR2</i>       | 23304     | 6  | 42643830  | Nonsense        | C     | T | 0.25  | p.Q1430X     |
| 9616 | <i>UNC79</i>      | 57578     | 14 | 94120180  | Missense        | T     | A | 0.2   | p.L1921Q     |
| 9616 | <i>WDR64</i>      | 128025    | 1  | 241815799 | Missense        | A     | G | 0.18  | p.K5E        |
| 9616 | <i>XPO1</i>       | 7514      | 2  | 61724012  | Splice_Site     | A     | G | 0.103 | c.888+2T>C   |
| 9616 | <i>ZBTB7B</i>     | 51043     | 1  | 154987461 | Missense        | G     | T | 0.292 | p.A143S      |

|      |          |           |    |           |              |          |   |       |                |
|------|----------|-----------|----|-----------|--------------|----------|---|-------|----------------|
| 9616 | ZKSCAN2  | 342357    | 16 | 25266632  | Missense     | C        | T | 0.211 | p.E161K        |
| 9616 | ZNF354A  | 6940      | 5  | 178140480 | Missense     | C        | G | 0.147 | p.E133D        |
| 8751 | ADRBK2   | 157       | 22 | 26068297  | Missense     | G        | T | 0.143 | p.V180F        |
| 8751 | ALG6     | 29929     | 1  | 63881564  | Missense     | G        | T | 0.133 | p.S308I        |
| 8751 | AMDHD2   | 51005     | 16 | 2578503   | Missense     | C        | T | 0.122 | p.R305W        |
| 8751 | ANKRD30B | 374860    | 18 | 14748488  | Missense     | C        | T | 0.079 | p.R24W         |
| 8751 | ANKRD35  | 148741    | 1  | 145558841 | Missense     | C        | T | 0.104 | p.R154C        |
| 8751 | ASAP3    | 55616     | 1  | 23782472  | Missense     | C        | T | 0.118 | p.G84S         |
| 8751 | ASPSCR1  | 79058     | 17 | 79935602  | Missense     | C        | A | 0.125 | p.T27K         |
| 8751 | ASTN1    | 460       | 1  | 176926934 | Missense     | G        | T | 0.061 | p.D589E        |
| 8751 | ATP7B    | 540       | 13 | 52524488  | Missense     | T        | C | 0.066 | p.K721R        |
| 8751 | ATP7B    | 540       | 13 | 52548140  | Missense     | A        | C | 0.048 | p.S295A        |
| 8751 | ATXN1    | 6310      | 6  | 16327398  | Missense     | C        | A | 0.046 | p.V382L        |
| 8751 | B4GALT1  | 2683      | 9  | 33166805  | Missense     | G        | T | 0.062 | p.H121Q        |
| 8751 | BCYRN1   | 618       | X  | 70444065  | Missense     | G        | T | 0.053 | p.V170F        |
| 8751 | BRCA1    | 672       | 17 | 41243950  | Nonsense     | G        | A | 0.137 | p.Q1200X       |
| 8751 | C2orf54  | 79919     | 2  | 241831296 | Missense     | C        | G | 0.04  | p.A21P         |
| 8751 | C5orf42  | 65250     | 5  | 37238998  | Missense     | C        | A | 0.222 | p.C300F        |
| 8751 | CACNA1H  | 8912      | 16 | 1256117   | Missense     | G        | A | 0.167 | p.V873M        |
| 8751 | CDKL2    | 8999      | 4  | 76539579  | Nonsense     | G        | A | 0.091 | p.R75X         |
| 8751 | CELSR3   | 1951      | 3  | 48699499  | Missense     | T        | A | 0.184 | p.N190I        |
| 8751 | CEP164   | 22897     | 11 | 117252460 | Missense     | C        | A | 0.25  | p.P485T        |
| 8751 | CEP170B  | 283638    | 14 | 105355905 | In_Frame_Del | GGCTCCC  | T | 0.07  | p.1195_1199del |
| 8751 | CNTLN    | 54875     | 9  | 17340838  | Missense     | A        | C | 0.156 | p.D553A        |
| 8751 | COL4A5   | 1287      | X  | 107845184 | Missense     | C        | A | 0.15  | p.P704H        |
| 8751 | CSNK1A1  | 1452      | 5  | 148891427 | Missense     | T        | C | 0.286 | p.D230G        |
| 8751 | CUBN     | 8029      | 10 | 16957083  | Missense     | G        | T | 0.083 | p.D2433E       |
| 8751 | CYB5R2   | 51700     | 11 | 7689765   | Missense     | G        | A | 0.152 | p.T139M        |
| 8751 | DCTN5    | 84516     | 16 | 23669925  | Missense     | C        | A | 0.056 | p.P72Q         |
| 8751 | DDB1     | 1642      | 11 | 61084007  | Missense     | C        | G | 0.114 | p.E420Q        |
| 8751 | DENND6B  | 414918    | 22 | 50751508  | Missense     | C        | A | 0.103 | p.Q459H        |
| 8751 | DHX15    | 1665      | 4  | 24557977  | Missense     | C        | A | 0.064 | p.R253L        |
| 8751 | DNAH17   | 8632      | 17 | 76454743  | Missense     | C        | G | 0.105 | p.S3294T       |
| 8751 | DNAH5    | 1767      | 5  | 13931340  | Missense     | C        | T | 0.097 | p.G24E         |
| 8751 | DOCK3    | 1795      | 3  | 51417592  | Missense     | C        | A | 0.183 | p.P1846H       |
| 8751 | DSC3     | 1825      | 18 | 28598703  | Missense     | T        | C | 0.115 | p.I336V        |
| 8751 | EIF4A1   | 1973      | 17 | 7480933   | Missense     | T        | C | 0.059 | p.I272T        |
| 8751 | ERCC6L2  | 375748    | 9  | 98703807  | Missense     | C        | A | 0.167 | p.A619D        |
| 8751 | ERICH6   | 131831    | 3  | 150421324 | Missense     | G        | T | 0.061 | p.T121K        |
| 8751 | ERMP1    | 79956     | 9  | 5830763   | Missense     | C        | A | 0.105 | p.A202S        |
| 8751 | FAM154A  | 158297    | 9  | 18928895  | Missense     | G        | T | 0.165 | p.P194T        |
| 8751 | FAM47B   | 170062    | X  | 34961516  | Missense     | C        | T | 0.128 | p.R190W        |
| 8751 | FBXO16   | 157574    | 8  | 28321131  | Missense     | G        | T | 0.061 | p.Q114K        |
| 8751 | FLII     | 2314      | 17 | 18154618  | Missense     | G        | T | 0.057 | p.H519Q        |
| 8751 | FZD10    | 11211     | 12 | 130647715 | Missense     | G        | T | 0.064 | p.E76D         |
| 8751 | GCFC2    | 6936      | 2  | 75893054  | Splice_Site  | C        | A | 0.125 | c.2228+1G>T    |
| 8751 | GPR39    | 2863      | 2  | 133402778 | Missense     | G        | A | 0.093 | p.A321T        |
| 8751 | GRK6     | 2870      | 5  | 176863227 | Missense     | T        | A | 0.043 | p.V404D        |
| 8751 | GUCY1B3  | 2983      | 4  | 156725760 | Missense     | C        | G | 0.13  | p.H499D        |
| 8751 | GYS2     | 2998      | 12 | 21713332  | Missense     | C        | G | 0.108 | p.R386P        |
| 8751 | HIST1H4F | 8361      | 6  | 26240948  | Missense     | T        | G | 0.178 | p.Y99D         |
| 8751 | HLA-DQB2 | 3120      | 6  | 32725563  | Missense     | G        | T | 0.143 | p.H248Q        |
| 8751 | HOOK1    | 51361     | 1  | 60325897  | Missense     | C        | A | 0.125 | p.L477I        |
| 8751 | IGDCC4   | 57722     | 15 | 65686839  | Missense     | C        | A | 0.058 | p.D542Y        |
| 8751 | INTS7    | 25896     | 1  | 212118137 | Missense     | G        | T | 0.048 | p.Q864K        |
| 8751 | KIAA0391 | 9692      | 14 | 35739664  | Missense     | G        | T | 0.064 | p.R494S        |
| 8751 | KIAA1109 | 84162     | 4  | 123095771 | Missense     | G        | T | 0.125 | p.R86L         |
| 8751 | KIF13B   | 23303     | 8  | 28929734  | Missense     | C        | A | 0.081 | p.V1541F       |
| 8751 | KIF7     | 374654    | 15 | 90191868  | Missense     | G        | T | 0.07  | p.T354K        |
| 8751 | LAMA2    | 3908      | 6  | 129511346 | Splice_Site  | G        | T | 0.067 | c.1468-4G>T    |
| 8751 | LENG1    | 79165     | 19 | 54659646  | Missense     | C        | A | 0.086 | p.R203L        |
| 8751 | LTN1     | 26046     | 21 | 30342977  | Missense     | C        | A | 0.071 | p.V404F        |
| 8751 | MAGIX    | 79917     | X  | 49021637  | Missense     | G        | T | 0.1   | p.R206L        |
| 8751 | MAP1A    | 4130      | 15 | 43816082  | Missense     | C        | T | 0.13  | p.T804M        |
| 8751 | MAST4    | 375449    | 5  | 66055633  | Missense     | C        | A | 0.064 | p.Q154K        |
| 8751 | MCTP1    | 79772     | 5  | 94206594  | Missense     | C        | G | 0.137 | p.D742H        |
| 8751 | MIR548AZ | 102466162 | 14 | 64588745  | Missense     | C        | A | 0.333 | p.P4392T       |
| 8751 | MROH2A   | 339766    | 2  | 234688067 | Missense     | C        | A | 0.154 | p.D21E         |
| 8751 | MYO1G    | 64005     | 7  | 45006306  | Missense     | G        | C | 0.224 | p.F638L        |
| 8751 | NCOA4    | 8031      | 10 | 51586609  | Splice_Site  | G        | T | 0.1   | c.1888-1G>T    |
| 8751 | NUS1     | 116150    | 6  | 118014285 | Missense     | A        | G | 0.182 | p.K166E        |
| 8751 | OR8U8    | 504189    | 11 | 56143158  | Missense     | A        | G | 0.088 | p.H20R         |
| 8751 | P4HA2    | 8974      | 5  | 131554262 | Nonsense     | G        | A | 0.086 | p.Q20X         |
| 8751 | PASD1    | 139135    | X  | 150842486 | Missense     | G        | A | 0.041 | p.S668N        |
| 8751 | PATE1    | 160065    | 11 | 125617688 | Missense     | A        | T | 0.068 | p.E73V         |
| 8751 | PCDH10   | 57575     | 4  | 134072874 | Missense     | G        | A | 0.156 | p.A527T        |
| 8751 | PIBF1    | 10464     | 13 | 73396015  | Missense     | C        | T | 0.105 | p.S234F        |
| 8751 | PIBF1    | 10464     | 13 | 73396017  | Missense     | G        | A | 0.105 | p.E235K        |
| 8751 | PITRM1   | 10531     | 10 | 3193557   | Splice_Site  | AAAAGAAA | T | 0.143 | .              |
| 8751 | PKHD1L1  | 93035     | 8  | 110450623 | Missense     | G        | T | 0.154 | p.S1233I       |

|      |                  |        |    |           |                 |       |         |       |                     |
|------|------------------|--------|----|-----------|-----------------|-------|---------|-------|---------------------|
| 8751 | <i>PNKD</i>      | 25953  | 2  | 219143777 | Missense        | C     | A       | 0.067 | p.V136F             |
| 8751 | <i>PRPF6</i>     | 24148  | 20 | 62616356  | Missense        | G     | T       | 0.094 | p.D113Y             |
| 8751 | <i>PRSS37</i>    | 136242 | 7  | 141536287 | Nonsense        | C     | A       | 0.077 | p.E205X             |
| 8751 | <i>PTPN13</i>    | 5783   | 4  | 87705670  | Missense        | C     | A       | 0.133 | p.T2031N            |
| 8751 | <i>PTPN4</i>     | 5775   | 2  | 120723130 | Missense        | G     | T       | 0.111 | p.V823F             |
| 8751 | <i>PYGL</i>      | 5836   | 14 | 51382134  | Missense        | G     | T       | 0.045 | p.N441K             |
| 8751 | <i>RAI14</i>     | 26064  | 5  | 34823332  | Missense        | G     | A       | 0.073 | p.R465Q             |
| 8751 | <i>RBCK1</i>     | 10616  | 20 | 389407    | Nonsense        | C     | T       | 0.081 | p.R9X               |
| 8751 | <i>RNF150</i>    | 57484  | 4  | 142053846 | Missense        | C     | A       | 0.082 | p.W39C              |
| 8751 | <i>RPE</i>       | 6120   | 2  | 210880950 | Missense        | A     | G       | 0.1   | p.E54G              |
| 8751 | <i>RRP9</i>      | 9136   | 3  | 51969661  | Missense        | G     | T       | 0.053 | p.H261Q             |
| 8751 | <i>RYR2</i>      | 6262   | 1  | 237995876 | Missense        | C     | A       | 0.222 | p.Q4945K            |
| 8751 | <i>SEMA5B</i>    | 54437  | 3  | 122629803 | Missense        | G     | T       | 0.111 | p.H1115N            |
| 8751 | <i>SERGEF</i>    | 26297  | 11 | 18026044  | Missense        | C     | T       | 0.111 | p.G131S             |
| 8751 | <i>SGK494</i>    | 124923 | 17 | 26940645  | Missense        | C     | A       | 0.088 | p.G46V              |
| 8751 | <i>SIGLEC9</i>   | 27180  | 19 | 51630482  | Missense        | C     | A       | 0.071 | p.A315E             |
| 8751 | <i>SMC4</i>      | 10051  | 3  | 160143863 | Missense        | G     | T       | 0.133 | p.R802L             |
| 8751 | <i>SORCS3</i>    | 22986  | 10 | 106976871 | Missense        | C     | A       | 0.143 | p.H909N             |
| 8751 | <i>SPACA1</i>    | 81833  | 6  | 88769192  | Missense        | G     | T       | 0.125 | p.D166Y             |
| 8751 | <i>SPNS3</i>     | 201305 | 17 | 4349351   | Missense        | G     | T       | 0.2   | p.W137C             |
| 8751 | <i>STAB2</i>     | 55576  | 12 | 104149092 | Missense        | C     | A       | 0.111 | p.L2243M            |
| 8751 | <i>STPG2</i>     | 285555 | 4  | 99049712  | Missense        | C     | A       | 0.154 | p.S85I              |
| 8751 | <i>SYNE1</i>     | 23345  | 6  | 152453297 | Missense        | C     | A       | 0.062 | p.S8685I            |
| 8751 | <i>TACO1</i>     | 51204  | 17 | 61684795  | Nonsense        | G     | T       | 0.111 | p.E222X             |
| 8751 | <i>TARS</i>      | 6897   | 5  | 33462241  | Missense        | C     | G       | 0.143 | p.H623D             |
| 8751 | <i>TC2N</i>      | 123036 | 14 | 92278674  | Missense        | G     | T       | 0.111 | p.H95N              |
| 8751 | <i>TNK1</i>      | 8711   | 17 | 7287440   | Missense        | A     | G       | 0.19  | p.D245G             |
| 8751 | <i>TTC13</i>     | 79573  | 1  | 231114501 | Missense        | C     | A       | 0.133 | p.V26F              |
| 8751 | <i>TTC24</i>     | 164118 | 1  | 156553200 | Missense        | C     | A       | 0.043 | p.D370E             |
| 8751 | <i>UBD</i>       | 10537  | 6  | 29527451  | Splice_Site     | C     | A       | 0.133 | c.27+1G>T           |
| 8751 | <i>UPF2</i>      | 26019  | 10 | 12071002  | Missense        | T     | C       | 0.087 | p.N296S             |
| 8751 | <i>USH2A</i>     | 7399   | 1  | 216262424 | Missense        | T     | C       | 0.136 | p.K1606E            |
| 8751 | <i>UTRN</i>      | 7402   | 6  | 145069554 | Missense        | C     | A       | 0.043 | p.D2704E            |
| 8751 | <i>WIPF3</i>     | 644150 | 7  | 29915545  | Missense        | C     | A       | 0.081 | p.Q64K              |
| 8751 | <i>ZBBX</i>      | 79740  | 3  | 166958708 | Splice_Site     | C     | T       | 0.087 | c.2277-1G>A         |
| 8751 | <i>ZC3H3</i>     | 23144  | 8  | 144547955 | Missense        | C     | A       | 0.06  | p.V747L             |
| 8751 | <i>ZDHH8</i>     | 29801  | 22 | 20128826  | Missense        | C     | A       | 0.064 | p.S327R             |
| 8221 | <i>ALPPL2</i>    | 251    | 2  | 233273244 | Missense        | C     | A       | 0.153 | p.L273M             |
| 8221 | <i>AP3S1</i>     | 1176   | 5  | 115249078 | Missense        | C     | T       | 1     | p.P158L             |
| 8221 | <i>ARHGAP22</i>  | 58504  | 10 | 49667878  | Missense        | G     | A       | 0.421 | p.R170C             |
| 8221 | <i>BASPI</i>     | 10409  | 5  | 17275887  | Missense        | G     | A       | 0.282 | p.A188T             |
| 8221 | <i>BBS9</i>      | 27241  | 7  | 33407475  | Splice_Site     | G     | A       | 0.379 | c.1789+1G>A         |
| 8221 | <i>BRD8</i>      | 10902  | 5  | 137503739 | Missense        | G     | A       | 0.417 | p.S297F             |
| 8221 | <i>CIQB</i>      | 713    | 1  | 22986040  | Missense        | T     | C       | 0.283 | p.C31R              |
| 8221 | <i>CA3</i>       | 761    | 8  | 86358504  | Missense        | C     | T       | 0.232 | p.P214L             |
| 8221 | <i>CAMSAP3</i>   | 57662  | 19 | 7677450   | Missense        | G     | C       | 0.366 | p.V718L             |
| 8221 | <i>CEP164</i>    | 22897  | 11 | 117253636 | Missense        | A     | C       | 0.371 | p.T568P             |
| 8221 | <i>CNTROB</i>    | 116840 | 17 | 7838452   | Missense        | A     | C       | 0.342 | p.T195P             |
| 8221 | <i>CTNNA2</i>    | 1496   | 2  | 80530511  | Missense        | G     | A       | 0.276 | p.S145L             |
| 8221 | <i>CYP2F1</i>    | 1572   | 19 | 41633809  | Missense        | G     | A       | 0.308 | p.R433H             |
| 8221 | <i>DDX4</i>      | 54514  | 5  | 55088574  | Missense        | C     | T       | 0.068 | p.P470S             |
| 8221 | <i>DMXL2</i>     | 23312  | 15 | 51772183  | Missense        | T     | C       | 0.583 | p.M2240V            |
| 8221 | <i>DNAAF1</i>    | 123872 | 16 | 84205892  | Missense        | G     | A       | 0.392 | p.E519K             |
| 8221 | <i>DNAH5</i>     | 1767   | 5  | 13727663  | Missense        | G     | A       | 0.582 | p.R3996C            |
| 8221 | <i>ENTHD2</i>    | 146705 | 17 | 79202760  | Missense        | C     | G       | 0.346 | p.E516Q             |
| 8221 | <i>FAM205A</i>   | 259308 | 9  | 34725438  | Missense        | A     | G       | 0.5   | p.L600S             |
| 8221 | <i>FBXO16</i>    | 157574 | 8  | 28314360  | Missense        | G     | T       | 0.333 | p.P144T             |
| 8221 | <i>FKRP</i>      | 79147  | 19 | 47259734  | Missense        | G     | C       | 0.231 | p.E343Q             |
| 8221 | <i>FLG</i>       | 2312   | 1  | 152284798 | Missense        | G     | T       | 0.125 | p.S855Y             |
| 8221 | <i>GALNS</i>     | 2588   | 16 | 88889073  | Missense        | G     | A       | 0.359 | p.H430Y             |
| 8221 | <i>GPAT2</i>     | 150763 | 2  | 96688929  | Missense        | G     | A       | 0.079 | p.R692C             |
| 8221 | <i>GPR98</i>     | 84059  | 5  | 90049445  | Missense        | G     | T       | 0.361 | p.D3726Y            |
| 8221 | <i>HECTD4</i>    | 283450 | 12 | 112688167 | Missense        | A     | C       | 0.435 | p.V1110G            |
| 8221 | <i>HRNR</i>      | 388697 | 1  | 152190938 | Missense        | C     | T       | 0.273 | p.R1056H            |
| 8221 | <i>HRNR</i>      | 388697 | 1  | 152187510 | Missense        | C     | T       | 0.07  | p.G2199S            |
| 8221 | <i>IL7R</i>      | 3575   | 5  | 35871314  | Missense        | C     | T       | 0.333 | p.T179M             |
| 8221 | <i>LOC401052</i> | 401052 | 3  | 10049098  | Missense        | T     | G       | 0.308 | p.H96P              |
| 8221 | <i>MBD1</i>      | 4152   | 18 | 47806297  | Frame_Shift_Del | GCGAA | G       | 0.208 | p.F21fs             |
| 8221 | <i>MPLKIP</i>    | 136647 | 7  | 40172713  | Nonsense        | T     | GGCTTAI | 0.085 | g.Q162_Q163delinsLX |
| 8221 | <i>MUC17</i>     | 140453 | 7  | 100683771 | Missense        | G     | A       | 0.065 | p.S3025N            |
| 8221 | <i>MUC6</i>      | 4588   | 11 | 1017325   | Missense        | A     | C       | 0.067 | p.Y1826D            |
| 8221 | <i>MYADM</i>     | 91663  | 19 | 54377469  | Missense        | C     | G       | 0.356 | p.T229S             |
| 8221 | <i>NBPF8</i>     | 728841 | 1  | 147597264 | Missense        | G     | C       | 1     | p.L120V             |
| 8221 | <i>OR4A15</i>    | 81328  | 11 | 55135435  | Missense        | C     | T       | 0.053 | p.P26S              |
| 8221 | <i>OR4N2</i>     | 390429 | 14 | 20296064  | Missense        | T     | C       | 0.243 | p.F153L             |
| 8221 | <i>OR52E6</i>    | 390078 | 11 | 5863060   | Missense        | T     | C       | 0.041 | p.E23G              |
| 8221 | <i>OR7D4</i>     | 125958 | 19 | 9324835   | Missense        | C     | T       | 0.068 | p.G227R             |
| 8221 | <i>POTEF</i>     | 728378 | 2  | 130832256 | Missense        | A     | G       | 0.067 | p.V930A             |
| 8221 | <i>PRKCG</i>     | 5582   | 19 | 54403979  | Frame_Shift_Ins | G     | GA      | 0.287 | p.G517fs            |
| 8221 | <i>QRICH2</i>    | 84074  | 17 | 74287594  | Missense        | G     | A       | 0.047 | p.H906Y             |

|      |                  |           |    |           |              |          |   |       |              |
|------|------------------|-----------|----|-----------|--------------|----------|---|-------|--------------|
| 8221 | <i>RHOF</i>      | 54509     | 12 | 122217559 | Missense     | C        | T | 0.044 | p.A161T      |
| 8221 | <i>SCN5A</i>     | 6331      | 3  | 38674610  | Missense     | C        | A | 0.207 | p.K63N       |
| 8221 | <i>SEMA5A</i>    | 9037      | 5  | 9224845   | Missense     | C        | A | 0.278 | p.R196L      |
| 8221 | <i>SGTB</i>      | 54557     | 5  | 64981284  | Missense     | G        | T | 0.279 | p.S130R      |
| 8221 | <i>SIGLEC8</i>   | 27181     | 19 | 51957531  | Missense     | G        | A | 0.355 | p.A396V      |
| 8221 | <i>SLC30A4</i>   | 7782      | 15 | 45814162  | Missense     | C        | T | 0.352 | p.G131S      |
| 8221 | <i>TMEM47</i>    | 83604     | X  | 34675139  | Missense     | G        | A | 0.073 | p.S3L        |
| 8221 | <i>TRIM56</i>    | 81844     | 7  | 100731821 | In_Frame_Del | GGAGATGC | C | 0.208 | p.410_418del |
| 8221 | <i>TYW1</i>      | 55253     | 7  | 66563540  | Missense     | T        | C | 0.064 | p.V466A      |
| 8221 | <i>UGT2A1</i>    | 10941     | 4  | 70465059  | Nonsense     | G        | A | 0.305 | p.R301X      |
| 8221 | <i>ZDHHC14</i>   | 79683     | 6  | 158093930 | Missense     | A        | G | 0.489 | p.M400V      |
| 8219 | <i>4-Mar</i>     | 57574     | 2  | 217234619 | Missense     | G        | A | 0.175 | p.P122L      |
| 8219 | <i>ABCA4</i>     | 24        | 1  | 94528713  | Missense     | C        | T | 0.167 | p.R572Q      |
| 8219 | <i>ABHD17A</i>   | 81926     | 19 | 1879987   | Missense     | A        | C | 0.058 | p.S205A      |
| 8219 | <i>ADORA3</i>    | 140       | 1  | 112045880 | Missense     | C        | T | 0.098 | p.V33I       |
| 8219 | <i>AJAP1</i>     | 55966     | 1  | 4772717   | Missense     | G        | A | 0.032 | p.G263R      |
| 8219 | <i>ALPLP2</i>    | 251       | 2  | 233273207 | Splice_Site  | G        | A | 0.028 | c.784-4G>A   |
| 8219 | <i>AMOTL1</i>    | 154810    | 11 | 94592756  | Missense     | C        | T | 0.173 | p.R671W      |
| 8219 | <i>ANGPTL4</i>   | 51129     | 19 | 8429272   | Missense     | G        | A | 0.134 | p.A23T       |
| 8219 | <i>BRPF3</i>     | 27154     | 6  | 36178239  | Missense     | G        | A | 0.03  | p.E705K      |
| 8219 | <i>C3orf52</i>   | 79669     | 3  | 111821702 | Missense     | G        | A | 0.143 | p.D96N       |
| 8219 | <i>C9orf9</i>    | 11092     | 9  | 135762805 | Missense     | T        | G | 0.267 | p.V65G       |
| 8219 | <i>CASQ2</i>     | 845       | 1  | 116310967 | Missense     | T        | C | 0.044 | p.T66A       |
| 8219 | <i>CCDC158</i>   | 339965    | 4  | 77305725  | Missense     | C        | A | 0.152 | p.A128S      |
| 8219 | <i>CCDC40</i>    | 55036     | 17 | 78032413  | Missense     | C        | T | 0.142 | p.T427M      |
| 8219 | <i>CDH16</i>     | 1014      | 16 | 66949992  | Missense     | G        | A | 0.126 | p.R134W      |
| 8219 | <i>CDH3</i>      | 1001      | 16 | 68725767  | Missense     | G        | T | 0.103 | p.C647F      |
| 8219 | <i>CDHR5</i>     | 53841     | 11 | 624658    | Missense     | C        | T | 0.117 | p.V54I       |
| 8219 | <i>CDKN2A</i>    | 1029      | 9  | 21971120  | Nonsense     | G        | A | 0.137 | p.R80X       |
| 8219 | <i>CELA2B</i>    | 51032     | 1  | 15808872  | Missense     | G        | A | 0.048 | p.D114N      |
| 8219 | <i>CELSR3</i>    | 1951      | 3  | 48697921  | Missense     | C        | T | 0.102 | p.R716H      |
| 8219 | <i>CEP164</i>    | 22897     | 11 | 117253636 | Missense     | A        | C | 0.417 | p.T568P      |
| 8219 | <i>CHD7</i>      | 55636     | 8  | 61765616  | Missense     | G        | A | 0.071 | p.R2111Q     |
| 8219 | <i>CLPTMIL</i>   | 81037     | 5  | 1325888   | Missense     | C        | A | 0.171 | p.R375I      |
| 8219 | <i>COL21A1</i>   | 81578     | 6  | 55925584  | Missense     | A        | G | 0.119 | p.F788L      |
| 8219 | <i>CUX2</i>      | 23316     | 12 | 111744758 | Missense     | C        | T | 0.057 | p.R298W      |
| 8219 | <i>CYP2A13</i>   | 1553      | 19 | 41595958  | Missense     | C        | T | 0.148 | p.A117V      |
| 8219 | <i>CYP4A11</i>   | 1579      | 1  | 47395874  | Missense     | A        | C | 0.093 | p.I491M      |
| 8219 | <i>DAB2IP</i>    | 153090    | 9  | 124543775 | Missense     | A        | T | 0.094 | p.D1088V     |
| 8219 | <i>DNAH1</i>     | 25981     | 3  | 52414111  | Missense     | C        | A | 0.147 | p.S2523Y     |
| 8219 | <i>DNMT1</i>     | 1786      | 19 | 10291181  | Missense     | T        | C | 0.071 | p.H97R       |
| 8219 | <i>EME2</i>      | 197342    | 16 | 1826148   | Missense     | G        | A | 0.142 | p.R350H      |
| 8219 | <i>EPHA7</i>     | 2045      | 6  | 93956703  | Missense     | C        | A | 0.214 | p.V845F      |
| 8219 | <i>ERBB2</i>     | 2064      | 17 | 37876044  | Missense     | G        | T | 0.056 | p.V620L      |
| 8219 | <i>EVX1</i>      | 2128      | 7  | 27285725  | Missense     | G        | T | 0.062 | p.G302V      |
| 8219 | <i>FAM135A</i>   | 57579     | 6  | 71187020  | Missense     | A        | C | 0.25  | p.H176P      |
| 8219 | <i>FAM135A</i>   | 57579     | 6  | 71248050  | Nonsense     | C        | T | 0.091 | p.R1196X     |
| 8219 | <i>FBXO41</i>    | 150726    | 2  | 73496751  | Missense     | G        | A | 0.033 | p.S3L        |
| 8219 | <i>FHDC1</i>     | 85462     | 4  | 153896380 | Missense     | G        | A | 0.026 | p.R646Q      |
| 8219 | <i>FXYD6</i>     | 53826     | 11 | 117711896 | Missense     | C        | T | 0.078 | p.R59H       |
| 8219 | <i>GCC2</i>      | 9648      | 2  | 109066089 | Missense     | G        | C | 0.188 | p.D3H        |
| 8219 | <i>GPAT2</i>     | 150763    | 2  | 96688961  | Missense     | G        | A | 0.057 | p.S681L      |
| 8219 | <i>GPAT2</i>     | 150763    | 2  | 96688929  | Missense     | G        | A | 0.051 | p.R692C      |
| 8219 | <i>GRM3</i>      | 2913      | 7  | 86415913  | Missense     | G        | A | 0.118 | p.A269T      |
| 8219 | <i>GSTM1</i>     | 2944      | 1  | 110233138 | Missense     | G        | C | 0.088 | p.K173N      |
| 8219 | <i>GYS2</i>      | 2998      | 12 | 21733432  | Missense     | C        | G | 0.161 | p.Q49H       |
| 8219 | <i>H6PD</i>      | 9563      | 1  | 9322153   | Missense     | C        | T | 0.027 | p.R261C      |
| 8219 | <i>HCAR3</i>     | 8843      | 12 | 123201205 | Missense     | G        | A | 0.056 | p.A27V       |
| 8219 | <i>HDAC4</i>     | 9759      | 2  | 240111555 | Missense     | C        | T | 0.029 | p.E105K      |
| 8219 | <i>KLC1</i>      | 3831      | 14 | 104129155 | Missense     | G        | A | 0.035 | p.E230K      |
| 8219 | <i>KMT2D</i>     | 8085      | 12 | 49433256  | Nonsense     | G        | A | 0.11  | p.Q2731X     |
| 8219 | <i>KMT2D</i>     | 8085      | 12 | 49420655  | Missense     | A        | G | 0.105 | p.C5032R     |
| 8219 | <i>KRTAP10-6</i> | 386674    | 21 | 46011891  | Missense     | C        | T | 0.07  | p.V159I      |
| 8219 | <i>KRTAP4-7</i>  | 100132476 | 17 | 39240580  | Missense     | G        | A | 0.145 | p.R41H       |
| 8219 | <i>LOC401052</i> | 401052    | 3  | 10049098  | Missense     | T        | G | 0.5   | p.H96P       |
| 8219 | <i>LPIN3</i>     | 64900     | 20 | 39978786  | Missense     | C        | G | 0.138 | p.S284C      |
| 8219 | <i>MGA</i>       | 23269     | 15 | 42021428  | Nonsense     | C        | T | 0.172 | p.R1242X     |
| 8219 | <i>MPV17L</i>    | 255027    | 16 | 15501888  | Missense     | T        | C | 0.286 | p.W147R      |
| 8219 | <i>MUC17</i>     | 140453    | 7  | 100681460 | Missense     | A        | G | 0.051 | p.T2255A     |
| 8219 | <i>MUC17</i>     | 140453    | 7  | 100684419 | Missense     | T        | C | 0.038 | p.I3241T     |
| 8219 | <i>MUC4</i>      | 4585      | 3  | 195513338 | Missense     | C        | T | 0.25  | p.A1705T     |
| 8219 | <i>MUC5B</i>     | 727897    | 11 | 1268036   | Missense     | C        | T | 0.3   | p.P3309L     |
| 8219 | <i>MYH7B</i>     | 57644     | 20 | 33588866  | Nonsense     | G        | T | 0.093 | p.E1836X     |
| 8219 | <i>MYH9</i>      | 4627      | 22 | 36702602  | Missense     | A        | T | 0.132 | p.L632Q      |
| 8219 | <i>NBPF12</i>    | 149013    | 1  | 146400170 | Missense     | G        | A | 0.286 | p.G216S      |
| 8219 | <i>NEDD4</i>     | 4734      | 15 | 56141063  | Missense     | G        | T | 0.1   | p.P457T      |
| 8219 | <i>NOTCH2</i>    | 4853      | 1  | 120480552 | Missense     | A        | G | 0.182 | p.C1089R     |
| 8219 | <i>NUDT10</i>    | 170685    | X  | 51076083  | Missense     | C        | G | 0.2   | p.P89R       |
| 8219 | <i>OBSCN</i>     | 84033     | 1  | 228487637 | Missense     | C        | A | 0.143 | p.A4510D     |
| 8219 | <i>OR4M2</i>     | 390538    | 15 | 22369506  | Missense     | A        | G | 0.051 | p.K311E      |

|      |                  |           |    |           |                 |     |    |       |             |
|------|------------------|-----------|----|-----------|-----------------|-----|----|-------|-------------|
| 8219 | <i>OR4N2</i>     | 390429    | 14 | 20295878  | Missense        | A   | G  | 0.057 | p.I91V      |
| 8219 | <i>OR4N4</i>     | 283694    | 15 | 22383017  | Missense        | G   | C  | 0.041 | p.R182P     |
| 8219 | <i>OR4N5</i>     | 390437    | 14 | 20612098  | Missense        | A   | C  | 0.068 | p.L68F      |
| 8219 | <i>OR4Q3</i>     | 441669    | 14 | 20216004  | Missense        | C   | A  | 0.051 | p.Q140K     |
| 8219 | <i>OR5H14</i>    | 403273    | 3  | 97868278  | Missense        | T   | C  | 0.286 | p.F17L      |
| 8219 | <i>PABPC1</i>    | 26986     | 8  | 101724623 | Frame_Shift_Ins | C   | CA | 0.303 | p.E313fs    |
| 8219 | <i>PABPC1</i>    | 26986     | 8  | 101724625 | Frame_Shift_Del | CTT | C  | 0.286 | p.K312fs    |
| 8219 | <i>PABPC1</i>    | 26986     | 8  | 101724606 | Missense        | G   | A  | 0.214 | p.T319I     |
| 8219 | <i>PABPC1</i>    | 26986     | 8  | 101717832 | Missense        | G   | C  | 0.1   | p.Q558E     |
| 8219 | <i>PARD3B</i>    | 117583    | 2  | 205969205 | Missense        | T   | C  | 0.205 | p.L187P     |
| 8219 | <i>PCMT1</i>     | 5110      | 6  | 150114745 | Missense        | G   | A  | 0.075 | p.V178I     |
| 8219 | <i>PCSK6</i>     | 5046      | 15 | 101970191 | Splice_Site     | C   | G  | 0.082 | c.732+1G>C  |
| 8219 | <i>PEG3</i>      | 5178      | 19 | 57325494  | Missense        | G   | A  | 0.148 | p.P1439L    |
| 8219 | <i>PER3</i>      | 8863      | 1  | 7845542   | Missense        | T   | G  | 0.089 | p.M57R      |
| 8219 | <i>PKHD1L1</i>   | 93035     | 8  | 110476775 | Nonsense        | C   | T  | 0.178 | p.R2572X    |
| 8219 | <i>PPP1R16A</i>  | 84988     | 8  | 145726525 | Missense        | C   | T  | 0.117 | p.R351W     |
| 8219 | <i>PPP1R37</i>   | 284352    | 19 | 45649680  | Missense        | G   | A  | 0.044 | p.E676K     |
| 8219 | <i>RBM20</i>     | 282996    | 10 | 112572151 | Missense        | C   | T  | 0.093 | p.R666W     |
| 8219 | <i>REG3G</i>     | 130120    | 2  | 79254164  | Missense        | C   | A  | 0.133 | p.A67D      |
| 8219 | <i>RIMBP2</i>    | 23504     | 12 | 130935849 | Missense        | C   | T  | 0.093 | p.G115D     |
| 8219 | <i>RNF126</i>    | 55658     | 19 | 651633    | Missense        | C   | T  | 0.098 | p.E141K     |
| 8219 | <i>SEC14L5</i>   | 9717      | 16 | 5057362   | Missense        | C   | T  | 0.061 | p.P483S     |
| 8219 | <i>SEC23A</i>    | 10484     | 14 | 39543728  | Missense        | C   | T  | 0.158 | p.E332K     |
| 8219 | <i>SF3B3</i>     | 23450     | 16 | 70563087  | Missense        | C   | G  | 0.19  | p.R128G     |
| 8219 | <i>SGPP1</i>     | 81537     | 14 | 64153157  | Missense        | C   | T  | 0.109 | p.C331Y     |
| 8219 | <i>SH3PXD2A</i>  | 9644      | 10 | 105363548 | Splice_Site     | T   | G  | 0.118 | c.1345-2A>C |
| 8219 | <i>SIGLEC12</i>  | 89858     | 19 | 52002827  | Missense        | C   | T  | 0.092 | p.D318N     |
| 8219 | <i>SLC30A10</i>  | 55532     | 1  | 220101599 | Missense        | G   | A  | 0.116 | p.R62W      |
| 8219 | <i>SMC4</i>      | 10051     | 3  | 160150844 | Missense        | G   | T  | 0.21  | p.K1162N    |
| 8219 | <i>SND1</i>      | 27044     | 7  | 127669034 | Missense        | G   | A  | 0.175 | p.H554Y     |
| 8219 | <i>SORCS1</i>    | 114815    | 10 | 108923879 | Missense        | C   | T  | 0.132 | p.G136R     |
| 8219 | <i>SPAM1</i>     | 6677      | 7  | 123593649 | Missense        | A   | T  | 0.102 | p.I9F       |
| 8219 | <i>SPDYE6</i>    | 729597    | 7  | 101988870 | Missense        | G   | A  | 0.214 | p.R335C     |
| 8219 | <i>STK25</i>     | 10494     | 2  | 242438696 | Missense        | G   | C  | 0.145 | p.I187M     |
| 8219 | <i>STK39</i>     | 27347     | 2  | 168986103 | Nonsense        | AG  | A  | 0.236 | p.L346X     |
| 8219 | <i>STXBP6</i>    | 29091     | 14 | 25288326  | Missense        | G   | A  | 0.149 | p.R176C     |
| 8219 | <i>TBC1D26</i>   | 353149    | 17 | 15641610  | Missense        | A   | G  | 0.067 | p.Y99C      |
| 8219 | <i>TMC7</i>      | 79905     | 16 | 19070833  | Missense        | C   | A  | 0.157 | p.S708Y     |
| 8219 | <i>TMEM14B</i>   | 81853     | 6  | 10756728  | Missense        | C   | T  | 0.167 | p.R108C     |
| 8219 | <i>TMEM151A</i>  | 256472    | 11 | 66061904  | Missense        | C   | T  | 0.053 | p.R63C      |
| 8219 | <i>TUBB4B</i>    | 10383     | 9  | 140137185 | Missense        | C   | T  | 0.035 | p.S172L     |
| 8219 | <i>UBL4B</i>     | 164153    | 1  | 110655326 | Missense        | C   | T  | 0.12  | p.S57F      |
| 8219 | <i>ULBP2</i>     | 80328     | 6  | 150263287 | Missense        | C   | G  | 0.224 | p.R27G      |
| 8219 | <i>UPF1</i>      | 5976      | 19 | 18966795  | Nonsense        | C   | T  | 0.079 | p.Q536X     |
| 8219 | <i>VASP</i>      | 7408      | 19 | 46025691  | Missense        | C   | T  | 0.082 | p.S191L     |
| 8219 | <i>VSX1</i>      | 30813     | 20 | 25059442  | Missense        | C   | T  | 0.041 | p.R217H     |
| 8219 | <i>XIRP2</i>     | 129446    | 2  | 168106146 | Nonsense        | T   | A  | 0.118 | p.Y2748X    |
| 8219 | <i>ZFHX4</i>     | 79776     | 8  | 77617275  | Missense        | G   | A  | 0.101 | p.V318I     |
| 8219 | <i>ZNF222</i>    | 7673      | 19 | 44536834  | Missense        | C   | G  | 0.043 | p.T336S     |
| 8219 | <i>ZNF273</i>    | 10793     | 7  | 64388350  | Missense        | G   | T  | 0.067 | p.C215F     |
| 8219 | <i>ZNF423</i>    | 23090     | 16 | 49670092  | Missense        | G   | A  | 0.121 | p.R991C     |
| 8219 | <i>ZNF598</i>    | 90850     | 16 | 2051014   | Missense        | C   | T  | 0.032 | p.E398K     |
| 8219 | <i>ZNF681</i>    | 148213    | 19 | 23926688  | Missense        | A   | G  | 0.5   | p.I555T     |
| 8219 | <i>ZNF780B</i>   | 163131    | 19 | 40541357  | Missense        | C   | T  | 0.167 | p.G470E     |
| 8219 | <i>ZNF93</i>     | 81931     | 19 | 20044524  | Missense        | A   | G  | 0.667 | p.K254E     |
| 8210 | <i>ADAMTS8</i>   | 11095     | 11 | 130275472 | Missense        | C   | A  | 0.149 | p.S884I     |
| 8210 | <i>ADNP2</i>     | 22850     | 18 | 77895175  | Missense        | C   | T  | 0.277 | p.P627S     |
| 8210 | <i>AKAP6</i>     | 9472      | 14 | 33293295  | Missense        | G   | C  | 0.231 | p.E2092D    |
| 8210 | <i>ALDH1L1</i>   | 10840     | 3  | 125873433 | Missense        | G   | T  | 0.37  | p.D228E     |
| 8210 | <i>AUP1</i>      | 550       | 2  | 74756261  | Missense        | T   | A  | 0.091 | p.T113S     |
| 8210 | <i>BBOX1-AS1</i> | 103695435 | 11 | 27141284  | Missense        | A   | G  | 0.194 | p.K243R     |
| 8210 | <i>CACNA1C</i>   | 775       | 12 | 2675592   | Missense        | T   | C  | 0.35  | p.Y505H     |
| 8210 | <i>CARD6</i>     | 84674     | 5  | 40852749  | Missense        | C   | T  | 0.239 | p.P439S     |
| 8210 | <i>CEP120</i>    | 153241    | 5  | 122685675 | Nonsense        | G   | A  | 0.169 | p.R897X     |
| 8210 | <i>CES2</i>      | 8824      | 16 | 66973233  | Missense        | C   | A  | 0.154 | p.A196D     |
| 8210 | <i>CHSY3</i>     | 337876    | 5  | 129241112 | Missense        | G   | A  | 0.361 | p.R197H     |
| 8210 | <i>CNTROB</i>    | 116840    | 17 | 7838452   | Missense        | A   | C  | 0.333 | p.T195P     |
| 8210 | <i>CNTROB</i>    | 116840    | 17 | 7838356   | Missense        | G   | A  | 0.297 | p.E163K     |
| 8210 | <i>CSMD1</i>     | 64478     | 8  | 2910136   | Missense        | T   | A  | 0.089 | p.N2503I    |
| 8210 | <i>DDX25</i>     | 29118     | 11 | 125788550 | Missense        | G   | A  | 0.196 | p.V356M     |
| 8210 | <i>DENND2A</i>   | 27147     | 7  | 140301486 | Missense        | A   | G  | 0.242 | p.S238P     |
| 8210 | <i>DHX9</i>      | 1660      | 1  | 182812436 | Missense        | T   | G  | 0.333 | p.V40G      |
| 8210 | <i>ELL3</i>      | 80237     | 15 | 44069069  | Missense        | G   | C  | 0.048 | p.Q11E      |
| 8210 | <i>FAM198A</i>   | 729085    | 3  | 43074074  | Missense        | T   | A  | 0.25  | p.S107T     |
| 8210 | <i>FANCA</i>     | 2175      | 16 | 89839766  | Missense        | G   | C  | 0.083 | p.P643A     |
| 8210 | <i>FBXO28</i>    | 23219     | 1  | 224301957 | Missense        | G   | T  | 0.055 | p.Q42H      |
| 8210 | <i>FEZF2</i>     | 55079     | 3  | 62357891  | Missense        | A   | G  | 0.194 | p.L218P     |
| 8210 | <i>FMO3</i>      | 2328      | 1  | 171086458 | Missense        | G   | A  | 0.255 | p.R492Q     |
| 8210 | <i>FSIP2</i>     | 401024    | 2  | 186672791 | Missense        | T   | G  | 0.233 | p.V6342G    |
| 8210 | <i>GALNT6</i>    | 11226     | 12 | 51773546  | Missense        | C   | G  | 0.4   | p.R7P       |

|      |                   |           |    |           |                 |     |    |       |             |
|------|-------------------|-----------|----|-----------|-----------------|-----|----|-------|-------------|
| 8210 | <i>GOLGB1</i>     | 2804      | 3  | 121413186 | Missense        | C   | T  | 0.124 | p.E2057K    |
| 8210 | <i>GPR62</i>      | 118442    | 3  | 51989672  | Missense        | G   | A  | 0.073 | p.A2T       |
| 8210 | <i>GUCY1A2</i>    | 2977      | 11 | 106681150 | Missense        | A   | C  | 0.235 | p.F421V     |
| 8210 | <i>HTR3D</i>      | 200909    | 3  | 183756702 | Missense        | G   | A  | 0.047 | p.R435H     |
| 8210 | <i>HTRA3</i>      | 94031     | 4  | 8293220   | Nonsense        | C   | T  | 0.097 | p.Q278X     |
| 8210 | <i>IGSF9B</i>     | 22997     | 11 | 133790369 | Missense        | G   | A  | 0.119 | p.S1084F    |
| 8210 | <i>ISM1</i>       | 140862    | 20 | 13279843  | Missense        | A   | G  | 0.246 | p.T378A     |
| 8210 | <i>ITGAX</i>      | 3687      | 16 | 31374535  | Missense        | C   | G  | 0.06  | p.P517R     |
| 8210 | <i>ITPR3</i>      | 3710      | 6  | 33643602  | Missense        | A   | T  | 0.3   | p.Q1084L    |
| 8210 | <i>KIAA1217</i>   | 56243     | 10 | 24832383  | Missense        | T   | C  | 0.076 | p.L1395P    |
| 8210 | <i>KRT6A</i>      | 3853      | 12 | 52885485  | Missense        | T   | G  | 0.222 | p.E192D     |
| 8210 | <i>LOC401052</i>  | 401052    | 3  | 10049098  | Missense        | T   | G  | 0.545 | p.H96P      |
| 8210 | <i>MDN1</i>       | 23195     | 6  | 90428947  | Splice_Site     | A   | G  | 0.293 | c.5968-3T>C |
| 8210 | <i>MEGF6</i>      | 1953      | 1  | 3410641   | Missense        | A   | G  | 0.25  | p.C1393R    |
| 8210 | <i>MGAT4C</i>     | 25834     | 12 | 86373774  | Missense        | G   | T  | 0.274 | p.L244I     |
| 8210 | <i>MLH1</i>       | 4292      | 3  | 37070421  | Missense        | A   | G  | 0.244 | p.E278G     |
| 8210 | <i>MXRA5</i>      | 25878     | X  | 3228144   | Missense        | C   | G  | 0.069 | p.E2700D    |
| 8210 | <i>NBPF3</i>      | 84224     | 1  | 21799922  | Missense        | G   | A  | 0.432 | p.E262K     |
| 8210 | <i>NFASC</i>      | 23114     | 1  | 204951007 | Missense        | A   | G  | 0.136 | p.N777D     |
| 8210 | <i>T5C1B-RDHI</i> | 100526794 | 2  | 18757622  | Missense        | G   | A  | 0.218 | p.A446V     |
| 8210 | <i>OR5T3</i>      | 390154    | 11 | 56020112  | Missense        | C   | T  | 0.344 | p.A146V     |
| 8210 | <i>PABPC1</i>     | 26986     | 8  | 101724606 | Missense        | G   | A  | 0.192 | p.T319I     |
| 8210 | <i>PCDHGA2</i>    | 56113     | 5  | 140725208 | Missense        | C   | G  | 0.32  | p.D536E     |
| 8210 | <i>PCGF6</i>      | 84108     | 10 | 105108528 | Missense        | T   | C  | 0.167 | p.R168G     |
| 8210 | <i>PDP1</i>       | 54704     | 8  | 94929311  | Splice_Site     | C   | T  | 0.059 | .           |
| 8210 | <i>PPF1A</i>      | 8499      | 12 | 81671174  | Missense        | T   | A  | 0.111 | p.I1078F    |
| 8210 | <i>RASL11A</i>    | 387496    | 13 | 27847182  | Nonsense        | C   | T  | 0.222 | p.Q94X      |
| 8210 | <i>ROBO2</i>      | 6092      | 3  | 77671485  | Missense        | C   | T  | 0.074 | p.A628V     |
| 8210 | <i>RPS6KA6</i>    | 27330     | X  | 83442896  | Missense        | G   | T  | 0.154 | p.F4L       |
| 8210 | <i>RWDD2B</i>     | 10069     | 21 | 30380178  | Missense        | G   | T  | 0.308 | p.A210E     |
| 8210 | <i>SCRN2</i>      | 90507     | 17 | 45916270  | Missense        | C   | T  | 0.067 | p.G220E     |
| 8210 | <i>SEMA3D</i>     | 223117    | 7  | 84628854  | Missense        | C   | G  | 0.11  | p.G746R     |
| 8210 | <i>SEMA3E</i>     | 9723      | 7  | 83095913  | Missense        | T   | A  | 0.3   | p.E114V     |
| 8210 | <i>SEMA3G</i>     | 56920     | 3  | 52475330  | Missense        | C   | T  | 0.215 | p.D255N     |
| 8210 | <i>SERPINE2</i>   | 5270      | 2  | 224866369 | Nonsense        | G   | C  | 0.219 | p.Y83X      |
| 8210 | <i>SI</i>         | 6476      | 3  | 164737524 | Missense        | C   | T  | 0.3   | p.D1097N    |
| 8210 | <i>SIRPB1</i>     | 10326     | 20 | 1546911   | Missense        | C   | G  | 0.088 | p.A363P     |
| 8210 | <i>SLC7A14</i>    | 57709     | 3  | 170244554 | Missense        | G   | T  | 0.327 | p.L58I      |
| 8210 | <i>SORCS1</i>     | 114815    | 10 | 108427559 | Missense        | C   | A  | 0.29  | p.D731Y     |
| 8210 | <i>SPTAN1</i>     | 6709      | 9  | 131370483 | Missense        | A   | C  | 0.378 | p.K1473N    |
| 8210 | <i>STXBP5</i>     | 134957    | 6  | 147527111 | Missense        | T   | G  | 0.136 | p.V52G      |
| 8210 | <i>TCHH</i>       | 7062      | 1  | 152081482 | Missense        | C   | T  | 0.083 | p.R1404H    |
| 8210 | <i>TINF2</i>      | 26277     | 14 | 24709911  | Missense        | T   | C  | 0.323 | p.N259D     |
| 8210 | <i>TMEM106C</i>   | 79022     | 12 | 48359115  | Missense        | C   | T  | 0.067 | p.R80C      |
| 8210 | <i>TMEM189</i>    | 387521    | 20 | 48746208  | Missense        | C   | T  | 0.382 | p.R118Q     |
| 8210 | <i>TMEM260</i>    | 54916     | 14 | 57101635  | Missense        | G   | T  | 0.07  | p.W581C     |
| 8210 | <i>TRAM1L1</i>    | 133022    | 4  | 118006089 | Missense        | T   | A  | 0.272 | p.K154M     |
| 8210 | <i>UNC80</i>      | 285175    | 2  | 210698825 | Missense        | G   | A  | 0.283 | p.E954K     |
| 8210 | <i>USP48</i>      | 84196     | 1  | 22021633  | Nonsense        | G   | A  | 0.051 | p.R937X     |
| 8210 | <i>USP8</i>       | 9101      | 15 | 50784955  | Missense        | C   | A  | 0.098 | p.N764K     |
| 8210 | <i>USP8</i>       | 9101      | 15 | 50784950  | Missense        | C   | T  | 0.079 | p.R763W     |
| 8210 | <i>WDFY3</i>      | 23001     | 4  | 85662943  | Missense        | T   | G  | 0.088 | p.I2069L    |
| 8210 | <i>YES1</i>       | 7525      | 18 | 743097    | Missense        | C   | A  | 0.227 | p.G294V     |
| 8210 | <i>ZNF311</i>     | 282890    | 6  | 28963727  | Missense        | A   | T  | 0.273 | p.L351H     |
| 8210 | <i>ZNF331</i>     | 55422     | 19 | 54081147  | Missense        | G   | A  | 0.235 | p.G445R     |
| 8210 | <i>ZNF521</i>     | 25925     | 18 | 22806918  | Missense        | C   | A  | 0.214 | p.V322F     |
| 8208 | <i>ADAM21</i>     | 8747      | 14 | 70924335  | Missense        | C   | T  | 0.1   | p.P40L      |
| 8208 | <i>ADARB2</i>     | 105       | 10 | 1405398   | Missense        | C   | T  | 0.2   | p.R301Q     |
| 8208 | <i>ADRBK2</i>     | 157       | 22 | 26100145  | Missense        | G   | A  | 0.136 | p.V433I     |
| 8208 | <i>AEBP1</i>      | 165       | 7  | 44147685  | Splice_Site     | T   | C  | 0.119 | c.940+2T>C  |
| 8208 | <i>ARHGAP22</i>   | 58504     | 10 | 49791064  | Missense        | C   | A  | 0.219 | p.Q56H      |
| 8208 | <i>ARHGAP42</i>   | 143872    | 11 | 100830640 | Missense        | T   | G  | 0.278 | p.F397V     |
| 8208 | <i>ARHGAP42</i>   | 143872    | 11 | 100665883 | Nonsense        | G   | T  | 0.263 | p.E100X     |
| 8208 | <i>ARID1A</i>     | 8289      | 1  | 27087486  | Frame_Shift_Ins | C   | CA | 0.216 | p.P687fs    |
| 8208 | <i>ARPP21</i>     | 10777     | 3  | 35748548  | Missense        | T   | A  | 0.169 | p.S257T     |
| 8208 | <i>ATP2C2</i>     | 9914      | 16 | 84449147  | Missense        | G   | A  | 0.191 | p.V192I     |
| 8208 | <i>BBS4</i>       | 585       | 15 | 73023725  | Missense        | G   | T  | 0.154 | p.C264F     |
| 8208 | <i>BEND2</i>      | 139105    | X  | 18220008  | Missense        | A   | C  | 0.229 | p.N320K     |
| 8208 | <i>BRD8</i>       | 10902     | 5  | 137503739 | Missense        | G   | A  | 0.556 | p.S297F     |
| 8208 | <i>BTBD19</i>     | 149478    | 1  | 45275892  | Missense        | T   | C  | 0.217 | p.C32R      |
| 8208 | <i>C10orf126</i>  | 283080    | 10 | 29137210  | Missense        | A   | C  | 0.141 | p.N30T      |
| 8208 | <i>C16orf78</i>   | 123970    | 16 | 49433091  | Missense        | A   | C  | 0.198 | p.K234Q     |
| 8208 | <i>CAMSAP3</i>    | 57662     | 19 | 7675643   | Missense        | G   | A  | 0.3   | p.D347N     |
| 8208 | <i>CCDC154</i>    | 645811    | 16 | 1486514   | Frame_Shift_Del | ACT | A  | 0.223 | p.S473fs    |
| 8208 | <i>CELSR3</i>     | 1951      | 3  | 48698827  | Missense        | G   | A  | 0.234 | p.S414L     |
| 8208 | <i>CERCAM</i>     | 51148     | 9  | 131196765 | Missense        | T   | C  | 0.243 | p.Y470H     |
| 8208 | <i>CFTR</i>       | 1080      | 7  | 117232304 | Frame_Shift_Del | GA  | G  | 0.157 | p.E695fs    |
| 8208 | <i>CHD2</i>       | 1106      | 15 | 93499712  | Nonsense        | G   | A  | 0.143 | p.W611X     |
| 8208 | <i>CHRD</i>       | 8646      | 3  | 184104344 | Missense        | T   | G  | 0.588 | p.V666G     |
| 8208 | <i>CHST1</i>      | 8534      | 11 | 45672368  | Missense        | C   | T  | 0.212 | p.G36R      |



|      |                   |           |    |           |                 |          |   |       |             |
|------|-------------------|-----------|----|-----------|-----------------|----------|---|-------|-------------|
| 8208 | <i>CHSY3</i>      | 337876    | 5  | 129241112 | Missense        | G        | A | 0.317 | p.R197H     |
| 8208 | <i>CLEC14A</i>    | 161198    | 14 | 38724047  | Missense        | G        | A | 0.058 | p.S394F     |
| 8208 | <i>CMYA5</i>      | 202333    | 5  | 79031372  | Missense        | G        | C | 0.071 | p.V2262L    |
| 8208 | <i>COL22A1</i>    | 169044    | 8  | 139609182 | Missense        | C        | T | 0.18  | p.R1466Q    |
| 8208 | <i>COL9A1</i>     | 1297      | 6  | 70942475  | Splice_Site     | C        | G | 0.254 | c.1586-1G>C |
| 8208 | <i>CORO6</i>      | 84940     | 17 | 27946777  | Missense        | A        | C | 0.175 | p.D71E      |
| 8208 | <i>CRB1</i>       | 23418     | 1  | 197404281 | Missense        | T        | G | 0.217 | p.C1072W    |
| 8208 | <i>CYFIP1</i>     | 23191     | 15 | 22956564  | Missense        | T        | G | 0.208 | p.F601V     |
| 8208 | <i>DCAF8L1</i>    | 139425    | X  | 27998800  | Missense        | A        | C | 0.217 | p.L218V     |
| 8208 | <i>DPEP3</i>      | 64180     | 16 | 68012250  | Missense        | G        | T | 0.24  | p.D227E     |
| 8208 | <i>DTNA</i>       | 1837      | 18 | 32374129  | Missense        | A        | G | 0.138 | p.N93D      |
| 8208 | <i>DZANK1</i>     | 55184     | 20 | 18446022  | Splice_Site     | C        | A | 0.182 | .           |
| 8208 | <i>EHMT1</i>      | 79813     | 9  | 140611226 | Missense        | G        | C | 0.176 | p.R78S      |
| 8208 | <i>ENAM</i>       | 10117     | 4  | 71509199  | Missense        | T        | A | 0.309 | p.Y686N     |
| 8208 | <i>FAM189A2</i>   | 9413      | 9  | 71986497  | Missense        | T        | G | 0.132 | p.F32C      |
| 8208 | <i>FAM83H</i>     | 286077    | 8  | 144808396 | Missense        | C        | A | 0.165 | p.V1079F    |
| 8208 | <i>FDFT1</i>      | 2222      | 8  | 11695964  | Missense        | G        | A | 0.25  | p.R367Q     |
| 8208 | <i>FER1L6-AS2</i> | 157376    | 8  | 125072943 | Missense        | T        | C | 0.182 | p.F1047S    |
| 8208 | <i>FUCA2</i>      | 2519      | 6  | 143828529 | Missense        | T        | A | 0.25  | p.Y86F      |
| 8208 | <i>GHITM</i>      | 27069     | 10 | 85904630  | Splice_Site     | G        | A | 0.156 | c.342-1G>A  |
| 8208 | <i>GPAT2</i>      | 150763    | 2  | 96688961  | Missense        | G        | A | 0.047 | p.S681L     |
| 8208 | <i>GPIHBP1</i>    | 338328    | 8  | 144295183 | Missense        | G        | T | 0.089 | p.C14F      |
| 8208 | <i>GRIK4</i>      | 2900      | 11 | 120690497 | Missense        | G        | T | 0.158 | p.V127F     |
| 8208 | <i>HHATL</i>      | 57467     | 3  | 42741254  | Missense        | T        | G | 0.237 | p.K57T      |
| 8208 | <i>HMP19</i>      | 51617     | 5  | 173491322 | Splice_Site     | A        | C | 0.195 | c.213+4A>C  |
| 8208 | <i>HPS1</i>       | 3257      | 10 | 100193820 | Missense        | C        | T | 0.19  | p.V143I     |
| 8208 | <i>HSPG2</i>      | 3339      | 1  | 22199882  | Missense        | C        | G | 0.281 | p.G1260A    |
| 8208 | <i>HSPG2</i>      | 3339      | 1  | 22191440  | Missense        | C        | T | 0.183 | p.A1508T    |
| 8208 | <i>ING1</i>       | 3621      | 13 | 111372190 | Missense        | T        | C | 0.132 | p.W251R     |
| 8208 | <i>KCNK10</i>     | 54207     | 14 | 88729614  | Missense        | A        | T | 0.09  | p.L112M     |
| 8208 | <i>KIF7</i>       | 374654    | 15 | 90190110  | Missense        | G        | A | 0.206 | p.P580L     |
| 8208 | <i>KIF7</i>       | 374654    | 15 | 90176073  | Missense        | C        | A | 0.103 | p.S958I     |
| 8208 | <i>KMT2D</i>      | 8085      | 12 | 49435753  | Frame_Shift_Del | CTTGACCA | G | 0.068 | p.D2037fs   |
| 8208 | <i>LAMA1</i>      | 284217    | 18 | 6977814   | Missense        | T        | G | 0.44  | p.K2086T    |
| 8208 | <i>LMNA</i>       | 4000      | 1  | 156105716 | Nonsense        | C        | T | 0.103 | p.R321X     |
| 8208 | <i>LRT1</i>       | 26103     | 10 | 85993997  | Missense        | A        | C | 0.27  | p.F243V     |
| 8208 | <i>LRR1Q3</i>     | 127255    | 1  | 74507126  | Missense        | C        | A | 0.206 | p.A497S     |
| 8208 | <i>MGAT4C</i>     | 25834     | 12 | 86383228  | Missense        | C        | A | 0.121 | p.V33F      |
| 8208 | <i>MUC2</i>       | 4583      | 11 | 1093286   | Missense        | C        | G | 0.091 | p.T1702S    |
| 8208 | <i>MYO18A</i>     | 399687    | 17 | 27448585  | Missense        | G        | A | 0.111 | p.P451S     |
| 8208 | <i>MYO7B</i>      | 4648      | 2  | 128338363 | Missense        | C        | T | 0.228 | p.T349M     |
| 8208 | <i>MYT1</i>       | 4661      | 20 | 62839425  | Missense        | G        | T | 0.226 | p.E292D     |
| 8208 | <i>NPHP4</i>      | 261734    | 1  | 5964826   | Missense        | G        | C | 0.092 | p.T665S     |
| 8208 | <i>OR11L1</i>     | 391189    | 1  | 248004607 | Missense        | T        | C | 0.22  | p.T198A     |
| 8208 | <i>PCDH17</i>     | 27253     | 13 | 58207755  | Missense        | G        | A | 0.164 | p.G359R     |
| 8208 | <i>PDCD11</i>     | 22984     | 10 | 105184755 | Missense        | C        | A | 0.257 | p.S926R     |
| 8208 | <i>PIEZO2</i>     | 63895     | 18 | 10752785  | Missense        | C        | G | 0.157 | p.S1314T    |
| 8208 | <i>PKHD1L1</i>    | 93035     | 8  | 110476928 | Missense        | G        | A | 0.226 | p.G2623R    |
| 8208 | <i>PLG</i>        | 5340      | 6  | 161139492 | Splice_Site     | A        | C | 0.198 | c.950+4A>C  |
| 8208 | <i>POLR3B</i>     | 55703     | 12 | 106820987 | Missense        | C        | T | 0.353 | p.L372F     |
| 8208 | <i>POP1</i>       | 10940     | 8  | 99170291  | Missense        | C        | T | 0.143 | p.T956M     |
| 8208 | <i>POTEG</i>      | 404785    | 14 | 19553556  | Missense        | G        | A | 0.25  | p.G47E      |
| 8208 | <i>POU3F3</i>     | 5455      | 2  | 105473140 | Missense        | C        | T | 0.159 | p.T391I     |
| 8208 | <i>PPEF2</i>      | 5470      | 4  | 76794377  | Missense        | T        | G | 0.247 | p.D470A     |
| 8208 | <i>PRKRA</i>      | 8575      | 2  | 179309187 | Missense        | G        | T | 0.151 | p.Q120K     |
| 8208 | <i>PRRC2A</i>     | 7916      | 6  | 31605084  | Missense        | G        | A | 0.225 | p.V2106I    |
| 8208 | <i>RADIL</i>      | 55698     | 7  | 4917614   | Missense        | C        | T | 0.182 | p.A53T      |
| 8208 | <i>RAPGEF1</i>    | 2889      | 9  | 134505657 | Missense        | C        | T | 0.277 | p.V237M     |
| 8208 | <i>RINL</i>       | 126432    | 19 | 39367111  | Missense        | T        | C | 0.063 | p.N24D      |
| 8208 | <i>RNU6-81P</i>   | 100873780 | 2  | 132237750 | Missense        | G        | A | 0.07  | p.G162S     |
| 8208 | <i>SAFB2</i>      | 9667      | 19 | 5587279   | Missense        | T        | G | 0.14  | p.Y946S     |
| 8208 | <i>SEMA3B</i>     | 7869      | 3  | 50312998  | Missense        | C        | T | 0.216 | p.R210W     |
| 8208 | <i>SERPINB3</i>   | 6317      | 18 | 61323148  | Missense        | C        | T | 0.131 | p.D306N     |
| 8208 | <i>SPTA1</i>      | 6708      | 1  | 158585162 | Missense        | C        | T | 0.206 | p.R2211H    |
| 8208 | <i>ST6GAL2</i>    | 84620     | 2  | 107460182 | Missense        | G        | T | 0.225 | p.H84Q      |
| 8208 | <i>STAT3</i>      | 6774      | 17 | 40481640  | Missense        | T        | A | 0.379 | p.T389S     |
| 8208 | <i>STEP1</i>      | 79987     | 9  | 113170505 | Missense        | G        | T | 0.24  | p.L2459I    |
| 8208 | <i>TAAR2</i>      | 9287      | 6  | 132938609 | Missense        | A        | C | 0.151 | p.L246V     |
| 8208 | <i>TBC1D26</i>    | 353149    | 17 | 15641610  | Missense        | A        | G | 0.086 | p.Y99C      |
| 8208 | <i>TECTA</i>      | 7007      | 11 | 121037431 | Missense        | A        | G | 0.253 | p.E1843G    |
| 8208 | <i>TOR1AIP2</i>   | 163590    | 1  | 179815786 | Missense        | C        | T | 0.286 | p.R278Q     |
| 8208 | <i>TTN</i>        | 7273      | 2  | 179634421 | Missense        | T        | G | 0.273 | p.T2963P    |
| 8208 | <i>UCN3</i>       | 114131    | 10 | 5415778   | Missense        | T        | A | 0.172 | p.I32N      |
| 8208 | <i>UGT2A1</i>     | 10941     | 4  | 70504805  | Missense        | G        | T | 0.153 | p.A386E     |
| 8208 | <i>YAP1</i>       | 10413     | 11 | 102100625 | Missense        | T        | G | 0.187 | p.L494W     |
| 8208 | <i>ZER1</i>       | 10444     | 9  | 131504925 | Missense        | T        | C | 0.241 | p.N487D     |
| 8208 | <i>ZER1</i>       | 10444     | 9  | 131504936 | Missense        | A        | C | 0.205 | p.L483R     |
| 8208 | <i>ZFP82</i>      | 284406    | 19 | 36884113  | Missense        | G        | A | 0.066 | p.R377C     |
| 8208 | <i>ZNF462</i>     | 58499     | 9  | 109688513 | Missense        | T        | G | 0.178 | p.F774V     |
| 8208 | <i>ZNF880</i>     | 400713    | 19 | 52888359  | Missense        | G        | A | 0.146 | p.R509Q     |

|      |                  |           |    |           |                 |   |     |       |             |
|------|------------------|-----------|----|-----------|-----------------|---|-----|-------|-------------|
| 8199 | <i>ANKRD30B</i>  | 374860    | 18 | 14748484  | Missense        | C | A   | 0.246 | p.S22R      |
| 8199 | <i>ARID1A</i>    | 8289      | 1  | 27099361  | Nonsense        | C | T   | 0.151 | p.Q1200X    |
| 8199 | <i>ATP11AUN</i>  | 400165    | 13 | 113333878 | Missense        | A | C   | 0.25  | p.D62A      |
| 8199 | <i>ATRX</i>      | 546       | X  | 76953110  | Missense        | G | A   | 0.63  | p.S68L      |
| 8199 | <i>BNIP2</i>     | 663       | 15 | 59981515  | Missense        | A | G   | 0.077 | p.V42A      |
| 8199 | <i>CELSR2</i>    | 1952      | 1  | 109811510 | Missense        | G | A   | 0.064 | p.V2171I    |
| 8199 | <i>CGNL1</i>     | 84952     | 15 | 57731056  | Missense        | G | A   | 0.141 | p.V287I     |
| 8199 | <i>CNOT3</i>     | 4849      | 19 | 54646728  | Missense        | G | A   | 0.075 | p.R5H       |
| 8199 | <i>CSMD1</i>     | 64478     | 8  | 2944708   | Missense        | C | A   | 0.196 | p.G2462V    |
| 8199 | <i>DROSHA</i>    | 29102     | 5  | 31515657  | Missense        | G | A   | 0.158 | p.S321L     |
| 8199 | <i>EVI5</i>      | 7813      | 1  | 93163526  | Missense        | G | T   | 0.222 | p.A263D     |
| 8199 | <i>FNI</i>       | 2335      | 2  | 216279651 | Missense        | G | A   | 0.118 | p.T617I     |
| 8199 | <i>FSIP2</i>     | 401024    | 2  | 186671920 | Missense        | A | T   | 0.103 | p.N6052Y    |
| 8199 | <i>GAL3ST2</i>   | 64090     | 2  | 242716380 | Missense        | A | T   | 0.07  | p.M4L       |
| 8199 | <i>GALNT14</i>   | 79623     | 2  | 31168729  | Missense        | G | A   | 0.214 | p.T201M     |
| 8199 | <i>GKAP1</i>     | 80318     | 9  | 86383855  | Missense        | C | A   | 0.105 | p.D206Y     |
| 8199 | <i>GPRC5C</i>    | 55890     | 17 | 72428181  | Missense        | C | T   | 0.064 | p.R2W       |
| 8199 | <i>GUCY1B3</i>   | 2983      | 4  | 156696170 | Missense        | A | T   | 0.208 | p.Y23F      |
| 8199 | <i>HELZ2</i>     | 85441     | 20 | 62194212  | Missense        | C | T   | 0.152 | p.R1988H    |
| 8199 | <i>HS3ST6</i>    | 64711     | 16 | 1961674   | Missense        | G | C   | 0.136 | p.L316V     |
| 8199 | <i>IL3IRA</i>    | 133396    | 5  | 55206444  | Missense        | G | A   | 0.097 | p.S510N     |
| 8199 | <i>KNOPI</i>     | 400506    | 16 | 19725985  | Missense        | G | A   | 0.212 | p.H125Y     |
| 8199 | <i>LAMA2</i>     | 3908      | 6  | 129591877 | Missense        | C | T   | 0.16  | p.L811F     |
| 8199 | <i>LEF1</i>      | 51176     | 4  | 108969874 | Missense        | G | T   | 0.082 | p.A372D     |
| 8199 | <i>LOC401052</i> | 401052    | 3  | 10049098  | Missense        | T | G   | 1     | p.H96P      |
| 8199 | <i>MYBPC2</i>    | 4606      | 19 | 50957397  | Missense        | G | A   | 0.061 | p.V624I     |
| 8199 | <i>MYLK3</i>     | 91807     | 16 | 46773999  | Missense        | C | A   | 0.167 | p.V180L     |
| 8199 | <i>NAE1</i>      | 8883      | 16 | 66839931  | Splice_Site     | T | A   | 0.167 | c.1331-2A>T |
| 8199 | <i>NBPF8</i>     | 728841    | 1  | 148025797 | Missense        | T | A   | 0.294 | p.K352M     |
| 8199 | <i>OR51A2</i>    | 401667    | 11 | 4976013   | Missense        | A | G   | 0.267 | p.W311R     |
| 8199 | <i>OR51A2</i>    | 401667    | 11 | 4976768   | Missense        | C | T   | 0.176 | p.G59E      |
| 8199 | <i>OR51B5</i>    | 282763    | 11 | 5462374   | Missense        | C | T   | 0.07  | p.R124H     |
| 8199 | <i>POT1</i>      | 25913     | 7  | 124511011 | Missense        | G | A   | 0.286 | p.P70L      |
| 8199 | <i>PREX2</i>     | 80243     | 8  | 68965472  | Missense        | C | T   | 0.116 | p.R362W     |
| 8199 | <i>PTPN13</i>    | 5783      | 4  | 87671727  | Nonsense        | A | T   | 0.175 | p.K919X     |
| 8199 | <i>REPS2</i>     | 9185      | X  | 17153504  | Missense        | A | G   | 0.522 | p.M595V     |
| 8199 | <i>SCARA3</i>    | 51435     | 8  | 27516598  | Missense        | T | C   | 0.183 | p.V304A     |
| 8199 | <i>SERTAD1</i>   | 29950     | 19 | 40929363  | Missense        | T | C   | 0.073 | p.T31A      |
| 8199 | <i>SHANK2</i>    | 22941     | 11 | 70331960  | Missense        | G | T   | 0.071 | p.P892T     |
| 8199 | <i>SLC2A5</i>    | 6518      | 1  | 9101924   | Missense        | A | G   | 0.179 | p.V164A     |
| 8199 | <i>SLC46A3</i>   | 283537    | 13 | 29287062  | Missense        | A | G   | 0.094 | p.F272S     |
| 8199 | <i>SYNJ1</i>     | 8867      | 21 | 34059327  | Frame_Shift_Ins | T | TCC | 0.2   | p.G342fs    |
| 8199 | <i>TDRD1</i>     | 56165     | 10 | 115986855 | Missense        | C | G   | 0.188 | p.S1067C    |
| 8199 | <i>THOC5</i>     | 8563      | 22 | 29913074  | Missense        | G | A   | 0.125 | p.A542V     |
| 8199 | <i>TMX4</i>      | 56255     | 20 | 7980441   | Missense        | G | C   | 0.135 | p.I135M     |
| 8199 | <i>UGT2A1</i>    | 10941     | 4  | 70513350  | Missense        | G | A   | 0.167 | p.L5F       |
| 8199 | <i>UNC13C</i>    | 440279    | 15 | 54307147  | Missense        | C | T   | 0.138 | p.L683F     |
| 8199 | <i>ZNF133</i>    | 7692      | 20 | 18287008  | Missense        | A | G   | 0.143 | p.E63G      |
| 8198 | <i>AARS</i>      | 16        | 16 | 70301677  | Missense        | G | C   | 0.065 | p.D369E     |
| 8198 | <i>ACIN1</i>     | 22985     | 14 | 23549285  | Missense        | G | A   | 0.061 | p.S478F     |
| 8198 | <i>AKAP13</i>    | 11214     | 15 | 86122654  | Missense        | T | C   | 0.082 | p.M452T     |
| 8198 | <i>AKAP13</i>    | 11214     | 15 | 86123988  | Missense        | G | A   | 0.07  | p.V897M     |
| 8198 | <i>ARHGEF15</i>  | 22899     | 17 | 8216468   | Missense        | T | C   | 0.16  | p.L277P     |
| 8198 | <i>ASGR2</i>     | 433       | 17 | 7010631   | Missense        | C | T   | 0.073 | p.D120N     |
| 8198 | <i>BCAS1</i>     | 8537      | 20 | 52645166  | Missense        | A | G   | 0.079 | p.V163A     |
| 8198 | <i>BCLAF1</i>    | 9774      | 6  | 136590722 | Missense        | G | A   | 0.167 | p.A691V     |
| 8198 | <i>BRINP2</i>    | 57795     | 1  | 177247854 | Missense        | C | G   | 0.091 | p.L390V     |
| 8198 | <i>CI7orf58</i>  | 284018    | 17 | 65988049  | Missense        | T | C   | 0.095 | p.I92V      |
| 8198 | <i>C6orf136</i>  | 221545    | 6  | 30619209  | Missense        | C | T   | 0.094 | p.R425W     |
| 8198 | <i>CCDC182</i>   | 101927581 | 17 | 55822467  | Missense        | G | A   | 0.1   | p.A56V      |
| 8198 | <i>CEP95</i>     | 90799     | 17 | 62523253  | Missense        | C | T   | 0.25  | p.R393W     |
| 8198 | <i>CFB</i>       | 629       | 6  | 31914180  | Missense        | G | A   | 0.094 | p.R32Q      |
| 8198 | <i>CHID1</i>     | 66005     | 11 | 870446    | Missense        | G | A   | 0.286 | p.A363V     |
| 8198 | <i>CLDN17</i>    | 26285     | 21 | 31538692  | Missense        | C | T   | 0.07  | p.A82T      |
| 8198 | <i>CNPPD1</i>    | 27013     | 2  | 220037666 | Missense        | A | G   | 0.138 | p.L292P     |
| 8198 | <i>CRIL</i>      | 1379      | 1  | 207851611 | Missense        | A | G   | 0.073 | p.R116G     |
| 8198 | <i>CUBN</i>      | 8029      | 10 | 17147521  | Missense        | G | T   | 0.108 | p.P389T     |
| 8198 | <i>DESII</i>     | 27351     | 22 | 41997181  | Missense        | C | T   | 0.182 | p.A143T     |
| 8198 | <i>DNHD1</i>     | 144132    | 11 | 6579106   | Missense        | C | A   | 0.108 | p.H2861N    |
| 8198 | <i>EMILIN3</i>   | 90187     | 20 | 39992391  | Missense        | G | A   | 0.125 | p.T134M     |
| 8198 | <i>ERV3-1</i>    | 2086      | 7  | 64452830  | Missense        | C | T   | 0.065 | p.C192Y     |
| 8198 | <i>FREMI</i>     | 158326    | 9  | 14801769  | Missense        | C | T   | 0.1   | p.R1192H    |
| 8198 | <i>FSIP1</i>     | 161835    | 15 | 39910052  | Missense        | C | G   | 0.071 | p.G528A     |
| 8198 | <i>GMNN</i>      | 51053     | 6  | 24780892  | Missense        | A | C   | 0.083 | p.N18T      |
| 8198 | <i>GNRH1</i>     | 2796      | 8  | 25280756  | Missense        | G | A   | 0.111 | p.R31C      |
| 8198 | <i>HIVEP1</i>    | 3096      | 6  | 12123249  | Missense        | A | G   | 0.056 | p.N1074S    |
| 8198 | <i>HKDC1</i>     | 80201     | 10 | 71026510  | Missense        | C | A   | 0.064 | p.N917K     |
| 8198 | <i>HPS4</i>      | 89781     | 22 | 26854441  | Missense        | G | A   | 0.06  | p.H606Y     |
| 8198 | <i>IGFNI</i>     | 91156     | 1  | 201181217 | Missense        | A | G   | 0.121 | p.D2399G    |
| 8198 | <i>ITLNI</i>     | 55600     | 1  | 160851826 | Missense        | A | T   | 0.111 | p.V109D     |

|      |                    |           |    |           |              |          |   |       |              |
|------|--------------------|-----------|----|-----------|--------------|----------|---|-------|--------------|
| 8198 | <i>KIAA0040</i>    | 9674      | 1  | 175129955 | Missense     | G        | C | 0.073 | p.N65K       |
| 8198 | <i>KXD1</i>        | 79036     | 19 | 18679379  | Missense     | C        | G | 0.114 | p.P157A      |
| 8198 | <i>LCORL</i>       | 254251    | 4  | 17885365  | Missense     | T        | C | 0.143 | p.K596R      |
| 8198 | <i>.OC10192946</i> | 101929468 | 4  | 105412464 | In_Frame_Del | TGCC     | T | 0.12  | p.165_165del |
| 8198 | <i>LRRC8E</i>      | 80131     | 19 | 7963976   | Missense     | T        | C | 0.103 | p.M190T      |
| 8198 | <i>MED14</i>       | 9282      | X  | 40541897  | Nonsense     | G        | A | 0.1   | p.R775X      |
| 8198 | <i>MFSD8</i>       | 256471    | 4  | 128842876 | Missense     | C        | G | 0.067 | p.G385R      |
| 8198 | <i>MKNK1-AS1</i>   | 100507423 | 1  | 47028368  | Missense     | C        | T | 0.2   | p.G306R      |
| 8198 | <i>MROH9</i>       | 80133     | 1  | 170928671 | Missense     | T        | C | 0.12  | p.V74A       |
| 8198 | <i>MXRA5</i>       | 25878     | X  | 3240343   | Missense     | G        | A | 0.111 | p.A1128V     |
| 8198 | <i>MYH15</i>       | 22989     | 3  | 108159977 | Missense     | G        | A | 0.065 | p.T949I      |
| 8198 | <i>MYH6</i>        | 4624      | 14 | 23861811  | Missense     | A        | G | 0.15  | p.V1101A     |
| 8198 | <i>MYH6</i>        | 4624      | 14 | 23854194  | Missense     | C        | A | 0.107 | p.Q1740H     |
| 8198 | <i>MYOM3</i>       | 127294    | 1  | 24406535  | Missense     | G        | A | 0.1   | p.P853S      |
| 8198 | <i>NDUFA6</i>      | 4700      | 22 | 42486723  | Missense     | G        | A | 0.061 | p.A35V       |
| 8198 | <i>OR2AE1</i>      | 81392     | 7  | 99474427  | Missense     | A        | G | 0.068 | p.I77T       |
| 8198 | <i>OR52L1</i>      | 338751    | 11 | 6007899   | Missense     | C        | T | 0.098 | p.D88N       |
| 8198 | <i>OR52N1</i>      | 79473     | 11 | 5809811   | Missense     | G        | T | 0.057 | p.T79N       |
| 8198 | <i>P2RX4</i>       | 5025      | 12 | 121666646 | Missense     | A        | G | 0.062 | p.S258G      |
| 8198 | <i>PCDHGA8</i>     | 9708      | 5  | 140772941 | Missense     | T        | G | 0.073 | p.N187K      |
| 8198 | <i>PCSK1</i>       | 5122      | 5  | 95728974  | Missense     | G        | C | 0.083 | p.Q618E      |
| 8198 | <i>POLQ</i>        | 10721     | 3  | 121208176 | Missense     | T        | C | 0.064 | p.H1201R     |
| 8198 | <i>R3HDM1</i>      | 23518     | 2  | 136393658 | Missense     | A        | G | 0.068 | p.M270V      |
| 8198 | <i>REST</i>        | 5978      | 4  | 57796900  | Missense     | G        | A | 0.077 | p.V626I      |
| 8198 | <i>SI00A7A</i>     | 338324    | 1  | 153391729 | Missense     | G        | A | 0.075 | p.A84T       |
| 8198 | <i>SNX18</i>       | 112574    | 5  | 53815495  | Missense     | A        | C | 0.063 | p.E571D      |
| 8198 | <i>SP1</i>         | 6667      | 12 | 53776124  | In_Frame_Del | AATGGCAC | C | 0.038 | p.132_134del |
| 8198 | <i>SPOCK1</i>      | 6695      | 5  | 136834078 | Missense     | C        | A | 0.179 | p.W57L       |
| 8198 | <i>TFCP2L1</i>     | 29842     | 2  | 122038783 | Missense     | G        | A | 0.107 | p.R43C       |
| 8198 | <i>TFR2</i>        | 7036      | 7  | 100230864 | Missense     | G        | C | 0.097 | p.I238M      |
| 8198 | <i>TMEM104</i>     | 54868     | 17 | 72784932  | Missense     | G        | A | 0.086 | p.V58M       |
| 8198 | <i>TNN</i>         | 63923     | 1  | 175092674 | Missense     | C        | T | 0.1   | p.P930L      |
| 8198 | <i>ZMAT3</i>       | 64393     | 3  | 178748788 | Splice_Site  | C        | A | 0.182 | c.271-1G>T   |
| 8198 | <i>ZNF326</i>      | 284695    | 1  | 90473260  | Missense     | A        | G | 0.053 | p.N189S      |
| 8194 | <i>ACKR2</i>       | 1238      | 3  | 42907112  | Missense     | A        | C | 0.102 | p.Y373S      |
| 8194 | <i>AHNAK2</i>      | 113146    | 14 | 105420215 | Missense     | T        | C | 0.111 | p.T525A      |
| 8194 | <i>ANKRD11</i>     | 29123     | 16 | 89350300  | Missense     | C        | T | 0.397 | p.D884N      |
| 8194 | <i>ANO2</i>        | 57101     | 12 | 6030405   | Missense     | A        | G | 0.071 | p.V108A      |
| 8194 | <i>AOAH</i>        | 313       | 7  | 36763672  | Missense     | C        | T | 0.062 | p.D28N       |
| 8194 | <i>AP3B1</i>       | 8546      | 5  | 77406125  | Nonsense     | G        | T | 0.133 | p.S768X      |
| 8194 | <i>ASCL3</i>       | 56676     | 11 | 8959545   | Missense     | C        | A | 0.094 | p.R55L       |
| 8194 | <i>ATXN3</i>       | 4287      | 14 | 92548719  | Missense     | C        | T | 0.06  | p.A234T      |
| 8194 | <i>BPIFB3</i>      | 359710    | 20 | 31656632  | Missense     | C        | G | 0.071 | p.H334Q      |
| 8194 | <i>C15orf54</i>    | 400360    | 15 | 39544367  | Missense     | G        | A | 0.452 | p.G11S       |
| 8194 | <i>C17orf58</i>    | 284018    | 17 | 65989064  | Missense     | A        | G | 0.419 | p.F67L       |
| 8194 | <i>C19orf53</i>    | 28974     | 19 | 13885484  | Missense     | A        | G | 0.087 | p.K39R       |
| 8194 | <i>C1orf131</i>    | 128061    | 1  | 231374715 | Missense     | G        | C | 0.083 | p.A113G      |
| 8194 | <i>CACNA1S</i>     | 779       | 1  | 201017805 | Missense     | A        | C | 0.238 | p.V1449G     |
| 8194 | <i>CASZ1</i>       | 54897     | 1  | 10711011  | Missense     | C        | T | 0.412 | p.V935M      |
| 8194 | <i>CCDC102B</i>    | 79839     | 18 | 66504349  | Missense     | A        | T | 0.321 | p.R117W      |
| 8194 | <i>CCDC171</i>     | 203238    | 9  | 15920397  | Missense     | C        | T | 0.333 | p.R1244C     |
| 8194 | <i>CD8B</i>        | 926       | 2  | 87042751  | Missense     | G        | A | 0.068 | p.T195I      |
| 8194 | <i>CD93</i>        | 22918     | 20 | 23065209  | Missense     | G        | A | 0.083 | p.P541S      |
| 8194 | <i>CDH17</i>       | 1015      | 8  | 95143172  | Missense     | T        | G | 0.062 | p.E739A      |
| 8194 | <i>CFB</i>         | 629       | 6  | 31916708  | Missense     | A        | C | 0.385 | p.T380P      |
| 8194 | <i>CIZ1</i>        | 25792     | 9  | 130950141 | Splice_Site  | C        | T | 0.222 | c.358+1G>A   |
| 8194 | <i>CMTR2</i>       | 55783     | 16 | 71318577  | Missense     | T        | C | 0.066 | p.N416S      |
| 8194 | <i>COL17A1</i>     | 1308      | 10 | 105824333 | Missense     | G        | A | 0.069 | p.T210M      |
| 8194 | <i>CSMD3</i>       | 114788    | 8  | 113318391 | Missense     | G        | C | 0.226 | p.T2599R     |
| 8194 | <i>DHX8</i>        | 1659      | 17 | 41570872  | Missense     | A        | G | 0.391 | p.N308S      |
| 8194 | <i>DKK2</i>        | 27123     | 4  | 107845794 | Missense     | C        | T | 0.05  | p.R146Q      |
| 8194 | <i>DMXL2</i>       | 23312     | 15 | 51791559  | Missense     | A        | G | 0.058 | p.S1288P     |
| 8194 | <i>DPF3</i>        | 8110      | 14 | 73137942  | Missense     | G        | A | 0.054 | p.H336Y      |
| 8194 | <i>EHBP1</i>       | 23301     | 2  | 62934373  | Missense     | C        | T | 0.136 | p.S16F       |
| 8194 | <i>FAM129A</i>     | 116496    | 1  | 184868364 | Missense     | C        | T | 0.3   | p.R45H       |
| 8194 | <i>FAM65C</i>      | 140876    | 20 | 49225260  | Missense     | C        | T | 0.382 | p.G230S      |
| 8194 | <i>FGFR2</i>       | 2263      | 10 | 123278280 | Missense     | C        | T | 0.34  | p.A335T      |
| 8194 | <i>FMO3</i>        | 2328      | 1  | 171083242 | Missense     | A        | G | 0.069 | p.E308G      |
| 8194 | <i>FREM3</i>       | 166752    | 4  | 144617606 | Missense     | T        | A | 0.205 | p.N1408I     |
| 8194 | <i>GCOM1</i>       | 145781    | 15 | 58001174  | Missense     | A        | C | 0.182 | p.T523P      |
| 8194 | <i>GOLGA1</i>      | 2800      | 9  | 127685506 | Splice_Site  | T        | C | 0.077 | c.433-4A>G   |
| 8194 | <i>GPRI37C</i>     | 283554    | 14 | 53098902  | Missense     | G        | A | 0.078 | p.V248I      |
| 8194 | <i>GPRI50</i>      | 285601    | 5  | 94956626  | Missense     | G        | A | 0.286 | p.R216H      |
| 8194 | <i>GRIN2A</i>      | 2903      | 16 | 9857958   | Missense     | G        | A | 0.068 | p.P1148L     |
| 8194 | <i>HELB</i>        | 92797     | 12 | 66725160  | Missense     | C        | T | 0.068 | p.P966L      |
| 8194 | <i>HLA-A</i>       | 3105      | 6  | 29910693  | Missense     | A        | G | 0.154 | p.Q78R       |
| 8194 | <i>HLA-DQB2</i>    | 3120      | 6  | 32725563  | Missense     | G        | T | 0.143 | p.H248Q      |
| 8194 | <i>HNRNPUL1</i>    | 11100     | 19 | 41807592  | Missense     | C        | T | 0.2   | p.A457V      |
| 8194 | <i>HPS1</i>        | 3257      | 10 | 100179851 | Missense     | T        | C | 0.075 | p.Q603R      |
| 8194 | <i>HS6ST3</i>      | 266722    | 13 | 96743624  | Missense     | C        | T | 0.355 | p.R170W      |

|      |                  |           |    |           |                 |          |    |       |              |
|------|------------------|-----------|----|-----------|-----------------|----------|----|-------|--------------|
| 8194 | <i>IFNAR1</i>    | 3454      | 21 | 34715699  | Missense        | G        | C  | 0.083 | p.V168L      |
| 8194 | <i>IKBKE</i>     | 9641      | 1  | 206665052 | Missense        | C        | T  | 0.079 | p.A602V      |
| 8194 | <i>INADL</i>     | 10207     | 1  | 62516683  | Missense        | G        | C  | 0.077 | p.V1360L     |
| 8194 | <i>IQCC</i>      | 55721     | 1  | 32671899  | Splice_Site     | G        | T  | 0.471 | c.186+1G>T   |
| 8194 | <i>ITGB2</i>     | 3689      | 21 | 46313371  | Missense        | G        | A  | 0.154 | p.T391M      |
| 8194 | <i>KANK1</i>     | 23189     | 9  | 740903    | Missense        | G        | A  | 0.556 | p.G1222D     |
| 8194 | <i>KIAA0391</i>  | 9692      | 14 | 35739609  | Missense        | C        | T  | 0.222 | p.S476L      |
| 8194 | <i>KIAA0586</i>  | 9786      | 14 | 58949289  | Missense        | C        | A  | 0.353 | p.N1054K     |
| 8194 | <i>KIAA1211L</i> | 343990    | 2  | 99439046  | Missense        | C        | A  | 0.286 | p.G564C      |
| 8194 | <i>KIAA1614</i>  | 57710     | 1  | 180905448 | Missense        | G        | T  | 0.088 | p.L801F      |
| 8194 | <i>KIAA1755</i>  | 85449     | 20 | 36869159  | Missense        | G        | T  | 0.273 | p.S458R      |
| 8194 | <i>KIF20B</i>    | 9585      | 10 | 91497912  | Missense        | A        | G  | 0.068 | p.K1065R     |
| 8194 | <i>KRT18</i>     | 3875      | 12 | 53346568  | Missense        | G        | A  | 0.222 | p.R412Q      |
| 8194 | <i>KRT8</i>      | 3856      | 12 | 53298675  | Missense        | A        | C  | 0.25  | p.S31A       |
| 8194 | <i>LDHD</i>      | 197257    | 16 | 75148761  | Missense        | C        | T  | 0.07  | p.A145T      |
| 8194 | <i>LHCGR</i>     | 3973      | 2  | 48915492  | Missense        | G        | A  | 0.424 | p.H482Y      |
| 8194 | <i>LRIF1</i>     | 55791     | 1  | 111493914 | Missense        | G        | C  | 0.179 | p.P531R      |
| 8194 | <i>MAVS</i>      | 57506     | 20 | 3838441   | Missense        | C        | G  | 0.071 | p.Q93E       |
| 8194 | <i>MEP1B</i>     | 4225      | 18 | 29793211  | Missense        | C        | T  | 0.286 | p.S423L      |
| 8194 | <i>MPV17L</i>    | 255027    | 16 | 15489800  | Missense        | C        | T  | 0.333 | p.P16S       |
| 8194 | <i>MUC16</i>     | 94025     | 19 | 9083644   | Missense        | G        | A  | 0.4   | p.P2724L     |
| 8194 | <i>MUC21</i>     | 394263    | 6  | 30955179  | Missense        | G        | C  | 0.097 | p.E409D      |
| 8194 | <i>NBAS</i>      | 51594     | 2  | 15674686  | Missense        | T        | C  | 0.06  | p.I243V      |
| 8194 | <i>NCKAP5</i>    | 344148    | 2  | 133538745 | Missense        | C        | A  | 0.103 | p.R1643S     |
| 8194 | <i>NEK10</i>     | 152110    | 3  | 27346385  | Missense        | G        | A  | 0.133 | p.P294L      |
| 8194 | <i>NGF</i>       | 4803      | 1  | 115829313 | Missense        | G        | A  | 0.049 | p.A35V       |
| 8194 | <i>NLRP8</i>     | 126205    | 19 | 56499279  | Nonstop         | G        | C  | 0.075 | p.X1049Y     |
| 8194 | <i>NOC3L</i>     | 64318     | 10 | 96116960  | Missense        | C        | G  | 0.35  | p.G160A      |
| 8194 | <i>NPC1</i>      | 4864      | 18 | 21120444  | Missense        | T        | C  | 0.064 | p.I858V      |
| 8194 | <i>OBSL1</i>     | 23363     | 2  | 220416942 | Splice_Site     | G        | C  | 0.143 | c.5309-4C>G  |
| 8194 | <i>OR10AD1</i>   | 121275    | 12 | 48597053  | Missense        | A        | G  | 0.107 | p.V8A        |
| 8194 | <i>OR2J2</i>     | 26707     | 6  | 29141849  | Missense        | T        | C  | 0.046 | p.V146A      |
| 8194 | <i>OR5T3</i>     | 390154    | 11 | 56020681  | Missense        | A        | G  | 0.081 | p.K336E      |
| 8194 | <i>OR7G3</i>     | 390883    | 19 | 9237482   | Missense        | C        | T  | 0.389 | p.V49I       |
| 8194 | <i>P2RY4</i>     | 5030      | X  | 69478942  | Missense        | T        | G  | 0.182 | p.N178T      |
| 8194 | <i>PARK2</i>     | 5071      | 6  | 162394338 | Missense        | C        | T  | 0.25  | p.V244I      |
| 8194 | <i>PCDH7</i>     | 5099      | 4  | 30725394  | Missense        | G        | T  | 0.089 | p.V784L      |
| 8194 | <i>PCDHB2</i>    | 56133     | 5  | 140475658 | Missense        | C        | G  | 0.097 | p.F428L      |
| 8194 | <i>PCDHGA9</i>   | 56107     | 5  | 140784974 | Frame_Shift_Ins | C        | CT | 0.378 | p.L819fs     |
| 8194 | <i>PINK1-AS</i>  | 100861548 | 1  | 20972111  | Missense        | G        | A  | 0.143 | p.A340T      |
| 8194 | <i>PLA2G4B</i>   | 100137049 | 15 | 42134097  | Missense        | C        | T  | 0.231 | p.R422C      |
| 8194 | <i>PODXL</i>     | 5420      | 7  | 131195712 | Missense        | G        | A  | 0.093 | p.S194L      |
| 8194 | <i>POTEB3</i>    | 102724631 | 15 | 21051218  | Missense        | C        | A  | 0.429 | p.K414N      |
| 8194 | <i>POU6F2</i>    | 11281     | 7  | 39125590  | Missense        | T        | C  | 0.083 | p.V50A       |
| 8194 | <i>PRDM2</i>     | 7799      | 1  | 14105139  | Missense        | T        | A  | 0.076 | p.D283E      |
| 8194 | <i>PSMB9</i>     | 5698      | 6  | 32825090  | Missense        | G        | A  | 0.065 | p.R60H       |
| 8194 | <i>RAG1</i>      | 5896      | 11 | 36595600  | Missense        | A        | G  | 0.063 | p.H249R      |
| 8194 | <i>RBL2</i>      | 5934      | 16 | 53514529  | Missense        | C        | T  | 0.222 | p.P978S      |
| 8194 | <i>RCAN3</i>     | 11123     | 1  | 24861704  | Missense        | G        | A  | 0.051 | p.R164Q      |
| 8194 | <i>RNU6-81P</i>  | 100873780 | 2  | 132237927 | Missense        | C        | A  | 0.333 | p.R221S      |
| 8194 | <i>SATB2</i>     | 23314     | 2  | 200188627 | Missense        | T        | C  | 0.077 | p.I481V      |
| 8194 | <i>SCN3A</i>     | 6328      | 2  | 165971986 | Missense        | G        | A  | 0.3   | p.P1165S     |
| 8194 | <i>SKIDA1</i>    | 387640    | 10 | 21805652  | Missense        | C        | T  | 0.4   | p.R367Q      |
| 8194 | <i>SKOR1</i>     | 390598    | 15 | 68117300  | Missense        | T        | A  | 0.115 | p.W200R      |
| 8194 | <i>SLC12A2</i>   | 6558      | 5  | 127486939 | Missense        | G        | A  | 0.077 | p.R705H      |
| 8194 | <i>SLC25A32</i>  | 81034     | 8  | 104427541 | Missense        | C        | T  | 0.067 | p.P108L      |
| 8194 | <i>SLC25A39</i>  | 51629     | 17 | 42398518  | Missense        | C        | T  | 0.25  | p.G192D      |
| 8194 | <i>SLC26A6</i>   | 65010     | 3  | 48670827  | Splice_Site     | G        | T  | 0.073 | c.183-4C>A   |
| 8194 | <i>SLCO2B1</i>   | 11309     | 11 | 74883577  | Missense        | G        | A  | 0.064 | p.R312Q      |
| 8194 | <i>SWAP70</i>    | 23075     | 11 | 9769562   | Missense        | C        | G  | 0.082 | p.Q505E      |
| 8194 | <i>SYNGAP1</i>   | 8831      | 6  | 33405878  | Missense        | C        | T  | 0.4   | p.A399V      |
| 8194 | <i>TAF1C</i>     | 9013      | 16 | 84212897  | Missense        | T        | A  | 0.442 | p.T660S      |
| 8194 | <i>TET2</i>      | 54790     | 4  | 106156909 | Nonsense        | C        | T  | 0.718 | p.Q604X      |
| 8194 | <i>TLR1</i>      | 7096      | 4  | 38799710  | Missense        | T        | C  | 0.08  | p.N248S      |
| 8194 | <i>MX2-CTNND</i> | 100528016 | 11 | 57512373  | Missense        | T        | C  | 0.061 | p.M458V      |
| 8194 | <i>TNFRSF8</i>   | 943       | 1  | 12186058  | Missense        | A        | G  | 0.083 | p.S402G      |
| 8194 | <i>TRIO</i>      | 7204      | 5  | 14399078  | Nonsense        | C        | T  | 0.27  | p.R1505X     |
| 8194 | <i>TTYH2</i>     | 94015     | 17 | 72248408  | Missense        | C        | A  | 0.119 | p.D384E      |
| 8194 | <i>UBP1</i>      | 7342      | 3  | 33458266  | Missense        | T        | C  | 0.075 | p.N109S      |
| 8194 | <i>UBQLN3</i>    | 50613     | 11 | 5529920   | Missense        | G        | C  | 0.094 | p.T290S      |
| 8194 | <i>USP24</i>     | 23358     | 1  | 55559689  | Missense        | A        | T  | 0.289 | p.L2092Q     |
| 8194 | <i>VNIR1</i>     | 57191     | 19 | 57967133  | Missense        | G        | A  | 0.074 | p.S241F      |
| 8194 | <i>WDR73</i>     | 84942     | 15 | 85186876  | In_Frame_Del    | 3CTCCGTG | A  | 0.119 | p.315_321del |
| 8194 | <i>ZC3H18</i>    | 124245    | 16 | 88695232  | Missense        | G        | C  | 0.333 | p.A870P      |
| 8194 | <i>ZGRF1</i>     | 55345     | 4  | 113540718 | Missense        | C        | G  | 0.073 | p.L160F      |
| 8194 | <i>ZNF230</i>    | 7773      | 19 | 44515514  | Missense        | C        | A  | 0.103 | p.D441E      |
| 8194 | <i>ZNF230</i>    | 7773      | 19 | 44515074  | Missense        | C        | A  | 0.061 | p.L295I      |
| 8194 | <i>ZNF264</i>    | 9422      | 19 | 57723013  | Missense        | G        | A  | 0.061 | p.R183H      |
| 8194 | <i>ZNF264</i>    | 9422      | 19 | 57723007  | Missense        | G        | C  | 0.06  | p.R181T      |
| 8194 | <i>ZNF345</i>    | 25850     | 19 | 37368669  | Missense        | C        | T  | 0.727 | p.P313S      |

|      |                 |        |    |           |                 |    |    |       |             |
|------|-----------------|--------|----|-----------|-----------------|----|----|-------|-------------|
| 8194 | <i>ZNF419</i>   | 79744  | 19 | 58004346  | Missense        | G  | C  | 0.1   | p.E141Q     |
| 8194 | <i>ZSCAN5B</i>  | 342933 | 19 | 56704404  | Frame_Shift_Del | TG | T  | 0.14  | p.T6fs      |
| 8194 | <i>ZSCAN5B</i>  | 342933 | 19 | 56704400  | Frame_Shift_Ins | A  | AG | 0.128 | p.S8fs      |
| 8194 | <i>ZSWIM3</i>   | 140831 | 20 | 44505973  | Missense        | T  | C  | 0.075 | p.V259A     |
| 8191 | <i>ABCA6</i>    | 23460  | 17 | 67106942  | Missense        | C  | A  | 0.148 | p.D758Y     |
| 8191 | <i>ABCC9</i>    | 10060  | 12 | 22025607  | Missense        | G  | T  | 0.209 | p.A717D     |
| 8191 | <i>ADAM21</i>   | 8747   | 14 | 70924602  | Missense        | T  | G  | 0.131 | p.F129C     |
| 8191 | <i>ADAM21</i>   | 8747   | 14 | 70924613  | Nonsense        | C  | T  | 0.081 | p.R133X     |
| 8191 | <i>AIMIL</i>    | 55057  | 1  | 26671248  | Missense        | A  | G  | 0.071 | p.V634A     |
| 8191 | <i>ALPPL2</i>   | 251    | 2  | 233273207 | Splice_Site     | G  | A  | 0.078 | c.784-4G>A  |
| 8191 | <i>ANKRD12</i>  | 23253  | 18 | 9255982   | Missense        | A  | G  | 0.135 | p.K906R     |
| 8191 | <i>ARMC4</i>    | 55130  | 10 | 28196642  | Missense        | C  | T  | 0.263 | p.V854M     |
| 8191 | <i>ARMC4</i>    | 55130  | 10 | 28250610  | Missense        | C  | A  | 0.1   | p.D425Y     |
| 8191 | <i>ASPSCR1</i>  | 79058  | 17 | 79973185  | Missense        | G  | A  | 0.127 | p.D530N     |
| 8191 | <i>ATP8B1</i>   | 5205   | 18 | 55373719  | Splice_Site     | C  | T  | 0.194 | c.279+3G>A  |
| 8191 | <i>ATR</i>      | 545    | 3  | 142281612 | Missense        | A  | G  | 0.111 | p.M211T     |
| 8191 | <i>BCEHE</i>    | 590    | 3  | 165547699 | Missense        | T  | C  | 0.125 | p.R375G     |
| 8191 | <i>C6orf118</i> | 168090 | 6  | 165715729 | Nonsense        | T  | A  | 0.278 | p.K28X      |
| 8191 | <i>CA8</i>      | 767    | 8  | 61135288  | Missense        | C  | T  | 0.222 | p.G220S     |
| 8191 | <i>CADPS2</i>   | 93664  | 7  | 122078454 | Missense        | C  | A  | 0.146 | p.C806F     |
| 8191 | <i>CAP2</i>     | 10486  | 6  | 17507534  | Missense        | G  | T  | 0.15  | p.W145C     |
| 8191 | <i>CASD1</i>    | 64921  | 7  | 94174854  | Splice_Site     | T  | C  | 0.079 | c.1477-3T>C |
| 8191 | <i>CEP164</i>   | 22897  | 11 | 117267884 | Missense        | A  | G  | 0.094 | p.Q1119R    |
| 8191 | <i>CHL1</i>     | 10752  | 3  | 384664    | Splice_Site     | C  | T  | 0.273 | c.680-3C>T  |
| 8191 | <i>CTRC</i>     | 11330  | 1  | 15771229  | Missense        | G  | A  | 0.269 | p.V208I     |
| 8191 | <i>CXXC5</i>    | 51523  | 5  | 139060788 | Missense        | G  | C  | 0.213 | p.G227A     |
| 8191 | <i>DDX55</i>    | 57696  | 12 | 124104551 | Missense        | A  | G  | 0.075 | p.N556S     |
| 8191 | <i>DENND2A</i>  | 27147  | 7  | 140273781 | Nonsense        | G  | A  | 0.163 | p.R425X     |
| 8191 | <i>DMBT1</i>    | 1755   | 10 | 124330427 | Missense        | C  | T  | 0.036 | p.S54L      |
| 8191 | <i>DMD</i>      | 1756   | X  | 32632562  | Missense        | C  | T  | 0.455 | p.R324K     |
| 8191 | <i>DOTIL</i>    | 84444  | 19 | 2226772   | Missense        | G  | C  | 0.075 | p.V1418L    |
| 8191 | <i>DSCAM</i>    | 1826   | 21 | 42080436  | Missense        | C  | T  | 0.153 | p.C102Y     |
| 8191 | <i>ETAA1</i>    | 54465  | 2  | 67631831  | Missense        | G  | A  | 0.034 | p.E673K     |
| 8191 | <i>F5</i>       | 2153   | 1  | 169519112 | Missense        | C  | T  | 0.125 | p.R513K     |
| 8191 | <i>F5</i>       | 2153   | 1  | 169510139 | Missense        | G  | A  | 0.036 | p.L1397F    |
| 8191 | <i>FAM221B</i>  | 392307 | 9  | 35826038  | Missense        | T  | C  | 0.054 | p.K41E      |
| 8191 | <i>FAM221B</i>  | 392307 | 9  | 35826058  | Missense        | T  | C  | 0.051 | p.H34R      |
| 8191 | <i>FRMD4B</i>   | 23150  | 3  | 69299233  | Missense        | C  | G  | 0.061 | p.E173D     |
| 8191 | <i>GAREM</i>    | 64762  | 18 | 29847959  | Missense        | C  | T  | 0.172 | p.E835K     |
| 8191 | <i>GJB7</i>     | 375519 | 6  | 87994015  | Missense        | A  | G  | 0.067 | p.F206L     |
| 8191 | <i>GLCE</i>     | 26035  | 15 | 69548518  | Missense        | G  | A  | 0.036 | p.E125K     |
| 8191 | <i>GLYATL3</i>  | 389396 | 6  | 49485266  | Missense        | C  | A  | 0.071 | p.Q104K     |
| 8191 | <i>GPC3</i>     | 2719   | X  | 132833929 | Missense        | C  | T  | 0.182 | p.R410Q     |
| 8191 | <i>GPR158</i>   | 57512  | 10 | 25888180  | Missense        | A  | G  | 0.07  | p.I1209V    |
| 8191 | <i>HDAC5</i>    | 10014  | 17 | 42164885  | Missense        | G  | C  | 0.067 | p.D593E     |
| 8191 | <i>HEATR1</i>   | 55127  | 1  | 236719193 | Missense        | A  | G  | 0.048 | p.V1854A    |
| 8191 | <i>IBSP</i>     | 3381   | 4  | 88732746  | Missense        | A  | G  | 0.055 | p.D213G     |
| 8191 | <i>IBSP</i>     | 3381   | 4  | 88732763  | Missense        | A  | G  | 0.045 | p.R219G     |
| 8191 | <i>IDUA</i>     | 3425   | 4  | 982884    | Missense        | C  | T  | 0.068 | p.D615N     |
| 8191 | <i>IGFNI</i>    | 91156  | 1  | 201177278 | Missense        | C  | T  | 0.046 | p.A1086V    |
| 8191 | <i>IL16</i>     | 3603   | 15 | 81598438  | Missense        | C  | T  | 0.035 | p.P1204S    |
| 8191 | <i>ITGA1</i>    | 3672   | 5  | 52096889  | Missense        | C  | A  | 0.043 | p.L221M     |
| 8191 | <i>ITGA8</i>    | 8516   | 10 | 15634287  | Missense        | C  | T  | 0.125 | p.R743Q     |
| 8191 | <i>ITIH3</i>    | 3699   | 3  | 52833448  | Missense        | A  | G  | 0.246 | p.N284D     |
| 8191 | <i>KAZN</i>     | 23254  | 1  | 14925496  | Missense        | G  | T  | 0.208 | p.MII       |
| 8191 | <i>KCNG1</i>    | 3755   | 20 | 49626512  | Missense        | C  | G  | 0.279 | p.G122R     |
| 8191 | <i>KIF20B</i>   | 9585   | 10 | 91497912  | Missense        | A  | G  | 0.13  | p.K1065R    |
| 8191 | <i>KLHDC7B</i>  | 113730 | 22 | 50988180  | Missense        | C  | T  | 0.069 | p.P529S     |
| 8191 | <i>KLHL3</i>    | 26249  | 5  | 137013251 | Missense        | C  | T  | 0.25  | p.V207I     |
| 8191 | <i>KREMEN2</i>  | 79412  | 16 | 3017106   | Missense        | C  | T  | 0.167 | p.S279L     |
| 8191 | <i>KRTAP9-8</i> | 83901  | 17 | 39394482  | Missense        | T  | C  | 0.5   | p.I60T      |
| 8191 | <i>LACTB</i>    | 114294 | 15 | 63414129  | Missense        | C  | T  | 0.241 | p.S20L      |
| 8191 | <i>LIF</i>      | 3976   | 22 | 30639942  | Missense        | C  | T  | 0.226 | p.V103M     |
| 8191 | <i>LRP2</i>     | 4036   | 2  | 170099970 | Missense        | A  | G  | 0.283 | p.S1165P    |
| 8191 | <i>LRRTM4</i>   | 80059  | 2  | 77746099  | Missense        | G  | A  | 0.192 | p.A299V     |
| 8191 | <i>LYPD3</i>    | 27076  | 19 | 43965712  | Nonsense        | G  | A  | 0.169 | p.Q278X     |
| 8191 | <i>MARK3</i>    | 4140   | 14 | 103969233 | Missense        | C  | A  | 0.263 | p.A644D     |
| 8191 | <i>MAST3</i>    | 23031  | 19 | 18255378  | Missense        | G  | A  | 0.267 | p.G867E     |
| 8191 | <i>MCM7</i>     | 4176   | 7  | 99697288  | Missense        | C  | T  | 0.036 | p.C67Y      |
| 8191 | <i>MKRN1</i>    | 23608  | 7  | 140171778 | Missense        | G  | C  | 0.209 | p.D9E       |
| 8191 | <i>MMP25</i>    | 64386  | 16 | 3100259   | Missense        | C  | T  | 0.313 | p.R125C     |
| 8191 | <i>MYO3A</i>    | 53904  | 10 | 26463130  | Missense        | C  | A  | 0.055 | p.R1313S    |
| 8191 | <i>MYO9A</i>    | 4649   | 15 | 72324901  | Missense        | T  | G  | 0.222 | p.N290T     |
| 8191 | <i>NCKAP5</i>   | 344148 | 2  | 133542574 | Missense        | C  | T  | 0.055 | p.V604M     |
| 8191 | <i>NHSL1</i>    | 57224  | 6  | 138794475 | Missense        | A  | G  | 0.239 | p.Y151H     |
| 8191 | <i>NRIP1</i>    | 8204   | 21 | 16337855  | Missense        | G  | A  | 0.188 | p.P887S     |
| 8191 | <i>NSD1</i>     | 64324  | 5  | 176637576 | Missense        | T  | C  | 0.056 | p.S457P     |
| 8191 | <i>NUAK2</i>    | 81788  | 1  | 205272846 | Nonsense        | G  | C  | 0.143 | p.S540X     |
| 8191 | <i>OBSCN</i>    | 84033  | 1  | 228468476 | Missense        | C  | T  | 0.222 | p.R3155W    |
| 8191 | <i>ORI4C36</i>  | 127066 | 1  | 248512767 | Missense        | G  | T  | 0.047 | p.D231Y     |

|      |                    |           |    |           |                 |   |          |       |             |
|------|--------------------|-----------|----|-----------|-----------------|---|----------|-------|-------------|
| 8191 | <i>OR14C36</i>     | 127066    | 1  | 248512749 | Missense        | G | A        | 0.041 | p.G225R     |
| 8191 | <i>OR2A2</i>       | 442361    | 7  | 143806941 | Missense        | G | T        | 0.228 | p.R89I      |
| 8191 | <i>OR2AE1</i>      | 81392     | 7  | 99474427  | Missense        | A | G        | 0.036 | p.I77T      |
| 8191 | <i>OR4E2</i>       | 26686     | 14 | 22133648  | Missense        | G | A        | 0.041 | p.V118M     |
| 8191 | <i>OR4L1</i>       | 122742    | 14 | 20528633  | Missense        | T | C        | 0.155 | p.F144L     |
| 8191 | <i>OR4X1</i>       | 390113    | 11 | 48286256  | Missense        | C | T        | 0.054 | p.P282S     |
| 8191 | <i>OR5H1</i>       | 26341     | 3  | 97851590  | Missense        | T | C        | 0.5   | p.F17L      |
| 8191 | <i>OR6Y1</i>       | 391112    | 1  | 158516998 | Missense        | G | T        | 0.188 | p.H300N     |
| 8191 | <i>OTOP3</i>       | 347741    | 17 | 72937605  | Missense        | G | A        | 0.073 | p.R64Q      |
| 8191 | <i>PAK2</i>        | 5062      | 3  | 196509577 | Missense        | C | G        | 0.111 | p.S20R      |
| 8191 | <i>PCNXL4</i>      | 64430     | 14 | 60591887  | Missense        | G | A        | 0.067 | p.G766S     |
| 8191 | <i>PDZD2</i>       | 23037     | 5  | 32087374  | Missense        | A | G        | 0.043 | p.T1274A    |
| 8191 | <i>PRKCZ</i>       | 5590      | 1  | 2100985   | Missense        | G | A        | 0.067 | p.G335S     |
| 8191 | <i>PSMD6</i>       | 9861      | 3  | 64009508  | Missense        | T | C        | 0.071 | p.N2D       |
| 8191 | <i>RAD9B</i>       | 144715    | 12 | 110960196 | Missense        | G | A        | 0.061 | p.G211R     |
| 8191 | <i>RAPGEF3</i>     | 10411     | 12 | 48134723  | Nonsense        | C | T        | 0.288 | p.W633X     |
| 8191 | <i>RETSAT</i>      | 54884     | 2  | 85570849  | Missense        | C | T        | 0.167 | p.G536R     |
| 8191 | <i>RSPH3</i>       | 83861     | 6  | 159407446 | Missense        | C | T        | 0.063 | p.R213Q     |
| 8191 | <i>RTP5</i>        | 285093    | 2  | 242814360 | Missense        | T | C        | 0.062 | p.I218T     |
| 8191 | <i>SELE</i>        | 6401      | 1  | 169696946 | Missense        | G | A        | 0.05  | p.H468Y     |
| 8191 | <i>SEMA6D</i>      | 80031     | 15 | 48058071  | Missense        | G | A        | 0.061 | p.S478N     |
| 8191 | <i>SETD2</i>       | 29072     | 3  | 47158225  | Nonsense        | G | A        | 0.15  | p.R1492X    |
| 8191 | <i>SH3TC1</i>      | 54436     | 4  | 8218729   | Missense        | C | T        | 0.22  | p.T225M     |
| 8191 | <i>SLCO1C1</i>     | 53919     | 12 | 20905250  | Missense        | C | T        | 0.158 | p.S677F     |
| 8191 | <i>SLFN12</i>      | 55106     | 17 | 33749546  | Missense        | A | G        | 0.065 | p.C168R     |
| 8191 | <i>SOS2</i>        | 6655      | 14 | 50626524  | Missense        | C | A        | 0.167 | p.V493F     |
| 8191 | <i>SPATA18</i>     | 132671    | 4  | 52935984  | Splice_Site     | C | A        | 0.209 | c.423-3C>A  |
| 8191 | <i>SPHKAP</i>      | 80309     | 2  | 228882679 | Missense        | C | T        | 0.153 | p.R964K     |
| 8191 | <i>SPNS3</i>       | 201305    | 17 | 4356394   | Missense        | T | A        | 0.273 | p.V336D     |
| 8191 | <i>SPOCD1</i>      | 90853     | 1  | 32280610  | Missense        | T | C        | 0.061 | p.T109A     |
| 8191 | <i>SRSF4</i>       | 6429      | 1  | 29485976  | Missense        | A | C        | 0.143 | p.S91R      |
| 8191 | <i>SYNJ2</i>       | 8871      | 6  | 158489706 | Missense        | C | T        | 0.181 | p.A582V     |
| 8191 | <i>TCP10</i>       | 6953      | 6  | 167789489 | Missense        | G | A        | 0.213 | p.T218M     |
| 8191 | <i>TDG</i>         | 6996      | 12 | 104376700 | Missense        | A | C        | 0.069 | p.K201T     |
| 8191 | <i>TENM1</i>       | 10178     | X  | 123630915 | Missense        | C | A        | 0.6   | p.V1216L    |
| 8191 | <i>TENM3</i>       | 55714     | 4  | 183721406 | Missense        | G | A        | 0.161 | p.D2668N    |
| 8191 | <i>TFEC</i>        | 22797     | 7  | 115614307 | Frame_Shift_Ins | C | ∗CATCTA∗ | 0.19  | p.E62fs     |
| 8191 | <i>TFE12-TNFSF</i> | 407977    | 17 | 7462969   | Missense        | A | G        | 0.053 | p.N176S     |
| 8191 | <i>TTN</i>         | 7273      | 2  | 179634421 | Missense        | T | G        | 0.226 | p.T2963P    |
| 8191 | <i>UGCG</i>        | 7357      | 9  | 114676902 | Missense        | A | G        | 0.281 | p.K39R      |
| 8191 | <i>USP8</i>        | 9101      | 15 | 50784950  | Missense        | C | T        | 0.118 | p.R763W     |
| 8191 | <i>USP8</i>        | 9101      | 15 | 50784955  | Missense        | C | A        | 0.108 | p.N764K     |
| 8191 | <i>VPS35</i>       | 55737     | 16 | 46710538  | Nonsense        | G | A        | 0.154 | p.Q291X     |
| 8191 | <i>WDR93</i>       | 56964     | 15 | 90260145  | Missense        | T | A        | 0.154 | p.S254T     |
| 8191 | <i>ZFYVE9</i>      | 9372      | 1  | 52729497  | Missense        | G | A        | 0.24  | p.R744K     |
| 8191 | <i>ZNF106</i>      | 64397     | 15 | 42758294  | Missense        | G | A        | 0.07  | p.R25W      |
| 8191 | <i>ZNF229</i>      | 7772      | 19 | 44934151  | Missense        | C | T        | 0.053 | p.E269K     |
| 8191 | <i>ZNF292</i>      | 23036     | 6  | 87968565  | Missense        | A | G        | 0.068 | p.I1740V    |
| 8191 | <i>ZNF326</i>      | 284695    | 1  | 90470688  | Splice_Site     | A | G        | 0.303 | c.98-4A>G   |
| 8191 | <i>ZNF799</i>      | 90576     | 19 | 12502753  | Missense        | G | C        | 0.195 | p.H153Q     |
| 8191 | <i>ZBPB2</i>       | 124626    | 17 | 38028634  | Missense        | G | T        | 0.071 | p.S173I     |
| 8188 | <i>ACAN</i>        | 176       | 15 | 89389030  | Missense        | G | T        | 0.042 | p.G449V     |
| 8188 | <i>ADAM29</i>      | 11086     | 4  | 175898555 | Missense        | C | T        | 0.067 | p.P627S     |
| 8188 | <i>ADAMTS16</i>    | 170690    | 5  | 5209210   | Missense        | G | A        | 0.188 | p.A486T     |
| 8188 | <i>ADAR</i>        | 103       | 1  | 154573967 | Missense        | T | C        | 0.045 | p.K384R     |
| 8188 | <i>ANKRD31</i>     | 256006    | 5  | 74443132  | Missense        | C | T        | 0.053 | p.D702N     |
| 8188 | <i>ANKZF1</i>      | 55139     | 2  | 220097027 | Missense        | C | T        | 0.042 | p.R103C     |
| 8188 | <i>AOAH</i>        | 313       | 7  | 36763672  | Missense        | C | T        | 0.049 | p.D28N      |
| 8188 | <i>CAMKK1</i>      | 84254     | 17 | 3775848   | Missense        | T | C        | 0.052 | p.E413G     |
| 8188 | <i>CAST</i>        | 831       | 5  | 96084271  | Missense        | G | A        | 0.067 | p.R365Q     |
| 8188 | <i>CCDC50</i>      | 152137    | 3  | 191093175 | Missense        | T | A        | 0.056 | p.I258N     |
| 8188 | <i>CHRNA2</i>      | 1135      | 8  | 27328511  | Missense        | G | A        | 0.062 | p.T22I      |
| 8188 | <i>CLEC1B</i>      | 51266     | 12 | 10150961  | Missense        | G | A        | 0.062 | p.S28F      |
| 8188 | <i>CSMD2</i>       | 114784    | 1  | 34068093  | Missense        | A | C        | 0.273 | p.F2198V    |
| 8188 | <i>CSRNP1</i>      | 64651     | 3  | 39184959  | Missense        | C | T        | 0.041 | p.V453I     |
| 8188 | <i>CXorf22</i>     | 170063    | X  | 35969297  | Missense        | G | A        | 0.065 | p.V236M     |
| 8188 | <i>CYLC2</i>       | 1539      | 9  | 105767536 | Missense        | G | A        | 0.121 | p.G208D     |
| 8188 | <i>CYLC2</i>       | 1539      | 9  | 105767481 | Missense        | A | G        | 0.094 | p.K190E     |
| 8188 | <i>DGKH</i>        | 160851    | 13 | 42803263  | Missense        | T | C        | 0.088 | p.V1201A    |
| 8188 | <i>DOCK8</i>       | 81704     | 9  | 433978    | Splice_Site     | A | G        | 0.056 | c.4886+3A>G |
| 8188 | <i>EHHADH</i>      | 1962      | 3  | 184922294 | Missense        | C | T        | 0.064 | p.A274T     |
| 8188 | <i>EIF2AK3</i>     | 9451      | 2  | 88874891  | Missense        | C | A        | 0.073 | p.A704S     |
| 8188 | <i>FARP2</i>       | 9855      | 2  | 242432704 | Splice_Site     | G | C        | 0.041 | c.2896-4G>C |
| 8188 | <i>FHOD3</i>       | 80206     | 18 | 34324091  | Missense        | G | A        | 0.065 | p.V1326I    |
| 8188 | <i>GML</i>         | 2765      | 8  | 143922620 | Missense        | C | T        | 0.051 | p.R54C      |
| 8188 | <i>GNAQ</i>        | 2776      | 9  | 80537095  | Nonsense        | G | T        | 0.129 | p.Y101X     |
| 8188 | <i>IRNPUL2-BSC</i> | 100534595 | 11 | 62458275  | Missense        | T | C        | 0.068 | p.K268R     |
| 8188 | <i>KDM7A</i>       | 80853     | 7  | 139827350 | Missense        | G | A        | 0.051 | p.A198V     |
| 8188 | <i>KIF1B</i>       | 23095     | 1  | 10327514  | Missense        | G | A        | 0.068 | p.R169H     |
| 8188 | <i>KRT8</i>        | 3856      | 12 | 53298699  | Missense        | G | A        | 0.125 | p.R23C      |

|      |                     |           |    |           |                 |       |   |       |              |
|------|---------------------|-----------|----|-----------|-----------------|-------|---|-------|--------------|
| 8188 | <i>KRTAP4-8</i>     | 728224    | 17 | 39254054  | Missense        | A     | T | 0.15  | p.C95S       |
| 8188 | <i>KRTAP9-2</i>     | 83899     | 17 | 39383172  | Missense        | C     | T | 0.121 | p.T89I       |
| 8188 | <i>LCA5</i>         | 167691    | 6  | 80228535  | Missense        | T     | G | 0.051 | p.D26A       |
| 8188 | <i>.OC101929655</i> |           | 15 | 81625385  | Missense        | C     | T | 0.069 | p.C893Y      |
| 8188 | <i>LRRC8E</i>       | 80131     | 19 | 7963952   | Missense        | G     | A | 0.07  | p.R182Q      |
| 8188 | <i>MADD</i>         | 8567      | 11 | 47306628  | Missense        | G     | A | 0.053 | p.R765Q      |
| 8188 | <i>MAGEF1</i>       | 64110     | 3  | 184428903 | Missense        | T     | G | 0.04  | p.E236A      |
| 8188 | <i>MPHOSPH10</i>    | 10199     | 2  | 71366957  | Missense        | C     | A | 0.07  | p.L425M      |
| 8188 | <i>MTERF1</i>       | 7978      | 7  | 91503228  | Missense        | C     | T | 0.075 | p.A274T      |
| 8188 | <i>MUC21</i>        | 394263    | 6  | 30955179  | Missense        | G     | C | 0.346 | p.E409D      |
| 8188 | <i>MUC22</i>        | 100507679 | 6  | 30995786  | Missense        | A     | G | 0.041 | p.T860A      |
| 8188 | <i>MYCT1</i>        | 80177     | 6  | 153019099 | Frame_Shift_Del | GAGAT | G | 0.333 | p.R21fs      |
| 8188 | <i>MYZAP</i>        | 100820829 | 15 | 57925836  | Missense        | C     | T | 0.07  | p.A277V      |
| 8188 | <i>NAF1</i>         | 92345     | 4  | 164048199 | Missense        | G     | C | 0.066 | p.L368V      |
| 8188 | <i>NBPF25P</i>      | 101929780 | 1  | 148582481 | Missense        | A     | G | 0.222 | p.T239A      |
| 8188 | <i>NEB</i>          | 4703      | 2  | 152527572 | Missense        | C     | T | 0.125 | p.V1491M     |
| 8188 | <i>NOP56</i>        | 10528     | 20 | 2635212   | Missense        | A     | G | 0.047 | p.I121V      |
| 8188 | <i>NPSR1</i>        | 387129    | 7  | 34889182  | Missense        | A     | G | 0.062 | p.Q344R      |
| 8188 | <i>NUP160</i>       | 23279     | 11 | 47857253  | Missense        | T     | C | 0.12  | p.T351A      |
| 8188 | <i>ORT6</i>         | 254879    | 1  | 248551636 | Missense        | T     | G | 0.041 | p.S243A      |
| 8188 | <i>OR51B5</i>       | 282763    | 11 | 5462255   | Missense        | C     | G | 0.062 | p.V164L      |
| 8188 | <i>OR51I1</i>       | 390063    | 11 | 5462105   | Missense        | T     | C | 0.054 | p.T214A      |
| 8188 | <i>OR51Q1</i>       | 390061    | 11 | 5443969   | Missense        | A     | C | 0.053 | p.Y180S      |
| 8188 | <i>OR5B12</i>       | 390191    | 11 | 58207203  | Missense        | C     | T | 0.053 | p.C141Y      |
| 8188 | <i>OR5H15</i>       | 403274    | 3  | 97888337  | Missense        | C     | T | 0.065 | p.P265L      |
| 8188 | <i>OR6C70</i>       | 390327    | 12 | 55863224  | Missense        | C     | G | 0.101 | p.K233N      |
| 8188 | <i>OR8D1</i>        | 283159    | 11 | 124180282 | Missense        | A     | C | 0.091 | p.C127W      |
| 8188 | <i>OVGP1</i>        | 5016      | 1  | 111957311 | Missense        | G     | C | 0.051 | p.H604Q      |
| 8188 | <i>PCDH15</i>       | 65217     | 10 | 55755491  | Missense        | C     | T | 0.079 | p.R934Q      |
| 8188 | <i>PCLO</i>         | 27445     | 7  | 82508649  | Splice_Site     | T     | A | 0.062 | c.13654+4A>T |
| 8188 | <i>PRR21</i>        | 643905    | 2  | 240981375 | Missense        | T     | A | 0.067 | p.K342M      |
| 8188 | <i>RAB3GAP1</i>     | 22930     | 2  | 135893372 | Missense        | A     | G | 0.067 | p.N598S      |
| 8188 | <i>RAB4B</i>        | 53916     | 19 | 41289936  | Missense        | G     | A | 0.057 | p.R129Q      |
| 8188 | <i>RETSAT</i>       | 54884     | 2  | 85570857  | Missense        | G     | A | 0.138 | p.A533V      |
| 8188 | <i>RETSAT</i>       | 54884     | 2  | 85570849  | Missense        | C     | T | 0.129 | p.G536R      |
| 8188 | <i>RNU6-71P</i>     | 100873774 | 6  | 56463410  | Missense        | T     | C | 0.087 | p.Q1812R     |
| 8188 | <i>RNU6-81P</i>     | 100873780 | 2  | 132237927 | Missense        | C     | A | 0.182 | p.R221S      |
| 8188 | <i>RXRA</i>         | 6256      | 9  | 137323779 | Missense        | C     | T | 0.054 | p.R358W      |
| 8188 | <i>SCLT1</i>        | 132320    | 4  | 129867280 | Missense        | T     | A | 0.12  | p.S441C      |
| 8188 | <i>SH3RF2</i>       | 153769    | 5  | 145393364 | Missense        | C     | T | 0.047 | p.R267C      |
| 8188 | <i>SH3RF2</i>       | 153769    | 5  | 145442203 | Missense        | G     | C | 0.041 | p.G710A      |
| 8188 | <i>SIGLEC12</i>     | 89858     | 19 | 52001394  | Missense        | A     | T | 0.053 | p.L428H      |
| 8188 | <i>SMYD4</i>        | 114826    | 17 | 1704296   | Missense        | C     | A | 0.077 | p.R131I      |
| 8188 | <i>SPATA16</i>      | 83893     | 3  | 172835125 | Missense        | T     | C | 0.071 | p.M133V      |
| 8188 | <i>SPATA16</i>      | 83893     | 3  | 172835082 | Missense        | C     | T | 0.066 | p.G147E      |
| 8188 | <i>SPOCD1</i>       | 90853     | 1  | 32279629  | Missense        | G     | A | 0.046 | p.R436W      |
| 8188 | <i>TRMT12</i>       | 55039     | 8  | 125463250 | Missense        | T     | C | 0.043 | p.W28R       |
| 8188 | <i>TTN</i>          | 7273      | 2  | 179634421 | Missense        | T     | G | 0.333 | p.T2963P     |
| 8188 | <i>TTN</i>          | 7273      | 2  | 179629461 | Missense        | C     | T | 0.105 | p.V3261M     |
| 8188 | <i>TTN</i>          | 7273      | 2  | 179397561 | Missense        | C     | T | 0.08  | p.R34594H    |
| 8188 | <i>TTN</i>          | 7273      | 2  | 179421694 | Missense        | A     | G | 0.065 | p.I29396T    |
| 8188 | <i>TTN</i>          | 7273      | 2  | 179623758 | Missense        | C     | T | 0.057 | p.S3419N     |
| 8188 | <i>USP8</i>         | 9101      | 15 | 50784950  | Missense        | C     | T | 0.185 | p.R763W      |
| 8188 | <i>USP8</i>         | 9101      | 15 | 50784955  | Missense        | C     | A | 0.133 | p.N764K      |
| 8188 | <i>VPS53</i>        | 55275     | 17 | 526907    | Missense        | G     | T | 0.086 | p.L328I      |
| 8188 | <i>WDYHV1</i>       | 55093     | 8  | 124448804 | Missense        | T     | A | 0.07  | p.F48I       |
| 8188 | <i>ZNF268</i>       | 10795     | 12 | 133780851 | Missense        | G     | C | 0.056 | p.R860T      |
| 8188 | <i>ZNF292</i>       | 23036     | 6  | 87968565  | Missense        | A     | G | 0.079 | p.I1740V     |
| 8188 | <i>ZNF438</i>       | 220929    | 10 | 31138817  | Missense        | G     | A | 0.053 | p.P163S      |
| 8188 | <i>ZNF568</i>       | 374900    | 19 | 37487866  | Missense        | A     | T | 0.136 | p.S425C      |
| 8188 | <i>ZNF568</i>       | 374900    | 19 | 37487873  | Missense        | C     | A | 0.13  | p.A427E      |
| 8186 | <i>ACAN</i>         | 176       | 15 | 89381891  | Splice_Site     | C     | T | 0.301 | c.71-3C>T    |
| 8186 | <i>ACCSL</i>        | 390110    | 11 | 44076778  | Missense        | A     | T | 0.257 | p.E359V      |
| 8186 | <i>ACTN1</i>        | 87        | 14 | 69376113  | Missense        | G     | T | 0.368 | p.S172R      |
| 8186 | <i>ARHGEF37</i>     | 389337    | 5  | 149001551 | Missense        | A     | C | 0.043 | p.M421L      |
| 8186 | <i>ARMC4</i>        | 55130     | 10 | 28250610  | Missense        | C     | A | 0.093 | p.D425Y      |
| 8186 | <i>ARMCX4</i>       | 100131755 | X  | 100749127 | Missense        | A     | G | 0.065 | p.I1851V     |
| 8186 | <i>ASCL3</i>        | 56676     | 11 | 8959545   | Missense        | C     | A | 0.105 | p.R55L       |
| 8186 | <i>ATG4D</i>        | 84971     | 19 | 10657649  | Missense        | C     | T | 0.267 | p.R210C      |
| 8186 | <i>ATL2</i>         | 64225     | 2  | 38604351  | Missense        | A     | G | 0.073 | p.W18R       |
| 8186 | <i>ATP10B</i>       | 23120     | 5  | 160061559 | Missense        | C     | G | 0.212 | p.V395L      |
| 8186 | <i>BRMS1</i>        | 25855     | 11 | 66105194  | Missense        | G     | A | 0.077 | p.A273V      |
| 8186 | <i>C19orf57</i>     | 79173     | 19 | 14000870  | Missense        | C     | T | 0.056 | p.G267R      |
| 8186 | <i>C6orf10</i>      | 10665     | 6  | 32299822  | Missense        | G     | A | 0.073 | p.P145L      |
| 8186 | <i>C6orf15</i>      | 29113     | 6  | 31079643  | Missense        | T     | C | 0.045 | p.K165E      |
| 8186 | <i>C9orf114</i>     | 51490     | 9  | 131584830 | Missense        | G     | A | 0.129 | p.V279M      |
| 8186 | <i>CCDC129</i>      | 223075    | 7  | 31682417  | Missense        | A     | G | 0.299 | p.K488R      |
| 8186 | <i>CHST15</i>       | 51363     | 10 | 125805330 | Missense        | C     | A | 0.186 | p.E133D      |
| 8186 | <i>CPNE4</i>        | 131034    | 3  | 131624196 | Missense        | G     | T | 0.207 | p.A49E       |
| 8186 | <i>DNAH7</i>        | 56171     | 2  | 196681503 | Missense        | G     | A | 0.062 | p.R3204C     |

|      |                 |           |    |           |                 |   |        |       |            |
|------|-----------------|-----------|----|-----------|-----------------|---|--------|-------|------------|
| 8186 | <i>DNTT</i>     | 1791      | 10 | 98078272  | Missense        | C | T      | 0.247 | p.H123Y    |
| 8186 | <i>DPP9</i>     | 91039     | 19 | 4700246   | Missense        | C | A      | 0.429 | p.Q352H    |
| 8186 | <i>EXD3</i>     | 54932     | 9  | 140262426 | Missense        | C | T      | 0.083 | p.A160T    |
| 8186 | <i>FAM107A</i>  | 11170     | 3  | 58555583  | Missense        | T | C      | 0.111 | p.Y2C      |
| 8186 | <i>FHAD1</i>    | 114827    | 1  | 15708540  | Missense        | A | G      | 0.051 | p.I1325V   |
| 8186 | <i>FLG</i>      | 2312      | 1  | 152279729 | Missense        | C | T      | 0.051 | p.G2545R   |
| 8186 | <i>FMN1</i>     | 342184    | 15 | 33446311  | Missense        | G | C      | 0.052 | p.P269A    |
| 8186 | <i>FNDC1</i>    | 84624     | 6  | 159653372 | Missense        | C | T      | 0.227 | p.P610S    |
| 8186 | <i>FRMPD4</i>   | 9758      | X  | 12735245  | Missense        | C | A      | 0.267 | p.D889E    |
| 8186 | <i>FUT6</i>     | 2528      | 19 | 5831672   | Missense        | G | C      | 0.222 | p.R303G    |
| 8186 | <i>GATA3</i>    | 2625      | 10 | 8097678   | Missense        | C | A      | 0.061 | p.N20K     |
| 8186 | <i>GNAQ</i>     | 2776      | 9  | 80537112  | Missense        | T | A      | 0.107 | p.T96S     |
| 8186 | <i>GNAQ</i>     | 2776      | 9  | 80537095  | Nonsense        | G | T      | 0.1   | p.Y101X    |
| 8186 | <i>H6PD</i>     | 9563      | 1  | 9324213   | Missense        | C | T      | 0.056 | p.P554L    |
| 8186 | <i>HCN1</i>     | 348980    | 5  | 45267278  | Missense        | C | T      | 0.278 | p.V566M    |
| 8186 | <i>KANK1</i>    | 23189     | 9  | 712156    | Missense        | T | G      | 0.053 | p.S464A    |
| 8186 | <i>KANK3</i>    | 256949    | 19 | 8389519   | Missense        | C | T      | 0.255 | p.D760N    |
| 8186 | <i>KCNJ5</i>    | 3762      | 11 | 128772576 | Missense        | C | A      | 0.263 | p.G105V    |
| 8186 | <i>KCNMB2</i>   | 10242     | 3  | 178546013 | Missense        | C | T      | 0.389 | p.T92M     |
| 8186 | <i>KCTD3</i>    | 51133     | 1  | 215768764 | Missense        | G | A      | 0.13  | p.S295N    |
| 8186 | <i>KMT2C</i>    | 58508     | 7  | 151945291 | Missense        | G | A      | 0.5   | p.P743L    |
| 8186 | <i>LILRA4</i>   | 23547     | 19 | 54848157  | Missense        | A | G      | 0.114 | p.Y404H    |
| 8186 | <i>LOC13230</i> | 113230    | 19 | 14185226  | Missense        | T | C      | 0.069 | p.V198A    |
| 8186 | <i>LRG1</i>     | 116844    | 19 | 4538599   | Missense        | G | A      | 0.07  | p.P133S    |
| 8186 | <i>LTF</i>      | 4057      | 3  | 46495823  | Frame_Shift_Ins | C | ACTCCT | 0.219 | p.V225fs   |
| 8186 | <i>MAP1A</i>    | 4130      | 15 | 43818052  | Missense        | G | A      | 0.062 | p.D1461N   |
| 8186 | <i>MAP2K3</i>   | 5606      | 17 | 21203941  | Missense        | G | A      | 0.075 | p.A84T     |
| 8186 | <i>MBTD1</i>    | 54799     | 17 | 49297755  | Missense        | C | A      | 0.186 | p.S75I     |
| 8186 | <i>MECOM</i>    | 2122      | 3  | 168806883 | Missense        | C | G      | 0.172 | p.D1164H   |
| 8186 | <i>MGAM</i>     | 8972      | 7  | 141750064 | Missense        | T | C      | 0.242 | p.C873R    |
| 8186 | <i>MGAM</i>     | 8972      | 7  | 141736744 | Missense        | G | A      | 0.232 | p.R733Q    |
| 8186 | <i>MROH2A</i>   | 339766    | 2  | 234704345 | Missense        | T | C      | 0.087 | p.V341A    |
| 8186 | <i>MTHFD1L</i>  | 25902     | 6  | 151265685 | Missense        | G | A      | 0.088 | p.A502T    |
| 8186 | <i>MUC17</i>    | 140453    | 7  | 100677210 | Missense        | C | T      | 0.053 | p.T838I    |
| 8186 | <i>MYO7B</i>    | 4648      | 2  | 128388862 | Missense        | G | C      | 0.042 | p.E1647D   |
| 8186 | <i>MYO9B</i>    | 4650      | 19 | 17273802  | Missense        | T | A      | 0.25  | p.L514Q    |
| 8186 | <i>NEK1</i>     | 4750      | 4  | 170354703 | Missense        | C | T      | 0.2   | p.E960K    |
| 8186 | <i>NMRAL1</i>   | 57407     | 16 | 4511926   | Missense        | G | A      | 0.065 | p.P252L    |
| 8186 | <i>NPEPPS</i>   | 9520      | 17 | 45664593  | Splice_Site     | C | T      | 0.138 | c.981-3C>T |
| 8186 | <i>NRCAM</i>    | 4897      | 7  | 107847998 | Missense        | C | G      | 0.185 | p.W394S    |
| 8186 | <i>OBSCN</i>    | 84033     | 1  | 228528563 | Missense        | C | G      | 0.15  | p.Q6848E   |
| 8186 | <i>ODF3L1</i>   | 161753    | 15 | 76019798  | Missense        | C | T      | 0.141 | p.H248Y    |
| 8186 | <i>OR51M1</i>   | 390059    | 11 | 5411395   | Missense        | C | A      | 0.049 | p.P256H    |
| 8186 | <i>OR52I2</i>   | 143502    | 11 | 4608262   | Missense        | A | C      | 0.13  | p.I74L     |
| 8186 | <i>OR6T1</i>    | 219874    | 11 | 123814356 | Missense        | G | A      | 0.063 | p.R64W     |
| 8186 | <i>OR9Q1</i>    | 219956    | 11 | 57947716  | Missense        | C | T      | 0.042 | p.S267L    |
| 8186 | <i>PAX1</i>     | 5075      | 20 | 21687604  | Missense        | G | T      | 0.202 | p.G272V    |
| 8186 | <i>PAX6</i>     | 5080      | 11 | 31822387  | Missense        | T | G      | 0.156 | p.R139S    |
| 8186 | <i>PLA2R1</i>   | 22925     | 2  | 160862163 | Missense        | G | A      | 0.192 | p.R612C    |
| 8186 | <i>PLEKHG2</i>  | 64857     | 19 | 39915758  | Missense        | C | G      | 0.065 | p.P1329A   |
| 8186 | <i>PMFBP1</i>   | 83449     | 16 | 72174385  | Missense        | C | T      | 0.2   | p.V100I    |
| 8186 | <i>POM121L2</i> | 94026     | 6  | 27279774  | Missense        | C | T      | 0.042 | p.R59Q     |
| 8186 | <i>POTEG</i>    | 404785    | 14 | 19553451  | Missense        | C | T      | 0.5   | p.S12F     |
| 8186 | <i>PPARGC1B</i> | 133522    | 5  | 149212430 | Missense        | G | A      | 0.068 | p.R265Q    |
| 8186 | <i>PRRC2B</i>   | 84726     | 9  | 134351102 | Nonsense        | C | T      | 0.229 | p.R1196X   |
| 8186 | <i>RBM33</i>    | 155435    | 7  | 155465602 | Missense        | G | A      | 0.115 | p.G55D     |
| 8186 | <i>RNFT2</i>    | 84900     | 12 | 117217115 | Missense        | G | A      | 0.06  | p.V282M    |
| 8186 | <i>RREB1</i>    | 6239      | 6  | 7230680   | Missense        | G | T      | 0.051 | p.G783V    |
| 8186 | <i>SBK3</i>     | 100130827 | 19 | 56052465  | Missense        | G | A      | 0.075 | p.A276V    |
| 8186 | <i>SCNN1G</i>   | 6340      | 16 | 23221162  | Missense        | C | T      | 0.18  | p.S390L    |
| 8186 | <i>SEMA5A</i>   | 9037      | 5  | 9054230   | Missense        | T | G      | 0.176 | p.E886D    |
| 8186 | <i>SKIV2L2</i>  | 23517     | 5  | 54640404  | Missense        | T | G      | 0.279 | p.F321V    |
| 8186 | <i>SLC17A4</i>  | 10050     | 6  | 25779393  | Missense        | G | A      | 0.166 | p.E437K    |
| 8186 | <i>SORCS3</i>   | 22986     | 10 | 106976772 | Nonsense        | G | T      | 0.244 | p.E876X    |
| 8186 | <i>SYCP2</i>    | 10388     | 20 | 58452471  | Missense        | G | A      | 0.261 | p.S1040L   |
| 8186 | <i>TCHH</i>     | 7062      | 1  | 152081921 | Missense        | G | C      | 0.07  | p.L1258V   |
| 8186 | <i>TEPP</i>     | 374739    | 16 | 58019396  | Missense        | G | A      | 0.047 | p.S233N    |
| 8186 | <i>THAP8</i>    | 199745    | 19 | 36530332  | Missense        | G | A      | 0.064 | p.R189W    |
| 8186 | <i>TMC4</i>     | 147798    | 19 | 54664209  | Missense        | G | C      | 0.045 | p.Q683E    |
| 8186 | <i>TMEM178B</i> | 100507421 | 7  | 141137414 | Missense        | G | A      | 0.091 | p.R168H    |
| 8186 | <i>TP53</i>     | 7157      | 17 | 7579472   | Missense        | G | C      | 0.077 | p.P33R     |
| 8186 | <i>TREML4</i>   | 285852    | 6  | 41196605  | Missense        | T | C      | 0.055 | p.W73R     |
| 8186 | <i>TRIM25</i>   | 7706      | 17 | 54991054  | Missense        | G | C      | 0.216 | p.P99R     |
| 8186 | <i>TSPEAR</i>   | 54084     | 21 | 46101939  | Missense        | C | T      | 0.037 | p.V34M     |
| 8186 | <i>UBR4</i>     | 23352     | 1  | 19439210  | Missense        | G | T      | 0.191 | p.T3870N   |
| 8186 | <i>USP34</i>    | 9736      | 2  | 61575224  | Missense        | A | G      | 0.284 | p.M689T    |
| 8186 | <i>USP8</i>     | 9101      | 15 | 50784950  | Missense        | C | T      | 0.167 | p.R763W    |
| 8186 | <i>USP8</i>     | 9101      | 15 | 50784955  | Missense        | C | A      | 0.159 | p.N764K    |
| 8186 | <i>ZBTB32</i>   | 27033     | 19 | 36205622  | Missense        | C | G      | 0.314 | p.L32V     |
| 8186 | <i>ZFH3</i>     | 463       | 16 | 72830973  | Missense        | G | A      | 0.277 | p.P1870S   |



|      |                 |           |    |           |              |         |   |       |              |
|------|-----------------|-----------|----|-----------|--------------|---------|---|-------|--------------|
| 8186 | <i>ZNF117</i>   | 51351     | 7  | 64439701  | Missense     | C       | T | 0.094 | p.C83Y       |
| 8186 | <i>ZNF219</i>   | 51222     | 14 | 21560752  | In_Frame_Del | GGAGGCT | G | 0.03  | p.233_235del |
| 8186 | <i>ZNF302</i>   | 55900     | 19 | 35173717  | Missense     | T       | A | 0.15  | p.H59Q       |
| 8186 | <i>ZNF776</i>   | 284309    | 19 | 58264887  | Missense     | A       | G | 0.234 | p.H130R      |
| 8186 | <i>ZZZ3</i>     | 26009     | 1  | 78034094  | Nonsense     | G       | A | 0.133 | p.Q797X      |
| 8184 | <i>ACSL6</i>    | 23305     | 5  | 131329858 | Missense     | A       | G | 0.034 | p.F46L       |
| 8184 | <i>ADAM21</i>   | 8747      | 14 | 70924335  | Missense     | C       | T | 0.083 | p.P40L       |
| 8184 | <i>AGR3</i>     | 155465    | 7  | 16901609  | Missense     | A       | G | 0.214 | p.M101T      |
| 8184 | <i>AIF1L</i>    | 83543     | 9  | 133981629 | Missense     | T       | C | 0.046 | p.C50R       |
| 8184 | <i>AKNA</i>     | 80709     | 9  | 117124731 | Missense     | G       | A | 0.042 | p.P624L      |
| 8184 | <i>ALPK2</i>    | 115701    | 18 | 56205314  | Missense     | G       | A | 0.297 | p.A702V      |
| 8184 | <i>ALPK2</i>    | 115701    | 18 | 56205262  | Missense     | A       | C | 0.043 | p.H719Q      |
| 8184 | <i>ALX4</i>     | 60529     | 11 | 44331509  | Missense     | C       | G | 0.036 | p.R35T       |
| 8184 | <i>AOAH</i>     | 313       | 7  | 36763672  | Missense     | C       | T | 0.053 | p.D28N       |
| 8184 | <i>ARID3A</i>   | 1820      | 19 | 971949    | Missense     | G       | A | 0.074 | p.G556S      |
| 8184 | <i>ATP8B4</i>   | 79895     | 15 | 50226313  | Missense     | G       | T | 0.073 | p.H452N      |
| 8184 | <i>B3GALTL</i>  | 145173    | 13 | 31821240  | Splice_Site  | C       | T | 0.114 | c.347+4C>T   |
| 8184 | <i>BAGE4</i>    | 85317     | 21 | 11098728  | Missense     | C       | T | 0.063 | p.G4R        |
| 8184 | <i>BAIL1</i>    | 575       | 8  | 143546035 | Missense     | G       | C | 0.068 | p.R159P      |
| 8184 | <i>BDP1</i>     | 55814     | 5  | 70800538  | Missense     | G       | A | 0.075 | p.V778M      |
| 8184 | <i>BIRC7</i>    | 79444     | 20 | 61870727  | Missense     | G       | C | 0.053 | p.E223Q      |
| 8184 | <i>BLZF1</i>    | 8548      | 1  | 169345868 | Missense     | A       | G | 0.083 | p.Q40R       |
| 8184 | <i>BMP2</i>     | 650       | 20 | 6750891   | Missense     | C       | T | 0.266 | p.R40C       |
| 8184 | <i>BTNL8</i>    | 79908     | 5  | 180377470 | Missense     | G       | A | 0.042 | p.A352T      |
| 8184 | <i>BVES-AS1</i> | 154442    | 6  | 105606539 | Missense     | A       | G | 0.338 | p.S228P      |
| 8184 | <i>C15orf39</i> | 56905     | 15 | 75503147  | Missense     | G       | A | 0.117 | p.G945D      |
| 8184 | <i>C15orf39</i> | 56905     | 15 | 75499861  | Missense     | G       | A | 0.068 | p.G491D      |
| 8184 | <i>C17orf75</i> | 64149     | 17 | 30668290  | Nonsense     | G       | A | 0.353 | p.R52X       |
| 8184 | <i>C17orf96</i> | 100170841 | 17 | 36830562  | Missense     | G       | C | 0.13  | p.L63V       |
| 8184 | <i>C17orf97</i> | 400566    | 17 | 260299    | Missense     | G       | A | 0.071 | p.E56K       |
| 8184 | <i>C5orf64</i>  | 285668    | 5  | 60982841  | Missense     | G       | A | 0.053 | p.A57T       |
| 8184 | <i>C6orf106</i> | 64771     | 6  | 34622443  | Missense     | G       | A | 0.097 | p.P91L       |
| 8184 | <i>C6orf58</i>  | 352999    | 6  | 127902333 | Missense     | C       | A | 0.32  | p.Q194K      |
| 8184 | <i>CABYR</i>    | 26256     | 18 | 21735686  | Missense     | C       | T | 0.098 | p.T74M       |
| 8184 | <i>CAMK2D</i>   | 817       | 4  | 114381329 | Missense     | T       | C | 0.095 | p.D404G      |
| 8184 | <i>CAPRIN2</i>  | 65981     | 12 | 30883198  | Missense     | G       | T | 0.342 | p.A360D      |
| 8184 | <i>CAPRIN2</i>  | 65981     | 12 | 30881809  | Missense     | T       | C | 0.047 | p.M519V      |
| 8184 | <i>CASD1</i>    | 64921     | 7  | 94174854  | Splice_Site  | T       | C | 0.085 | c.1477-3T>C  |
| 8184 | <i>CASP9</i>    | 842       | 1  | 15832543  | Missense     | T       | C | 0.061 | p.Q138R      |
| 8184 | <i>CC2D2A</i>   | 57545     | 4  | 15518357  | Missense     | A       | C | 0.125 | p.E376A      |
| 8184 | <i>CCDC102B</i> | 79839     | 18 | 66513615  | Missense     | A       | G | 0.079 | p.K298R      |
| 8184 | <i>CCDC170</i>  | 80129     | 6  | 151939181 | Missense     | G       | A | 0.047 | p.V683I      |
| 8184 | <i>CCHCR1</i>   | 54535     | 6  | 31111148  | Missense     | T       | A | 0.053 | p.K648M      |
| 8184 | <i>CCHCR1</i>   | 54535     | 6  | 31111125  | Missense     | G       | A | 0.047 | p.R656C      |
| 8184 | <i>CD93</i>     | 22918     | 20 | 23065638  | Nonsense     | G       | A | 0.294 | p.Q398X      |
| 8184 | <i>CEBPZ</i>    | 10153     | 2  | 37458668  | Missense     | G       | A | 0.033 | p.P15S       |
| 8184 | <i>CHTF18</i>   | 63922     | 16 | 840378    | Missense     | A       | G | 0.047 | p.K244R      |
| 8184 | <i>COL1A1</i>   | 1277      | 17 | 48271809  | Splice_Site  | C       | G | 0.289 | c.1516-1G>C  |
| 8184 | <i>COL24A1</i>  | 255631    | 1  | 86591837  | Missense     | G       | A | 0.075 | p.A61V       |
| 8184 | <i>COL4A4</i>   | 1286      | 2  | 227915832 | Missense     | G       | A | 0.07  | p.P1004L     |
| 8184 | <i>CPA6</i>     | 57094     | 8  | 68421768  | Missense     | G       | C | 0.2   | p.S173C      |
| 8184 | <i>CPN2</i>     | 1370      | 3  | 194063152 | Missense     | C       | T | 0.3   | p.G94R       |
| 8184 | <i>CSMD2</i>    | 114784    | 1  | 34090751  | Missense     | T       | A | 0.032 | p.E1760D     |
| 8184 | <i>CSNK2A3</i>  | 283106    | 11 | 11374269  | Missense     | A       | G | 0.064 | p.I133T      |
| 8184 | <i>CTCFL</i>    | 140690    | 20 | 56098205  | Missense     | C       | T | 0.407 | p.E225K      |
| 8184 | <i>CTNND2</i>   | 1501      | 5  | 11110976  | Missense     | T       | G | 0.33  | p.Q819H      |
| 8184 | <i>CTNS</i>     | 1497      | 17 | 3563963   | Missense     | C       | G | 0.036 | p.P380A      |
| 8184 | <i>CYB5R1</i>   | 51706     | 1  | 202935911 | Missense     | T       | C | 0.035 | p.N44S       |
| 8184 | <i>CYP11B1</i>  | 1584      | 8  | 143961102 | Missense     | C       | T | 0.062 | p.R43Q       |
| 8184 | <i>CYP1B1</i>   | 1545      | 2  | 38302177  | Missense     | C       | A | 0.054 | p.A119S      |
| 8184 | <i>CYP4B1</i>   | 1580      | 1  | 47282772  | Missense     | C       | T | 0.055 | p.R376C      |
| 8184 | <i>DBI</i>      | 1622      | 2  | 120125053 | Nonsense     | C       | G | 0.057 | p.Y28X       |
| 8184 | <i>DBI</i>      | 1622      | 2  | 120125058 | Missense     | C       | T | 0.056 | p.A30V       |
| 8184 | <i>DNAH17</i>   | 8632      | 17 | 76449472  | Missense     | G       | C | 0.238 | p.D3494E     |
| 8184 | <i>DNAH5</i>    | 1767      | 5  | 13913926  | Missense     | T       | C | 0.235 | p.T488A      |
| 8184 | <i>DNAJB4</i>   | 11080     | 1  | 78478739  | Missense     | G       | T | 0.281 | p.L72F       |
| 8184 | <i>DSPP</i>     | 1834      | 4  | 88534065  | Missense     | G       | A | 0.083 | p.D243N      |
| 8184 | <i>DYNC2L1I</i> | 51626     | 2  | 44021826  | Missense     | T       | A | 0.064 | p.F184Y      |
| 8184 | <i>EDNRB</i>    | 1910      | 13 | 78472390  | Missense     | G       | A | 0.237 | p.A515V      |
| 8184 | <i>ERCC6L2</i>  | 375748    | 9  | 98683569  | Missense     | G       | T | 0.214 | p.G435V      |
| 8184 | <i>ESPNL</i>    | 339768    | 2  | 239039841 | Missense     | A       | G | 0.053 | p.Q829R      |
| 8184 | <i>EXOC2</i>    | 55770     | 6  | 656343    | Missense     | T       | C | 0.035 | p.Q201R      |
| 8184 | <i>FI3A1</i>    | 2162      | 6  | 6174866   | Missense     | G       | A | 0.06  | p.P565L      |
| 8184 | <i>FAM129C</i>  | 199786    | 19 | 17660300  | Missense     | G       | A | 0.062 | p.G603S      |
| 8184 | <i>FAM178B</i>  | 51252     | 2  | 97637905  | Missense     | T       | C | 0.044 | p.I99M       |
| 8184 | <i>FAM198A</i>  | 729085    | 3  | 43095101  | Missense     | A       | G | 0.056 | p.Q460R      |
| 8184 | <i>FAM221B</i>  | 392307    | 9  | 35826038  | Missense     | T       | C | 0.05  | p.K41E       |
| 8184 | <i>FASN</i>     | 2194      | 17 | 80037030  | Missense     | G       | A | 0.057 | p.R2509W     |
| 8184 | <i>FLG</i>      | 2312      | 1  | 152280782 | Missense     | A       | G | 0.054 | p.Y2194H     |
| 8184 | <i>FLG</i>      | 2312      | 1  | 152281690 | Missense     | C       | T | 0.036 | p.R1891Q     |

|      |                   |           |    |           |              |      |   |       |                |
|------|-------------------|-----------|----|-----------|--------------|------|---|-------|----------------|
| 8184 | <i>FNI</i>        | 2335      | 2  | 216241226 | Missense     | A    | G | 0.263 | p.I1961T       |
| 8184 | <i>FNDC3B</i>     | 64778     | 3  | 171969109 | Missense     | C    | G | 0.224 | p.P190A        |
| 8184 | <i>FOXA1</i>      | 3169      | 14 | 38061604  | Missense     | G    | T | 0.28  | p.P129T        |
| 8184 | <i>FOXRED2</i>    | 80020     | 22 | 36900271  | Missense     | T    | C | 0.031 | p.N308S        |
| 8184 | <i>FRASI</i>      | 80144     | 4  | 79300993  | Missense     | G    | A | 0.062 | p.E1136K       |
| 8184 | <i>GDF15</i>      | 9518      | 19 | 18499422  | Missense     | C    | G | 0.05  | p.H202D        |
| 8184 | <i>GLDN</i>       | 342035    | 15 | 51689772  | Missense     | G    | A | 0.111 | p.S265N        |
| 8184 | <i>GLI2</i>       | 2736      | 2  | 121747406 | Missense     | G    | A | 0.076 | p.D1306N       |
| 8184 | <i>GNRH2</i>      | 2797      | 20 | 3025107   | Missense     | C    | T | 0.04  | p.A16V         |
| 8184 | <i>HDHD1</i>      | 8226      | X  | 6975782   | Missense     | C    | G | 0.049 | p.C198S        |
| 8184 | <i>HIVEP1</i>     | 3096      | 6  | 12120588  | Missense     | C    | T | 0.054 | p.T187M        |
| 8184 | <i>HLA-A</i>      | 3105      | 6  | 29910692  | Nonsense     | C    | T | 0.3   | p.Q78X         |
| 8184 | <i>HLA-DQB1</i>   | 3119      | 6  | 32632598  | Missense     | A    | T | 1     | p.F119Y        |
| 8184 | <i>ICT1</i>       | 3396      | 17 | 73008804  | Missense     | G    | C | 0.088 | p.R8P          |
| 8184 | <i>IGSF21</i>     | 84966     | 1  | 18704773  | Missense     | C    | T | 0.064 | p.R453W        |
| 8184 | <i>IL2RB</i>      | 3560      | 22 | 37524619  | Missense     | G    | T | 0.049 | p.D391E        |
| 8184 | <i>INPP5B</i>     | 3633      | 1  | 38397369  | Missense     | C    | T | 0.034 | p.G6S          |
| 8184 | <i>INPP5F</i>     | 22876     | 10 | 121586882 | Missense     | A    | G | 0.05  | p.N997D        |
| 8184 | <i>KAT6B</i>      | 23522     | 10 | 76781905  | In_Frame_Del | GGAA | G | 0.119 | p.1097_1097del |
| 8184 | <i>KBTD12</i>     | 166348    | 3  | 127641968 | Missense     | C    | A | 0.048 | p.Q22K         |
| 8184 | <i>KIAA1211</i>   | 57482     | 4  | 57181995  | Missense     | C    | T | 0.08  | p.S776L        |
| 8184 | <i>KIF4B</i>      | 285643    | 5  | 154395458 | Missense     | G    | A | 0.043 | p.R680H        |
| 8184 | <i>KMT2D</i>      | 8085      | 12 | 49437567  | Splice_Site  | T    | A | 0.284 | c.5320-2A>T    |
| 8184 | <i>KRTAP4-7</i>   | 100132476 | 17 | 39240819  | Missense     | C    | G | 0.111 | p.L121V        |
| 8184 | <i>KRTAP9-1</i>   | 728318    | 17 | 39346518  | Missense     | T    | C | 0.036 | p.I127T        |
| 8184 | <i>LANCL2</i>     | 55915     | 7  | 55433884  | Missense     | A    | C | 0.051 | p.T56P         |
| 8184 | <i>OC10099669</i> | 100996693 | 2  | 220361598 | Missense     | A    | G | 0.247 | p.I66V         |
| 8184 | <i>LOC400794</i>  | 400794    | 1  | 165513659 | Missense     | G    | T | 0.265 | p.K42N         |
| 8184 | <i>LOC401052</i>  | 401052    | 3  | 10049098  | Missense     | T    | G | 0.636 | p.H96P         |
| 8184 | <i>LRGUK</i>      | 136332    | 7  | 133848257 | Missense     | G    | T | 0.079 | p.D302Y        |
| 8184 | <i>LRP1</i>       | 4035      | 12 | 57577973  | Missense     | C    | T | 0.219 | p.A2012V       |
| 8184 | <i>LRP1B</i>      | 53353     | 2  | 141114025 | Nonsense     | C    | A | 0.333 | p.E3806X       |
| 8184 | <i>LRRC2</i>      | 79442     | 3  | 46580591  | Missense     | G    | T | 0.081 | p.A145E        |
| 8184 | <i>MAGEA11</i>    | 4110      | X  | 148797410 | Splice_Site  | C    | T | 0.22  | c.267-3C>T     |
| 8184 | <i>MFSD1</i>      | 64747     | 3  | 158520011 | Missense     | C    | T | 0.067 | p.P73S         |
| 8184 | <i>MFSD6L</i>     | 162387    | 17 | 8701799   | Missense     | G    | T | 0.072 | p.P214T        |
| 8184 | <i>MGAT1</i>      | 4245      | 5  | 180219304 | Missense     | C    | T | 0.036 | p.R223Q        |
| 8184 | <i>MICAL2</i>     | 9645      | 11 | 12265546  | Missense     | T    | C | 0.282 | p.S891P        |
| 8184 | <i>MINK1</i>      | 50488     | 17 | 4797305   | Missense     | G    | A | 0.044 | p.V834I        |
| 8184 | <i>MKNK2</i>      | 2872      | 19 | 2050823   | Missense     | G    | T | 0.078 | p.Q10K         |
| 8184 | <i>MLXIP</i>      | 22877     | 12 | 122626247 | Missense     | G    | T | 0.321 | p.S883I        |
| 8184 | <i>MMAA</i>       | 166785    | 4  | 146576418 | Missense     | G    | C | 0.042 | p.Q363H        |
| 8184 | <i>MSLN</i>       | 10232     | 16 | 818559    | Missense     | A    | G | 0.099 | p.M593V        |
| 8184 | <i>MUC22</i>      | 100507679 | 6  | 30993776  | Missense     | A    | T | 0.035 | p.T190S        |
| 8184 | <i>MUC7</i>       | 4589      | 4  | 71347171  | Missense     | C    | T | 0.488 | p.A237V        |
| 8184 | <i>MYLK</i>       | 4638      | 3  | 123419733 | Missense     | A    | G | 0.048 | p.L861P        |
| 8184 | <i>N4BP2</i>      | 55728     | 4  | 40138676  | Missense     | A    | G | 0.111 | p.T1587A       |
| 8184 | <i>NAV2</i>       | 89797     | 11 | 20066751  | Nonsense     | C    | A | 0.256 | p.S1169X       |
| 8184 | <i>NCKAP5</i>     | 344148    | 2  | 133541454 | Missense     | A    | G | 0.091 | p.I977T        |
| 8184 | <i>NCKAP5</i>     | 344148    | 2  | 133541575 | Missense     | C    | T | 0.041 | p.V937I        |
| 8184 | <i>NCOA7</i>      | 135112    | 6  | 126210395 | Missense     | T    | G | 0.042 | p.S399A        |
| 8184 | <i>NHLRC2</i>     | 374354    | 10 | 115644040 | Missense     | G    | A | 0.074 | p.V314I        |
| 8184 | <i>NMS</i>        | 129521    | 2  | 101095857 | Missense     | G    | A | 0.115 | p.A102T        |
| 8184 | <i>NOL4</i>       | 8715      | 18 | 31537357  | Missense     | C    | A | 0.3   | p.R454L        |
| 8184 | <i>NOL8</i>       | 55035     | 9  | 95061229  | Missense     | A    | G | 0.122 | p.S1036P       |
| 8184 | <i>NPR3</i>       | 4883      | 5  | 32786389  | Missense     | A    | G | 0.091 | p.N305D        |
| 8184 | <i>NPTX1</i>      | 4884      | 17 | 78449948  | Missense     | C    | T | 0.055 | p.G100D        |
| 8184 | <i>NRXN1</i>      | 9378      | 2  | 50699451  | Missense     | C    | T | 0.204 | p.E1117K       |
| 8184 | <i>NWD1</i>       | 284434    | 19 | 16855265  | Missense     | A    | G | 0.059 | p.I78V         |
| 8184 | <i>OR10A5</i>     | 144124    | 11 | 6867707   | Nonsense     | C    | A | 0.25  | p.S265X        |
| 8184 | <i>OR10A6</i>     | 390093    | 11 | 7949791   | Missense     | A    | C | 0.179 | p.V140G        |
| 8184 | <i>OR10A6</i>     | 390093    | 11 | 7949860   | Missense     | G    | A | 0.156 | p.A117V        |
| 8184 | <i>OR10G2</i>     | 26534     | 14 | 22102374  | Missense     | T    | C | 0.12  | p.R209G        |
| 8184 | <i>OR10G4</i>     | 390264    | 11 | 123886865 | Missense     | T    | A | 0.333 | p.V195E        |
| 8184 | <i>OR10W1</i>     | 81341     | 11 | 58034543  | Missense     | C    | T | 0.038 | p.R263Q        |
| 8184 | <i>OR1N2</i>      | 138882    | 9  | 125315557 | Missense     | T    | C | 0.043 | p.W37R         |
| 8184 | <i>OR2A14</i>     | 135941    | 7  | 143826573 | Missense     | C    | T | 0.047 | p.A123V        |
| 8184 | <i>OR4C6</i>      | 219432    | 11 | 55433305  | Nonsense     | C    | A | 0.314 | p.C221X        |
| 8184 | <i>OR51B5</i>     | 282763    | 11 | 5364276   | Missense     | G    | A | 0.15  | p.P160L        |
| 8184 | <i>OR52E6</i>     | 390078    | 11 | 5862731   | Missense     | A    | G | 0.044 | p.W133R        |
| 8184 | <i>OR6TI</i>      | 219874    | 11 | 123814356 | Missense     | G    | A | 0.042 | p.R64W         |
| 8184 | <i>OVGP1</i>      | 5016      | 1  | 111957311 | Missense     | G    | C | 0.058 | p.H604Q        |
| 8184 | <i>PAG1</i>       | 55824     | 8  | 81888870  | Missense     | C    | T | 0.21  | p.G403E        |
| 8184 | <i>PAK2</i>       | 5062      | 3  | 196509577 | Missense     | C    | G | 0.083 | p.S20R         |
| 8184 | <i>PCDHA1</i>     | 56147     | 5  | 140174865 | Missense     | G    | C | 0.076 | p.V106L        |
| 8184 | <i>PCDHA1</i>     | 56147     | 5  | 140183058 | Missense     | G    | A | 0.057 | p.C759Y        |
| 8184 | <i>PCDHA1</i>     | 56147     | 5  | 140168070 | Missense     | A    | G | 0.046 | p.Y732C        |
| 8184 | <i>PCDHA3</i>     | 56145     | 5  | 140181734 | Missense     | A    | G | 0.1   | p.I318V        |
| 8184 | <i>PCDHA3</i>     | 56145     | 5  | 140186937 | Missense     | G    | T | 0.051 | p.E55D         |
| 8184 | <i>PCDHA5</i>     | 56143     | 5  | 140222641 | Missense     | A    | G | 0.071 | p.K579E        |

|      |                     |        |    |           |                 |    |   |       |             |
|------|---------------------|--------|----|-----------|-----------------|----|---|-------|-------------|
| 8184 | <i>PCDHB4</i>       | 56131  | 5  | 140502997 | Missense        | A  | C | 0.094 | p.S473R     |
| 8184 | <i>PCNT</i>         | 5116   | 21 | 47786524  | Missense        | A  | G | 0.047 | p.T879A     |
| 8184 | <i>PCNXL2</i>       | 80003  | 1  | 233122091 | Missense        | G  | A | 0.2   | p.S1996F    |
| 8184 | <i>PDE1C</i>        | 5137   | 7  | 31917651  | Splice_Site     | T  | C | 0.458 | c.426-2A>G  |
| 8184 | <i>PDXDC1</i>       | 23042  | 16 | 15111218  | Missense        | C  | T | 0.037 | p.P301L     |
| 8184 | <i>PEAR1</i>        | 375033 | 1  | 156883493 | Missense        | G  | A | 0.107 | p.R885H     |
| 8184 | <i>PEAR1</i>        | 375033 | 1  | 156883546 | Missense        | A  | G | 0.09  | p.N903D     |
| 8184 | <i>PLEKHA6</i>      | 22874  | 1  | 204237416 | Missense        | C  | T | 0.049 | p.V43I      |
| 8184 | <i>PMS2</i>         | 5395   | 7  | 6026988   | Missense        | G  | A | 0.065 | p.P470S     |
| 8184 | <i>PPAN-P2RY11</i>  | 692312 | 19 | 10224548  | Missense        | G  | A | 0.048 | p.A507T     |
| 8184 | <i>PRB4</i>         | 5545   | 12 | 11461706  | Missense        | G  | T | 0.143 | p.P71T      |
| 8184 | <i>PRDM2</i>        | 7799   | 1  | 14105139  | Missense        | T  | A | 0.065 | p.D283E     |
| 8184 | <i>PRHI</i>         | 5554   | 12 | 11214145  | Nonsense        | C  | T | 0.046 | p.W250X     |
| 8184 | <i>PRR5</i>         | 55615  | 22 | 45075738  | Missense        | T  | C | 0.069 | p.M20T      |
| 8184 | <i>PTPRN2</i>       | 5799   | 7  | 157931144 | Missense        | C  | T | 0.036 | p.S325N     |
| 8184 | <i>PTPRS</i>        | 5802   | 19 | 5244392   | Missense        | C  | T | 0.269 | p.V364I     |
| 8184 | <i>PTPRZ1</i>       | 5803   | 7  | 121681026 | Missense        | C  | A | 0.2   | p.H1932N    |
| 8184 | <i>RASAL2</i>       | 9462   | 1  | 178423608 | Missense        | C  | A | 0.222 | p.A679E     |
| 8184 | <i>RBBP6</i>        | 5930   | 16 | 24567014  | Missense        | G  | A | 0.18  | p.D143N     |
| 8184 | <i>RBMXL3</i>       | 139804 | X  | 114425400 | Missense        | G  | A | 0.039 | p.G466R     |
| 8184 | <i>REST</i>         | 5978   | 4  | 57796900  | Missense        | G  | A | 0.062 | p.V626I     |
| 8184 | <i>REV3L</i>        | 5980   | 6  | 111632393 | Nonsense        | G  | A | 0.419 | p.R2814X    |
| 8184 | <i>RNU5D-1</i>      | 26830  | 5  | 80738539  | Missense        | G  | A | 0.167 | p.S261L     |
| 8184 | <i>RTP4</i>         | 64108  | 3  | 187088812 | Missense        | C  | T | 0.042 | p.T131M     |
| 8184 | <i>RTP5</i>         | 285093 | 2  | 242814009 | Missense        | G  | A | 0.039 | p.G101E     |
| 8184 | <i>SETD2</i>        | 29072  | 3  | 47125385  | Missense        | G  | A | 0.042 | p.P1962L    |
| 8184 | <i>SETX</i>         | 23064  | 9  | 135205006 | Missense        | G  | C | 0.058 | p.A660G     |
| 8184 | <i>SH3BP4</i>       | 23677  | 2  | 235949877 | Missense        | T  | C | 0.043 | p.M155T     |
| 8184 | <i>SH3TC2</i>       | 79628  | 5  | 148406199 | Missense        | G  | A | 0.191 | p.R997W     |
| 8184 | <i>SIPA1L1</i>      | 26037  | 14 | 72117205  | Missense        | C  | G | 0.227 | p.R658G     |
| 8184 | <i>SIX5</i>         | 147912 | 19 | 46268902  | Missense        | C  | T | 0.042 | p.V693M     |
| 8184 | <i>SLC15A2</i>      | 6565   | 3  | 121643804 | Missense        | C  | T | 0.051 | p.L350F     |
| 8184 | <i>SLC3A1</i>       | 6519   | 2  | 44508607  | Frame_Shift_Del | GA | G | 0.348 | p.G231fs    |
| 8184 | <i>SLC52A3</i>      | 113278 | 20 | 744415    | Missense        | G  | A | 0.036 | p.P267L     |
| 8184 | <i>SLC5A8</i>       | 160728 | 12 | 101560321 | Missense        | T  | C | 0.281 | p.T493A     |
| 8184 | <i>SLC6A16</i>      | 28968  | 19 | 49794028  | Splice_Site     | G  | T | 0.188 | c.1779-4C>A |
| 8184 | <i>SLFN12</i>       | 55106  | 17 | 33749168  | Missense        | C  | T | 0.211 | p.D294N     |
| 8184 | <i>SLIT3</i>        | 6586   | 5  | 168180081 | Missense        | C  | T | 0.042 | p.G618S     |
| 8184 | <i>SPDYE2</i>       | 441273 | 7  | 102194965 | Missense        | A  | G | 0.115 | p.K107R     |
| 8184 | <i>SPEF2</i>        | 79925  | 5  | 35692775  | Missense        | T  | A | 0.082 | p.N616K     |
| 8184 | <i>SPEG</i>         | 10290  | 2  | 220350190 | Missense        | A  | T | 0.26  | p.S2578C    |
| 8184 | <i>STAP2</i>        | 55620  | 19 | 4327352   | Missense        | C  | A | 0.226 | p.K207N     |
| 8184 | <i>TGON1-GTF2A1</i> | 286749 | 2  | 48848003  | Missense        | G  | T | 0.167 | p.R716I     |
| 8184 | <i>STRN3</i>        | 29966  | 14 | 31381351  | Missense        | T  | C | 0.069 | p.N471S     |
| 8184 | <i>SUPT20H</i>      | 55578  | 13 | 37583831  | Missense        | G  | A | 0.088 | p.T773M     |
| 8184 | <i>SYNE2</i>        | 23224  | 14 | 64519455  | Missense        | A  | G | 0.06  | p.I2942V    |
| 8184 | <i>SYT8</i>         | 90019  | 11 | 1858262   | Missense        | C  | T | 0.034 | p.T303M     |
| 8184 | <i>TAF1B</i>        | 9014   | 2  | 10059770  | Missense        | G  | T | 0.086 | p.E462D     |
| 8184 | <i>TAOK3</i>        | 51347  | 12 | 118682751 | Missense        | C  | T | 0.064 | p.S47N      |
| 8184 | <i>TBC1D1</i>       | 23216  | 4  | 37903756  | Missense        | T  | C | 0.043 | p.S14P      |
| 8184 | <i>TELO2</i>        | 9894   | 16 | 1555589   | Missense        | A  | G | 0.081 | p.Q674R     |
| 8184 | <i>TEP1</i>         | 7011   | 14 | 20872881  | Missense        | G  | T | 0.079 | p.N307K     |
| 8184 | <i>TET2</i>         | 54790  | 4  | 106197207 | Nonsense        | G  | A | 0.628 | p.W1847X    |
| 8184 | <i>TIMM44</i>       | 10469  | 19 | 7999089   | Missense        | C  | T | 0.295 | p.R143Q     |
| 8184 | <i>TLI1</i>         | 7092   | 4  | 166996054 | Missense        | A  | T | 0.329 | p.N738I     |
| 8184 | <i>TMCO6</i>        | 55374  | 5  | 140023238 | Missense        | C  | G | 0.042 | p.T299S     |
| 8184 | <i>TMEM128</i>      | 85013  | 4  | 4249884   | Missense        | G  | T | 0.094 | p.L16I      |
| 8184 | <i>TMEM14B</i>      | 81853  | 6  | 10756728  | Missense        | C  | T | 0.122 | p.R108C     |
| 8184 | <i>TMEM156</i>      | 80008  | 4  | 39000305  | Missense        | A  | G | 0.119 | p.S105P     |
| 8184 | <i>TMEM177</i>      | 80775  | 2  | 120438523 | Missense        | A  | G | 0.043 | p.I32V      |
| 8184 | <i>TMEM8A</i>       | 58986  | 16 | 426432    | Missense        | T  | C | 0.053 | p.I310V     |
| 8184 | <i>TMPRSS6</i>      | 164656 | 22 | 37462936  | Missense        | A  | G | 0.043 | p.V749A     |
| 8184 | <i>TMPRSS9</i>      | 360200 | 19 | 2422177   | Missense        | G  | A | 0.049 | p.S793N     |
| 8184 | <i>TNFRSF11B</i>    | 4982   | 8  | 119945444 | Missense        | G  | T | 0.266 | p.D42E      |
| 8184 | <i>TNS1</i>         | 7145   | 2  | 218674697 | Missense        | C  | T | 0.079 | p.V1604I    |
| 8184 | <i>TOP2A</i>        | 7153   | 17 | 38572683  | Nonsense        | C  | A | 0.312 | p.E87X      |
| 8184 | <i>TSKU</i>         | 25987  | 11 | 76507582  | Missense        | G  | A | 0.037 | p.V308I     |
| 8184 | <i>TTC16</i>        | 158248 | 9  | 130489743 | Missense        | A  | G | 0.125 | p.E588G     |
| 8184 | <i>TTF1</i>         | 7270   | 9  | 135277130 | Missense        | C  | A | 0.043 | p.G360V     |
| 8184 | <i>TUBA3D</i>       | 113457 | 2  | 132237927 | Missense        | C  | A | 0.333 | p.R221S     |
| 8184 | <i>UBR4</i>         | 23352  | 1  | 19510394  | Splice_Site     | A  | G | 0.096 | c.2099-4T>C |
| 8184 | <i>UCK2</i>         | 7371   | 1  | 165859601 | Splice_Site     | G  | A | 0.2   | c.259+1G>A  |
| 8184 | <i>UNC13B</i>       | 10497  | 9  | 35228038  | Missense        | C  | T | 0.273 | p.P17S      |
| 8184 | <i>UNC13D</i>       | 201294 | 17 | 73832495  | Missense        | C  | T | 0.283 | p.M438I     |
| 8184 | <i>UNC80</i>        | 285175 | 2  | 210824272 | Missense        | G  | A | 0.222 | p.R2478Q    |
| 8184 | <i>UVSSA</i>        | 57654  | 4  | 1349029   | Missense        | G  | A | 0.082 | p.R391H     |
| 8184 | <i>VN1R4</i>        | 317703 | 19 | 53770563  | Missense        | A  | C | 0.116 | p.L119R     |
| 8184 | <i>VPS13D</i>       | 55187  | 1  | 12302641  | Missense        | A  | C | 0.214 | p.K57Q      |
| 8184 | <i>WBSCR27</i>      | 155368 | 7  | 73249165  | Missense        | T  | A | 0.061 | p.R216W     |
| 8184 | <i>WBSCR28</i>      | 135886 | 7  | 73279482  | Missense        | T  | C | 0.053 | p.W78R      |

|      |                |        |    |           |          |   |   |       |         |
|------|----------------|--------|----|-----------|----------|---|---|-------|---------|
| 8184 | <i>WDR49</i>   | 151790 | 3  | 167217964 | Missense | A | G | 0.25  | p.L651P |
| 8184 | <i>WDR91</i>   | 29062  | 7  | 134889141 | Missense | G | A | 0.042 | p.P257L |
| 8184 | <i>WRAP53</i>  | 55135  | 17 | 7606722   | Missense | C | G | 0.035 | p.A522G |
| 8184 | <i>ZNF239</i>  | 8187   | 10 | 44052630  | Missense | A | G | 0.212 | p.F300L |
| 8184 | <i>ZNF428</i>  | 126299 | 19 | 44118191  | Missense | G | A | 0.043 | p.D640N |
| 8184 | <i>ZNF614</i>  | 80110  | 19 | 52519608  | Missense | C | T | 0.049 | p.V415I |
| 8184 | <i>ZNF804A</i> | 91752  | 2  | 185800905 | Missense | A | T | 0.067 | p.Q261L |
| 8184 | <i>ZNF813</i>  | 126017 | 19 | 53993994  | Missense | G | A | 0.073 | p.D170N |

\*Based on NCBI human reference genome GRC Build 37 (hg19).

Supplementary Table 4. Validated somatic mutations in the discovery cohort by Sanger sequencing.

| No. | Hugo Symbol     | Entrez Gene Id | Chromosome | Start position* | End Position* | Nucleotide change            | Forward primer            | Reverse primer          | Validation |
|-----|-----------------|----------------|------------|-----------------|---------------|------------------------------|---------------------------|-------------------------|------------|
| 1   | <i>ACCSL</i>    | 390110         | 11         | 44076778        | 44076778      | NM_001031854:exon9:c.A1076T  | CCCTCTGATGTACCACCCC       | CCTGTGGTTCTCGTCCCA      | YES        |
| 2   | <i>ANK3</i>     | 288            | 10         | 61846611        | 61846611      | NM_001149:exon8:c.A974C      | CAGCAGTGACTTAACCAAACCTG   | TCCTGCAAGCCAGTGCTATT    | YES        |
| 3   | <i>ANKRD22</i>  | 118932         | 10         | 90591731        | 90591731      | NM_144590:exon2:c.T74G       | AACGATTCTCATATGCCCTCG     | CCTGCTTTTGTTTTCCCGACC   | YES        |
| 4   | <i>ARHGAP29</i> | 9411           | 1          | 94652126        | 94652126      | NM_004815:exon16:c.C1709T    | TCCCTGTTACCCAGAGTATGAGA   | AGTGCTACTGATTGAGCTGGT   | YES        |
| 5   | <i>ATP6V0A2</i> | 23545          | 12         | 124203252       | 124203252     | NM_012463:exon2:c.196+4A>G   | ACAAGAGTGTACATCCCCCAA     | GGGTAACAACAAAATAACCAGGC | YES        |
| 6   | <i>ATRX</i>     | 546            | X          | 76953110        | 76953110      | NM_000489:exon4:c.C203T      | CAGTGTATCCCCGCAGCAT       | GTGACGATCCTGAAGACTTGGA  | YES        |
| 7   | <i>BNIP3</i>    | 664            | 10         | 133787327       | 133787327     | NM_004052:exon2:c.G167A      | GCCCCACTGTCCTAGAGGTGA     | GAGGGATGGTTCCTGGTGTG    | YES        |
| 8   | <i>BVES-AS1</i> | 154442         | 6          | 105606539       | 105606539     | NM_022361:exon4:c.T682C      | TTGTGTCAGGGGTGATCTGC      | GTCAGTGGGCTTTTCAACCT    | YES        |
| 9   | <i>CI7orf58</i> | 284018         | 17         | 65989064        | 65989064      | NM_181656:exon2:c.T199C      | CTGGCAATGGTGTGGTTCG       | CAGCTGCAATAAGCCGTGTC    | YES        |
| 10  | <i>CCDC102B</i> | 79839          | 18         | 66504349        | 66504349      | NM_024781:exon2:c.A349T      | TTTGTCACTTCCTTCTCTCCC     | AAAAGACCATGCGGTGGTGG    | YES        |
| 11  | <i>CCDC129</i>  | 223075         | 7          | 31682417        | 31682417      | NM_194300:exon10:c.A1433G    | GCCACCCAAACCTCACTCAC      | CAAGGCATTCGCTTCTTGGC    | YES        |
| 12  | <i>CCDC73</i>   | 493860         | 11         | 32676427        | 32676427      | NM_001008391:exon10:c.A737G  | CCTGATCCACAACCGCAGAT      | TGCAAAGGCGGAGTATTTTGT   | YES        |
| 13  | <i>CCDC90B</i>  | 60492          | 11         | 82984731        | 82984731      | NM_001286120:exon5:c.G208T   | GAAACCAGTCGAATCAGAGCAG    | TGAGGAAGCCAGAGACTCTACA  | YES        |
| 14  | <i>CNST</i>     | 163882         | 1          | 246784733       | 246784733     | NM_001139459:exon3:c.C382A   | TAGCCATTAGCTCTGGCATCTG    | TCCAAACTGCTAGGGGAAT     | YES        |
| 15  | <i>CNTROB</i>   | 116840         | 17         | 7838452         | 7838452       | NM_001037144:exon4:c.A583C   | TGCCCCCTTACTCCTTCAG       | TTTCAACTTGGGTCCCCT      | YES        |
| 16  | <i>CXorf67</i>  | 340602         | X          | 51150445        | 51150445      | NM_203407:exon1:c.A577C      | AAGATCCTGCTGCTCCGTC       | AGATGCGTGGCTTAGGAGTG    | YES        |
| 17  | <i>DDX3X</i>    | 1654           | X          | 41204711        | 41204711      | NM_001193417:exon11:c.G1177A | ACCCAGCCAAATGGGTAT        | GGTGTCCGCCACACTATGAT    | YES        |
| 18  | <i>DGAT2L6</i>  | 347516         | X          | 69419150        | 69419150      | NM_198512:exon2:c.T115G      | CCAGCCCAATGTGCTCTTCT      | GCCCCTGTCTTACCTTGAC     | YES        |
| 19  | <i>DHX8</i>     | 1659           | 17         | 41570872        | 41570872      | NM_001302623:exon7:c.A923G   | AGTTATCCCAGGCCATCGTG      | CAGATGTGTCTGGCTCTCCC    | YES        |
| 20  | <i>DMD</i>      | 1756           | X          | 32632562        | 32632562      | NM_000109:exon12:c.G1316A    | TCCCATCAACCATGTCATCTGT    | TAGATGCCCCAAATGCGAA     | YES        |
| 21  | <i>DMXL2</i>    | 23312          | 15         | 51772183        | 51772183      | NM_001174117:exon23:c.A4810G | TCATGAGTGAGAAAGGTAGCACTI  | TCCACTACCACTGCCTACCA    | YES        |
| 22  | <i>DNAH5</i>    | 1767           | 5          | 13727663        | 13727663      | NM_001369:exon70:c.C11986T   | TTGGGTGGCATGACACAGTT      | TGGACTTTTACCTGGCGGAT    | YES        |
| 23  | <i>DPP9</i>     | 91039          | 19         | 4700246         | 4700246       | NM_139159:exon10:c.G1056T    | ATGTGCCTACAGACAGACCG      | CGCATTCTAGGCACAGGTCC    | YES        |
| 24  | <i>ENTHD2</i>   | 146705         | 17         | 79202760        | 79202760      | NM_144679:exon12:c.G1546C    | CCTGCAGCCTCTGAGTTCAA      | CCCTAGGGTCGCTCTCAA      | YES        |
| 25  | <i>FAM135A</i>  | 57579          | 6          | 71187020        | 71187020      | NM_001162529:exon6:c.A527C   | TTTAGCAAAGTACACGTTTTCACT  | GCTGCACTTTAGCCCCATA     | YES        |
| 26  | <i>FAM135A</i>  | 57579          | 6          | 71187020        | 71187020      | NM_001162529:exon6:c.A527C   | ICTTTAGCAAAGTACACGTTTTCAC | TGAAGCTGCACTTTAGCCCC    | YES        |
| 27  | <i>FAM205A</i>  | 259308         | 9          | 34725438        | 34725438      | NM_001141917:exon4:c.T1799C  | CTTGCCCTGGTGGATTGTGTC     | GTCCATCTCAGTGTACCA      | YES        |
| 28  | <i>FAM47C</i>   | 442444         | X          | 37026830        | 37026830      | NM_001013736:exon1:c.C347T   | CTAGCGACTAGAGCGTCAGG      | GTACATGGCCAAGGGATGCT    | NO         |
| 29  | <i>FNI</i>      | 2335           | 2          | 216241226       | 216241226     | NM_212474:exon34:c.T5339C    | TGAGCCAAGCAGGCACTAAT      | AGCCCGTTTACATTGTGGGTAT  | YES        |
| 30  | <i>GPR125</i>   | 166647         | 4          | 22475411        | 22475411      | NM_145290:exon2:c.A313G      | TAGCTGGGAATTTAGTCACAGATT  | ATCCGAGCTGAAGAATGGCTC   | YES        |
| 31  | <i>GUCY1B3</i>  | 2983           | 4          | 156696170       | 156696170     | NM_000857:exon3:c.A128T      | TGGCAGGTATTGTATTGAGCAGT   | CCACTTCTGTAACCCTGCGT    | YES        |
| 32  | <i>HCAR3</i>    | 8843           | 12         | 123200527       | 123200527     | NM_006018:exon1:c.A758G      | CACCGGAGTTGGCGATTAAC      | AGTTGTGATCCAGAATGGCAC   | YES        |
| 33  | <i>HSD3B1</i>   | 3283           | 1          | 120056673       | 120056673     | NM_000862:exon4:c.A527C      | TGGCTGTAGTACGACCAATCT     | AACTGTCTCGGATGCTTGG     | YES        |
| 34  | <i>IGSF3</i>    | 3321           | 1          | 117146423       | 117146423     | NM_001007237:exon6:c.G1447A  | ATGCCAGCGTCATCCTTGAG      | ACCGTCACTACCAAGAG       | YES        |

|    |                     |           |    |           |           |                               |                         |                          |     |
|----|---------------------|-----------|----|-----------|-----------|-------------------------------|-------------------------|--------------------------|-----|
| 35 | <i>IL17REL</i>      | 400935    | 22 | 50439514  | 50439514  | NM_001001694:exon4:c.C106A    | CAGTCTTCGGGACTTGGGTG    | CACAAAGCCTTCCGAGCAC      | YES |
| 36 | <i>IQCC</i>         | 55721     | 1  | 32671899  | 32671899  | NM_001160042:exon2:c.426+1G>T | GCCAACCTCTGGAGATACCG    | GCAGACAAGTTGGTGAGGGT     | YES |
| 37 | <i>ITIH3</i>        | 3699      | 3  | 52833448  | 52833448  | NM_002217:exon8:c.A850G       | CCCCTAGAGGGTGGGATAGG    | TGTGCCACTGGTGTGATTA      | YES |
| 38 | <i>JAKMIP2</i>      | 9832      | 5  | 147040551 | 147040551 | NM_001282282:exon2:c.C461T    | GGTGTGGTGACAGAACTCA     | ACTGTACTAACCAGCCTCCGA    | YES |
| 39 | <i>KANK1</i>        | 23189     | 9  | 740903    | 740903    | NM_153186:exon8:c.G3191A      | CATCCCTTCAGTGGCTTCGT    | CTGGTTACGGGTGCATTCCCT    | YES |
| 40 | <i>KCNMB2</i>       | 10242     | 3  | 178546013 | 178546013 | NM_001278911:exon4:c.C275T    | GCTGGCAAAGGGGAACTTCA    | TAGCTCTTGGGCCGTGTGTTT    | YES |
| 41 | <i>KLHL38</i>       | 340359    | 8  | 124659205 | 124659205 | NM_001081675:exon2:c.T1400C   | CGCTCTCTGGTTGGTTGGA     | TGAGTTCCTGGGGGTCACAA     | YES |
| 42 | <i>KRTAP9-8</i>     | 83901     | 17 | 39394482  | 39394482  | NM_031963:exon1:c.T179C       | TGATGATGAGACGGGCTTCCT   | TGGGGTGGTAGCAGGTTCT      | YES |
| 43 | <i>LINGO1</i>       | 84894     | 15 | 77907582  | 77907582  | NM_032808:exon2:c.C667T       | CTCAATGGTGCTGATGGGGT    | CTGAAGCTCATCCCCTAGG      | YES |
| 44 | <i>LOC100996693</i> | 100996693 | 2  | 220361598 | 220361598 | NM_001286811:exon2:c.A196G    | TCCTCTCCCTACCAAGCCA     | TAGGCCCAGAGGTAAACACG     | YES |
| 45 | <i>LOC101929057</i> | 101929057 | 6  | 90383952  | 90383952  | NM_014611:exon79:c.T13118C    | ACCGACGAGTTCCCTAGGTT    | AAGCCCATGCTTGTTTCAGAAAC  | YES |
| 46 | <i>LOC401052</i>    | 401052    | 3  | 10049098  | 10049098  | NM_001008737:exon4:c.A287C    | TGCACACCCTAGTTTAGGCG    | GGAActCCAGGACTGACCCT     | NO  |
| 47 | <i>LOC401052</i>    | 401052    | 3  | 10049098  | 10049098  | NM_001008737:exon4:c.A287C    | TGCACACCCTAGTTTAGGCG    | GGAActCCAGGACTGACCCT     | YES |
| 48 | <i>MACROD2</i>      | 140733    | 20 | 16025281  | 16025281  | NM_001033087:exon13:c.A592T   | ATCCTCTACCCCCACCAGTAAA  | CTGTGGGGACTTGGCAAAC      | YES |
| 49 | <i>MPO</i>          | 4353      | 17 | 56349062  | 56349062  | NM_000250:exon11:c.G1984A     | CTCCCTCCAGTCTTCAACTG    | TGATGGAGCAGTATGGCAG      | YES |
| 50 | <i>MYADM</i>        | 91663     | 19 | 54377469  | 54377469  | NM_001020818:exon2:c.C686G    | GCTATATGGCCACCCTACCC    | GGCACACACGTAGTAGGCAT     | YES |
| 51 | <i>NBEAL2</i>       | 23218     | 3  | 47037954  | 47037954  | NM_015175:exon16:c.A2345C     | CCTGACTTTAGCCACTGGGG    | AGTAGCACAGTCGAGCCAAC     | YES |
| 52 | <i>NHS</i>          | 4810      | X  | 17744510  | 17744510  | NM_001291868:exon6:c.T1690G   | AGATGCTTGGTCTTCCCTGC    | TACACCACCACCATGATGCC     | YES |
| 53 | <i>NHSL1</i>        | 57224     | 6  | 138794475 | 138794475 | NM_001144060:exon3:c.T307C    | CATACAActGAGTCCTTGGTCAT | ACTCTCAGGGACCCACCTTT     | YES |
| 54 | <i>OR2L13</i>       | 284521    | 1  | 248112794 | 248112794 | NM_001001963:exon1:c.G635C    | AGTCCTGAGACCTTAGGCAGAA  | TGTGATGTCCAGCAATGGT      | YES |
| 55 | <i>OR51A2</i>       | 401667    | 11 | 4976013   | 4976013   | NM_001004748:exon1:c.T931C    | TCATCAACCTGGCCGTTGTC    | ACCAGACATTTCCAGGTTTCTGT  | NO  |
| 56 | <i>OTOG</i>         | 340990    | 11 | 17618539  | 17618539  | NM_001277269:exon29:c.A3703C  | ACCATGGAGTTCTCGCTTCC    | GACAGACTGCCAGTACCCT      | NO  |
| 57 | <i>PCDHA8</i>       | 56140     | 5  | 140228918 | 140228918 | NM_014005:exon1:c.T838A       | AGAACGCCCTGCTCACTTAC    | GTTGGCATCTGCGTCTAGGT     | YES |
| 58 | <i>PGMI</i>         | 5236      | 1  | 64117428  | 64117428  | NM_001172818:exon9:c.A1423G   | AGGCCTTGGTGTGATCTGC     | GTCTCTCTCACTTACACACCG    | YES |
| 59 | <i>PLEKHS1</i>      | 79949     | 10 | 115534596 | 115534596 | NM_001193435:exon8:c.A527G    | CTCCCACAGAAAACCACCG     | GCTCTTAGGGCCCATCAAGTTT   | YES |
| 60 | <i>RBMS3</i>        | 27303     | 3  | 29628700  | 29628700  | NM_001003792:exon4:c.396+4A>C | CAAActCCACGTTTGAGTGAGC  | TTTTGACAGTCTGCAGCCG      | NO  |
| 61 | <i>REPS2</i>        | 9185      | X  | 17153504  | 17153504  | NM_001080975:exon16:c.A1780G  | GGCTAAAGGCATGTGGGACA    | AGCGAGATTCTACTCACTCT     | YES |
| 62 | <i>SLC1A1</i>       | 6505      | 9  | 4576117   | 4576117   | NM_004170:exon9:c.C992A       | GGAGGAAGGGGATGCCTAT     | AAACC GCAAGCTGGAGTCTG    | YES |
| 63 | <i>SPEG</i>         | 10290     | 2  | 220350190 | 220350190 | NM_005876:exon31:c.A7732T     | GGGGTTCCTTCTGTTCTCTG    | CTAGGTTTGTCAAGGTGGCCC    | YES |
| 64 | <i>TENM1</i>        | 10178     | X  | 123630915 | 123630915 | NM_001163278:exon20:c.G3646T  | ACTCAGTGCTACAATAGGGGC   | CCCAGCCCACAACAACAAC      | YES |
| 65 | <i>TET2</i>         | 54790     | 4  | 106156909 | 106156909 | NM_001127208:exon3:c.C1810T   | GCTGCTGTTGCTGGTTTGA     | CACCAAGCGGAATCCCATCT     | YES |
| 66 | <i>TET2</i>         | 54790     | 4  | 106157290 | 106157290 | NM_001127208:exon3:c.C2191T   | AATCAAGGGCAGTCCAAGG     | GCTGTTGCTGGTTTGGAGG      | YES |
| 67 | <i>TET2</i>         | 54790     | 4  | 106197207 | 106197207 | NM_001127208:exon11:c.G5540A  | TCACGGACATGGTCCTTTCG    | CTGGTGCAGAGGACAACGAT     | YES |
| 68 | <i>TLL1</i>         | 7092      | 4  | 166996054 | 166996054 | NM_012464:exon17:c.A2213T     | TGACATTTGGATAGCCCACCA   | TGTTGGGAACAGGAGAAACCAT   | YES |
| 69 | <i>TLR4</i>         | 7099      | 9  | 120475863 | 120475863 | NM_138557:exon2:c.A857T       | TGAGGACCGACACACCAATG    | TGGCTTGTCCAGTCTCGAAG     | YES |
| 70 | <i>USP24</i>        | 23358     | 1  | 55559689  | 55559689  | NM_015306:exon52:c.T6275A     | ACGATGTAGCCCCAGTGGTA    | CCCCATAGGCCGAACAATGA     | YES |
| 71 | <i>USP34</i>        | 9736      | 2  | 61575224  | 61575224  | NM_014709:exon15:c.T2066C     | CCTGGCAGTGAGGTACAGTC    | TTATTTGAAGTAGGCTTACCCATC | YES |

|    |                |        |    |           |           |                              |                          |                       |     |
|----|----------------|--------|----|-----------|-----------|------------------------------|--------------------------|-----------------------|-----|
| 72 | <i>ZBBX</i>    | 79740  | 3  | 167023579 | 167023579 | NM_001199201:exon17:c.T1577G | ATGTTCTCTCCCGTATGAGTCAC  | TGAGGAAAGCACCTCCTTTGA | YES |
| 73 | <i>ZDHHC14</i> | 79683  | 6  | 158093930 | 158093930 | NM_024630:exon9:c.A1243G     | CTCTCCCAATGCACCTGGAC     | TCATCTTTCCGGGGCATCAC  | YES |
| 74 | <i>ZNF326</i>  | 284695 | 1  | 90470688  | 90470688  | NM_182975:exon4:c.98-4A>G    | GCTTCTCATCTTTGTGTTTTCCCT | CACCACCACTGTGATTGTCCA | YES |
| 75 | <i>ZNF345</i>  | 25850  | 19 | 37368669  | 37368669  | NM_001242472:exon3:c.C937T   | TCCCATAAGCCTTCCCACAG     | GGCTCAGATCTCACTCAGCA  | NO  |
| 76 | <i>ZNF681</i>  | 148213 | 19 | 23926688  | 23926688  | NM_138286:exon4:c.T1664C     | CCTGTGCAATAAGGTGTGAGC    | GGCAAAGCTTCTATCGATCC  | YES |

\*Based on NCBI human reference genome GRC Build 37 (hg19).

Supplementary Table 5. List of 221 selected genes for the targeted sequencing.

|                 |                |                 |                |                |
|-----------------|----------------|-----------------|----------------|----------------|
| <i>ABCA2</i>    | <i>DNAH5</i>   | <i>GRM6</i>     | <i>NOTCH3</i>  | <i>SMC4</i>    |
| <i>ABCC4</i>    | <i>DNMT1</i>   | <i>HDAC4</i>    | <i>NOTCH4</i>  | <i>SOCS3</i>   |
| <i>ACAN</i>     | <i>DOCK8</i>   | <i>HDAC5</i>    | <i>NRAS</i>    | <i>SORBS1</i>  |
| <i>ADAM21</i>   | <i>DROSHA</i>  | <i>HDAC6</i>    | <i>NRXN1</i>   | <i>SPINK5</i>  |
| <i>AKAP13</i>   | <i>DSPP</i>    | <i>HDAC9</i>    | <i>NSD1</i>    | <i>STAB1</i>   |
| <i>ALK</i>      | <i>DUSP27</i>  | <i>HLA-B</i>    | <i>OVGP1</i>   | <i>STAT1</i>   |
| <i>ANKRD11</i>  | <i>DVL2</i>    | <i>HLA-DQB2</i> | <i>PABPC1</i>  | <i>STAT2</i>   |
| <i>ANKRD22</i>  | <i>ENDOG</i>   | <i>HRNR</i>     | <i>PABPC3</i>  | <i>STAT3</i>   |
| <i>AOAH</i>     | <i>EP300</i>   | <i>IGFN1</i>    | <i>PABPC4</i>  | <i>STAT4</i>   |
| <i>ARHGAP22</i> | <i>ERBB2</i>   | <i>IL17REL</i>  | <i>PAK2</i>    | <i>STAT5A</i>  |
| <i>ARHGEF10</i> | <i>ERCC1</i>   | <i>IL22RA1</i>  | <i>PCDH15</i>  | <i>STAT5B</i>  |
| <i>ARHGEF11</i> | <i>ETV1</i>    | <i>IL2RB</i>    | <i>PDE4DIP</i> | <i>STAT6</i>   |
| <i>ARHGEF15</i> | <i>FAM221B</i> | <i>IL31RA</i>   | <i>PDGFRB</i>  | <i>SYNE1</i>   |
| <i>ARID1A</i>   | <i>FAT1</i>    | <i>IL6</i>      | <i>PDK1</i>    | <i>TAP1</i>    |
| <i>ARID1B</i>   | <i>FAT3</i>    | <i>IL7R</i>     | <i>PLCB1</i>   | <i>TBC1D26</i> |
| <i>ARID3A</i>   | <i>FAT4</i>    | <i>ITGA8</i>    | <i>PLCB2</i>   | <i>TET2</i>    |
| <i>ASXL1</i>    | <i>FGFR1</i>   | <i>JAK1</i>     | <i>PLCB3</i>   | <i>TGFBR2</i>  |
| <i>ATR</i>      | <i>FGFR2</i>   | <i>JAK2</i>     | <i>PRDM2</i>   | <i>TLR4</i>    |
| <i>ATRX</i>     | <i>FGFR4</i>   | <i>JAK3</i>     | <i>PRRC2A</i>  | <i>TMEM14B</i> |
| <i>AXIN2</i>    | <i>FNI</i>     | <i>JMJD1C</i>   | <i>PTEN</i>    | <i>TP53</i>    |
| <i>BAGE2</i>    | <i>FOXA1</i>   | <i>KALRN</i>    | <i>PTPN1</i>   | <i>TRAM1L1</i> |
| <i>BAI1</i>     | <i>FRY</i>     | <i>KIF7</i>     | <i>PTPN13</i>  | <i>TYK2</i>    |
| <i>BAI3</i>     | <i>FSHR</i>    | <i>KIR2DL1</i>  | <i>PTPN14</i>  | <i>UGT2A1</i>  |
| <i>BCOR</i>     | <i>FZD1</i>    | <i>KMT2C</i>    | <i>PTPN2</i>   | <i>USP8</i>    |
| <i>BRCA1</i>    | <i>FZD10</i>   | <i>KMT2D</i>    | <i>PTPN3</i>   | <i>WASF1</i>   |
| <i>CASP9</i>    | <i>GAREM</i>   | <i>KRAS</i>     | <i>PTPN4</i>   | <i>XRCC1</i>   |
| <i>CCL23</i>    | <i>GATA3</i>   | <i>KRT3</i>     | <i>PTPRC</i>   | <i>YAPI</i>    |
| <i>CCNB2</i>    | <i>GNAI1</i>   | <i>LEF1</i>     | <i>PTPRF</i>   | <i>ZFHX3</i>   |
| <i>CD93</i>     | <i>GNAI2</i>   | <i>LHCGR</i>    | <i>PTPRG</i>   | <i>ZNF264</i>  |
| <i>CDC27</i>    | <i>GNAI3</i>   | <i>LILRB3</i>   | <i>PTPRM</i>   |                |
| <i>CDH3</i>     | <i>GNAI4</i>   | <i>LRP1B</i>    | <i>PTPRN2</i>  |                |
| <i>CDKN2A</i>   | <i>GNAI5</i>   | <i>MAPK1</i>    | <i>PTPRQ</i>   |                |
| <i>CELSR2</i>   | <i>GNAI1</i>   | <i>MGAT4C</i>   | <i>PTPRR</i>   |                |
| <i>CELSR3</i>   | <i>GNAI2</i>   | <i>MLH1</i>     | <i>PTPRS</i>   |                |
| <i>CEP164</i>   | <i>GNAI3</i>   | <i>MPL</i>      | <i>PTPRT</i>   |                |
| <i>CHD2</i>     | <i>GNAL</i>    | <i>MROH2A</i>   | <i>PTPRZ1</i>  |                |
| <i>CNTROB</i>   | <i>GNAO1</i>   | <i>MSH6</i>     | <i>RAI1</i>    |                |
| <i>CSMD1</i>    | <i>GNAQ</i>    | <i>MSN</i>      | <i>RBI</i>     |                |
| <i>CSMD2</i>    | <i>GNAS</i>    | <i>MUC21</i>    | <i>REST</i>    |                |
| <i>CSMD3</i>    | <i>GNAT1</i>   | <i>MUC4</i>     | <i>RETSAT</i>  |                |
| <i>CYP24A1</i>  | <i>GNAT2</i>   | <i>MUC6</i>     | <i>RHOA</i>    |                |



|                |                |               |                |
|----------------|----------------|---------------|----------------|
| <i>CYP4A11</i> | <i>GPAT2</i>   | <i>MUC7</i>   | <i>RRM1</i>    |
| <i>DAPK1</i>   | <i>GPATCH4</i> | <i>NCKAP5</i> | <i>RUNX1T1</i> |
| <i>DDX3X</i>   | <i>GPR112</i>  | <i>NEK1</i>   | <i>RYR2</i>    |
| <i>DHRS4L1</i> | <i>GPR125</i>  | <i>NFKBIA</i> | <i>RYR3</i>    |
| <i>DICER1</i>  | <i>GPR98</i>   | <i>NLRP3</i>  | <i>SETD2</i>   |
| <i>DNAH11</i>  | <i>GRIN2A</i>  | <i>NOTCH1</i> | <i>SF3B3</i>   |
| <i>DNAH17</i>  | <i>GRM3</i>    | <i>NOTCH2</i> | <i>SH3RF2</i>  |

---

Supplementary Table 6. Summary of targeted sequencing data of the 73 cases of NKTCL.

| Patient ID | Average sequencing depth on target | Coverage of target region* | Fraction of target covered with at least 50× | Fraction of target covered with at least 100× |
|------------|------------------------------------|----------------------------|----------------------------------------------|-----------------------------------------------|
| 1          | 1149                               | 100.00%                    | 99.83%                                       | 99.48%                                        |
| 3          | 1181                               | 100.00%                    | 99.84%                                       | 99.61%                                        |
| 4          | 1232                               | 100.00%                    | 99.60%                                       | 98.97%                                        |
| 6          | 1177                               | 100.00%                    | 99.62%                                       | 99.12%                                        |
| 7          | 1195                               | 100.00%                    | 99.80%                                       | 99.47%                                        |
| 9          | 1559                               | 100.00%                    | 99.84%                                       | 99.55%                                        |
| 13         | 1528                               | 100.00%                    | 99.66%                                       | 99.27%                                        |
| 14         | 1157                               | 100.00%                    | 99.60%                                       | 99.06%                                        |
| 15         | 1481                               | 100.00%                    | 99.64%                                       | 99.19%                                        |
| 16         | 1349                               | 100.00%                    | 99.96%                                       | 99.87%                                        |
| 18         | 1416                               | 100.00%                    | 99.80%                                       | 99.49%                                        |
| 20         | 1102                               | 100.00%                    | 99.38%                                       | 98.58%                                        |
| 21         | 1149                               | 100.00%                    | 99.72%                                       | 99.31%                                        |
| 22         | 1124                               | 99.99%                     | 99.54%                                       | 99.17%                                        |
| 24         | 1161                               | 100.00%                    | 99.76%                                       | 99.41%                                        |
| 25         | 1036                               | 99.99%                     | 99.31%                                       | 98.41%                                        |
| 26         | 1652                               | 100.00%                    | 99.83%                                       | 99.53%                                        |
| 27         | 1428                               | 99.99%                     | 99.88%                                       | 99.70%                                        |
| 29         | 1322                               | 100.00%                    | 99.64%                                       | 99.25%                                        |
| 30         | 1184                               | 100.00%                    | 99.74%                                       | 99.35%                                        |
| 32         | 2290                               | 100.00%                    | 99.84%                                       | 99.59%                                        |
| 33         | 1087                               | 100.00%                    | 99.50%                                       | 98.83%                                        |
| 34         | 1856                               | 100.00%                    | 99.84%                                       | 99.63%                                        |
| 35         | 1158                               | 100.00%                    | 99.59%                                       | 99.06%                                        |
| 36         | 1961                               | 100.00%                    | 99.85%                                       | 99.55%                                        |
| 37         | 1187                               | 100.00%                    | 99.76%                                       | 99.35%                                        |
| 38         | 1157                               | 100.00%                    | 99.69%                                       | 99.17%                                        |
| 39         | 1169                               | 100.00%                    | 99.75%                                       | 99.36%                                        |
| 40         | 1506                               | 100.00%                    | 99.85%                                       | 99.60%                                        |
| 41         | 1099                               | 100.00%                    | 99.45%                                       | 98.60%                                        |
| 43         | 1498                               | 100.00%                    | 99.61%                                       | 99.13%                                        |
| 45         | 1685                               | 100.00%                    | 99.62%                                       | 99.15%                                        |
| 46         | 1116                               | 100.00%                    | 99.82%                                       | 99.53%                                        |
| 47         | 1354                               | 100.00%                    | 99.67%                                       | 99.11%                                        |
| 48         | 1444                               | 100.00%                    | 99.61%                                       | 99.07%                                        |
| 49         | 1797                               | 100.00%                    | 99.92%                                       | 99.77%                                        |
| 50         | 1234                               | 100.00%                    | 99.57%                                       | 99.08%                                        |
| 51         | 1206                               | 100.00%                    | 99.82%                                       | 99.55%                                        |
| 54         | 1351                               | 100.00%                    | 99.38%                                       | 98.47%                                        |
| 57         | 1266                               | 99.99%                     | 99.55%                                       | 98.99%                                        |
| 60         | 1047                               | 99.98%                     | 99.40%                                       | 98.56%                                        |

|      |      |         |        |        |
|------|------|---------|--------|--------|
| 61   | 1165 | 100.00% | 99.72% | 99.27% |
| 63   | 1456 | 99.99%  | 99.76% | 99.43% |
| 64   | 1566 | 100.00% | 99.52% | 98.90% |
| 67   | 2615 | 100.00% | 99.88% | 99.66% |
| 68   | 1575 | 100.00% | 99.79% | 99.39% |
| 69   | 1196 | 100.00% | 99.41% | 98.61% |
| 70   | 1254 | 100.00% | 99.69% | 99.26% |
| 72   | 1283 | 100.00% | 99.71% | 99.10% |
| 76   | 1149 | 100.00% | 99.62% | 99.05% |
| 81   | 1852 | 99.99%  | 99.53% | 99.05% |
| 86   | 1102 | 100.00% | 99.71% | 98.72% |
| 90   | 1129 | 100.00% | 99.74% | 99.38% |
| 91   | 1176 | 100.00% | 99.81% | 99.51% |
| 94   | 1873 | 100.00% | 99.91% | 99.68% |
| 97   | 1308 | 99.99%  | 99.71% | 99.41% |
| 98   | 1544 | 100.00% | 99.80% | 99.55% |
| 100  | 1077 | 100.00% | 99.56% | 99.14% |
| 102  | 1164 | 100.00% | 99.82% | 99.52% |
| 104  | 1379 | 100.00% | 99.82% | 99.54% |
| 105  | 1279 | 100.00% | 99.93% | 99.75% |
| 107  | 1296 | 100.00% | 99.89% | 99.72% |
| 109  | 3352 | 100.00% | 99.95% | 99.83% |
| 110  | 1617 | 100.00% | 99.74% | 99.40% |
| 111  | 1011 | 100.00% | 99.61% | 99.10% |
| 112  | 2271 | 100.00% | 99.85% | 99.59% |
| 113  | 1401 | 100.00% | 99.54% | 99.07% |
| 114  | 1612 | 100.00% | 99.80% | 99.48% |
| 115  | 1128 | 100.00% | 99.78% | 99.45% |
| 118  | 1395 | 100.00% | 99.60% | 99.12% |
| 120  | 1726 | 99.99%  | 99.57% | 99.10% |
| 121  | 2032 | 100.00% | 99.77% | 99.44% |
| 122  | 1416 | 100.00% | 99.64% | 99.25% |
| N1   | 1170 | 100.00% | 99.76% | 99.40% |
| N100 | 1216 | 100.00% | 99.71% | 99.36% |
| N102 | 1191 | 100.00% | 99.78% | 99.41% |
| N104 | 1264 | 100.00% | 99.73% | 99.29% |
| N105 | 1373 | 100.00% | 99.78% | 99.46% |
| N107 | 1433 | 100.00% | 99.87% | 99.62% |
| N109 | 1608 | 99.99%  | 99.74% | 99.37% |
| N110 | 1185 | 99.99%  | 99.75% | 99.37% |
| N111 | 1185 | 100.00% | 99.69% | 99.28% |
| N112 | 1168 | 100.00% | 99.80% | 99.47% |
| N113 | 1190 | 99.99%  | 99.67% | 99.21% |
| N114 | 1470 | 100.00% | 99.89% | 99.60% |
| N115 | 1974 | 100.00% | 99.89% | 99.62% |
| N118 | 1480 | 100.00% | 99.63% | 99.16% |

|      |      |         |        |        |
|------|------|---------|--------|--------|
| N120 | 1683 | 100.00% | 99.77% | 99.47% |
| N121 | 1531 | 100.00% | 99.70% | 99.31% |
| N122 | 1839 | 100.00% | 99.78% | 99.48% |
| N13  | 1710 | 100.00% | 99.87% | 99.54% |
| N14  | 1173 | 99.99%  | 99.78% | 99.40% |
| N15  | 1395 | 100.00% | 99.89% | 99.54% |
| N16  | 1196 | 99.99%  | 99.88% | 99.59% |
| N18  | 1163 | 99.99%  | 99.82% | 99.49% |
| N20  | 1393 | 100.00% | 99.76% | 99.40% |
| N21  | 1203 | 100.00% | 99.90% | 99.63% |
| N22  | 1194 | 100.00% | 99.86% | 99.61% |
| N24  | 1496 | 100.00% | 99.93% | 99.65% |
| N25  | 1218 | 100.00% | 99.85% | 99.55% |
| N26  | 1206 | 100.00% | 99.93% | 99.76% |
| N27  | 1335 | 99.99%  | 99.82% | 99.56% |
| N29  | 1296 | 100.00% | 99.87% | 99.60% |
| N3   | 1158 | 100.00% | 99.84% | 99.48% |
| N30  | 1243 | 100.00% | 99.84% | 99.46% |
| N32  | 1167 | 100.00% | 99.80% | 99.41% |
| N33  | 1287 | 100.00% | 99.88% | 99.59% |
| N34  | 1101 | 99.99%  | 99.79% | 99.35% |
| N35  | 1271 | 100.00% | 99.89% | 99.58% |
| N36  | 1282 | 100.00% | 99.77% | 99.39% |
| N37  | 1247 | 99.99%  | 99.86% | 99.54% |
| N38  | 1458 | 100.00% | 99.92% | 99.72% |
| N39  | 1233 | 100.00% | 99.82% | 99.51% |
| N4   | 1146 | 100.00% | 99.86% | 99.53% |
| N40  | 1560 | 100.00% | 99.90% | 99.62% |
| N41  | 1327 | 99.99%  | 99.83% | 99.48% |
| N42  | 1195 | 99.99%  | 99.70% | 99.22% |
| N43  | 1247 | 100.00% | 99.71% | 99.34% |
| N45  | 1865 | 100.00% | 99.75% | 99.42% |
| N46  | 1456 | 100.00% | 99.83% | 99.50% |
| N47  | 1331 | 100.00% | 99.90% | 99.66% |
| N48  | 1377 | 100.00% | 99.71% | 99.32% |
| N49  | 1281 | 100.00% | 99.72% | 99.25% |
| N50  | 1729 | 100.00% | 99.81% | 99.48% |
| N51  | 1895 | 100.00% | 99.89% | 99.66% |
| N54  | 1408 | 100.00% | 99.75% | 99.41% |
| N55  | 1577 | 100.00% | 99.81% | 99.46% |
| N57  | 1572 | 100.00% | 99.77% | 99.43% |
| N6   | 1260 | 100.00% | 99.85% | 99.48% |
| N60  | 1324 | 100.00% | 99.90% | 99.67% |
| N61  | 1266 | 99.99%  | 99.84% | 99.54% |
| N63  | 1280 | 100.00% | 99.73% | 99.30% |
| N64  | 1458 | 100.00% | 99.83% | 99.47% |

|     |      |         |        |        |
|-----|------|---------|--------|--------|
| N65 | 1933 | 99.99%  | 99.94% | 99.78% |
| N67 | 1393 | 100.00% | 99.86% | 99.50% |
| N68 | 1360 | 100.00% | 99.86% | 99.53% |
| N69 | 1225 | 99.99%  | 99.67% | 99.20% |
| N7  | 1228 | 100.00% | 99.79% | 99.43% |
| N70 | 1938 | 100.00% | 99.93% | 99.74% |
| N72 | 1380 | 100.00% | 99.88% | 99.60% |
| N9  | 1778 | 99.99%  | 99.76% | 99.42% |
| N90 | 1639 | 100.00% | 99.85% | 99.53% |
| N91 | 1343 | 100.00% | 99.89% | 99.66% |
| N94 | 1186 | 100.00% | 99.93% | 99.72% |
| N97 | 1688 | 99.99%  | 99.80% | 99.49% |
| N98 | 2093 | 100.00% | 99.82% | 99.50% |

---

\*Based on NCBI human reference genome GRC Build 37 (hg19).

Supplementary Table 7. List of somatic non-silent mutations identified by targeted deep sequencing of 73 cases of NKTCL.

| NO | Patient ID | Hugo Symbol     | Entrez Gene Id | Chromosome | Position* | Variant Classification | Reference Allele | Tumor Allele | Variant allele frequency | Protein Change |
|----|------------|-----------------|----------------|------------|-----------|------------------------|------------------|--------------|--------------------------|----------------|
| 1  | 1          | <i>C21orf33</i> | 8209           | 21         | 45563185  | Missense               | C                | T            | 0.333                    | p.A176V        |
| 2  | 1          | <i>ZNF473</i>   | 25888          | 19         | 50550045  | Missense               | G                | T            | 0.133                    | p.G782V        |
| 3  | 1          | <i>GNAI2</i>    | 2771           | 3          | 50294992  | Frame_Shift_Ins        | A                | ATGATACC     | 0.02                     | p.K232fs       |
| 4  | 1          | <i>NOTCH3</i>   | 4854           | 19         | 15288858  | Missense               | C                | A            | 0.105                    | p.R1294L       |
| 5  | 3          | <i>DNAH17</i>   | 8632           | 17         | 76449472  | Missense               | G                | C            | 0.196                    | p.D3494E       |
| 6  | 3          | <i>NRXN1</i>    | 9378           | 2          | 50699451  | Missense               | C                | T            | 0.339                    | p.E1077K       |
| 7  | 3          | <i>LRP1B</i>    | 53353          | 2          | 141114025 | Nonsense               | C                | A            | 0.312                    | p.E3806X       |
| 8  | 3          | <i>ZNF239</i>   | 8187           | 10         | 44052630  | Missense               | A                | G            | 0.347                    | p.F300L        |
| 9  | 3          | <i>PTPRZ1</i>   | 5803           | 7          | 121681026 | Missense               | C                | A            | 0.171                    | p.H1065N       |
| 10 | 3          | <i>FN1</i>      | 2335           | 2          | 216241226 | Missense               | A                | G            | 0.297                    | p.I1780T       |
| 11 | 3          | <i>FOXA1</i>    | 3169           | 14         | 38061604  | Missense               | G                | T            | 0.298                    | p.P129T        |
| 12 | 3          | <i>CD93</i>     | 22918          | 20         | 23065638  | Nonsense               | G                | A            | 0.331                    | p.Q398X        |
| 13 | 3          | <i>ZNF585B</i>  | 92285          | 19         | 37676424  | Missense               | C                | T            | 0.087                    | p.R672Q        |
| 14 | 3          | <i>DNAH5</i>    | 1767           | 5          | 13913926  | Missense               | T                | C            | 0.314                    | p.T488A        |
| 15 | 3          | <i>ADAM20</i>   | 8748           | 14         | 70989955  | Missense               | G                | A            | 0.061                    | p.T557M        |
| 16 | 3          | <i>TET2</i>     | 54790          | 4          | 106197207 | Nonsense               | G                | A            | 0.683                    | p.W1847X       |
| 17 | 3          | <i>KMT2D</i>    | 8085           | 12         | 49437567  | Splice_Site            | T                | A            | 0.296                    | c.5320-2A>T    |
| 18 | 4          | <i>FGFR2</i>    | 2263           | 10         | 123278280 | Missense               | C                | T            | 0.352                    | p.A335T        |
| 19 | 4          | <i>CREBBP</i>   | 1387           | 16         | 3779700   | Missense               | C                | T            | 0.1                      | p.C1745Y       |
| 20 | 4          | <i>ANKRD11</i>  | 29123          | 16         | 89350300  | Missense               | C                | T            | 0.387                    | p.D884N        |
| 21 | 4          | <i>GNAZ</i>     | 2781           | 22         | 23438591  | Missense               | G                | A            | 0.091                    | p.E237K        |
| 22 | 4          | <i>KRT77</i>    | 374454         | 12         | 53086212  | Missense               | C                | T            | 0.1                      | p.E474K        |
| 23 | 4          | <i>LHCGR</i>    | 3973           | 2          | 48915492  | Missense               | G                | A            | 0.357                    | p.H482Y        |
| 24 | 4          | <i>KIR3DL2</i>  | 3812           | 19         | 55377319  | Missense               | C                | A            | 0.376                    | p.L337I        |
| 25 | 4          | <i>TET2</i>     | 54790          | 4          | 106156909 | Nonsense               | C                | T            | 0.783                    | p.Q604X        |
| 26 | 4          | <i>MROH2A</i>   | 339766         | 2          | 234704914 | Missense               | C                | T            | 0.041                    | p.R406C        |
| 27 | 4          | <i>CSMD3</i>    | 114788         | 8          | 113318391 | Missense               | G                | C            | 0.349                    | p.T2535R       |
| 28 | 6          | <i>ZNF585A</i>  | 199704         | 19         | 37642891  | Missense               | G                | A            | 0.091                    | p.A637V        |
| 29 | 6          | <i>GAREM</i>    | 64762          | 18         | 29847959  | Missense               | C                | T            | 0.176                    | p.E836K        |
| 30 | 6          | <i>NCOA6</i>    | 23054          | 20         | 33345826  | Missense               | G                | T            | 0.086                    | p.P242Q        |
| 31 | 7          | <i>ZNF184</i>   | 7738           | 6          | 27419310  | Missense               | G                | T            | 0.058                    | p.D676E        |
| 32 | 7          | <i>ENDOG</i>    | 2021           | 9          | 131581150 | Nonsense               | G                | T            | 0.071                    | p.E63X         |
| 33 | 7          | <i>JMJD1C</i>   | 221037         | 10         | 65140170  | Missense               | A                | C            | 0.095                    | p.F81V         |
| 34 | 7          | <i>ZNF250</i>   | 58500          | 8          | 146107496 | Missense               | C                | T            | 0.099                    | p.G358R        |
| 35 | 7          | <i>BAI3</i>     | 577            | 6          | 70071146  | Missense               | A                | T            | 0.087                    | p.K1327N       |
| 36 | 7          | <i>KMT2D</i>    | 8085           | 12         | 49424057  | Frame_Shift_Del        | CAGTGCCCT        | A            | 0.058                    | p.R4659fs      |
| 37 | 7          | <i>PLCB3</i>    | 5331           | 11         | 64029509  | Missense               | G                | A            | 0.055                    | p.V600I        |
| 38 | 9          | <i>MAPK1</i>    | 5594           | 22         | 22127164  | Missense               | C                | T            | 0.117                    | p.E322K        |
| 39 | 13         | <i>DAPK1</i>    | 1612           | 9          | 90258316  | Missense               | G                | A            | 0.225                    | p.C315Y        |
| 40 | 13         | <i>NOTCH3</i>   | 4854           | 19         | 15285162  | Missense               | C                | A            | 0.043                    | p.D1485Y       |
| 41 | 13         | <i>DNAH9</i>    | 1770           | 17         | 11833313  | Missense               | T                | C            | 0.133                    | p.I315T        |
| 42 | 13         | <i>GRIN2D</i>   | 2906           | 19         | 48923009  | Missense               | C                | A            | 0.5                      | p.L677M        |
| 43 | 13         | <i>TLR4</i>     | 7099           | 9          | 120475863 | Missense               | A                | T            | 0.236                    | p.N286I        |
| 44 | 13         | <i>FGFR4</i>    | 2264           | 5          | 176522367 | Missense               | C                | T            | 0.303                    | p.S479L        |
| 45 | 13         | <i>KALRN</i>    | 8997           | 3          | 123987830 | Missense               | A                | C            | 0.25                     | p.T231P        |
| 46 | 13         | <i>FRY</i>      | 10129          | 13         | 32808741  | Missense               | T                | A            | 0.255                    | p.V1853D       |
| 47 | 13         | <i>FAT1</i>     | 2195           | 4          | 187629624 | Missense               | A                | G            | 0.275                    | p.V453A        |
| 48 | 14         | <i>MAPK1</i>    | 5594           | 22         | 22221708  | In_Frame_Del           | CCCGCCG          | C            | 0.047                    | p.6_8del       |
| 49 | 14         | <i>LEF1</i>     | 51176          | 4          | 108969874 | Missense               | G                | T            | 0.139                    | p.A372D        |
| 50 | 14         | <i>PDE4DIP</i>  | 9659           | 1          | 144906196 | Missense               | C                | T            | 0.183                    | p.D976N        |
| 51 | 14         | <i>CSMD1</i>    | 64478          | 8          | 2944708   | Missense               | C                | A            | 0.143                    | p.G2462V       |
| 52 | 14         | <i>ZKSCAN1</i>  | 7586           | 7          | 99631581  | Missense               | G                | A            | 0.083                    | p.G272R        |
| 53 | 14         | <i>DDX3X</i>    | 1654           | X          | 41196704  | Frame_Shift_Del        | TACAGCCAC        | G            | 0.353                    | p.G30fs        |
| 54 | 14         | <i>FZD5</i>     | 7855           | 2          | 208631822 | Missense               | C                | A            | 0.167                    | p.G548W        |
| 55 | 14         | <i>PTPN13</i>   | 5783           | 4          | 87671727  | Nonsense               | A                | T            | 0.171                    | p.R919X        |
| 56 | 14         | <i>UGT2A1</i>   | 10941          | 4          | 70513350  | Missense               | G                | A            | 0.164                    | p.L5F          |
| 57 | 14         | <i>ARID1A</i>   | 8289           | 1          | 27099361  | Nonsense               | C                | T            | 0.145                    | p.Q1200X       |
| 58 | 14         | <i>ATRX</i>     | 546            | X          | 76953110  | Missense               | G                | A            | 0.486                    | p.S68L         |
| 59 | 15         | <i>SYNE1</i>    | 23345          | 6          | 152763329 | Missense               | C                | T            | 0.586                    | p.A1304T       |
| 60 | 15         | <i>KALRN</i>    | 8997           | 3          | 123987945 | Missense               | C                | T            | 0.397                    | p.P269L        |
| 61 | 15         | <i>HDAC9</i>    | 9734           | 7          | 18688277  | Missense               | C                | A            | 0.329                    | p.Q400K        |
| 62 | 15         | <i>ASXL1</i>    | 171023         | 20         | 31021635  | Frame_Shift_Ins        | G                | GT           | 0.315                    | p.R545fs       |
| 63 | 15         | <i>POU4F2</i>   | 5458           | 4          | 147560497 | Nonsense               | C                | T            | 0.385                    | p.R69X         |
| 64 | 15         | <i>KALRN</i>    | 8997           | 3          | 124132413 | Missense               | C                | T            | 0.362                    | p.R813C        |
| 65 | 15         | <i>NFKBIA</i>   | 4792           | 14         | 35872949  | Missense               | G                | T            | 0.105                    | p.R95S         |
| 66 | 15         | <i>PTPRG</i>    | 5793           | 3          | 62204600  | Missense               | T                | A            | 0.351                    | p.V744E        |
| 67 | 16         | <i>GNAS</i>     | 2778           | 20         | 57470686  | In_Frame_Del           | AAGCACC          | A            | 0.153                    | p.54_55del     |
| 68 | 16         | <i>GRM3</i>     | 2913           | 7          | 86415913  | Missense               | G                | A            | 0.114                    | p.A269T        |
| 69 | 16         | <i>NOTCH2</i>   | 4853           | 1          | 120480552 | Missense               | A                | G            | 0.164                    | p.C1089R       |
| 70 | 16         | <i>KMT2D</i>    | 8085           | 12         | 49420655  | Missense               | A                | G            | 0.104                    | p.C5032R       |
| 71 | 16         | <i>CDH3</i>     | 1001           | 16         | 68725767  | Missense               | G                | T            | 0.118                    | p.C647F        |

|     |    |                   |        |    |           |                 |         |           |       |                   |
|-----|----|-------------------|--------|----|-----------|-----------------|---------|-----------|-------|-------------------|
| 72  | 16 | <i>HDAC4</i>      | 9759   | 2  | 240111555 | Missense        | C       | T         | 0.027 | p.E105K           |
| 73  | 16 | <i>SMC4</i>       | 10051  | 3  | 160150844 | Missense        | G       | T         | 0.177 | p.K1187N          |
| 74  | 16 | <i>KMT2D</i>      | 8085   | 12 | 49433256  | Nonsense        | G       | A         | 0.117 | p.Q2731X          |
| 75  | 16 | <i>SYNE1</i>      | 23345  | 6  | 152787212 | Missense        | G       | T         | 0.136 | p.S552Y           |
| 76  | 16 | <i>ERBB2</i>      | 2064   | 17 | 37876044  | Missense        | G       | T         | 0.134 | p.V635L           |
| 77  | 16 | <i>ATRX</i>       | 546    | X  | 76937942  | Missense        | C       | T         | 0.026 | p.V898I           |
| 78  | 16 | <i>R3HCC1L</i>    | 27291  | 10 | 99922734  | Splice_Site     | T       | C         | 0.091 | -                 |
| 79  | 18 | <i>GPR98</i>      | 84059  | 5  | 90049445  | Missense        | G       | T         | 0.329 | p.D3726Y          |
| 80  | 18 | <i>TPRK</i>       | 5796   | 6  | 128304509 | Nonsense        | G       | A         | 0.08  | p.R1089X          |
| 81  | 18 | <i>DNAH5</i>      | 1767   | 5  | 13727663  | Missense        | G       | A         | 0.472 | p.R3996C          |
| 82  | 18 | <i>ARHGAP22</i>   | 58504  | 10 | 49667878  | Missense        | G       | A         | 0.341 | p.R80C            |
| 83  | 20 | <i>DAPK1</i>      | 1612   | 9  | 90322148  | Frame_Shift_Del | GC      | G         | 0.349 | p.A1388fs         |
| 84  | 20 | <i>PTPRN2</i>     | 5799   | 7  | 157475615 | Missense        | C       | G         | 0.31  | p.K584N           |
| 85  | 20 | <i>ZNF354B</i>    | 117608 | 5  | 178310466 | Missense        | G       | A         | 0.125 | p.S338N           |
| 86  | 21 | <i>DDX3X</i>      | 1654   | X  | 41205655  | Missense        | G       | A         | 0.583 | p.A481T           |
| 87  | 21 | <i>ADAM20</i>     | 8748   | 14 | 70990018  | Missense        | G       | A         | 0.214 | p.P536L           |
| 88  | 21 | <i>TFEB</i>       | 7942   | 6  | 41658930  | Missense        | G       | A         | 0.167 | p.R222C           |
| 89  | 21 | <i>MSN</i>        | 4478   | X  | 64959601  | Nonsense        | C       | A         | 0.54  | p.S527X           |
| 90  | 21 | <i>LRP1B</i>      | 53353  | 2  | 141092049 | Missense        | C       | A         | 0.254 | p.V4066L          |
| 91  | 21 | <i>STAT3</i>      | 6774   | 17 | 40474482  | Missense        | T       | A         | 0.42  | p.Y640F           |
| 92  | 22 | <i>CCND1</i>      | 595    | 11 | 69462827  | Missense        | G       | A         | 0.08  | p.G214S           |
| 93  | 24 | <i>ZFP1</i>       | 162239 | 16 | 75204081  | Missense        | G       | A         | 0.25  | p.G358D           |
| 94  | 24 | <i>GPR125</i>     | 166647 | 4  | 22463415  | Missense        | G       | C         | 0.2   | p.L116V           |
| 95  | 24 | <i>AMOT</i>       | 154796 | X  | 112058834 | Nonsense        | G       | A         | 0.133 | p.Q382X           |
| 96  | 24 | <i>CSMD3</i>      | 114788 | 8  | 113318320 | Nonsense        | G       | A         | 0.15  | p.R2559X          |
| 97  | 25 | <i>DROSHA</i>     | 29102  | 5  | 31405796  | Missense        | C       | T         | 0.077 | p.A1291T          |
| 98  | 25 | <i>DSPP</i>       | 1834   | 4  | 88535832  | In_Frame_Ins    | A       | (GTGACAG) | 0.062 | D673delinsDSSDSSS |
| 99  | 25 | <i>BAI1</i>       | 575    | 8  | 143625693 | Missense        | A       | G         | 0.25  | p.E1557G          |
| 100 | 25 | <i>ASXL1</i>      | 171023 | 20 | 31023163  | Missense        | A       | G         | 0.144 | p.E883G           |
| 101 | 25 | <i>KMT2C</i>      | 58508  | 7  | 151875018 | Missense        | C       | T         | 0.068 | p.G2507E          |
| 102 | 25 | <i>RYR2</i>       | 6262   | 1  | 237905623 | Missense        | G       | A         | 0.056 | p.G3707S          |
| 103 | 25 | <i>ZFH3</i>       | 463    | 16 | 72992201  | Missense        | C       | T         | 0.048 | p.G615D           |
| 104 | 25 | <i>STAB1</i>      | 23166  | 3  | 52542344  | Missense        | G       | A         | 0.06  | p.G735D           |
| 105 | 25 | <i>FLG2</i>       | 388698 | 1  | 152327548 | Missense        | C       | T         | 0.25  | p.G905E           |
| 106 | 25 | <i>ANKRD11</i>    | 29123  | 16 | 89357429  | Missense        | T       | C         | 0.158 | p.N130S           |
| 107 | 25 | <i>CSMD1</i>      | 64478  | 8  | 2954496   | Missense        | G       | T         | 0.068 | p.P2338Q          |
| 108 | 25 | <i>SF3B3</i>      | 23450  | 16 | 70599104  | Missense        | G       | A         | 0.191 | p.R867Q           |
| 109 | 25 | <i>CSMD3</i>      | 114788 | 8  | 113277741 | Missense        | G       | A         | 0.063 | p.S3027F          |
| 110 | 25 | <i>ARID1A</i>     | 8289   | 1  | 27106891  | Missense        | G       | A         | 0.048 | p.V2168M          |
| 111 | 26 | <i>GRM6</i>       | 2916   | 5  | 178419057 | Missense        | C       | A         | 0.152 | p.A178S           |
| 112 | 26 | <i>RYR2</i>       | 6262   | 1  | 237819173 | Missense        | C       | A         | 0.16  | p.A2673E          |
| 113 | 26 | <i>FSHR</i>       | 2492   | 2  | 49381414  | Missense        | G       | T         | 0.166 | p.A48D            |
| 114 | 26 | <i>CELSR1</i>     | 9620   | 22 | 46806417  | Missense        | G       | T         | 0.154 | p.P1604H          |
| 115 | 26 | <i>DNAH17</i>     | 8632   | 17 | 76422617  | Missense        | G       | A         | 0.166 | p.P4279L          |
| 116 | 26 | <i>NRXN1</i>      | 9378   | 2  | 50149175  | Missense        | C       | A         | 0.118 | p.Q412H           |
| 117 | 26 | <i>HLA-A</i>      | 3105   | 6  | 29911113  | Frame_Shift_Ins | C       | CG        | 0.111 | p.R138fs          |
| 118 | 26 | <i>CSMD2</i>      | 114784 | 1  | 34204872  | Missense        | C       | T         | 0.159 | p.S746N           |
| 119 | 27 | <i>DDX3X</i>      | 1654   | X  | 41205613  | Missense        | G       | A         | 0.651 | p.A467T           |
| 120 | 27 | <i>CSMD3</i>      | 114788 | 8  | 113363409 | Missense        | C       | A         | 0.22  | p.C2003F          |
| 121 | 27 | <i>ZSCAN16</i>    | 80345  | 6  | 28097571  | Missense        | G       | A         | 0.333 | p.C297Y           |
| 122 | 27 | <i>KCTD17</i>     | 79734  | 22 | 37458621  | Missense        | G       | A         | 1     | p.G294E           |
| 123 | 27 | <i>NOTCH3</i>     | 4854   | 19 | 15289953  | Missense        | G       | A         | 0.211 | p.R1201C          |
| 124 | 29 | <i>MSN</i>        | 4478   | X  | 64958992  | Frame_Shift_Ins | A       | AC        | 0.691 | p.D502fs          |
| 125 | 29 | <i>KRT5</i>       | 3852   | 12 | 52913745  | In_Frame_Ins    | A       | ACCG      | 0.568 | p.G112delinsGG    |
| 126 | 29 | <i>DDX3X</i>      | 1654   | X  | 41204711  | Missense        | G       | A         | 0.768 | p.G393S           |
| 127 | 29 | <i>IL17REL</i>    | 400935 | 22 | 50439514  | Missense        | G       | T         | 0.354 | p.H36N            |
| 128 | 29 | <i>GAREM</i>      | 64762  | 18 | 29867745  | Missense        | T       | C         | 0.036 | p.K272R           |
| 129 | 29 | <i>FZD1</i>       | 8321   | 7  | 90895013  | Missense        | A       | C         | 0.281 | p.K273T           |
| 130 | 29 | <i>DVL2</i>       | 1856   | 17 | 7129551   | Missense        | T       | C         | 0.052 | p.K615R           |
| 131 | 29 | <i>TRAM1L1</i>    | 133022 | 4  | 118005907 | Missense        | A       | C         | 0.325 | p.L215V           |
| 132 | 29 | <i>PTPN14</i>     | 5784   | 1  | 214558072 | Missense        | A       | C         | 0.311 | p.L376V           |
| 133 | 29 | <i>ST6GALNAC5</i> | 81849  | 1  | 77334276  | Missense        | C       | A         | 0.154 | p.P37Q            |
| 134 | 29 | <i>TET2</i>       | 54790  | 4  | 106157290 | Nonsense        | C       | T         | 0.612 | p.Q731X           |
| 135 | 29 | <i>GPR125</i>     | 166647 | 4  | 22475411  | Missense        | T       | C         | 0.286 | p.S105G           |
| 136 | 29 | <i>DNAH11</i>     | 8701   | 7  | 21641193  | Missense        | G       | T         | 0.35  | p.S1202I          |
| 137 | 29 | <i>FAT1</i>       | 2195   | 4  | 187525580 | Nonsense        | G       | C         | 0.054 | p.S3500X          |
| 138 | 29 | <i>LRP1B</i>      | 53353  | 2  | 141771191 | Missense        | T       | C         | 0.329 | p.T772A           |
| 139 | 30 | <i>FZD9</i>       | 8326   | 7  | 72848543  | Missense        | C       | T         | 0.5   | p.A69V            |
| 140 | 30 | <i>ZNF852</i>     | 285346 | 3  | 44541451  | Missense        | C       | T         | 0.182 | p.C273Y           |
| 141 | 30 | <i>NEK1</i>       | 4750   | 4  | 170354703 | Missense        | C       | T         | 0.211 | p.E863K           |
| 142 | 30 | <i>MROH2A</i>     | 339766 | 2  | 234704345 | Missense        | T       | C         | 0.112 | p.V341A           |
| 143 | 30 | <i>RYR1</i>       | 6261   | 19 | 39063910  | Missense        | G       | A         | 0.095 | p.V4693M          |
| 144 | 30 | <i>ACAN</i>       | 176    | 15 | 89381891  | Splice_Site     | C       | T         | 0.186 | c.71-3C>T         |
| 145 | 32 | <i>GNAQ</i>       | 2776   | 9  | 80537112  | Missense        | T       | A         | 0.16  | p.T96S            |
| 146 | 33 | <i>CD93</i>       | 22918  | 20 | 23066788  | In_Frame_Del    | GAGCAGC | G         | 0.021 | p.12_14del        |
| 147 | 33 | <i>ZSCAN16</i>    | 80345  | 6  | 28097385  | Missense        | G       | A         | 0.105 | p.R235Q           |

|     |    |                  |           |    |           |                 |           |       |       |                   |
|-----|----|------------------|-----------|----|-----------|-----------------|-----------|-------|-------|-------------------|
| 148 | 34 | <i>NCOA3</i>     | 8202      | 20 | 46279830  | In_Frame_Del    | GCAGCAA   | G     | 0.313 | p.1252_1253del    |
| 149 | 34 | <i>GNAI2</i>     | 2768      | 7  | 2883737   | In_Frame_Del    | GCCC      | G     | 0.106 | p.19_20del        |
| 150 | 34 | <i>ARID1B</i>    | 57492     | 6  | 157100040 | In_Frame_Del    | iAGGAGCAG | G     | 0.307 | p.326_331del      |
| 151 | 34 | <i>PPP1R15A</i>  | 23645     | 19 | 49377540  | In_Frame_Del    | AGAG      | A     | 0.426 | p.351_351del      |
| 152 | 34 | <i>LMNA</i>      | 4000      | 1  | 156108372 | In_Frame_Del    | GCAT      | G     | 1.283 | p.568_569del      |
| 153 | 34 | <i>LILRB4</i>    | 11006     | 19 | 55175799  | Missense        | C         | T     | 0.427 | p.A202V           |
| 154 | 34 | <i>NCKAP5</i>    | 344148    | 2  | 133547730 | Missense        | C         | T     | 0.495 | p.A320T           |
| 155 | 34 | <i>DNAH17</i>    | 8632      | 17 | 76570793  | Frame_Shift_Del | ACCT      | A     | 0.507 | p.E115fs          |
| 156 | 34 | <i>FN1</i>       | 2335      | 2  | 216226765 | In_Frame_Ins    | T         | TCAG  | 0.195 | p.E2129delinsAE   |
| 157 | 34 | <i>RAD9A</i>     | 5883      | 11 | 67164815  | In_Frame_Ins    | G         | GGAA  | 1.04  | p.E270delinsEE    |
| 158 | 34 | <i>TP53</i>      | 7157      | 17 | 7577153   | Missense        | C         | T     | 0.081 | p.G130D           |
| 159 | 34 | <i>DDX3X</i>     | 1654      | X  | 41203046  | Missense        | G         | A     | 0.636 | p.G230S           |
| 160 | 34 | <i>PTPRG</i>     | 5793      | 3  | 61547992  | Missense        | A         | T     | 0.476 | p.I11F            |
| 161 | 34 | <i>FAT3</i>      | 120114    | 11 | 92534702  | Missense        | G         | A     | 0.17  | p.M2841I          |
| 162 | 34 | <i>PRRC2B</i>    | 84726     | 9  | 134319671 | Missense        | T         | C     | 0.5   | p.V190A           |
| 163 | 34 | <i>PTPRT</i>     | 11122     | 20 | 41420091  | Missense        | A         | G     | 0.494 | p.V77A            |
| 164 | 34 | <i>TP53</i>      | 7157      | 17 | 7578493   | Nonsense        | C         | T     | 0.116 | p.W14X            |
| 165 | 34 | <i>DNAH5</i>     | 1767      | 5  | 13789026  | Splice_Site     | G         | A     | 0.503 | c.8449-3C>T       |
| 166 | 36 | <i>PCDH15</i>    | 65217     | 10 | 55617008  | Nonsense        | G         | A     | 0.135 | p.Q1174X          |
| 167 | 36 | <i>PVRL1</i>     | 5818      | 11 | 119535660 | Missense        | G         | A     | 0.667 | p.R451C           |
| 168 | 36 | <i>GNAQ</i>      | 2776      | 9  | 80537112  | Missense        | T         | A     | 0.121 | p.T96S            |
| 169 | 37 | <i>GPR98</i>     | 84059     | 5  | 89990063  | Missense        | C         | G     | 0.088 | p.A2497G          |
| 170 | 37 | <i>CSMD1</i>     | 64478     | 8  | 3072096   | Missense        | A         | G     | 0.202 | p.L1597P          |
| 171 | 37 | <i>KIF7</i>      | 374654    | 15 | 90192418  | Missense        | C         | T     | 0.175 | p.R237H           |
| 172 | 37 | <i>GNAS</i>      | 2778      | 20 | 57430184  | Nonsense        | C         | T     | 0.165 | p.R622X           |
| 173 | 38 | <i>HDGFL1</i>    | 154150    | 6  | 22570340  | Missense        | C         | T     | 0.111 | p.A179V           |
| 174 | 38 | <i>DDX3X</i>     | 1654      | X  | 41202581  | Missense        | A         | C     | 0.258 | p.D203A           |
| 175 | 38 | <i>PTPN3</i>     | 5774      | 9  | 112166751 | Missense        | C         | T     | 0.225 | p.G312R           |
| 176 | 38 | <i>KAT6B</i>     | 23522     | 10 | 76781981  | Nonsense        | A         | T     | 0.167 | p.K939X           |
| 177 | 38 | <i>CYP4A11</i>   | 1579      | 1  | 47398707  | Missense        | A         | T     | 0.218 | p.L412H           |
| 178 | 38 | <i>TET2</i>      | 54790     | 4  | 106157735 | Frame_Shift_Del | TTCACAGG  | T     | 0.144 | p.L879fs          |
| 179 | 38 | <i>PTPN13</i>    | 5783      | 4  | 87692418  | Missense        | A         | G     | 0.224 | p.N1442S          |
| 180 | 38 | <i>LRP1B</i>     | 53353     | 2  | 141214086 | Missense        | G         | C     | 0.114 | p.P3301A          |
| 181 | 38 | <i>TET2</i>      | 54790     | 4  | 106196267 | Nonsense        | C         | T     | 0.249 | p.Q1534X          |
| 182 | 38 | <i>ABCA2</i>     | 20        | 9  | 139915878 | Missense        | C         | T     | 0.375 | p.R288Q           |
| 183 | 38 | <i>ZSCAN22</i>   | 342945    | 19 | 58850489  | Nonsense        | C         | T     | 0.274 | p.R425X           |
| 184 | 38 | <i>CTCF</i>      | 140690    | 20 | 56071319  | Missense        | C         | G     | 0.364 | p.R697P           |
| 185 | 38 | <i>NRXN1</i>     | 9378      | 2  | 50724787  | Nonsense        | G         | A     | 0.12  | p.R855X           |
| 186 | 39 | <i>STAB1</i>     | 23166     | 3  | 52535230  | Missense        | C         | T     | 0.034 | p.P43S            |
| 187 | 39 | <i>PTPRS</i>     | 5802      | 19 | 5208380   | Missense        | C         | T     | 0.043 | p.R1390Q          |
| 188 | 39 | <i>GRM4</i>      | 2914      | 6  | 34003461  | Missense        | G         | A     | 0.083 | p.S693L           |
| 189 | 40 | <i>AXIN2</i>     | 8313      | 17 | 63533685  | Missense        | G         | A     | 0.167 | p.A490V           |
| 190 | 40 | <i>MLH1</i>      | 4292      | 3  | 37092139  | Missense        | T         | C     | 0.076 | p.C687R           |
| 191 | 40 | <i>DDX3X</i>     | 1654      | X  | 41205858  | Missense        | G         | C     | 0.336 | p.G517A           |
| 192 | 40 | <i>STAT3</i>     | 6774      | 17 | 40469200  | Missense        | G         | A     | 0.039 | p.P714L           |
| 193 | 41 | <i>MAPK3</i>     | 5595      | 16 | 30129057  | Missense        | C         | T     | 0.059 | p.E237K           |
| 194 | 41 | <i>DDX3X</i>     | 1654      | X  | 41205827  | Frame_Shift_Del | GAA       | G     | 0.228 | p.E507fs          |
| 195 | 41 | <i>UGT2B4</i>    | 7363      | 4  | 70346452  | Missense        | A         | G     | 0.248 | p.F496S           |
| 196 | 41 | <i>CSMD2</i>     | 114784    | 1  | 34630649  | Missense        | C         | T     | 0.2   | p.G17E            |
| 197 | 41 | <i>TP53</i>      | 7157      | 17 | 7578217   | Missense        | G         | A     | 0.351 | p.T79I            |
| 198 | 41 | <i>ZNF540</i>    | 163255    | 19 | 38103907  | Missense        | G         | A     | 0.154 | p.V544I           |
| 199 | 41 | <i>DDX3X</i>     | 1654      | X  | 41205833  | Nonsense        | T         | TCGTA | 0.239 | Y509_V510delinsSX |
| 200 | 41 | <i>STAT3</i>     | 6774      | 17 | 40474482  | Missense        | T         | A     | 0.263 | p.Y640F           |
| 201 | 41 | <i>DNAH5</i>     | 1767      | 5  | 13814713  | Splice_Site     | C         | G     | 0.571 | c.7230+1G>C       |
| 202 | 43 | <i>CSMD3</i>     | 114788    | 8  | 113246646 | Missense        | G         | A     | 0.063 | p.A3394V          |
| 203 | 43 | <i>SUPT20HL1</i> | 100130302 | X  | 24382339  | Missense        | C         | T     | 0.091 | p.P488S           |
| 204 | 43 | <i>PCDH15</i>    | 65217     | 10 | 55779984  | Missense        | G         | C     | 0.064 | p.P836A           |
| 205 | 45 | <i>ACAN</i>      | 176       | 15 | 89401424  | Missense        | G         | T     | 0.25  | p.G1870W          |
| 206 | 45 | <i>MSN</i>       | 4478      | X  | 64949397  | Frame_Shift_Del | TC        | T     | 0.554 | p.I97fs           |
| 207 | 45 | <i>ZFH3</i>      | 463       | 16 | 72828800  | Missense        | G         | A     | 0.032 | p.P1680L          |
| 208 | 46 | <i>ARID1A</i>    | 8289      | 1  | 27100181  | In_Frame_Del    | GCAGCAGC. | C     | 0.024 | p.1326_1329del    |
| 209 | 46 | <i>DVL3</i>      | 1857      | 3  | 183887884 | Missense        | C         | T     | 0.143 | p.A530V           |
| 210 | 46 | <i>DNAH11</i>    | 8701      | 7  | 21723558  | Missense        | G         | T     | 0.23  | p.D1873Y          |
| 211 | 46 | <i>PTPRF</i>     | 5792      | 1  | 44063502  | Missense        | G         | A     | 0.045 | p.D633N           |
| 212 | 46 | <i>STAT3</i>     | 6774      | 17 | 40474420  | Missense        | C         | A     | 0.358 | p.D661Y           |
| 213 | 46 | <i>ZSCAN22</i>   | 342945    | 19 | 58850346  | Missense        | A         | G     | 0.087 | p.E377G           |
| 214 | 46 | <i>ARID3A</i>    | 1820      | 19 | 968489    | Missense        | G         | A     | 0.046 | p.G527D           |
| 215 | 46 | <i>MSN</i>       | 4478      | X  | 64959733  | Missense        | T         | G     | 0.486 | p.I571S           |
| 216 | 46 | <i>ARHGAP15</i>  | 22899     | 17 | 8215701   | Missense        | G         | A     | 0.041 | p.R115Q           |
| 217 | 46 | <i>FAT3</i>      | 120114    | 11 | 92577287  | Missense        | C         | T     | 0.188 | p.T3585I          |
| 218 | 47 | <i>MSN</i>       | 4478      | X  | 64953130  | Frame_Shift_Del | CA        | C     | 0.285 | p.K262fs          |
| 219 | 47 | <i>DNAH17</i>    | 8632      | 17 | 76499048  | Missense        | G         | T     | 0.116 | p.L1668I          |
| 220 | 48 | <i>FRMPD3</i>    | 84443     | X  | 106846340 | Missense        | G         | T     | 0.333 | p.A1724S          |
| 221 | 48 | <i>KMT2D</i>     | 8085      | 12 | 49433620  | Nonsense        | G         | A     | 0.242 | p.R2645X          |
| 222 | 48 | <i>C9orf43</i>   | 257169    | 9  | 116187701 | Splice_Site     | G         | A     | 0.167 | c.942+1G>A        |
| 223 | 48 | <i>HDAC4</i>     | 9759      | 2  | 240055940 | Splice_Site     | C         | G     | 0.162 | c.1294+1G>C       |



|     |    |          |        |    |           |                 |           |           |       |                 |
|-----|----|----------|--------|----|-----------|-----------------|-----------|-----------|-------|-----------------|
| 224 | 50 | DACHI    | 1602   | 13 | 72440556  | Missense        | C         | T         | 0.667 | p.G118S         |
| 225 | 50 | FRY      | 10129  | 13 | 32768341  | Missense        | A         | T         | 0.043 | p.N1218I        |
| 226 | 50 | NOTCH1   | 4851   | 9  | 139391014 | Missense        | G         | C         | 0.15  | p.Q2393E        |
| 227 | 51 | RUNX2    | 860    | 6  | 45390486  | In_Frame_Del    | GCGGCGGCC | A         | 0.635 | p.58_64del      |
| 228 | 51 | DICER1   | 23405  | 14 | 95599687  | Nonsense        | T         | A         | 0.389 | p.E37X          |
| 229 | 51 | MSN      | 4478   | X  | 64959744  | Missense        | G         | A         | 0.426 | p.E575K         |
| 230 | 51 | MICU3    | 286097 | 8  | 16884984  | Missense        | G         | C         | 0.5   | p.E66Q          |
| 231 | 51 | STAT3    | 6774   | 17 | 40475058  | Missense        | C         | G         | 0.466 | p.G618R         |
| 232 | 51 | CSMD1    | 64478  | 8  | 3008996   | Missense        | A         | T         | 0.033 | p.I1985N        |
| 233 | 51 | ZNF624   | 57547  | 17 | 16527226  | Frame_Shift_Ins | A         | AT        | 0.313 | p.I325fs        |
| 234 | 51 | FOXF1    | 2294   | 16 | 86544375  | Missense        | A         | C         | 0.167 | p.K67T          |
| 235 | 51 | PTPN13   | 5783   | 4  | 87687597  | Missense        | T         | C         | 0.519 | p.L1228P        |
| 236 | 51 | FGFR4    | 2264   | 5  | 176523107 | Missense        | A         | C         | 0.469 | p.N584T         |
| 237 | 51 | TP53     | 7157   | 17 | 7577106   | Missense        | G         | A         | 0.41  | p.P146S         |
| 238 | 51 | NOTCH2NL | 388677 | 1  | 145273228 | Missense        | C         | A         | 0.061 | p.P28T          |
| 239 | 51 | THAP11   | 57215  | 16 | 67876814  | In_Frame_Ins    | G         | GCAA      | 0.397 | p.Q119delinsQQ  |
| 240 | 51 | HRNR     | 388697 | 1  | 152186699 | Missense        | T         | A         | 0.106 | p.Q2469L        |
| 241 | 51 | TBP      | 6908   | 6  | 170871031 | In_Frame_Ins    | G         | CAACAGC^  | 0.389 | p.Q49delinsQQQQ |
| 242 | 51 | TBP      | 6908   | 6  | 170871073 | In_Frame_Ins    | G         | CAACAGC^  | 0.457 | p.Q63delinsQQQQ |
| 243 | 51 | ABCA4    | 24     | 1  | 94466425  | Missense        | C         | T         | 0.091 | p.R2149Q        |
| 244 | 51 | CDKN2A   | 1029   | 9  | 21971133  | Missense        | G         | C         | 0.448 | p.R90G          |
| 245 | 51 | SYNE1    | 23345  | 6  | 152563496 | Missense        | T         | C         | 0.68  | p.Y6520C        |
| 246 | 51 | BAGE3    | 85318  | 21 | 11021109  | Splice_Site     | C         | T         | 0.135 | c.1492+1G>A     |
| 247 | 51 | TYK2     | 7297   | 19 | 10469850  | Splice_Site     | C         | A         | 0.5   | c.2175+1G>T     |
| 248 | 54 | LILRB1   | 10859  | 19 | 55144626  | Missense        | A         | G         | 0.063 | p.Y373C         |
| 249 | 57 | KMT2C    | 58508  | 7  | 151893019 | Missense        | C         | T         | 0.077 | p.D1451N        |
| 250 | 60 | ABCA2    | 20     | 9  | 139907742 | Missense        | G         | T         | 0.087 | p.Q1527K        |
| 251 | 61 | MSN      | 4478   | X  | 64953120  | Frame_Shift_Ins | A         | ^GCCCATTT | 0.47  | p.K258fs        |
| 252 | 61 | LRP1B    | 53353  | 2  | 141747230 | Splice_Site     | G         | T         | 0.149 | c.2645-4C>A     |
| 253 | 63 | FZD10    | 11211  | 12 | 130648277 | Missense        | A         | T         | 0.077 | p.I264F         |
| 254 | 63 | GNAQ     | 2776   | 9  | 80537228  | Missense        | T         | G         | 0.068 | p.K57T          |
| 255 | 63 | CDHR5    | 53841  | 11 | 618619    | Missense        | C         | T         | 0.125 | p.S641N         |
| 256 | 63 | ADAM29   | 11086  | 4  | 175898117 | Missense        | G         | A         | 0.19  | p.V481M         |
| 257 | 63 | FZD1     | 8321   | 7  | 90895847  | Missense        | T         | C         | 0.069 | p.V551A         |
| 258 | 63 | HLA-B    | 3106   | 6  | 31323095  | Nonsense        | C         | T         | 0.079 | p.W298X         |
| 259 | 63 | DDX3X    | 1654   | X  | 41206206  | Nonsense        | G         | A         | 0.307 | p.W554X         |
| 260 | 63 | ARID1A   | 8289   | 1  | 27099299  | Splice_Site     | G         | A         | 0.08  | c.3540-4G>A     |
| 261 | 64 | PDGFRB   | 5159   | 5  | 149510198 | Missense        | T         | C         | 0.168 | p.E424G         |
| 262 | 67 | SYNE1    | 23345  | 6  | 152770720 | Missense        | T         | G         | 0.265 | p.K1158T        |
| 263 | 67 | ZNF232   | 7775   | 17 | 5009298   | Missense        | G         | C         | 0.075 | p.P386A         |
| 264 | 67 | GNAQ     | 2776   | 9  | 80537112  | Missense        | T         | A         | 0.182 | p.T96S          |
| 265 | 67 | CSMD3    | 114788 | 8  | 113275867 | Splice_Site     | C         | T         | 0.271 | c.9355+1G>A     |
| 266 | 67 | KMT2D    | 8085   | 12 | 49419964  | Splice_Site     | C         | G         | 0.259 | c.15784+1G>C    |
| 267 | 68 | DDX3X    | 1654   | X  | 41198309  | In_Frame_Ins    | C         | CTAAAAA   | 0.43  | p.H42delinsLKN  |
| 268 | 68 | SYNE1    | 23345  | 6  | 152712562 | Missense        | G         | C         | 0.205 | p.S2625R        |
| 269 | 68 | DDX3X    | 1654   | X  | 41198297  | Frame_Shift_Del | ATATTCTC  | T         | 0.417 | p.Y38fs         |
| 270 | 69 | ARID1A   | 8289   | 1  | 27099101  | Frame_Shift_Ins | A         | AT        | 0.306 | p.I1173fs       |
| 271 | 69 | BCOR     | 54880  | X  | 39934053  | Frame_Shift_Del | ATTGATGT  | A         | 0.429 | p.N180fs        |
| 272 | 69 | MUC6     | 4588   | 11 | 1017948   | Missense        | G         | A         | 0.113 | p.P1618L        |
| 273 | 69 | KMT2D    | 8085   | 12 | 49445525  | Frame_Shift_Ins | T         | TG        | 0.187 | p.P647fs        |
| 274 | 69 | FZD8     | 8325   | 10 | 35928686  | Missense        | G         | A         | 0.2   | p.R558C         |
| 275 | 69 | STAT3    | 6774   | 17 | 40475070  | Missense        | T         | G         | 0.305 | p.S614R         |
| 276 | 70 | RYR2     | 6262   | 1  | 237656342 | Missense        | G         | A         | 0.076 | p.G639E         |
| 277 | 70 | FAT1     | 2195   | 4  | 187554945 | Missense        | T         | G         | 0.066 | p.K1406Q        |
| 278 | 70 | CSMD3    | 114788 | 8  | 113697935 | Missense        | G         | T         | 0.066 | p.P624T         |
| 279 | 70 | DNAH9    | 1770   | 17 | 11593551  | Missense        | T         | G         | 0.167 | p.V1471G        |
| 280 | 72 | SETD2    | 29072  | 3  | 47125218  | In_Frame_Del    | CAACTGTCC | C         | 0.354 | p.2012_2017del  |
| 281 | 72 | PTPRD    | 5789   | 9  | 8528666   | Missense        | C         | T         | 0.385 | p.E156K         |
| 282 | 72 | SETD2    | 29072  | 3  | 47103738  | Nonsense        | G         | A         | 0.417 | p.Q2070X        |
| 283 | 72 | CSMD1    | 64478  | 8  | 3076824   | Missense        | C         | T         | 0.405 | p.R1542Q        |
| 284 | 72 | ZNF80    | 7634   | 3  | 113955221 | Missense        | C         | T         | 0.091 | p.R234Q         |
| 285 | 72 | ZNF3     | 7551   | 7  | 99668869  | Missense        | C         | T         | 0.143 | p.R377H         |
| 286 | 76 | ZNF569   | 148266 | 19 | 37904820  | Missense        | C         | T         | 0.091 | p.C247Y         |
| 287 | 76 | MSN      | 4478   | X  | 64951751  | Frame_Shift_Del | TG        | T         | 0.741 | p.G202fs        |
| 288 | 76 | GRIN2B   | 2904   | 12 | 13761758  | Missense        | C         | T         | 0.08  | p.G597R         |
| 289 | 76 | RYR1     | 6261   | 19 | 39025431  | Missense        | G         | A         | 0.118 | p.M3772I        |
| 290 | 76 | BAl1     | 575    | 8  | 143546345 | Splice_Site     | T         | C         | 0.051 | c.784+2T>C      |
| 291 | 81 | JAK1     | 3716   | 1  | 65301158  | Missense        | C         | T         | 0.33  | p.G1097D        |
| 292 | 81 | LRP1B    | 53353  | 2  | 141356340 | Missense        | T         | G         | 0.156 | p.K2352Q        |
| 293 | 81 | DDX3X    | 1654   | X  | 41205617  | Missense        | T         | G         | 0.174 | p.L468R         |
| 294 | 81 | ERBB2    | 2064   | 17 | 37866383  | Missense        | C         | A         | 0.088 | p.P230T         |
| 295 | 81 | KMT2B    | 9757   | 19 | 36224565  | Missense        | C         | T         | 0.4   | p.P2343S        |
| 296 | 81 | SYNE1    | 23345  | 6  | 152720850 | Missense        | G         | A         | 0.142 | p.R2387C        |
| 297 | 86 | SOC3     | 9021   | 17 | 76355068  | Missense        | C         | T         | 0.034 | p.A37T          |
| 298 | 86 | JAK3     | 3718   | 19 | 17948006  | Missense        | G         | A         | 0.45  | p.A573V         |
| 299 | 86 | CLCN1    | 1180   | 7  | 143018557 | Missense        | T         | C         | 0.125 | p.F178S         |

|     |     |                 |        |    |           |                 |           |          |       |                   |
|-----|-----|-----------------|--------|----|-----------|-----------------|-----------|----------|-------|-------------------|
| 300 | 86  | <i>CDH3</i>     | 1001   | 16 | 68712749  | Missense        | C         | T        | 0.378 | p.H211Y           |
| 301 | 86  | <i>JAK1</i>     | 3716   | 1  | 65312362  | Missense        | G         | A        | 0.118 | p.L653F           |
| 302 | 86  | <i>ZNF432</i>   | 9668   | 19 | 52537272  | Missense        | G         | A        | 0.125 | p.R554C           |
| 303 | 86  | <i>BCOR</i>     | 54880  | X  | 39932398  | Frame_Shift_Del | GGCGT     | G        | 0.817 | p.T733fs          |
| 304 | 90  | <i>YEATS2</i>   | 55689  | 3  | 183493733 | Missense        | G         | A        | 0.333 | p.G800E           |
| 305 | 90  | <i>KALRN</i>    | 8997   | 3  | 124237269 | Nonsense        | G         | A        | 0.027 | p.W1651X          |
| 306 | 91  | <i>DDX3X</i>    | 1654   | X  | 41201996  | Frame_Shift_Del | CTT       | C        | 0.174 | p.F135fs          |
| 307 | 91  | <i>FZD7</i>     | 8324   | 2  | 202901079 | Missense        | G         | T        | 0.08  | p.G570V           |
| 308 | 91  | <i>CSMD1</i>    | 64478  | 8  | 2823398   | Missense        | C         | T        | 0.062 | p.S3060N          |
| 309 | 94  | <i>ZNF432</i>   | 9668   | 19 | 52537964  | Missense        | C         | G        | 0.186 | p.G323A           |
| 310 | 94  | <i>UGT2B11</i>  | 10720  | 4  | 70066294  | Missense        | C         | A        | 0.148 | p.W485L           |
| 311 | 97  | <i>KMT2D</i>    | 8085   | 12 | 49426141  | Frame_Shift_Del | TG        | T        | 0.329 | p.H4116fs         |
| 312 | 97  | <i>TP53</i>     | 7157   | 17 | 7579415   | Nonsense        | C         | T        | 0.372 | p.W52X            |
| 313 | 97  | <i>CSMD2</i>    | 114784 | 1  | 34006729  | Splice_Site     | C         | A        | 0.04  | c.9457+1G>T       |
| 314 | 97  | <i>GPR125</i>   | 166647 | 4  | 22414802  | Splice_Site     | T         | C        | 0.25  | c.2232+3A>G       |
| 315 | 98  | <i>HLA-A</i>    | 3105   | 6  | 29911899  | Frame_Shift_Ins | A         | AC       | 0.162 | p.D207fs          |
| 316 | 100 | <i>DDX3X</i>    | 1654   | X  | 41206117  | Missense        | G         | A        | 0.351 | p.A525T           |
| 317 | 100 | <i>GRM8</i>     | 2918   | 7  | 126173128 | Missense        | T         | G        | 0.5   | p.T770P           |
| 318 | 102 | <i>LRP1B</i>    | 53353  | 2  | 141773389 | Missense        | A         | C        | 0.036 | p.F689C           |
| 319 | 102 | <i>CSMD3</i>    | 114788 | 8  | 113317034 | Missense        | C         | T        | 0.181 | p.G2728S          |
| 320 | 102 | <i>ZNF805</i>   | 390980 | 19 | 57765153  | Missense        | A         | C        | 0.062 | p.K189N           |
| 321 | 102 | <i>MROH2A</i>   | 339766 | 2  | 234704873 | Missense        | A         | C        | 0.204 | p.K392T           |
| 322 | 102 | <i>ACAN</i>     | 176    | 15 | 89400771  | Missense        | T         | G        | 0.037 | p.L1652R          |
| 323 | 102 | <i>KRT76</i>    | 51350  | 12 | 53170504  | Missense        | T         | G        | 0.036 | p.N191T           |
| 324 | 102 | <i>GPR98</i>    | 84059  | 5  | 89990430  | Missense        | A         | C        | 0.035 | p.Q2619H          |
| 325 | 102 | <i>ZSCAN20</i>  | 7579   | 1  | 33960132  | Nonsense        | C         | T        | 0.075 | p.R730X           |
| 326 | 102 | <i>ZNF184</i>   | 7738   | 6  | 27419963  | Missense        | A         | T        | 0.095 | p.S459T           |
| 327 | 102 | <i>SYNE1</i>    | 23345  | 6  | 152647624 | Missense        | T         | C        | 0.177 | p.S4963G          |
| 328 | 102 | <i>STAT3</i>    | 6774   | 17 | 40475068  | Missense        | G         | C        | 0.307 | p.S614R           |
| 329 | 102 | <i>EP300</i>    | 2033   | 22 | 41553188  | Missense        | G         | C        | 0.209 | p.V1093L          |
| 330 | 102 | <i>SYNE1</i>    | 23345  | 6  | 152647089 | Splice_Site     | T         | A        | 0.028 | c.15225+4A>T      |
| 331 | 104 | <i>NRXN1</i>    | 9378   | 2  | 50463934  | Missense        | A         | T        | 0.056 | p.L145Q           |
| 332 | 104 | <i>ZNF7</i>     | 7553   | 8  | 146067666 | Missense        | C         | A        | 0.125 | p.L296I           |
| 333 | 104 | <i>FOXP2</i>    | 93986  | 7  | 114271582 | Splice_Site     | G         | C        | 0.182 | c.598-4G>C        |
| 334 | 105 | <i>TET2</i>     | 54790  | 4  | 106197248 | Missense        | G         | A        | 0.16  | p.G1861R          |
| 335 | 105 | <i>ACAN</i>     | 176    | 15 | 89402028  | Missense        | G         | A        | 0.183 | p.G2071E          |
| 336 | 105 | <i>KRT73</i>    | 319101 | 12 | 53004551  | Missense        | C         | A        | 0.167 | p.R393S           |
| 337 | 105 | <i>SH3RF2</i>   | 153769 | 5  | 145317703 | Missense        | G         | A        | 0.202 | p.R71H            |
| 338 | 105 | <i>FAT4</i>     | 79633  | 4  | 126369618 | Missense        | T         | A        | 0.18  | p.S2483T          |
| 339 | 105 | <i>STAT3</i>    | 6774   | 17 | 40475068  | Missense        | G         | T        | 0.177 | p.S614R           |
| 340 | 105 | <i>PCDH15</i>   | 65217  | 10 | 55782668  | Missense        | G         | T        | 0.188 | p.T766N           |
| 341 | 107 | <i>CDHR5</i>    | 53841  | 11 | 618988    | Missense        | G         | A        | 0.087 | p.A518V           |
| 342 | 107 | <i>KMT2C</i>    | 58508  | 7  | 151935811 | Missense        | G         | A        | 0.071 | p.A878V           |
| 343 | 107 | <i>DSPP</i>     | 1834   | 4  | 88535832  | In_Frame_Ins    | A         | .GTGACAG | 0.409 | ∆673delinsDSSDSSS |
| 344 | 107 | <i>CSMD2</i>    | 114784 | 1  | 33985509  | Missense        | G         | C        | 0.357 | p.H3403D          |
| 345 | 107 | <i>BAI1</i>     | 575    | 8  | 143566085 | Missense        | G         | C        | 0.362 | p.M756I           |
| 346 | 107 | <i>TP53</i>     | 7157   | 17 | 7579416   | Frame_Shift_Del | GGAGGGGGC | A        | 0.549 | p.P48fs           |
| 347 | 107 | <i>PTPN21</i>   | 11099  | 14 | 88935394  | Nonsense        | G         | A        | 0.29  | p.R1088X          |
| 348 | 107 | <i>KRT7</i>     | 3855   | 12 | 52639415  | Missense        | C         | T        | 0.36  | p.R402W           |
| 349 | 107 | <i>NCKAP5</i>   | 344148 | 2  | 133887622 | Missense        | C         | T        | 0.301 | p.R90Q            |
| 350 | 107 | <i>IL7R</i>     | 3575   | 5  | 35876286  | Missense        | A         | G        | 0.467 | p.S360G           |
| 351 | 107 | <i>ACAN</i>     | 176    | 15 | 89401916  | Missense        | G         | T        | 0.367 | p.V2034F          |
| 352 | 107 | <i>FAT1</i>     | 2195   | 4  | 187539780 | Missense        | C         | T        | 0.508 | p.V2654I          |
| 353 | 107 | <i>ACAN</i>     | 176    | 15 | 89398757  | Missense        | G         | A        | 0.401 | p.V981I           |
| 354 | 109 | <i>FAT1</i>     | 2195   | 4  | 187628916 | Missense        | T         | C        | 0.225 | p.Q689R           |
| 355 | 109 | <i>KIF2B</i>    | 84643  | 17 | 51901323  | Missense        | C         | T        | 0.2   | p.T310M           |
| 356 | 110 | <i>ATRX</i>     | 546    | X  | 76764089  | Nonsense        | G         | A        | 0.916 | p.R2369X          |
| 357 | 110 | <i>KMT2D</i>    | 8085   | 12 | 49434909  | Nonsense        | G         | T        | 0.493 | p.S2215X          |
| 358 | 110 | <i>CSMD1</i>    | 64478  | 8  | 3474295   | Missense        | A         | T        | 0.89  | p.V345D           |
| 359 | 111 | <i>STAT3</i>    | 6774   | 17 | 40474420  | Missense        | C         | A        | 0.067 | p.D661Y           |
| 360 | 112 | <i>SYNE1</i>    | 23345  | 6  | 152646306 | Missense        | C         | G        | 0.323 | p.Q5119H          |
| 361 | 113 | <i>PTPN13</i>   | 5783   | 4  | 87696369  | Missense        | A         | G        | 0.026 | p.N1661D          |
| 362 | 114 | <i>CSMD3</i>    | 114788 | 8  | 113933949 | Missense        | C         | T        | 0.044 | p.E410K           |
| 363 | 114 | <i>FAT1</i>     | 2195   | 4  | 187540421 | Missense        | A         | T        | 0.321 | p.I2440N          |
| 364 | 114 | <i>BRCAl</i>    | 672    | 17 | 41256207  | Missense        | T         | A        | 0.057 | p.I78F            |
| 365 | 114 | <i>ARHGAP22</i> | 58504  | 10 | 49791002  | Missense        | G         | A        | 0.286 | p.P77L            |
| 366 | 115 | <i>RHOA</i>     | 387    | 3  | 49412973  | Missense        | C         | A        | 0.196 | p.G17V            |
| 367 | 115 | <i>GNAQ</i>     | 2776   | 9  | 80537112  | Missense        | T         | A        | 0.164 | p.T96S            |
| 368 | 118 | <i>LRP1B</i>    | 53353  | 2  | 141459812 | Missense        | A         | T        | 0.118 | p.I2067N          |
| 369 | 118 | <i>KALRN</i>    | 8997   | 3  | 124160810 | Missense        | C         | T        | 0.088 | p.R1071W          |
| 370 | 118 | <i>PAK2</i>     | 5062   | 3  | 196537469 | Missense        | G         | A        | 0.108 | p.V240M           |
| 371 | 118 | <i>ARID1A</i>   | 8289   | 1  | 27100390  | Splice_Site     | G         | T        | 0.121 | c.4101+1G>T       |
| 372 | 120 | <i>KALRN</i>    | 8997   | 3  | 124044872 | Missense        | C         | A        | 0.443 | p.L378I           |
| 373 | 120 | <i>KALRN</i>    | 8997   | 3  | 124153157 | Missense        | C         | A        | 0.47  | p.L943I           |
| 374 | 120 | <i>KRT6A</i>    | 3853   | 12 | 52884718  | Missense        | A         | G        | 0.556 | p.M279T           |
| 375 | 120 | <i>JAK3</i>     | 3718   | 19 | 17945969  | Missense        | C         | T        | 0.058 | p.R657Q           |

|     |     |               |      |    |           |          |   |   |       |          |
|-----|-----|---------------|------|----|-----------|----------|---|---|-------|----------|
| 376 | 120 | <i>JAK3</i>   | 3718 | 19 | 17945970  | Missense | G | A | 0.153 | p.R657W  |
| 377 | 120 | <i>JAK1</i>   | 3716 | 1  | 65311203  | Missense | C | A | 0.227 | p.S703I  |
| 378 | 120 | <i>FAT1</i>   | 2195 | 4  | 187539143 | Missense | G | C | 0.073 | p.T2866R |
| 379 | 120 | <i>DNAH11</i> | 8701 | 7  | 21939024  | Missense | G | A | 0.876 | p.V4374M |
| 380 | 121 | <i>ARID1A</i> | 8289 | 1  | 27094347  | Nonsense | G | T | 0.265 | p.E1019X |
| 381 | 121 | <i>DDX3X</i>  | 1654 | X  | 41206199  | Missense | C | T | 0.499 | p.P552L  |

\*Based on NCBI human reference genome GRC Build 37 (hg19).

Supplementary Table 8. List of non-silent mutations identified by whole exome sequencing of 26 cases of NKTCL without the matched normal tissue.

| Patient ID | Hugo Symbol      | Entrez Gene Id | Chromosome | Position* | Variant Classification | Reference Allele | Tumor Allele | Variant allele frequency | Protein Change |
|------------|------------------|----------------|------------|-----------|------------------------|------------------|--------------|--------------------------|----------------|
| 143        | <i>COMMD10</i>   | 16144          | 5          | 115426870 | stopgain               | C                | A            | 0.158                    | p.S76X         |
| 143        | <i>TAS2R38</i>   | 176817         | 7          | 141672829 | stopgain               | C                | A            | 0.053                    | p.G221X        |
| 143        | <i>CRYL1</i>     | 15974          | 13         | 21086613  | stopgain               | G                | A            | 0.174                    | p.Q40X         |
| 143        | <i>WDR89</i>     | 80666          | 14         | 64066363  | stopgain               | G                | A            | 0.094                    | p.R100X        |
| 143        | <i>PGD</i>       | 2631           | 1          | 10478930  | missense               | T                | C            | 0.102                    | p.L386P        |
| 143        | <i>KLF17</i>     | 173484         | 1          | 44595602  | missense               | T                | G            | 0.062                    | p.L220R        |
| 143        | <i>KLF17</i>     | 173484         | 1          | 44595614  | missense               | C                | G            | 0.076                    | p.P224R        |
| 143        | <i>FLG2</i>      | 1014342        | 1          | 152323534 | missense               | C                | G            | 0.089                    | p.R2243T       |
| 143        | <i>PTPN14</i>    | 5401           | 1          | 214556970 | missense               | C                | T            | 0.087                    | p.R743H        |
| 143        | <i>HK2</i>       | 189            | 2          | 75099527  | missense               | A                | G            | 0.074                    | p.H159R        |
| 143        | <i>SNRNP200</i>  | 14014          | 2          | 96942874  | missense               | G                | A            | 0.074                    | p.R2013C       |
| 143        | <i>FER1L5</i>    | 1293083        | 2          | 97365288  | missense               | A                | G            | 0.231                    | p.M1538V       |
| 143        | <i>SCN9A</i>     | 2977           | 2          | 167055838 | missense               | T                | C            | 0.091                    | p.T1760A       |
| 143        | <i>SCN9A</i>     | 2977           | 2          | 167056123 | missense               | T                | C            | 0.114                    | p.N1665D       |
| 143        | <i>SCN9A</i>     | 2977           | 2          | 167143021 | missense               | C                | G            | 0.068                    | p.R476T        |
| 143        | <i>ZNF804A</i>   | 194250         | 2          | 185802216 | missense               | T                | C            | 0.061                    | p.I698T        |
| 143        | <i>ERBB4</i>     | 5235           | 2          | 212566763 | missense               | T                | A            | 0.198                    | p.N473I        |
| 143        | <i>UGT1A1</i>    | 463            | 2          | 234669360 | missense               | A                | G            | 0.063                    | p.S143G        |
| 143        | <i>MTMR14</i>    | 22485          | 3          | 9704010   | missense               | C                | T            | 0.060                    | p.A123V        |
| 143        | <i>ZNF502</i>    | 33210          | 3          | 44763301  | missense               | C                | T            | 0.133                    | p.T331I        |
| 143        | <i>ZNF717</i>    | 1290209        | 3          | 75788230  | missense               | C                | T            | 0.080                    | p.V132I        |
| 143        | <i>IGF2BP2</i>   | 6548           | 3          | 185407149 | missense               | T                | C            | 0.078                    | p.Q224R        |
| 143        | <i>IGF2BP2</i>   | 6548           | 3          | 185407152 | missense               | G                | C            | 0.080                    | p.T223S        |
| 143        | <i>RTP1</i>      | 153708         | 3          | 186917701 | missense               | C                | T            | 0.114                    | p.A212V        |
| 143        | <i>BMP2K</i>     | 198892         | 4          | 79833077  | missense               | G                | A            | 0.051                    | p.V1126M       |
| 143        | <i>GK2</i>       | 33214          | 4          | 80328969  | missense               | T                | C            | 0.064                    | p.K129R        |
| 143        | <i>GK2</i>       | 33214          | 4          | 80329048  | missense               | A                | T            | 0.080                    | p.L103I        |
| 143        | <i>WDFY3</i>     | 14991          | 4          | 85623612  | missense               | C                | A            | 0.175                    | p.E2830D       |
| 143        | <i>OSTC</i>      | 21227          | 4          | 109571947 | missense               | G                | A            | 0.061                    | p.G46R         |
| 143        | <i>PCDH18</i>    | 19035          | 4          | 138452598 | missense               | C                | A            | 0.160                    | p.Q215H        |
| 143        | <i>SCOC</i>      | 1153663        | 4          | 141294788 | missense               | G                | A            | 0.051                    | p.R33Q         |
| 143        | <i>ANP32C</i>    | 12403          | 4          | 165118838 | missense               | G                | A            | 0.087                    | p.S9L          |
| 143        | <i>PRDM9</i>     | 20227          | 5          | 23521243  | missense               | T                | C            | 0.143                    | p.S155P        |
| 143        | <i>KCNN2</i>     | 170775         | 5          | 113822755 | missense               | T                | A            | 0.190                    | p.N421K        |
| 143        | <i>ZNF354B</i>   | 58230          | 5          | 178310417 | missense               | C                | G            | 0.255                    | p.Q322E        |
| 143        | <i>OR2V2</i>     | 206880         | 5          | 180582175 | missense               | A                | T            | 0.085                    | p.N78I         |
| 143        | <i>ERVFRD-1</i>  | 207582         | 6          | 11105377  | missense               | G                | C            | 0.055                    | p.T56R         |
| 143        | <i>FAM8A1</i>    | 16255          | 6          | 17601058  | missense               | G                | A            | 0.100                    | p.A140T        |
| 143        | <i>MUC22</i>     | 1198815        | 6          | 30995913  | missense               | A                | G            | 0.057                    | p.D902G        |
| 143        | <i>HLA-DQA2</i>  | 20056          | 6          | 32713061  | missense               | C                | A            | 0.054                    | p.Q70K         |
| 143        | <i>COL21A1</i>   | 30820          | 6          | 56035470  | missense               | T                | C            | 0.129                    | p.T335A        |
| 143        | <i>KHDC3L</i>    | 1017361        | 6          | 74073534  | missense               | T                | G            | 0.116                    | p.V202G        |
| 143        | <i>DOPEY1</i>    | 15018          | 6          | 83861669  | missense               | G                | T            | 0.061                    | p.W1991L       |
| 143        | <i>TRMT11</i>    | 1031712        | 6          | 126314922 | missense               | T                | C            | 0.067                    | p.L31S         |
| 143        | <i>TRMT11</i>    | 1031712        | 6          | 126314924 | missense               | C                | T            | 0.066                    | p.L32F         |
| 143        | <i>PCMT1</i>     | 5389           | 6          | 150123436 | missense               | G                | A            | 0.074                    | p.S260N        |
| 143        | <i>ARID1B</i>    | 20732          | 6          | 157528640 | missense               | G                | A            | 0.057                    | p.R2122H       |
| 143        | <i>PDCC2</i>     | 2598           | 6          | 170886760 | missense               | T                | C            | 0.066                    | p.K275E        |
| 143        | <i>SEMA3C</i>    | 6379           | 7          | 80374575  | missense               | G                | A            | 0.125                    | p.R631C        |
| 143        | <i>ZNF635</i>    | 138494         | 7          | 99170128  | missense               | G                | A            | 0.055                    | p.E168K        |
| 143        | <i>CYP3A4</i>    | 17460          | 7          | 99377697  | missense               | T                | C            | 0.095                    | p.H28R         |
| 143        | <i>PILRB</i>     | 178238         | 7          | 99956664  | missense               | T                | G            | 0.050                    | p.L139W        |
| 143        | <i>MUC17</i>     | 1040105        | 7          | 100675860 | missense               | T                | C            | 0.111                    | p.L388P        |
| 143        | <i>MUC17</i>     | 1040105        | 7          | 100676193 | missense               | A                | C            | 0.119                    | p.N499T        |
| 143        | <i>PLXNA4</i>    | 1105543        | 7          | 132069952 | missense               | T                | C            | 0.070                    | p.N492D        |
| 143        | <i>TNFRSF11B</i> | 2546           | 8          | 119945254 | missense               | C                | T            | 0.085                    | p.E106K        |
| 143        | <i>IFNA14</i>    | 2172           | 9          | 21239862  | missense               | T                | C            | 0.052                    | p.N25D         |
| 143        | <i>CLTA</i>      | 7096           | 9          | 36198985  | missense               | G                | A            | 0.114                    | p.G89S         |
| 143        | <i>C9orf3</i>    | 32823          | 9          | 97522094  | missense               | A                | G            | 0.198                    | p.D10G         |
| 143        | <i>MSANTD3</i>   | 80655          | 9          | 103204567 | missense               | C                | T            | 0.093                    | p.P116L        |
| 143        | <i>TTF1</i>      | 7344           | 9          | 135276911 | missense               | A                | G            | 0.061                    | p.V433A        |
| 143        | <i>PPP1R26</i>   | 14811          | 9          | 138378056 | missense               | T                | C            | 0.083                    | p.L567S        |
| 143        | <i>TAF3</i>      | 31923          | 10         | 8006041   | missense               | C                | T            | 0.062                    | p.P190S        |
| 143        | <i>ANKRD30A</i>  | 52997          | 10         | 37508293  | missense               | G                | A            | 0.050                    | p.S1162N       |
| 143        | <i>ZNF37A</i>    | 3421           | 10         | 38406445  | missense               | A                | C            | 0.051                    | p.K122N        |
| 143        | <i>PGBD3</i>     | 170753         | 10         | 50724379  | missense               | A                | G            | 0.055                    | p.V729A        |
| 143        | <i>FGFR2</i>     | 23029          | 10         | 123244979 | missense               | C                | T            | 0.191                    | p.V710M        |
| 143        | <i>MKI67</i>     | 2417           | 10         | 129904259 | missense               | T                | G            | 0.063                    | p.K1949Q       |
| 143        | <i>MKI67</i>     | 2417           | 10         | 129904459 | missense               | T                | C            | 0.057                    | p.K1882R       |
| 143        | <i>OR52E2</i>    | 1005164        | 11         | 5080686   | missense               | G                | A            | 0.067                    | p.H58Y         |
| 143        | <i>OR10A4</i>    | 207186         | 11         | 6898219   | missense               | G                | T            | 0.074                    | p.C114F        |
| 143        | <i>MRGPRX3</i>   | 54031          | 11         | 18158756  | missense               | T                | C            | 0.071                    | p.S3P          |
| 143        | <i>TBBD18</i>    | 1145101        | 11         | 57512683  | missense               | C                | A            | 0.095                    | p.Q354H        |
| 143        | <i>GLYATL1</i>   | 80661          | 11         | 58722687  | missense               | A                | G            | 0.116                    | p.T118A        |
| 143        | <i>GLYATL1</i>   | 80661          | 11         | 58722698  | missense               | G                | T            | 0.074                    | p.K121N        |
| 143        | <i>CLPB</i>      | 30813          | 11         | 72005110  | missense               | C                | T            | 0.085                    | p.D566N        |
| 143        | <i>FKBP4</i>     | 2014           | 12         | 2909698   | missense               | T                | G            | 0.138                    | p.H329Q        |

|     |                |         |    |           |          |   |   |       |          |
|-----|----------------|---------|----|-----------|----------|---|---|-------|----------|
| 143 | <i>DDX23</i>   | 4818    | 12 | 49239496  | missense | G | A | 0.077 | p.R24W   |
| 143 | <i>GALNT6</i>  | 7210    | 12 | 51773129  | missense | G | A | 0.063 | p.A146V  |
| 143 | <i>CTDSP2</i>  | 5730    | 12 | 58217698  | missense | G | T | 0.136 | p.P227T  |
| 143 | <i>CTDSP2</i>  | 5730    | 12 | 58217770  | missense | G | C | 0.133 | p.L203V  |
| 143 | <i>CTDSP2</i>  | 5730    | 12 | 58220811  | missense | G | T | 0.171 | p.L108I  |
| 143 | <i>CTDSP2</i>  | 5730    | 12 | 58220819  | missense | A | G | 0.081 | p.V105A  |
| 143 | <i>CTDSP2</i>  | 5730    | 12 | 58220831  | missense | C | A | 0.156 | p.R101M  |
| 143 | <i>TSPAN19</i> | 1100917 | 12 | 85408282  | missense | A | T | 0.126 | p.I244N  |
| 143 | <i>RPL10L</i>  | 80746   | 14 | 47120818  | missense | G | A | 0.050 | p.A41V   |
| 143 | <i>PPP2R5E</i> | 6246    | 14 | 63863387  | missense | T | A | 0.063 | p.L199F  |
| 143 | <i>WDR89</i>   | 80666   | 14 | 64066352  | missense | T | A | 0.069 | p.R103S  |
| 143 | <i>WDR89</i>   | 80666   | 14 | 64066367  | missense | A | T | 0.085 | p.D98E   |
| 143 | <i>WDR89</i>   | 80666   | 14 | 64066395  | missense | C | T | 0.099 | p.C89Y   |
| 143 | <i>WDR89</i>   | 80666   | 14 | 64066398  | missense | G | C | 0.102 | p.A88G   |
| 143 | <i>WDR89</i>   | 80666   | 14 | 64066402  | missense | A | G | 0.102 | p.S87P   |
| 143 | <i>TTC7B</i>   | 1010854 | 14 | 91059919  | missense | G | A | 0.111 | p.S673L  |
| 143 | <i>TMEM251</i> | 1098621 | 14 | 93652617  | missense | G | C | 0.050 | p.W37C   |
| 143 | <i>SNURF</i>   | 22804   | 15 | 25207325  | missense | C | T | 0.184 | p.R27C   |
| 143 | <i>USP8</i>    | 5154    | 15 | 50769578  | missense | G | A | 0.080 | p.G367D  |
| 143 | <i>ITGAX</i>   | 1286375 | 16 | 31391603  | missense | G | A | 0.080 | p.G1026D |
| 143 | <i>SALL1</i>   | 2968    | 16 | 51174697  | missense | C | T | 0.052 | p.C479Y  |
| 143 | <i>NOL3</i>    | 3946    | 16 | 67208844  | missense | G | A | 0.053 | p.E268K  |
| 143 | <i>MLYCD</i>   | 12213   | 16 | 83948772  | missense | C | T | 0.085 | p.S387L  |
| 143 | <i>METTL16</i> | 24086   | 17 | 2344798   | missense | G | T | 0.082 | p.L262I  |
| 143 | <i>CTCI</i>    | 25099   | 17 | 8141735   | missense | T | A | 0.169 | p.D137V  |
| 143 | <i>SLFN12L</i> | 1195790 | 17 | 33807072  | missense | G | T | 0.058 | p.Q53K   |
| 143 | <i>MRPL10</i>  | 148887  | 17 | 45901618  | missense | T | C | 0.093 | p.M257V  |
| 143 | <i>COX11</i>   | 4375    | 17 | 53040118  | missense | C | A | 0.070 | p.K269N  |
| 143 | <i>HLF</i>     | 2126    | 17 | 53398112  | missense | G | A | 0.070 | p.A254T  |
| 143 | <i>SLC16A3</i> | 4207    | 17 | 80194643  | missense | C | T | 0.108 | p.R88W   |
| 143 | <i>TCEB3B</i>  | 16427   | 18 | 44559925  | missense | T | C | 0.063 | p.K571E  |
| 143 | <i>TCEB3B</i>  | 16427   | 18 | 44559927  | missense | C | G | 0.106 | p.R570T  |
| 143 | <i>LMNB2</i>   | 32737   | 19 | 2434474   | missense | C | T | 0.093 | p.A341T  |
| 143 | <i>MUC16</i>   | 24690   | 19 | 9066673   | missense | G | C | 0.057 | p.H6925D |
| 143 | <i>GIPCI</i>   | 202494  | 19 | 14591568  | missense | G | C | 0.133 | p.T104S  |
| 143 | <i>WIZ</i>     | 21241   | 19 | 15538007  | missense | G | T | 0.082 | p.S289R  |
| 143 | <i>MAU2</i>    | 15329   | 19 | 19458149  | missense | C | T | 0.078 | p.R428W  |
| 143 | <i>ZNF225</i>  | 13362   | 19 | 44635647  | missense | T | G | 0.059 | p.C294G  |
| 143 | <i>ZNF415</i>  | 18355   | 19 | 53611776  | missense | G | A | 0.127 | p.R508C  |
| 143 | <i>KIR2DL4</i> | 2255    | 19 | 55317499  | missense | T | A | 0.073 | p.F152Y  |
| 143 | <i>SYT5</i>    | 1297774 | 19 | 55686365  | missense | C | A | 0.087 | p.Q237H  |
| 143 | <i>ZBTB45</i>  | 32792   | 19 | 59028871  | missense | A | G | 0.057 | p.F57S   |
| 143 | <i>DZANK1</i>  | 1099407 | 20 | 18377154  | missense | C | T | 0.281 | p.V525I  |
| 143 | <i>MYL9</i>    | 6097    | 20 | 35176580  | missense | C | A | 0.065 | p.F110L  |
| 143 | <i>SALL4</i>   | 20436   | 20 | 50407959  | missense | T | G | 0.085 | p.T355P  |
| 143 | <i>TCP10L</i>  | 144659  | 21 | 33949205  | missense | C | T | 0.056 | p.S176N  |
| 143 | <i>DOPEY2</i>  | 5128    | 21 | 37571465  | missense | T | C | 0.200 | p.V79A   |
| 143 | <i>TTC3</i>    | 3316    | 21 | 38525560  | missense | A | G | 0.056 | p.Q908R  |
| 143 | <i>EIF3L</i>   | 16091   | 22 | 38251604  | missense | A | C | 0.089 | p.N109T  |
| 143 | <i>MXRA5</i>   | 15419   | X  | 3240164   | missense | G | T | 0.070 | p.P1188T |
| 143 | <i>OFD1</i>    | 3611    | X  | 13762624  | missense | A | G | 0.062 | p.N168S  |
| 143 | <i>PIGA</i>    | 2641    | X  | 15349697  | missense | C | T | 0.052 | p.R119Q  |
| 143 | <i>PHEX</i>    | 1282754 | X  | 22108552  | missense | C | G | 0.167 | p.D223E  |
| 143 | <i>FAM104B</i> | 1166703 | X  | 55172521  | missense | G | T | 0.077 | p.T114K  |
| 143 | <i>FAM104B</i> | 138362  | X  | 55172689  | missense | G | T | 0.069 | p.A59E   |
| 143 | <i>TAF1</i>    | 138923  | X  | 70608657  | missense | T | A | 0.132 | p.M879K  |
| 143 | <i>ARMCX4</i>  | 1256155 | X  | 100746250 | missense | T | C | 0.082 | p.S892P  |
| 143 | <i>GLUD2</i>   | 12084   | X  | 120183026 | missense | T | G | 0.075 | p.S496R  |
| 145 | <i>MAP3K6</i>  | 4672    | 1  | 27689342  | stopgain | C | T | 0.062 | p.W381X  |
| 145 | <i>USP34</i>   | 14709   | 2  | 6157773   | stopgain | A | T | 0.095 | p.L436X  |
| 145 | <i>REV1</i>    | 16316   | 2  | 100040723 | stopgain | C | A | 0.078 | p.G523X  |
| 145 | <i>MAP2</i>    | 31847   | 2  | 210574826 | stopgain | G | T | 0.051 | p.E1641X |
| 145 | <i>ZBTB11</i>  | 14415   | 3  | 101390034 | stopgain | G | A | 0.057 | p.R240X  |
| 145 | <i>ENAM</i>    | 31889   | 4  | 71509124  | stopgain | G | T | 0.065 | p.G661X  |
| 145 | <i>Csof42</i>  | 23073   | 5  | 37158435  | stopgain | A | T | 0.069 | p.L2568X |
| 145 | <i>ITGA2</i>   | 2203    | 5  | 52351402  | stopgain | C | T | 0.052 | p.R272X  |
| 145 | <i>NUDT12</i>  | 31438   | 5  | 102894705 | stopgain | A | T | 0.063 | p.L224X  |
| 145 | <i>UQCRCQ</i>  | 14402   | 5  | 132203218 | stopgain | G | T | 0.078 | p.E65X   |
| 145 | <i>CDKL3</i>   | 16508   | 5  | 133702107 | stopgain | A | T | 0.053 | p.Y36X   |
| 145 | <i>SLIT3</i>   | 3062    | 5  | 168233506 | stopgain | G | A | 0.213 | p.R294X  |
| 145 | <i>TBC1D32</i> | 152730  | 6  | 121577283 | stopgain | G | A | 0.085 | p.Q628X  |
| 145 | <i>MTHFD1L</i> | 15440   | 6  | 151286162 | stopgain | C | T | 0.160 | p.Q668X  |
| 145 | <i>RELN</i>    | 173054  | 7  | 103193910 | stopgain | C | A | 0.095 | p.E2024X |
| 145 | <i>CREB3L2</i> | 194071  | 7  | 137613091 | stopgain | C | A | 0.167 | p.E42X   |
| 145 | <i>UNC5D</i>   | 80872   | 8  | 35616959  | stopgain | G | A | 0.051 | p.W762X  |
| 145 | <i>MATN2</i>   | 30583   | 8  | 98991200  | stopgain | G | T | 0.065 | p.G349X  |
| 145 | <i>OXR1</i>    | 181354  | 8  | 107695493 | stopgain | C | T | 0.056 | p.Q124X  |
| 145 | <i>TAF2</i>    | 3184    | 8  | 120795650 | stopgain | T | A | 0.089 | p.R695X  |
| 145 | <i>KCNMA1</i>  | 2247    | 10 | 78799378  | stopgain | C | T | 0.085 | p.W589X  |
| 145 | <i>LRRC27</i>  | 30626   | 10 | 134169349 | stopgain | A | T | 0.061 | p.K377X  |
| 145 | <i>CFAP46</i>  | 1200049 | 10 | 134694433 | stopgain | C | T | 0.146 | p.W1244X |

|     |                 |         |    |           |          |   |   |       |          |
|-----|-----------------|---------|----|-----------|----------|---|---|-------|----------|
| 145 | <i>LMO7</i>     | 15842   | 13 | 76378636  | stopgain | G | A | 0.051 | p.W343X  |
| 145 | <i>SAMD4A</i>   | 15589   | 14 | 55203855  | stopgain | C | T | 0.069 | p.R277X  |
| 145 | <i>ESRRB</i>    | 4452    | 14 | 76948391  | stopgain | C | T | 0.083 | p.Q183X  |
| 145 | <i>CCDC88C</i>  | 1080414 | 14 | 91782119  | stopgain | G | A | 0.087 | p.Q514X  |
| 145 | <i>ASB2</i>     | 16150   | 14 | 94405789  | stopgain | C | A | 0.082 | p.E428X  |
| 145 | <i>CDYL2</i>    | 152342  | 16 | 80718807  | stopgain | G | A | 0.060 | p.R82X   |
| 145 | <i>CEP76</i>    | 24899   | 18 | 12698999  | stopgain | C | A | 0.065 | p.E167X  |
| 145 | <i>COX4I2</i>   | 32609   | 20 | 30231227  | stopgain | G | T | 0.091 | p.E90X   |
| 145 | <i>NDRG3</i>    | 32013   | 20 | 35284799  | stopgain | C | A | 0.098 | p.E304X  |
| 145 | <i>SYAP1</i>    | 32796   | X  | 16754353  | stopgain | C | A | 0.091 | p.S120X  |
| 145 | <i>CXorf36</i>  | 176819  | X  | 45051249  | stopgain | C | T | 0.054 | p.W82X   |
| 145 | <i>PLEKHG5</i>  | 198681  | 1  | 6535118   | missense | C | A | 0.056 | p.K174N  |
| 145 | <i>MTOR</i>     | 4958    | 1  | 11206776  | missense | G | T | 0.077 | p.A1548D |
| 145 | <i>MFN2</i>     | 14874   | 1  | 12058890  | missense | T | A | 0.056 | p.D221E  |
| 145 | <i>VPS13D</i>   | 18156   | 1  | 12320777  | missense | C | G | 0.065 | p.Q380E  |
| 145 | <i>PHC2</i>     | 198040  | 1  | 33836635  | missense | G | A | 0.067 | p.P132S  |
| 145 | <i>CSMD2</i>    | 52896   | 1  | 34180265  | missense | G | A | 0.077 | p.R1070C |
| 145 | <i>MTF1</i>     | 5955    | 1  | 38287942  | missense | C | T | 0.056 | p.A540T  |
| 145 | <i>COL9A2</i>   | 1852    | 1  | 40773405  | missense | C | A | 0.067 | p.K308N  |
| 145 | <i>DNAJC6</i>   | 14787   | 1  | 65852598  | missense | C | T | 0.121 | p.R297W  |
| 145 | <i>WLS</i>      | 24911   | 1  | 68603514  | missense | T | A | 0.058 | p.M489L  |
| 145 | <i>MTF2</i>     | 7358    | 1  | 93575896  | missense | G | A | 0.224 | p.A39T   |
| 145 | <i>DCST2</i>    | 144622  | 1  | 155006054 | missense | G | T | 0.054 | p.L42I   |
| 145 | <i>SLC50A1</i>  | 18845   | 1  | 155109307 | missense | C | A | 0.073 | p.N54K   |
| 145 | <i>OR10J3</i>   | 1004467 | 1  | 159283990 | missense | G | A | 0.074 | p.L154F  |
| 145 | <i>FASLG</i>    | 639     | 1  | 172634851 | missense | C | A | 0.061 | p.L181I  |
| 145 | <i>TNR</i>      | 3285    | 1  | 175362981 | missense | C | T | 0.053 | p.V431M  |
| 145 | <i>SWT1</i>     | 17673   | 1  | 185135752 | missense | A | T | 0.071 | p.I45L   |
| 145 | <i>PRG4</i>     | 5807    | 1  | 186280642 | missense | T | A | 0.060 | p.F1236Y |
| 145 | <i>LHX9</i>     | 20204   | 1  | 197898138 | missense | T | A | 0.057 | p.F306I  |
| 145 | <i>TRAF3IP3</i> | 25228   | 1  | 209936436 | missense | A | T | 0.066 | p.K192M  |
| 145 | <i>KCNHI</i>    | 172362  | 1  | 210970910 | missense | A | G | 0.197 | p.C619R  |
| 145 | <i>RCOR3</i>    | 18254   | 1  | 211449609 | missense | T | C | 0.052 | p.M122T  |
| 145 | <i>CENPF</i>    | 16343   | 1  | 214819387 | missense | C | A | 0.056 | p.N2158K |
| 145 | <i>ARID4B</i>   | 31371   | 1  | 235416097 | missense | A | G | 0.196 | p.L101P  |
| 145 | <i>ERO1LB</i>   | 19891   | 1  | 236445020 | missense | C | A | 0.121 | p.V22F   |
| 145 | <i>ZNF695</i>   | 20394   | 1  | 247162673 | missense | G | A | 0.056 | p.T79I   |
| 145 | <i>BIRC6</i>    | 16252   | 2  | 32740298  | missense | G | A | 0.050 | p.A3604T |
| 145 | <i>SOCS5</i>    | 144949  | 2  | 46986930  | missense | C | A | 0.050 | p.R421S  |
| 145 | <i>USP34</i>    | 14709   | 2  | 61463014  | missense | G | A | 0.074 | p.T2333M |
| 145 | <i>UGP2</i>     | 6759    | 2  | 64112982  | missense | G | T | 0.194 | p.V279F  |
| 145 | <i>10-Sep</i>   | 178584  | 2  | 110325462 | missense | C | T | 0.108 | p.S231N  |
| 145 | <i>BCL2L11</i>  | 207003  | 2  | 111907653 | missense | C | T | 0.066 | p.R83C   |
| 145 | <i>BIN1</i>     | 139351  | 2  | 127826559 | missense | G | A | 0.070 | p.R154W  |
| 145 | <i>FAP</i>      | 4460    | 2  | 163029362 | missense | C | A | 0.056 | p.A714S  |
| 145 | <i>GALNT3</i>   | 4482    | 2  | 166615991 | missense | C | A | 0.082 | p.D310Y  |
| 145 | <i>TTC21B</i>   | 24753   | 2  | 166773804 | missense | A | G | 0.056 | p.L621P  |
| 145 | <i>SCRN3</i>    | 24583   | 2  | 175287699 | missense | A | G | 0.060 | p.S281G  |
| 145 | <i>TTN</i>      | 133378  | 2  | 179585713 | missense | T | A | 0.085 | p.D7678V |
| 145 | <i>TTN</i>      | 133378  | 2  | 179594047 | missense | C | T | 0.058 | p.S6279N |
| 145 | <i>MSTN</i>     | 5259    | 2  | 190922291 | missense | T | C | 0.063 | p.E274G  |
| 145 | <i>SLC39A10</i> | 20342   | 2  | 196571444 | missense | A | T | 0.063 | p.T441S  |
| 145 | <i>IKZF2</i>    | 16260   | 2  | 213872667 | missense | A | T | 0.091 | p.L307H  |
| 145 | <i>FN1</i>      | 212482  | 2  | 216286882 | missense | A | T | 0.070 | p.M493K  |
| 145 | <i>CCDC108</i>  | 194302  | 2  | 219867730 | missense | C | A | 0.062 | p.D1903Y |
| 145 | <i>SGPP2</i>    | 152386  | 2  | 223423403 | missense | C | T | 0.063 | p.A329V  |
| 145 | <i>BRPF1</i>    | 4634    | 3  | 9788033   | missense | C | T | 0.111 | p.P1119L |
| 145 | <i>TRAK1</i>    | 1265608 | 3  | 42166993  | missense | C | A | 0.062 | p.A58D   |
| 145 | <i>NKTR</i>     | 5385    | 3  | 42672742  | missense | A | G | 0.067 | p.S162G  |
| 145 | <i>KLHL40</i>   | 152393  | 3  | 42727606  | missense | G | A | 0.085 | p.D166N  |
| 145 | <i>ABHD5</i>    | 16006   | 3  | 43759228  | missense | G | A | 0.062 | p.R280Q  |
| 145 | <i>PARP14</i>   | 17554   | 3  | 122437721 | missense | C | A | 0.052 | p.H1575N |
| 145 | <i>NPHP3</i>    | 153240  | 3  | 132440866 | missense | T | G | 0.171 | p.M112L  |
| 145 | <i>ANAPC13</i>  | 15391   | 3  | 134197543 | missense | T | A | 0.054 | p.E38D   |
| 145 | <i>SLC35G2</i>  | 25246   | 3  | 136573802 | missense | G | A | 0.051 | p.R167Q  |
| 145 | <i>PLD1</i>     | 2662    | 3  | 171427470 | missense | C | T | 0.085 | p.R314K  |
| 145 | <i>CHRD</i>     | 3741    | 3  | 184106420 | missense | A | T | 0.162 | p.D867V  |
| 145 | <i>NELFA</i>    | 5663    | 4  | 1987886   | missense | T | A | 0.231 | p.M275L  |
| 145 | <i>SORCS2</i>   | 20777   | 4  | 7691261   | missense | G | A | 0.083 | p.V513I  |
| 145 | <i>CLNK</i>     | 52964   | 4  | 10515107  | missense | G | T | 0.078 | p.P296H  |
| 145 | <i>TMEM165</i>  | 18475   | 4  | 56290806  | missense | A | T | 0.065 | p.R298S  |
| 145 | <i>REST</i>     | 5612    | 4  | 57798179  | missense | C | T | 0.056 | p.A1052V |
| 145 | <i>DCK</i>      | 788     | 4  | 71888211  | missense | T | A | 0.053 | p.L112Q  |
| 145 | <i>ANKRD17</i>  | 1286771 | 4  | 74088726  | missense | C | T | 0.067 | p.E7K    |
| 145 | <i>PPEF2</i>    | 6239    | 4  | 76797714  | missense | G | T | 0.118 | p.P349H  |
| 145 | <i>THAP9</i>    | 24672   | 4  | 83839689  | missense | G | T | 0.060 | p.C775F  |
| 145 | <i>ADH6</i>     | 1102470 | 4  | 100131429 | missense | T | C | 0.082 | p.D126G  |
| 145 | <i>FAT4</i>     | 24582   | 4  | 126371749 | missense | T | C | 0.063 | p.V3193A |
| 145 | <i>KLAA0922</i> | 15196   | 4  | 154507523 | missense | C | T | 0.125 | p.P491S  |
| 145 | <i>RXFP1</i>    | 21634   | 4  | 159567981 | missense | G | A | 0.088 | p.G330R  |
| 145 | <i>KLKB1</i>    | 892     | 4  | 187149371 | missense | A | T | 0.089 | p.T8S    |

|     |                   |         |    |           |          |   |   |       |          |
|-----|-------------------|---------|----|-----------|----------|---|---|-------|----------|
| 145 | <i>TRIML2</i>     | 173553  | 4  | 189020217 | missense | C | G | 0.161 | p.C148S  |
| 145 | <i>MYO10</i>      | 12334   | 5  | 16673974  | missense | G | T | 0.098 | p.S1663R |
| 145 | <i>C5orf42</i>    | 23073   | 5  | 37181016  | missense | G | T | 0.070 | p.T1838N |
| 145 | <i>LIFR</i>       | 2310    | 5  | 38484919  | missense | A | G | 0.050 | p.V850A  |
| 145 | <i>RICTOR</i>     | 152756  | 5  | 38944624  | missense | G | C | 0.051 | p.R1637G |
| 145 | <i>ARHGEF28</i>   | 1244364 | 5  | 73163755  | missense | C | A | 0.148 | p.S736Y  |
| 145 | <i>POC5</i>       | 152408  | 5  | 74988229  | missense | T | C | 0.052 | p.R263G  |
| 145 | <i>RASGRF2</i>    | 6909    | 5  | 80409671  | missense | C | G | 0.182 | p.T801R  |
| 145 | <i>ATP6AP1L</i>   | 1017971 | 5  | 81613895  | missense | A | G | 0.133 | p.I151V  |
| 145 | <i>CHSY3</i>      | 175856  | 5  | 129243869 | missense | G | A | 0.063 | p.G301E  |
| 145 | <i>HINT1</i>      | 5340    | 5  | 130495165 | missense | C | T | 0.082 | p.R119Q  |
| 145 | <i>CATSPER3</i>   | 178019  | 5  | 134305664 | missense | G | T | 0.058 | p.R45I   |
| 145 | <i>ANKHD1</i>     | 24668   | 5  | 139781806 | missense | G | T | 0.093 | p.R85M   |
| 145 | <i>TCOF1</i>      | 1195141 | 5  | 149771632 | missense | C | T | 0.053 | p.T1137I |
| 145 | <i>FI2</i>        | 505     | 5  | 176831338 | missense | C | T | 0.060 | p.A293T  |
| 145 | <i>SLC17A1</i>    | 5074    | 6  | 25820086  | missense | A | G | 0.056 | p.Y89H   |
| 145 | <i>HIST1H2AM</i>  | 3514    | 6  | 27860595  | missense | G | T | 0.080 | p.N111K  |
| 145 | <i>ZNF311</i>     | 1010877 | 6  | 28963421  | missense | C | T | 0.058 | p.S453N  |
| 145 | <i>MUC22</i>      | 1198815 | 6  | 30993390  | missense | C | A | 0.077 | p.T61K   |
| 145 | <i>HLA-DQA2</i>   | 20056   | 6  | 32713076  | missense | A | C | 0.063 | p.S75R   |
| 145 | <i>PTK7</i>       | 152882  | 6  | 43106613  | missense | C | A | 0.078 | p.Q419K  |
| 145 | <i>GPR111</i>     | 153839  | 6  | 47641199  | missense | C | A | 0.194 | p.P15H   |
| 145 | <i>GPR115</i>     | 153838  | 6  | 47682302  | missense | G | A | 0.055 | p.V441M  |
| 145 | <i>PHF3</i>       | 15153   | 6  | 64394089  | missense | A | G | 0.053 | p.S68G   |
| 145 | <i>SDK1</i>       | 152744  | 7  | 4089047   | missense | G | T | 0.098 | p.W890C  |
| 145 | <i>CYTH3</i>      | 4227    | 7  | 6205415   | missense | G | C | 0.053 | p.R284G  |
| 145 | <i>GNMB</i>       | 2510    | 7  | 23296589  | missense | G | A | 0.121 | p.G149D  |
| 145 | <i>BAZ1B</i>      | 32408   | 7  | 72880718  | missense | G | T | 0.067 | p.N960K  |
| 145 | <i>GTF2IRD1</i>   | 16328   | 7  | 73973314  | missense | G | A | 0.061 | p.G759D  |
| 145 | <i>AKAP9</i>      | 147185  | 7  | 91709099  | missense | T | A | 0.059 | p.V2543E |
| 145 | <i>SAP25</i>      | 1168682 | 7  | 100170048 | missense | C | A | 0.085 | p.Q154H  |
| 145 | <i>MUC17</i>      | 1040105 | 7  | 100678499 | missense | T | A | 0.081 | p.L1268M |
| 145 | <i>NRCAM</i>      | 5010    | 7  | 107872884 | missense | T | A | 0.089 | p.I105L  |
| 145 | <i>CASP2</i>      | 32982   | 7  | 143001851 | missense | T | A | 0.095 | p.M401K  |
| 145 | <i>EZH2</i>       | 152998  | 7  | 148543608 | missense | G | T | 0.062 | p.P67H   |
| 145 | <i>CSMD1</i>      | 33225   | 8  | 2796234   | missense | G | A | 0.061 | p.A3523V |
| 145 | <i>NAT1</i>       | 1291962 | 8  | 18079696  | missense | C | A | 0.056 | p.A109D  |
| 145 | <i>CCAR2</i>      | 21174   | 8  | 22472003  | missense | T | C | 0.052 | p.L343P  |
| 145 | <i>LETM2</i>      | 144652  | 8  | 38260109  | missense | G | T | 0.129 | p.G351W  |
| 145 | <i>VCP1P1</i>     | 25054   | 8  | 67546792  | missense | T | A | 0.056 | p.M1205L |
| 145 | <i>PREX2</i>      | 24870   | 8  | 69032482  | missense | G | A | 0.068 | p.D1186N |
| 145 | <i>DCAF4L2</i>    | 152418  | 8  | 88885412  | missense | T | A | 0.069 | p.K263M  |
| 145 | <i>OSGIN2</i>     | 1126111 | 8  | 90921857  | missense | A | T | 0.054 | p.D36V   |
| 145 | <i>INTS8</i>      | 17864   | 8  | 95850730  | missense | C | T | 0.091 | p.R301W  |
| 145 | <i>CSMD3</i>      | 198124  | 8  | 113318412 | missense | C | A | 0.172 | p.C2592F |
| 145 | <i>FER1L6</i>     | 1039112 | 8  | 125088439 | missense | G | A | 0.066 | p.A1365T |
| 145 | <i>SLA</i>        | 6748    | 8  | 134050923 | missense | C | T | 0.083 | p.S226N  |
| 145 | <i>SCRIB</i>      | 182706  | 8  | 144886022 | missense | G | A | 0.167 | p.T1070M |
| 145 | <i>ARID3C</i>     | 1017363 | 9  | 34623626  | missense | G | A | 0.064 | p.R221W  |
| 145 | <i>TESK1</i>      | 6285    | 9  | 35607333  | missense | G | T | 0.054 | p.V183F  |
| 145 | <i>TRPM3</i>      | 206947  | 9  | 73225536  | missense | A | G | 0.056 | p.W746R  |
| 145 | <i>PRUNE2</i>     | 15225   | 9  | 79323241  | missense | T | C | 0.105 | p.K1317E |
| 145 | <i>RM11</i>       | 24945   | 9  | 86616935  | missense | C | T | 0.051 | p.A345V  |
| 145 | <i>KLF4</i>       | 4235    | 9  | 110250032 | missense | G | A | 0.080 | p.P215S  |
| 145 | <i>RC3H2</i>      | 1100588 | 9  | 125611995 | missense | C | A | 0.069 | p.G1163C |
| 145 | <i>ABL1</i>       | 7313    | 9  | 133759761 | missense | G | A | 0.055 | p.S714N  |
| 145 | <i>NET1</i>       | 5863    | 10 | 5496309   | missense | C | A | 0.061 | p.P284T  |
| 145 | <i>FAM208B</i>    | 17782   | 10 | 5790986   | missense | T | C | 0.057 | p.S1868P |
| 145 | <i>CUBN</i>       | 1081    | 10 | 17113480  | missense | T | A | 0.053 | p.N857I  |
| 145 | <i>SVIL</i>       | 21738   | 10 | 29843824  | missense | A | T | 0.066 | p.N16K   |
| 145 | <i>FZD8</i>       | 31866   | 10 | 35929151  | missense | C | T | 0.070 | p.V403I  |
| 145 | <i>CSGALNACT2</i> | 18590   | 10 | 43651070  | missense | A | G | 0.051 | p.Q158R  |
| 145 | <i>GDF10</i>      | 4962    | 10 | 48429311  | missense | G | T | 0.133 | p.A192D  |
| 145 | <i>HK1</i>        | 33500   | 10 | 71144115  | missense | C | A | 0.078 | p.L521I  |
| 145 | <i>ZSWIM8</i>     | 15037   | 10 | 75559117  | missense | C | A | 0.057 | p.P1512T |
| 145 | <i>KAT6B</i>      | 12330   | 10 | 76602713  | missense | G | A | 0.056 | p.C33Y   |
| 145 | <i>LRIT1</i>      | 15613   | 10 | 85992038  | missense | C | G | 0.073 | p.R506P  |
| 145 | <i>IFIT1</i>      | 1548    | 10 | 91152471  | missense | T | A | 0.211 | p.M1K    |
| 145 | <i>PLCE1</i>      | 16341   | 10 | 95987078  | missense | A | G | 0.138 | p.T609A  |
| 145 | <i>C10orf12</i>   | 15652   | 10 | 98741197  | missense | C | A | 0.055 | p.A17D   |
| 145 | <i>SORCS1</i>     | 52918   | 10 | 108427534 | missense | T | A | 0.074 | p.N739I  |
| 145 | <i>FAM160B1</i>   | 20940   | 10 | 116605797 | missense | C | A | 0.052 | p.A385D  |
| 145 | <i>DMBT1</i>      | 17579   | 10 | 124389424 | missense | G | A | 0.060 | p.A1784T |
| 145 | <i>CHST15</i>     | 15892   | 10 | 125805716 | missense | T | G | 0.114 | p.L5L    |
| 145 | <i>TRIM68</i>     | 18073   | 11 | 4621730   | missense | G | A | 0.068 | p.P412S  |
| 145 | <i>SLC5A12</i>    | 178498  | 11 | 26743176  | missense | G | A | 0.056 | p.A29V   |
| 145 | <i>BDNF</i>       | 170735  | 11 | 27679862  | missense | T | G | 0.085 | p.N84H   |
| 145 | <i>KIAA1549L</i>  | 12194   | 11 | 33596318  | missense | G | A | 0.063 | p.G1137E |
| 145 | <i>SLC1A2</i>     | 4171    | 11 | 35336579  | missense | A | T | 0.108 | p.L92I   |
| 145 | <i>CKAP5</i>      | 1008938 | 11 | 46776482  | missense | C | T | 0.063 | p.E1609K |
| 145 | <i>SMTNL1</i>     | 1105565 | 11 | 57310351  | missense | A | G | 0.073 | p.E79G   |

|     |          |         |    |           |          |   |   |       |          |
|-----|----------|---------|----|-----------|----------|---|---|-------|----------|
| 145 | AHNAK    | 1620    | 11 | 62300307  | missense | C | A | 0.053 | p.D528Y  |
| 145 | HNRNPUL2 | 1079559 | 11 | 62491181  | missense | A | G | 0.066 | p.F257L  |
| 145 | DPF2     | 6268    | 11 | 65113431  | missense | C | A | 0.063 | p.P269H  |
| 145 | KCNK7    | 33347   | 11 | 65360542  | missense | C | G | 0.053 | p.Q286H  |
| 145 | LRFN4    | 24036   | 11 | 66626183  | missense | G | A | 0.053 | p.G323D  |
| 145 | CORO1B   | 20441   | 11 | 67210002  | missense | C | T | 0.055 | p.R33H   |
| 145 | NUMA1    | 6185    | 11 | 71727068  | missense | G | T | 0.055 | p.A494D  |
| 145 | ARAP1    | 15242   | 11 | 72408211  | missense | A | T | 0.055 | p.C995S  |
| 145 | RELT     | 152222  | 11 | 73103469  | missense | C | T | 0.053 | p.T194M  |
| 145 | TPBGL    | 1195528 | 11 | 74953106  | missense | C | T | 0.085 | p.R338C  |
| 145 | TENM4    | 1098816 | 11 | 78380529  | missense | C | G | 0.163 | p.W2287C |
| 145 | PCF11    | 15885   | 11 | 82878277  | missense | G | A | 0.053 | p.R643Q  |
| 145 | POU2AF1  | 6235    | 11 | 111225009 | missense | T | A | 0.075 | p.T250S  |
| 145 | CCDC15   | 25004   | 11 | 124863125 | missense | C | A | 0.074 | p.P734T  |
| 145 | WNK1     | 213655  | 12 | 970360    | missense | C | A | 0.056 | p.T601K  |
| 145 | CACNA2D4 | 172364  | 12 | 1919749   | missense | C | A | 0.075 | p.S873I  |
| 145 | CD9      | 1769    | 12 | 6309691   | missense | G | A | 0.056 | p.C9Y    |
| 145 | CD163L1  | 174941  | 12 | 7527290   | missense | G | A | 0.072 | p.H1053Y |
| 145 | A2M      | 14      | 12 | 9246128   | missense | C | T | 0.102 | p.E725K  |
| 145 | LRP6     | 2336    | 12 | 12311834  | missense | A | G | 0.156 | p.V907A  |
| 145 | PKP2     | 4572    | 12 | 32945649  | missense | C | A | 0.133 | p.A836S  |
| 145 | SYT10    | 198992  | 12 | 33535419  | missense | C | A | 0.068 | p.R412L  |
| 145 | LMBR1L   | 18113   | 12 | 49498244  | missense | G | A | 0.053 | p.A136V  |
| 145 | FAM186B  | 32130   | 12 | 49994839  | missense | G | T | 0.082 | p.P195Q  |
| 145 | SLC4A8   | 1258401 | 12 | 51890859  | missense | G | A | 0.077 | p.S958N  |
| 145 | KRT3     | 57088   | 12 | 53189427  | missense | C | G | 0.109 | p.A134P  |
| 145 | GLI1     | 5269    | 12 | 57865738  | missense | G | A | 0.063 | p.G1072E |
| 145 | CTDSP2   | 5730    | 12 | 58217698  | missense | G | T | 0.065 | p.P227T  |
| 145 | CTDSP2   | 5730    | 12 | 58217770  | missense | G | T | 0.062 | p.L203I  |
| 145 | CTDSP2   | 5730    | 12 | 58220801  | missense | G | T | 0.084 | p.T111N  |
| 145 | CTDSP2   | 5730    | 12 | 58220811  | missense | G | T | 0.053 | p.L108I  |
| 145 | CTDSP2   | 5730    | 12 | 58220819  | missense | A | G | 0.097 | p.V105A  |
| 145 | BBS10    | 24685   | 12 | 76741028  | missense | G | T | 0.080 | p.S246Y  |
| 145 | FGD6     | 18351   | 12 | 95603229  | missense | C | T | 0.056 | p.V611M  |
| 145 | TMEM132C | 1136103 | 12 | 129180598 | missense | C | A | 0.050 | p.Q627K  |
| 145 | BRC2     | 59      | 13 | 32910581  | missense | A | G | 0.051 | p.K697E  |
| 145 | EXOSC8   | 181503  | 13 | 37578660  | missense | C | T | 0.050 | p.A67V   |
| 145 | THSD1    | 199263  | 13 | 52971819  | missense | G | A | 0.191 | p.T190I  |
| 145 | PNP      | 270     | 14 | 20944591  | missense | G | A | 0.060 | p.R234Q  |
| 145 | EDDM3B   | 22360   | 14 | 21238629  | missense | A | T | 0.056 | p.Q107L  |
| 145 | HOMER    | 20834   | 14 | 23746180  | missense | G | A | 0.052 | p.A86V   |
| 145 | LRRC16B  | 138360  | 14 | 24528549  | missense | G | A | 0.050 | p.G566D  |
| 145 | FBXO34   | 152231  | 14 | 55817500  | missense | G | A | 0.063 | p.R131K  |
| 145 | KTN1     | 4986    | 14 | 56117061  | missense | T | A | 0.082 | p.D807E  |
| 145 | WDR89    | 80666   | 14 | 64066367  | missense | A | T | 0.083 | p.D98E   |
| 145 | WDR89    | 80666   | 14 | 64066395  | missense | C | T | 0.133 | p.C89Y   |
| 145 | WDR89    | 80666   | 14 | 64066398  | missense | G | C | 0.115 | p.A88G   |
| 145 | WDR89    | 80666   | 14 | 64066402  | missense | A | G | 0.126 | p.S87P   |
| 145 | AKAP5    | 4857    | 14 | 64936364  | missense | G | A | 0.065 | p.D418N  |
| 145 | MAP3K9   | 33141   | 14 | 71216715  | missense | G | A | 0.058 | p.A362V  |
| 145 | FOS      | 5252    | 14 | 75747586  | missense | G | T | 0.058 | p.R201L  |
| 145 | DDX24    | 20414   | 14 | 94528621  | missense | C | A | 0.069 | p.E355D  |
| 145 | SERPINA1 | 1127707 | 14 | 94849473  | missense | C | A | 0.077 | p.K34N   |
| 145 | SQRDL    | 21199   | 15 | 45981393  | missense | C | A | 0.098 | p.L425M  |
| 145 | SLC12A1  | 1184832 | 15 | 48499939  | missense | A | G | 0.059 | p.N8S    |
| 145 | CEP152   | 14985   | 15 | 49034199  | missense | G | A | 0.054 | p.R1312C |
| 145 | LEO1     | 138792  | 15 | 52257978  | missense | G | A | 0.054 | p.S261L  |
| 145 | LDHAL6B  | 33195   | 15 | 59500155  | missense | G | A | 0.086 | p.S339N  |
| 145 | MYO1E    | 4998    | 15 | 59510272  | missense | C | T | 0.167 | p.A309T  |
| 145 | VPS13C   | 20821   | 15 | 62255003  | missense | G | A | 0.053 | p.A1127V |
| 145 | VPS13C   | 20821   | 15 | 62266596  | missense | A | T | 0.053 | p.L810H  |
| 145 | NOX5     | 24505   | 15 | 69347718  | missense | A | G | 0.070 | p.K682E  |
| 145 | TLE3     | 20908   | 15 | 70388588  | missense | G | A | 0.054 | p.P13S   |
| 145 | CSPG4    | 1897    | 15 | 75977720  | missense | C | A | 0.056 | p.G1371V |
| 145 | SCAPER   | 20843   | 15 | 76914160  | missense | A | T | 0.063 | p.Y640N  |
| 145 | IL16     | 172217  | 15 | 81517751  | missense | A | T | 0.080 | p.H4L    |
| 145 | IQGAP1   | 3870    | 15 | 91017876  | missense | T | A | 0.095 | p.L912H  |
| 145 | TNRC6A   | 14494   | 16 | 24802979  | missense | T | A | 0.068 | p.S1006T |
| 145 | TNRC6A   | 14494   | 16 | 24834817  | missense | T | A | 0.058 | p.F1860I |
| 145 | SRCAP    | 6662    | 16 | 30733463  | missense | G | A | 0.093 | p.G1188R |
| 145 | HERPUDI  | 14685   | 16 | 56966197  | missense | T | C | 0.111 | p.V14A   |
| 145 | PSKH1    | 6742    | 16 | 67942738  | missense | G | A | 0.056 | p.G29D   |
| 145 | PMFBP1   | 31293   | 16 | 72153955  | missense | C | A | 0.067 | p.Q809H  |
| 145 | ZFH3     | 6885    | 16 | 72828030  | missense | C | T | 0.190 | p.G2851S |
| 145 | FANCA    | 1286167 | 16 | 89874739  | missense | C | T | 0.063 | p.V187I  |
| 145 | DOC2B    | 3585    | 17 | 22359     | missense | T | A | 0.087 | p.N141I  |
| 145 | INPP5K   | 16532   | 17 | 1417221   | missense | T | A | 0.052 | p.S33C   |
| 145 | C17orf85 | 1114118 | 17 | 3732603   | missense | G | T | 0.077 | p.Q139K  |
| 145 | ACAP1    | 14716   | 17 | 7247217   | missense | A | T | 0.100 | p.Q204L  |
| 145 | C17orf74 | 175734  | 17 | 7330559   | missense | G | A | 0.050 | p.A417T  |
| 145 | ALOXE3   | 21628   | 17 | 8018940   | missense | C | T | 0.077 | p.R140Q  |



|     |                 |         |    |           |          |   |   |       |          |
|-----|-----------------|---------|----|-----------|----------|---|---|-------|----------|
| 145 | <i>MYH2</i>     | 17534   | 17 | 10435038  | missense | G | A | 0.068 | p.A870V  |
| 145 | <i>MYH3</i>     | 2470    | 17 | 10545856  | missense | T | C | 0.073 | p.Y589C  |
| 145 | <i>ADORA2B</i>  | 676     | 17 | 15848699  | missense | T | A | 0.082 | p.L46Q   |
| 145 | <i>ZNF624</i>   | 20787   | 17 | 16525654  | missense | G | A | 0.093 | p.S849L  |
| 145 | <i>FLCN</i>     | 144997  | 17 | 17117077  | missense | C | A | 0.056 | p.E544D  |
| 145 | <i>ALKBH5</i>   | 17758   | 17 | 18087849  | missense | G | A | 0.062 | p.D98N   |
| 145 | <i>SLC6A4</i>   | 1045    | 17 | 28548960  | missense | A | G | 0.056 | p.L6S    |
| 145 | <i>ZNF830</i>   | 52857   | 17 | 33288595  | missense | T | G | 0.146 | p.S4A    |
| 145 | <i>SRCIN1</i>   | 25248   | 17 | 36720438  | missense | G | A | 0.067 | p.P153S  |
| 145 | <i>HCRT</i>     | 1524    | 17 | 40336452  | missense | C | T | 0.063 | p.C39Y   |
| 145 | <i>ATP6V0A1</i> | 5177    | 17 | 40642572  | missense | A | T | 0.063 | p.Y364F  |
| 145 | <i>EMILIN2</i>  | 32048   | 18 | 2909745   | missense | C | T | 0.070 | p.P918S  |
| 145 | <i>TGIF1</i>    | 174886  | 18 | 3457688   | missense | A | T | 0.051 | p.Q170L  |
| 145 | <i>GREB1L</i>   | 1142966 | 18 | 19029526  | missense | G | A | 0.095 | p.M483I  |
| 145 | <i>LAMA3</i>    | 198129  | 18 | 21426358  | missense | G | A | 0.057 | p.A1273T |
| 145 | <i>SETBP1</i>   | 15559   | 18 | 42530201  | missense | C | T | 0.159 | p.P299L  |
| 145 | <i>KDSR</i>     | 2035    | 18 | 61006107  | missense | T | A | 0.065 | p.T235S  |
| 145 | <i>ABCA7</i>    | 19112   | 19 | 1046922   | missense | C | T | 0.133 | p.R582C  |
| 145 | <i>LMNB2</i>    | 32737   | 19 | 2431819   | missense | C | T | 0.079 | p.E558K  |
| 145 | <i>HSD11B1L</i> | 198708  | 19 | 5687929   | missense | G | A | 0.063 | p.S224N  |
| 145 | <i>ZNF846</i>   | 1077624 | 19 | 9869316   | missense | T | C | 0.050 | p.Q146R  |
| 145 | <i>CC2D1A</i>   | 17721   | 19 | 14034210  | missense | C | A | 0.080 | p.S569Y  |
| 145 | <i>HAUS8</i>    | 33417   | 19 | 17170858  | missense | G | T | 0.121 | p.L92M   |
| 145 | <i>CRTC1</i>    | 15321   | 19 | 18870394  | missense | G | A | 0.052 | p.G236R  |
| 145 | <i>HAUS5</i>    | 15302   | 19 | 36110961  | missense | C | A | 0.054 | p.P485H  |
| 145 | <i>GMFG</i>     | 4877    | 19 | 39819122  | missense | G | A | 0.125 | p.R142C  |
| 145 | <i>FCGBP</i>    | 3890    | 19 | 40366547  | missense | G | A | 0.105 | p.P4563S |
| 145 | <i>FCGBP</i>    | 3890    | 19 | 40366549  | missense | A | G | 0.105 | p.L4562P |
| 145 | <i>AXL</i>      | 21913   | 19 | 41765523  | missense | G | T | 0.077 | p.R800L  |
| 145 | <i>LYPD5</i>    | 182573  | 19 | 44301885  | missense | C | T | 0.080 | p.G162D  |
| 145 | <i>CD3EAP</i>   | 12099   | 19 | 45912071  | missense | C | T | 0.063 | p.T282I  |
| 145 | <i>PNMAL1</i>   | 18215   | 19 | 46973161  | missense | C | A | 0.051 | p.D378Y  |
| 145 | <i>ARHGAP35</i> | 4491    | 19 | 47424543  | missense | C | T | 0.065 | p.R871C  |
| 145 | <i>BBC3</i>     | 14417   | 19 | 47729852  | missense | G | A | 0.118 | p.A145V  |
| 145 | <i>KPTN</i>     | 7059    | 19 | 47979789  | missense | C | A | 0.075 | p.Q394H  |
| 145 | <i>CLDND2</i>   | 152353  | 19 | 51871172  | missense | C | T | 0.073 | p.G93D   |
| 145 | <i>ZNF350</i>   | 21632   | 19 | 52468780  | missense | T | A | 0.138 | p.Q309L  |
| 145 | <i>PRKCG</i>    | 2739    | 19 | 54385809  | missense | A | G | 0.121 | p.R21G   |
| 145 | <i>LILRB3</i>   | 24318   | 19 | 54744781  | missense | T | G | 0.160 | p.Y291S  |
| 145 | <i>PPP1R12C</i> | 17607   | 19 | 55604014  | missense | G | A | 0.075 | p.P643L  |
| 145 | <i>PPP6R1</i>   | 14931   | 19 | 55750803  | missense | T | C | 0.070 | p.E574G  |
| 145 | <i>ZNF582</i>   | 144690  | 19 | 56895321  | missense | T | C | 0.053 | p.I489V  |
| 145 | <i>ZNF606</i>   | 25027   | 19 | 58491143  | missense | A | T | 0.062 | p.I302K  |
| 145 | <i>ZNF135</i>   | 7134    | 19 | 58573071  | missense | G | A | 0.063 | p.V53M   |
| 145 | <i>ZNF324B</i>  | 207395  | 19 | 58965158  | missense | G | A | 0.056 | p.M30I   |
| 145 | <i>TMC2</i>     | 80751   | 20 | 2559828   | missense | A | G | 0.073 | p.K228E  |
| 145 | <i>ATRN</i>     | 139322  | 20 | 3543044   | missense | C | A | 0.055 | p.F523L  |
| 145 | <i>BPI</i>      | 1725    | 20 | 36938960  | missense | A | T | 0.061 | p.S152C  |
| 145 | <i>KREMEN1</i>  | 32045   | 22 | 29533438  | missense | G | A | 0.058 | p.R247Q  |
| 145 | <i>RRP7A</i>    | 15703   | 22 | 42915746  | missense | C | T | 0.200 | p.R16H   |
| 145 | <i>EFCAB6</i>   | 198856  | 22 | 44022409  | missense | C | T | 0.078 | p.V795I  |
| 145 | <i>PPP6R2</i>   | 14678   | 22 | 50874814  | missense | G | A | 0.065 | p.R512H  |
| 145 | <i>HDAC6</i>    | 6044    | X  | 48664837  | missense | T | C | 0.073 | p.L167P  |
| 145 | <i>ZC4H2</i>    | 18684   | X  | 64139054  | missense | C | A | 0.054 | p.Q143H  |
| 145 | <i>KIF4A</i>    | 12310   | X  | 69639596  | missense | G | A | 0.074 | p.S1153N |
| 145 | <i>HDX</i>      | 144657  | X  | 83581198  | missense | C | A | 0.069 | p.K645N  |
| 145 | <i>CXorf57</i>  | 18015   | X  | 105882762 | missense | T | C | 0.061 | p.S527P  |
| 145 | <i>ALG13</i>    | 1257237 | X  | 110968248 | missense | G | A | 0.114 | p.R459K  |
| 145 | <i>AMOT</i>     | 133265  | X  | 112035202 | missense | T | A | 0.061 | p.K186M  |
| 145 | <i>MTMR1</i>    | 3828    | X  | 149924290 | missense | T | G | 0.060 | p.L596V  |
| 145 | <i>GABRQ</i>    | 18558   | X  | 151815476 | missense | C | A | 0.061 | p.T125N  |
| 145 | <i>SLC10A3</i>  | 19848   | X  | 153715967 | missense | C | T | 0.064 | p.R409H  |
| 145 | <i>GNAQ</i>     | 2072    | 9  | 80537112  | missense | T | A | 0.261 | p.T96S   |
| 147 | <i>SEC24D</i>   | 14822   | 4  | 119660349 | stopgain | T | A | 0.160 | p.K778X  |
| 147 | <i>WDR89</i>    | 80666   | 14 | 64066363  | stopgain | G | A | 0.108 | p.R100X  |
| 147 | <i>ATP2A1</i>   | 173201  | 16 | 28912148  | stopgain | C | T | 0.060 | p.R671X  |
| 147 | <i>KIAA1328</i> | 20776   | 18 | 34647273  | stopgain | G | T | 0.206 | p.E333X  |
| 147 | <i>CACNA1I</i>  | 21096   | 22 | 40076984  | stopgain | C | A | 0.103 | p.S1864X |
| 147 | <i>ZBTB48</i>   | 5341    | 1  | 6642217   | missense | C | T | 0.087 | p.P264S  |
| 147 | <i>TIE1</i>     | 5424    | 1  | 43783241  | missense | C | T | 0.062 | p.A876V  |
| 147 | <i>ERICH3</i>   | 1002912 | 1  | 75078377  | missense | C | T | 0.264 | p.G373S  |
| 147 | <i>COLGALT2</i> | 15101   | 1  | 183942796 | missense | T | C | 0.219 | p.E194G  |
| 147 | <i>CD46</i>     | 172361  | 1  | 207940453 | missense | G | A | 0.058 | p.D257N  |
| 147 | <i>SYT14</i>    | 153262  | 1  | 210267899 | missense | A | T | 0.065 | p.E187D  |
| 147 | <i>ACVR1C</i>   | 145259  | 2  | 158406791 | missense | C | G | 0.276 | p.A220P  |
| 147 | <i>TTN</i>      | 133378  | 2  | 179583962 | missense | G | A | 0.221 | p.T8052I |
| 147 | <i>AGXT</i>     | 30      | 2  | 241817009 | missense | G | A | 0.111 | p.R301H  |
| 147 | <i>XPC</i>      | 4628    | 3  | 14219989  | missense | G | A | 0.197 | p.A27V   |
| 147 | <i>CSRNP1</i>   | 33027   | 3  | 39186567  | missense | G | A | 0.054 | p.A129V  |
| 147 | <i>ZNF717</i>   | 1290209 | 3  | 75788230  | missense | C | T | 0.061 | p.V132I  |
| 147 | <i>ZIC4</i>     | 32153   | 3  | 147108985 | missense | G | A | 0.065 | p.A246V  |

|     |                 |         |    |           |          |   |   |       |          |
|-----|-----------------|---------|----|-----------|----------|---|---|-------|----------|
| 147 | <i>PEX5L</i>    | 16559   | 3  | 179529592 | missense | T | G | 0.176 | p.Q384P  |
| 147 | <i>RFC1</i>     | 2913    | 4  | 39344058  | missense | T | C | 0.069 | p.K80E   |
| 147 | <i>PTPN13</i>   | 80685   | 4  | 87691072  | missense | A | C | 0.241 | p.K1552T |
| 147 | <i>CDH12</i>    | 4061    | 5  | 21755750  | missense | A | G | 0.250 | p.L612P  |
| 147 | <i>MROH2B</i>   | 173489  | 5  | 41004501  | missense | C | T | 0.065 | p.V1381M |
| 147 | <i>NUDT12</i>   | 31438   | 5  | 102895154 | missense | A | C | 0.174 | p.I74M   |
| 147 | <i>PCDHGB6</i>  | 32100   | 5  | 140789036 | missense | G | A | 0.140 | p.V423I  |
| 147 | <i>RIPK1</i>    | 3804    | 6  | 3113419   | missense | G | A | 0.170 | p.R621Q  |
| 147 | <i>SDK1</i>     | 152744  | 7  | 4091412   | missense | C | A | 0.065 | p.P954H  |
| 147 | <i>GRID2IP</i>  | 1145118 | 7  | 6537817   | missense | C | T | 0.175 | p.G1148R |
| 147 | <i>CRHR2</i>    | 1883    | 7  | 30721564  | missense | C | T | 0.063 | p.E52K   |
| 147 | <i>TNS3</i>     | 22748   | 7  | 47336776  | missense | A | C | 0.258 | p.F1194V |
| 147 | <i>PCLO</i>     | 33026   | 7  | 82580404  | missense | G | A | 0.278 | p.T3167I |
| 147 | <i>FBXL13</i>   | 145032  | 7  | 102667927 | missense | C | A | 0.056 | p.R99I   |
| 147 | <i>SHH</i>      | 193     | 7  | 155599169 | missense | C | A | 0.061 | p.W128L  |
| 147 | <i>DLGAP2</i>   | 4745    | 8  | 1616708   | missense | T | G | 0.116 | p.L595R  |
| 147 | <i>PTK2B</i>    | 173176  | 8  | 27301727  | missense | G | A | 0.286 | p.S718N  |
| 147 | <i>MALRD1</i>   | 1142308 | 10 | 19413531  | missense | G | A | 0.063 | p.R292H  |
| 147 | <i>C10orf25</i> | 1039380 | 10 | 45496249  | missense | A | G | 0.055 | p.L20P   |
| 147 | <i>TIAL1</i>    | 3252    | 10 | 121341701 | missense | C | A | 0.061 | p.S88I   |
| 147 | <i>CTDSP2</i>   | 5730    | 12 | 58217698  | missense | G | T | 0.058 | p.P227T  |
| 147 | <i>CTDSP2</i>   | 5730    | 12 | 58217763  | missense | C | T | 0.217 | p.R205H  |
| 147 | <i>CTDSP2</i>   | 5730    | 12 | 58217770  | missense | G | C | 0.085 | p.L203V  |
| 147 | <i>CTDSP2</i>   | 5730    | 12 | 58220811  | missense | G | T | 0.060 | p.L108I  |
| 147 | <i>LRIG3</i>    | 153377  | 12 | 59268296  | missense | G | T | 0.063 | p.L919I  |
| 147 | <i>LATS2</i>    | 14572   | 13 | 21557725  | missense | C | T | 0.242 | p.R707Q  |
| 147 | <i>WDR89</i>    | 80666   | 14 | 64066352  | missense | T | A | 0.067 | p.R103S  |
| 147 | <i>WDR89</i>    | 80666   | 14 | 64066367  | missense | A | T | 0.100 | p.D98E   |
| 147 | <i>WDR89</i>    | 80666   | 14 | 64066395  | missense | C | T | 0.132 | p.C89Y   |
| 147 | <i>WDR89</i>    | 80666   | 14 | 64066398  | missense | G | C | 0.135 | p.A88G   |
| 147 | <i>WDR89</i>    | 80666   | 14 | 64066402  | missense | A | G | 0.136 | p.S87P   |
| 147 | <i>SPTB</i>     | 1024858 | 14 | 65251050  | missense | C | T | 0.078 | p.R1306Q |
| 147 | <i>DPH6</i>     | 80650   | 15 | 35834658  | missense | T | C | 0.186 | p.H25R   |
| 147 | <i>CRAMP1L</i>  | 20825   | 16 | 1706779   | missense | G | A | 0.182 | p.R674H  |
| 147 | <i>ORIE2</i>    | 3554    | 17 | 3336748   | missense | T | G | 0.097 | p.M130L  |
| 147 | <i>ORIE2</i>    | 3554    | 17 | 3336750   | missense | G | A | 0.083 | p.P129L  |
| 147 | <i>KRT40</i>    | 182497  | 17 | 39137138  | missense | G | T | 0.234 | p.L292M  |
| 147 | <i>DLGAP1</i>   | 4746    | 18 | 3879245   | missense | T | C | 0.152 | p.K275R  |
| 147 | <i>LAMA3</i>    | 198129  | 18 | 21293894  | missense | G | A | 0.238 | p.C102Y  |
| 147 | <i>TCEB3B</i>   | 16427   | 18 | 44559941  | missense | A | T | 0.250 | p.D565E  |
| 147 | <i>ZNF266</i>   | 6631    | 19 | 9524511   | missense | T | G | 0.093 | p.N364H  |
| 147 | <i>MED26</i>    | 4831    | 19 | 16688019  | missense | G | A | 0.202 | p.R208C  |
| 147 | <i>SYNE4</i>    | 1039876 | 19 | 36497837  | missense | C | T | 0.167 | p.V145M  |
| 147 | <i>CD40</i>     | 152854  | 20 | 44751261  | missense | G | A | 0.067 | p.R90Q   |
| 147 | <i>MIF</i>      | 2415    | 22 | 24236995  | missense | G | A | 0.172 | p.A49T   |
| 147 | <i>MIF</i>      | 2415    | 22 | 24237001  | missense | G | A | 0.167 | p.G51S   |
| 150 | <i>C2orf57</i>  | 152614  | 2  | 232458089 | stopgain | A | T | 0.154 | p.R143X  |
| 150 | <i>TLL1</i>     | 12464   | 4  | 166981338 | stopgain | G | T | 0.157 | p.E669X  |
| 150 | <i>LRRD1</i>    | 1161528 | 7  | 91774343  | stopgain | C | T | 0.050 | p.W814X  |
| 150 | <i>TMC1</i>     | 138691  | 9  | 75404222  | stopgain | G | T | 0.150 | p.E405X  |
| 150 | <i>LYZL1</i>    | 32517   | 10 | 29581448  | stopgain | G | A | 0.132 | p.W93X   |
| 150 | <i>WDR89</i>    | 80666   | 14 | 64066363  | stopgain | G | A | 0.087 | p.R100X  |
| 150 | <i>SMCHD1</i>   | 15295   | 18 | 2739512   | stopgain | G | T | 0.106 | p.E1170X |
| 150 | <i>VPS16</i>    | 22575   | 20 | 2843264   | stopgain | C | T | 0.083 | p.Q371X  |
| 150 | <i>TCN2</i>     | 1184726 | 22 | 31022460  | stopgain | C | G | 0.052 | p.Y385X  |
| 150 | <i>SAMD13</i>   | 1134664 | 1  | 84791375  | missense | G | A | 0.070 | p.V37I   |
| 150 | <i>WDR63</i>    | 145172  | 1  | 85573786  | missense | G | C | 0.115 | p.E542Q  |
| 150 | <i>PRUNE</i>    | 21222   | 1  | 150990334 | missense | T | C | 0.058 | p.L29S   |
| 150 | <i>MUC1</i>     | 1204286 | 1  | 155161015 | missense | G | A | 0.138 | p.T180I  |
| 150 | <i>LMX1A</i>    | 177398  | 1  | 165175103 | missense | T | C | 0.071 | p.Y329C  |
| 150 | <i>LGR6</i>     | 21636   | 1  | 202288114 | missense | G | A | 0.088 | p.G843S  |
| 150 | <i>OBSCN</i>    | 1271223 | 1  | 228561708 | missense | A | G | 0.074 | p.D8417G |
| 150 | <i>GAREML</i>   | 1168241 | 2  | 26410482  | missense | G | A | 0.138 | p.G661S  |
| 150 | <i>TBC1D8</i>   | 1102426 | 2  | 101650076 | missense | G | A | 0.144 | p.T568M  |
| 150 | <i>EVX2</i>     | 1080458 | 2  | 176948202 | missense | C | A | 0.170 | p.K101N  |
| 150 | <i>TTN</i>      | 133378  | 2  | 179585731 | missense | C | G | 0.095 | p.S7672T |
| 150 | <i>SSUH2</i>    | 15931   | 3  | 8671409   | missense | A | G | 0.165 | p.C155R  |
| 150 | <i>ZNF717</i>   | 1290209 | 3  | 75788230  | missense | C | T | 0.082 | p.V132I  |
| 150 | <i>TF</i>       | 1063    | 3  | 133485253 | missense | A | T | 0.057 | p.N488Y  |
| 150 | <i>ANAPC13</i>  | 15391   | 3  | 134197439 | missense | C | T | 0.136 | p.G73E   |
| 150 | <i>ZNF732</i>   | 1137608 | 4  | 264941    | missense | A | T | 0.070 | p.W568R  |
| 150 | <i>SDAD1</i>    | 18115   | 4  | 76892532  | missense | T | A | 0.082 | p.E264V  |
| 150 | <i>WDFY3</i>    | 14991   | 4  | 85614039  | missense | T | A | 0.145 | p.K3016N |
| 150 | <i>DCHS2</i>    | 17639   | 4  | 155160363 | missense | A | T | 0.079 | p.I2029N |
| 150 | <i>GUCY1A3</i>  | 1256449 | 4  | 156632390 | missense | A | G | 0.053 | p.K358R  |
| 150 | <i>C1QTNF3</i>  | 181435  | 5  | 34042981  | missense | G | C | 0.116 | p.L84V   |
| 150 | <i>MAP3K1</i>   | 5921    | 5  | 56177851  | missense | A | T | 0.079 | p.T942S  |
| 150 | <i>HLA-DQA2</i> | 20056   | 6  | 32712967  | missense | C | G | 0.063 | p.F38L   |
| 150 | <i>HLA-DQA2</i> | 20056   | 6  | 32713076  | missense | A | C | 0.059 | p.S75R   |
| 150 | <i>HLA-DQA2</i> | 20056   | 6  | 32713080  | missense | A | G | 0.058 | p.K76R   |
| 150 | <i>HLA-DQA2</i> | 20056   | 6  | 32713090  | missense | T | A | 0.051 | p.S79R   |

|     |                 |         |    |           |          |   |   |       |          |
|-----|-----------------|---------|----|-----------|----------|---|---|-------|----------|
| 150 | <i>HLA-DPB1</i> | 2121    | 6  | 33048596  | missense | C | T | 0.095 | p.P83L   |
| 150 | <i>MYCT1</i>    | 25107   | 6  | 153019103 | missense | T | G | 0.098 | p.D22E   |
| 150 | <i>TRRAP</i>    | 3496    | 7  | 98609027  | missense | G | T | 0.119 | p.D3722Y |
| 150 | <i>CLN8</i>     | 18941   | 8  | 1728650   | missense | C | A | 0.145 | p.P260T  |
| 150 | <i>PIPSK1B</i>  | 3558    | 9  | 71509373  | missense | G | T | 0.117 | p.R197I  |
| 150 | <i>FOXB2</i>    | 1013735 | 9  | 79635863  | missense | C | G | 0.121 | p.H431Q  |
| 150 | <i>GABBR2</i>   | 5458    | 9  | 101470769 | missense | G | A | 0.100 | p.A84V   |
| 150 | <i>NRP1</i>     | 3873    | 10 | 33496542  | missense | C | T | 0.157 | p.G573R  |
| 150 | <i>NCOA4</i>    | 1145260 | 10 | 51586656  | missense | A | G | 0.059 | p.Q645R  |
| 150 | <i>FAM13C</i>   | 198215  | 10 | 61028363  | missense | G | A | 0.140 | p.R215W  |
| 150 | <i>ARID5B</i>   | 32199   | 10 | 63810748  | missense | G | T | 0.108 | p.A279S  |
| 150 | <i>KCNMA1</i>   | 2247    | 10 | 78669852  | missense | T | C | 0.075 | p.N979D  |
| 150 | <i>CNNM2</i>    | 199077  | 10 | 104678734 | missense | A | G | 0.139 | p.N166S  |
| 150 | <i>CTBP2</i>    | 22802   | 10 | 126686646 | missense | C | G | 0.129 | p.W151S  |
| 150 | <i>CTBP2</i>    | 22802   | 10 | 126686649 | missense | G | C | 0.125 | p.T150R  |
| 150 | <i>CTBP2</i>    | 22802   | 10 | 126686656 | missense | T | C | 0.118 | p.R148G  |
| 150 | <i>CTBP2</i>    | 22802   | 10 | 126686659 | missense | G | A | 0.105 | p.R147W  |
| 150 | <i>JAKMIP3</i>  | 1105521 | 10 | 133949525 | missense | C | A | 0.060 | p.A354D  |
| 150 | <i>SLC22A12</i> | 144585  | 11 | 64359201  | missense | C | T | 0.093 | p.T58M   |
| 150 | <i>LTBP3</i>    | 21070   | 11 | 65325216  | missense | T | A | 0.053 | p.K72M   |
| 150 | <i>TENM4</i>    | 1098816 | 11 | 78387252  | missense | C | T | 0.083 | p.R1814H |
| 150 | <i>GRIA4</i>    | 1077243 | 11 | 105804609 | missense | G | C | 0.068 | p.Q736H  |
| 150 | <i>SCN2B</i>    | 4588    | 11 | 118039422 | missense | T | C | 0.053 | p.N39D   |
| 150 | <i>ESAM</i>     | 138961  | 11 | 124628309 | missense | G | A | 0.056 | p.S62L   |
| 150 | <i>SLCO1B7</i>  | 1009562 | 12 | 21229404  | missense | T | C | 0.079 | p.I542T  |
| 150 | <i>ADAMTS20</i> | 25003   | 12 | 43769882  | missense | A | C | 0.185 | p.F1764V |
| 150 | <i>KMT2D</i>    | 3482    | 12 | 49420390  | missense | C | T | 0.063 | p.R5120H |
| 150 | <i>TFCP2</i>    | 5653    | 12 | 51495751  | missense | T | A | 0.063 | p.D373V  |
| 150 | <i>KRT3</i>     | 57088   | 12 | 53189427  | missense | C | G | 0.159 | p.A134P  |
| 150 | <i>SMARCC2</i>  | 139067  | 12 | 56572249  | missense | C | T | 0.117 | p.V417M  |
| 150 | <i>CTDSP2</i>   | 5730    | 12 | 58217698  | missense | G | T | 0.077 | p.P227T  |
| 150 | <i>CTDSP2</i>   | 5730    | 12 | 58217763  | missense | C | T | 0.194 | p.R205H  |
| 150 | <i>CTDSP2</i>   | 5730    | 12 | 58217770  | missense | G | C | 0.104 | p.L203V  |
| 150 | <i>CTDSP2</i>   | 5730    | 12 | 58220801  | missense | G | T | 0.076 | p.T111N  |
| 150 | <i>CTDSP2</i>   | 5730    | 12 | 58240188  | missense | G | A | 0.123 | p.R11W   |
| 150 | <i>CTDSP2</i>   | 5730    | 12 | 58240214  | missense | T | G | 0.103 | p.E2A    |
| 150 | <i>SRGAP1</i>   | 20762   | 12 | 64536346  | missense | A | G | 0.104 | p.K1051R |
| 150 | <i>TBK1</i>     | 13254   | 12 | 64868050  | missense | A | G | 0.063 | p.H194R  |
| 150 | <i>SART3</i>    | 14706   | 12 | 108942902 | missense | G | A | 0.053 | p.A134V  |
| 150 | <i>CIT</i>      | 7174    | 12 | 120263095 | missense | T | A | 0.056 | p.K277N  |
| 150 | <i>HECTD1</i>   | 15382   | 14 | 31576195  | missense | C | G | 0.068 | p.D2295H |
| 150 | <i>WDR89</i>    | 80666   | 14 | 64066326  | missense | C | T | 0.052 | p.G112D  |
| 150 | <i>WDR89</i>    | 80666   | 14 | 64066352  | missense | T | A | 0.080 | p.R103S  |
| 150 | <i>WDR89</i>    | 80666   | 14 | 64066367  | missense | A | T | 0.102 | p.D98E   |
| 150 | <i>WDR89</i>    | 80666   | 14 | 64066395  | missense | C | T | 0.110 | p.C89Y   |
| 150 | <i>WDR89</i>    | 80666   | 14 | 64066398  | missense | G | C | 0.114 | p.A88G   |
| 150 | <i>WDR89</i>    | 80666   | 14 | 64066402  | missense | A | G | 0.103 | p.S87P   |
| 150 | <i>SNW1</i>     | 12245   | 14 | 78202302  | missense | A | T | 0.063 | p.V229D  |
| 150 | <i>HSP90AA1</i> | 5348    | 14 | 102551278 | missense | T | C | 0.177 | p.K363E  |
| 150 | <i>CCNB2</i>    | 4701    | 15 | 59406704  | missense | C | T | 0.124 | p.S110F  |
| 150 | <i>C16orf59</i> | 25108   | 16 | 2514581   | missense | G | C | 0.080 | p.W405S  |
| 150 | <i>GTF3C1</i>   | 1520    | 16 | 27480623  | missense | A | G | 0.108 | p.L1688P |
| 150 | <i>NLRC5</i>    | 32206   | 16 | 57060237  | missense | G | A | 0.193 | p.G461E  |
| 150 | <i>HYDIN</i>    | 1270974 | 16 | 70894662  | missense | C | T | 0.221 | p.G3974R |
| 150 | <i>CDH15</i>    | 4933    | 16 | 89245863  | missense | C | T | 0.089 | p.P28S   |
| 150 | <i>RAI1</i>     | 30665   | 17 | 17697096  | missense | G | C | 0.082 | p.Q278H  |
| 150 | <i>CNTNAP1</i>  | 3632    | 17 | 40838074  | missense | G | A | 0.151 | p.G272D  |
| 150 | <i>CDH2</i>     | 1792    | 18 | 25585862  | missense | C | A | 0.080 | p.E266D  |
| 150 | <i>CELF4</i>    | 20180   | 18 | 34853104  | missense | A | G | 0.121 | p.L275P  |
| 150 | <i>ELANE</i>    | 1972    | 19 | 852389    | missense | C | A | 0.069 | p.L21M   |
| 150 | <i>ZNF565</i>   | 152477  | 19 | 36673426  | missense | C | T | 0.132 | p.G481E  |
| 150 | <i>DYRK1B</i>   | 6484    | 19 | 40316528  | missense | C | T | 0.125 | p.A545T  |
| 150 | <i>NUMBL</i>    | 4756    | 19 | 41186857  | missense | A | G | 0.056 | p.W169R  |
| 150 | <i>PINLYP</i>   | 1193621 | 19 | 44081333  | missense | A | G | 0.060 | p.D21G   |
| 150 | <i>TMC4</i>     | 144686  | 19 | 54668319  | missense | G | A | 0.066 | p.T321I  |
| 150 | <i>FCAR</i>     | 133279  | 19 | 55399635  | missense | G | A | 0.100 | p.S208N  |
| 150 | <i>ZNF787</i>   | 1002836 | 19 | 56600081  | missense | C | T | 0.108 | p.D154N  |
| 150 | <i>ZNF787</i>   | 1002836 | 19 | 56600086  | missense | C | G | 0.108 | p.C152S  |
| 150 | <i>MCM8</i>     | 182802  | 20 | 5948171   | missense | G | A | 0.081 | p.S322N  |
| 150 | <i>SSTR4</i>    | 1052    | 20 | 23016698  | missense | G | A | 0.071 | p.G193D  |
| 150 | <i>PYGB</i>     | 2862    | 20 | 25273134  | missense | C | T | 0.098 | p.L688F  |
| 150 | <i>ERGIC3</i>   | 198398  | 20 | 34136300  | missense | G | A | 0.106 | p.R167H  |
| 150 | <i>SMTN</i>     | 134270  | 22 | 31487142  | missense | C | A | 0.103 | p.S378Y  |
| 150 | <i>GTSE1</i>    | 16426   | 22 | 46704274  | missense | G | T | 0.135 | p.A66S   |
| 150 | <i>CHKB</i>     | 5198    | 22 | 51021156  | missense | C | T | 0.138 | p.A19T   |
| 150 | <i>MSL3</i>     | 78629   | X  | 11776437  | missense | T | A | 0.108 | p.C19S   |
| 150 | <i>KLHL15</i>   | 30624   | X  | 24006592  | missense | C | T | 0.128 | p.G421R  |
| 150 | <i>DMD</i>      | 4012    | X  | 32407676  | missense | G | A | 0.050 | p.A1364V |
| 150 | <i>CCNB3</i>    | 33670   | X  | 50089691  | missense | G | A | 0.128 | p.C1232Y |
| 150 | <i>FAM104B</i>  | 138362  | X  | 55172647  | missense | G | A | 0.051 | p.P73L   |
| 150 | <i>FAM104B</i>  | 138362  | X  | 55172686  | missense | C | T | 0.103 | p.S60N   |

|      |                     |         |    |           |          |   |   |       |           |
|------|---------------------|---------|----|-----------|----------|---|---|-------|-----------|
| 150  | <i>FAM104B</i>      | 138362  | X  | 55172689  | missense | G | T | 0.108 | p.A59E    |
| 150  | <i>STARDB8</i>      | 14725   | X  | 67942372  | missense | A | C | 0.088 | p.S895R   |
| 3334 | <i>PARM1</i>        | 15393   | 4  | 75937882  | stopgain | G | A | 0.140 | p.W97X    |
| 3334 | <i>B3GALT4</i>      | 3782    | 6  | 33246307  | stopgain | C | T | 0.056 | p.R371X   |
| 3334 | <i>MYB</i>          | 5375    | 6  | 135520050 | stopgain | T | G | 0.164 | p.L508X   |
| 3334 | <i>ZNF394</i>       | 32164   | 7  | 99097571  | stopgain | C | T | 0.196 | p.W49X    |
| 3334 | <i>CUL2</i>         | 3591    | 10 | 35349875  | stopgain | G | A | 0.174 | p.Q82X    |
| 3334 | <i>POLR3B</i>       | 18082   | 12 | 106857344 | stopgain | C | T | 0.143 | p.Q887X   |
| 3334 | <i>MGA</i>          | 1164273 | 15 | 41989087  | stopgain | C | T | 0.121 | p.R627X   |
| 3334 | <i>IGDCC3</i>       | 4884    | 15 | 65624427  | stopgain | G | A | 0.125 | p.Q334X   |
| 3334 | <i>FGF16</i>        | 3868    | X  | 76711924  | stopgain | C | T | 0.152 | p.R88X    |
| 3334 | <i>UBXN11</i>       | 183008  | 1  | 26608897  | missense | A | T | 0.056 | p.C486S   |
| 3334 | <i>PTPRU</i>        | 133178  | 1  | 29587289  | missense | C | A | 0.071 | p.Q340K   |
| 3334 | <i>SPOCD1</i>       | 144569  | 1  | 32257864  | missense | G | T | 0.160 | p.P972T   |
| 3334 | <i>APH1A</i>        | 16022   | 1  | 150240375 | missense | G | A | 0.051 | p.A89V    |
| 3334 | <i>LY9</i>          | 1033667 | 1  | 160771648 | missense | G | A | 0.065 | p.G175S   |
| 3334 | <i>IPO9</i>         | 18085   | 1  | 201798384 | missense | C | A | 0.129 | p.P16Q    |
| 3334 | <i>OR6F1</i>        | 1005286 | 1  | 247875510 | missense | G | A | 0.324 | p.P183L   |
| 3334 | <i>TTN</i>          | 133437  | 2  | 179500421 | missense | A | G | 0.167 | p.V13877A |
| 3334 | <i>ADAMTS9</i>      | 182920  | 3  | 64547324  | missense | G | A | 0.167 | p.P1543L  |
| 3334 | <i>C3orf38</i>      | 173824  | 3  | 88202433  | missense | C | T | 0.091 | p.R63C    |
| 3334 | <i>MMRN1</i>        | 7351    | 4  | 90874325  | missense | A | G | 0.167 | p.K1148R  |
| 3334 | <i>8-Sep</i>        | 15146   | 5  | 132099521 | missense | C | A | 0.073 | p.K137N   |
| 3334 | <i>OR2B6</i>        | 12367   | 6  | 27925134  | missense | T | C | 0.171 | p.I39T    |
| 3334 | <i>GPR115</i>       | 153838  | 6  | 47682045  | missense | A | C | 0.113 | p.K355T   |
| 3334 | <i>LRRC1</i>        | 18214   | 6  | 53787434  | missense | G | A | 0.225 | p.R473K   |
| 3334 | <i>PCLO</i>         | 33026   | 7  | 82545660  | missense | G | A | 0.168 | p.P3881L  |
| 3334 | <i>NRCAM</i>        | 5010    | 7  | 107880468 | missense | G | A | 0.093 | p.A14V    |
| 3334 | <i>PDIA4</i>        | 4911    | 7  | 148718202 | missense | C | A | 0.091 | p.E42D    |
| 3334 | <i>ZNF395</i>       | 18660   | 8  | 28210123  | missense | C | T | 0.091 | p.G296D   |
| 3334 | <i>COLEC10</i>      | 6438    | 8  | 120118317 | missense | G | A | 0.074 | p.D241N   |
| 3334 | <i>LOC100506422</i> | 1004352 | 9  | 26114415  | missense | G | T | 0.269 | p.R85L    |
| 3334 | <i>KCNK4</i>        | 33310   | 11 | 64067005  | missense | C | T | 0.154 | p.S330F   |
| 3334 | <i>RSF1</i>         | 16578   | 11 | 77413349  | missense | T | C | 0.200 | p.K309E   |
| 3334 | <i>ASUN</i>         | 18164   | 12 | 27077302  | missense | T | C | 0.227 | p.N264D   |
| 3334 | <i>CTDSP2</i>       | 5730    | 12 | 58217763  | missense | C | T | 0.163 | p.R205H   |
| 3334 | <i>CTDSP2</i>       | 5730    | 12 | 58217770  | missense | G | T | 0.123 | p.L2031   |
| 3334 | <i>IL22</i>         | 20525   | 12 | 68646579  | missense | G | A | 0.063 | p.R73C    |
| 3334 | <i>OTOGL</i>        | 173591  | 12 | 80722476  | missense | A | T | 0.182 | p.N1402Y  |
| 3334 | <i>HSP90B1</i>      | 3299    | 12 | 104341190 | missense | A | T | 0.114 | p.E788D   |
| 3334 | <i>KCTD4</i>        | 198404  | 13 | 45768286  | missense | C | A | 0.051 | p.E139D   |
| 3334 | <i>SFTA3</i>        | 1101341 | 14 | 36946284  | missense | C | G | 0.173 | p.K51N    |
| 3334 | <i>PPP1R13B</i>     | 15316   | 14 | 104263737 | missense | C | A | 0.074 | p.C43F    |
| 3334 | <i>ZNF106</i>       | 22473   | 15 | 42727643  | missense | C | T | 0.220 | p.G812E   |
| 3334 | <i>ATP8B4</i>       | 24837   | 15 | 50226220  | missense | T | C | 0.118 | p.S483G   |
| 3334 | <i>ALPK3</i>        | 20778   | 15 | 85400798  | missense | G | T | 0.321 | p.E1145D  |
| 3334 | <i>HYDIN</i>        | 1270974 | 16 | 70942236  | missense | A | G | 0.270 | p.F2772S  |
| 3334 | <i>RAI1</i>         | 30665   | 17 | 17697096  | missense | G | C | 0.190 | p.Q278H   |
| 3334 | <i>WNT3</i>         | 30753   | 17 | 44845945  | missense | G | A | 0.138 | p.T270M   |
| 3334 | <i>WNT3</i>         | 30753   | 17 | 44846063  | missense | C | T | 0.051 | p.G231S   |
| 3334 | <i>KIAA1328</i>     | 20776   | 18 | 34647247  | missense | C | T | 0.062 | p.T324I   |
| 3334 | <i>CCDC68</i>       | 25214   | 18 | 52604147  | missense | C | T | 0.243 | p.V130M   |
| 3334 | <i>SNRPA</i>        | 4596    | 19 | 41265406  | missense | G | A | 0.078 | p.R106H   |
| 3334 | <i>ZNF71</i>        | 21216   | 19 | 57133622  | missense | G | A | 0.091 | p.E323K   |
| 3334 | <i>SNPH</i>         | 14723   | 20 | 1286258   | missense | C | T | 0.085 | p.P349S   |
| 3334 | <i>PKIG</i>         | 181805  | 20 | 43243324  | missense | G | A | 0.200 | p.G43S    |
| 3334 | <i>ALG12</i>        | 24105   | 22 | 50307034  | missense | T | C | 0.192 | p.I98M    |
| 3334 | <i>FAM104B</i>      | 138362  | X  | 55172686  | missense | C | T | 0.118 | p.S60N    |
| 3334 | <i>FAM104B</i>      | 138362  | X  | 55172689  | missense | G | T | 0.071 | p.A59E    |
| 3334 | <i>TAF1</i>         | 138923  | X  | 70618475  | missense | G | A | 0.133 | p.R1224Q  |
| 3334 | <i>KLHL13</i>       | 33495   | X  | 117043737 | missense | G | A | 0.073 | p.T282M   |
| 8170 | <i>EMC1</i>         | 15047   | 1  | 19561648  | stopgain | C | A | 0.222 | p.E470X   |
| 8170 | <i>FEZF2</i>        | 18008   | 3  | 62358300  | stopgain | C | A | 0.242 | p.E82X    |
| 8170 | <i>PLEKHG6</i>      | 18173   | 12 | 6436519   | stopgain | C | A | 0.053 | p.Y590X   |
| 8170 | <i>PDE4DIP</i>      | 14644   | 1  | 144882693 | missense | A | C | 0.222 | p.L1109R  |
| 8170 | <i>C1orf110</i>     | 178550  | 1  | 162824587 | missense | T | G | 0.222 | p.N293H   |
| 8170 | <i>NR4A2</i>        | 6186    | 2  | 157186023 | missense | T | C | 0.054 | p.K226E   |
| 8170 | <i>XIRP2</i>        | 152381  | 2  | 168107303 | missense | A | T | 0.143 | p.E3134V  |
| 8170 | <i>HOXD12</i>       | 21193   | 2  | 176964806 | missense | G | A | 0.232 | p.G93R    |
| 8170 | <i>ZNF804A</i>      | 194250  | 2  | 185802966 | missense | A | T | 0.214 | p.K948M   |
| 8170 | <i>HJURP</i>        | 18410   | 2  | 234749858 | missense | G | A | 0.206 | p.S523L   |
| 8170 | <i>CCDC80</i>       | 199512  | 3  | 112324500 | missense | C | T | 0.160 | p.G873R   |
| 8170 | <i>SHROOM3</i>      | 20859   | 4  | 77661420  | missense | C | A | 0.083 | p.N698K   |
| 8170 | <i>PRKG2</i>        | 6259    | 4  | 82125772  | missense | A | G | 0.211 | p.F144L   |
| 8170 | <i>WDFY3</i>        | 14991   | 4  | 85741281  | missense | C | T | 0.261 | p.M550I   |
| 8170 | <i>IRF2</i>         | 2199    | 4  | 185320210 | missense | T | C | 0.231 | p.S185G   |
| 8170 | <i>FAM193B</i>      | 1190946 | 5  | 176963483 | missense | G | A | 0.138 | p.P318S   |
| 8170 | <i>FAM8A1</i>       | 16255   | 6  | 17601035  | missense | A | G | 0.131 | p.H132R   |
| 8170 | <i>FAM8A1</i>       | 16255   | 6  | 17601040  | missense | G | A | 0.138 | p.G134S   |
| 8170 | <i>FAM8A1</i>       | 16255   | 6  | 17601041  | missense | G | T | 0.138 | p.G134V   |
| 8170 | <i>FAM8A1</i>       | 16255   | 6  | 17601044  | missense | T | C | 0.143 | p.L135P   |

|      |                 |         |    |           |          |   |   |       |          |
|------|-----------------|---------|----|-----------|----------|---|---|-------|----------|
| 8170 | <i>FAM8A1</i>   | 16255   | 6  | 17601058  | missense | G | A | 0.167 | p.A140T  |
| 8170 | <i>FAM8A1</i>   | 16255   | 6  | 17601086  | missense | A | G | 0.104 | p.Q149R  |
| 8170 | <i>URGCP</i>    | 17920   | 7  | 43916996  | missense | C | A | 0.077 | p.R646L  |
| 8170 | <i>RBM33</i>    | 53043   | 7  | 155504093 | missense | C | G | 0.213 | p.P382R  |
| 8170 | <i>XKR5</i>     | 207411  | 8  | 6669536   | missense | C | T | 0.302 | p.G252E  |
| 8170 | <i>DUSP26</i>   | 24025   | 8  | 33451125  | missense | G | A | 0.295 | p.S121L  |
| 8170 | <i>PLEC</i>     | 201384  | 8  | 144993140 | missense | G | A | 0.161 | p.R3644C |
| 8170 | <i>VWA2</i>     | 1272046 | 10 | 116045791 | missense | T | A | 0.312 | p.V364D  |
| 8170 | <i>TSPAN18</i>  | 130783  | 11 | 44931338  | missense | C | G | 0.257 | p.P49R   |
| 8170 | <i>CHD4</i>     | 1297553 | 12 | 6710853   | missense | C | T | 0.143 | p.R173Q  |
| 8170 | <i>REERG</i>    | 32918   | 12 | 15274026  | missense | C | T | 0.154 | p.R30Q   |
| 8170 | <i>CTDSP2</i>   | 5730    | 12 | 58217763  | missense | C | T | 0.221 | p.R205H  |
| 8170 | <i>CTDSP2</i>   | 5730    | 12 | 58220819  | missense | A | G | 0.154 | p.V105A  |
| 8170 | <i>CTDSP2</i>   | 5730    | 12 | 58220831  | missense | C | G | 0.200 | p.R101T  |
| 8170 | <i>SOX1</i>     | 5986    | 13 | 112722212 | missense | G | T | 0.267 | p.E80D   |
| 8170 | <i>WDR89</i>    | 80666   | 14 | 64066395  | missense | C | T | 0.200 | p.C89Y   |
| 8170 | <i>WDR89</i>    | 80666   | 14 | 64066398  | missense | G | C | 0.226 | p.A88G   |
| 8170 | <i>WDR89</i>    | 80666   | 14 | 64066402  | missense | A | G | 0.226 | p.S87P   |
| 8170 | <i>CEP170B</i>  | 15005   | 14 | 105349647 | missense | G | A | 0.320 | p.D285N  |
| 8170 | <i>HYDIN</i>    | 1270974 | 16 | 70913372  | missense | C | T | 0.136 | p.R3462Q |
| 8170 | <i>SLC46A1</i>  | 80669   | 17 | 26731702  | missense | C | T | 0.114 | p.G338D  |
| 8170 | <i>KIF2B</i>    | 32559   | 17 | 51901403  | missense | T | A | 0.182 | p.F337I  |
| 8170 | <i>RNF213</i>   | 1256071 | 17 | 78313316  | missense | A | G | 0.279 | p.R1717G |
| 8170 | <i>KLAA1683</i> | 25249   | 19 | 18377556  | missense | G | A | 0.289 | p.T265I  |
| 8170 | <i>ZNF573</i>   | 152360  | 19 | 38230261  | missense | T | C | 0.227 | p.Q319R  |
| 8170 | <i>PTOV1</i>    | 17432   | 19 | 50363244  | missense | C | T | 0.069 | p.A348V  |
| 8170 | <i>FPR2</i>     | 1462    | 19 | 52272390  | missense | T | G | 0.231 | p.V160G  |
| 8170 | <i>CDC25B</i>   | 21873   | 20 | 3781963   | missense | C | A | 0.111 | p.F256L  |
| 8170 | <i>DLGAP4</i>   | 183006  | 20 | 35125345  | missense | C | A | 0.055 | p.A629D  |
| 8170 | <i>FAM104B</i>  | 1166703 | X  | 55172521  | missense | G | T | 0.061 | p.T114K  |
| 8173 | <i>TTC39A</i>   | 1297667 | 1  | 51753881  | missense | T | C | 0.100 | p.K597R  |
| 8173 | <i>TNN</i>      | 22093   | 1  | 175048576 | missense | G | A | 0.182 | p.G173R  |
| 8173 | <i>ARL8A</i>    | 138795  | 1  | 202107501 | missense | T | A | 0.105 | p.I67F   |
| 8173 | <i>USP40</i>    | 18218   | 2  | 234394436 | missense | C | T | 0.323 | p.E1140K |
| 8173 | <i>ZBTB2</i>    | 20861   | 6  | 151687729 | missense | C | A | 0.138 | p.D158Y  |
| 8173 | <i>ANKMY2</i>   | 20319   | 7  | 16642097  | missense | C | G | 0.211 | p.W350S  |
| 8173 | <i>UPK3B</i>    | 182684  | 7  | 76144462  | missense | G | A | 0.116 | p.A258T  |
| 8173 | <i>NEFL</i>     | 6158    | 8  | 24813869  | missense | C | T | 0.265 | p.R54H   |
| 8173 | <i>PXDNL</i>    | 144651  | 8  | 52321782  | missense | C | T | 0.114 | p.R801H  |
| 8173 | <i>ZHX2</i>     | 14943   | 8  | 123966106 | missense | G | A | 0.078 | p.E786K  |
| 8173 | <i>ZNF34</i>    | 30580   | 8  | 145998654 | missense | C | A | 0.089 | p.M560I  |
| 8173 | <i>C9orf47</i>  | 1142413 | 9  | 91606466  | missense | C | A | 0.105 | p.P91T   |
| 8173 | <i>PITPNM1</i>  | 4910    | 11 | 67264870  | missense | G | T | 0.111 | p.P660T  |
| 8173 | <i>IGHMBP2</i>  | 2180    | 11 | 68700804  | missense | C | A | 0.211 | p.R425S  |
| 8173 | <i>CBL</i>      | 5188    | 11 | 119170416 | missense | G | C | 0.089 | p.Q882H  |
| 8173 | <i>DHH</i>      | 21044   | 12 | 49488109  | missense | C | A | 0.091 | p.A63S   |
| 8173 | <i>CTDSP2</i>   | 5730    | 12 | 58217698  | missense | G | T | 0.101 | p.P227T  |
| 8173 | <i>CTDSP2</i>   | 5730    | 12 | 58217763  | missense | C | T | 0.241 | p.R205H  |
| 8173 | <i>CTDSP2</i>   | 5730    | 12 | 58220811  | missense | G | T | 0.135 | p.L108I  |
| 8173 | <i>CTDSP2</i>   | 5730    | 12 | 58220819  | missense | A | G | 0.171 | p.V105A  |
| 8173 | <i>RYR3</i>     | 1243996 | 15 | 34077881  | missense | C | T | 0.148 | p.T3096M |
| 8173 | <i>CCDC42</i>   | 144681  | 17 | 8644794   | missense | C | T | 0.083 | p.E164K  |
| 8173 | <i>CCDC47</i>   | 20198   | 17 | 61843370  | missense | G | A | 0.227 | p.R56W   |
| 8173 | <i>ST8SLA3</i>  | 15879   | 18 | 55027261  | missense | T | C | 0.182 | p.L299P  |
| 8173 | <i>ZNF414</i>   | 32370   | 19 | 8577341   | missense | C | T | 0.087 | p.E154K  |
| 8173 | <i>MYO9B</i>    | 4145    | 19 | 17273175  | missense | G | T | 0.143 | p.D479Y  |
| 8173 | <i>PSENE1</i>   | 172341  | 19 | 36237617  | missense | C | A | 0.083 | p.R59S   |
| 8173 | <i>DNMT3B</i>   | 175850  | 20 | 31380479  | missense | C | G | 0.075 | p.D335E  |
| 8173 | <i>MYH7B</i>    | 20884   | 20 | 33573984  | missense | G | A | 0.114 | p.R338K  |
| 8173 | <i>NOL12</i>    | 24313   | 22 | 38087309  | missense | G | A | 0.077 | p.R203H  |
| 8173 | <i>ZBED4</i>    | 14838   | 22 | 50279073  | missense | G | A | 0.073 | p.R588Q  |
| 8173 | <i>FAM104B</i>  | 1166703 | X  | 55172521  | missense | G | T | 0.056 | p.T114K  |
| 8173 | <i>FAM104B</i>  | 138362  | X  | 55172686  | missense | C | T | 0.295 | p.S60N   |
| 8173 | <i>FAM104B</i>  | 138362  | X  | 55172689  | missense | G | T | 0.295 | p.A59E   |
| 8173 | <i>FAM155B</i>  | 15686   | X  | 68725798  | missense | A | C | 0.077 | p.M225L  |
| 8178 | <i>ZNF148</i>   | 21964   | 3  | 124951522 | stopgain | G | T | 0.111 | p.S683X  |
| 8178 | <i>NPHP4</i>    | 15102   | 1  | 5924014   | missense | C | T | 0.080 | p.R1359Q |
| 8178 | <i>MAP3K6</i>   | 4672    | 1  | 27683892  | missense | G | A | 0.051 | p.A1086V |
| 8178 | <i>GRIK3</i>    | 831     | 1  | 37307363  | missense | C | T | 0.051 | p.G502S  |
| 8178 | <i>GNL2</i>     | 13285   | 1  | 38053006  | missense | C | A | 0.152 | p.D159Y  |
| 8178 | <i>MAST2</i>    | 15112   | 1  | 46489620  | missense | G | T | 0.065 | p.R583L  |
| 8178 | <i>CACHD1</i>   | 20925   | 1  | 65141112  | missense | G | A | 0.065 | p.S868N  |
| 8178 | <i>SMG7</i>     | 201569  | 1  | 183522153 | missense | G | T | 0.070 | p.Q1118H |
| 8178 | <i>C2orf16</i>  | 32266   | 2  | 27802410  | missense | T | A | 0.085 | p.S991T  |
| 8178 | <i>FBXO11</i>   | 25133   | 2  | 48059946  | missense | G | A | 0.093 | p.P288L  |
| 8178 | <i>UGT1A1</i>   | 463     | 2  | 234669666 | missense | C | G | 0.051 | p.Q245E  |
| 8178 | <i>DSPP</i>     | 14208   | 4  | 88537243  | missense | C | A | 0.204 | p.D1143E |
| 8178 | <i>FAM81B</i>   | 152548  | 5  | 94784119  | missense | A | T | 0.174 | p.E392D  |
| 8178 | <i>JADE2</i>    | 15288   | 5  | 133909450 | missense | G | A | 0.051 | p.R517Q  |
| 8178 | <i>DSP</i>      | 4415    | 6  | 7583880   | missense | A | C | 0.121 | p.I2129L |
| 8178 | <i>MUC22</i>    | 1198815 | 6  | 30997575  | missense | C | A | 0.075 | p.T1456N |

|      |                  |         |    |           |          |   |   |       |          |
|------|------------------|---------|----|-----------|----------|---|---|-------|----------|
| 8178 | <i>MUC17</i>     | 1040105 | 7  | 100675423 | missense | A | C | 0.098 | p.E242D  |
| 8178 | <i>CPA6</i>      | 20361   | 8  | 68396943  | missense | C | T | 0.111 | p.V240I  |
| 8178 | <i>PHF20L1</i>   | 16018   | 8  | 133851694 | missense | G | A | 0.093 | p.G752R  |
| 8178 | <i>EPPK1</i>     | 31308   | 8  | 144943229 | missense | T | A | 0.054 | p.K1398M |
| 8178 | <i>AFAP1L2</i>   | 32550   | 10 | 116056820 | missense | G | T | 0.083 | p.P836T  |
| 8178 | <i>CTBP2</i>     | 22802   | 10 | 126692019 | missense | G | A | 0.087 | p.P34L   |
| 8178 | <i>HPX</i>       | 613     | 11 | 6461433   | missense | C | T | 0.065 | p.A100T  |
| 8178 | <i>ZBED5</i>     | 21211   | 11 | 10875889  | missense | A | C | 0.075 | p.Y202D  |
| 8178 | <i>CTDSP2</i>    | 5730    | 12 | 58217763  | missense | C | T | 0.175 | p.R205H  |
| 8178 | <i>CTDSP2</i>    | 5730    | 12 | 58217770  | missense | G | C | 0.078 | p.L203V  |
| 8178 | <i>CTDSP2</i>    | 5730    | 12 | 58220831  | missense | C | G | 0.162 | p.R101T  |
| 8178 | <i>DCN</i>       | 133507  | 12 | 91572272  | missense | G | C | 0.085 | p.Q20E   |
| 8178 | <i>NIPA2</i>     | 30922   | 15 | 23006777  | missense | G | T | 0.075 | p.T176K  |
| 8178 | <i>ZNF646</i>    | 14699   | 16 | 31089060  | missense | G | A | 0.053 | p.R472H  |
| 8178 | <i>CDH3</i>      | 1793    | 16 | 68716208  | missense | G | A | 0.085 | p.E334K  |
| 8178 | <i>MFSD11</i>    | 24311   | 17 | 74735075  | missense | G | A | 0.111 | p.S51N   |
| 8178 | <i>RNF213</i>    | 1256071 | 17 | 78350182  | missense | G | A | 0.087 | p.V4423M |
| 8178 | <i>CCDC57</i>    | 198082  | 17 | 80159490  | missense | T | C | 0.065 | p.R111G  |
| 8178 | <i>SETBP1</i>    | 15559   | 18 | 42532709  | missense | C | A | 0.051 | p.P1135H |
| 8178 | <i>RYR1</i>      | 540     | 19 | 39014559  | missense | G | T | 0.074 | p.G3482V |
| 8178 | <i>GRIN2D</i>    | 836     | 19 | 48917724  | missense | T | C | 0.105 | p.L432P  |
| 8178 | <i>NUCB1</i>     | 6184    | 19 | 49404175  | missense | C | T | 0.050 | p.A41V   |
| 8178 | <i>ZNF616</i>    | 178523  | 19 | 52619155  | missense | C | T | 0.114 | p.R421H  |
| 8178 | <i>TPST2</i>     | 3595    | 22 | 26936774  | missense | C | T | 0.057 | p.G275S  |
| 8181 | <i>CYP20A1</i>   | 177538  | 2  | 204131263 | stopgain | G | A | 0.158 | p.W153X  |
| 8181 | <i>FAT3</i>      | 1008781 | 11 | 92086907  | stopgain | C | G | 0.132 | p.Y543X  |
| 8181 | <i>RAPGEFL1</i>  | 16339   | 17 | 38340881  | stopgain | C | T | 0.161 | p.R56X   |
| 8181 | <i>LRRC7</i>     | 20794   | 1  | 70504679  | missense | A | G | 0.191 | p.K1020E |
| 8181 | <i>GEN1</i>      | 182625  | 2  | 17961322  | missense | G | A | 0.067 | p.A448T  |
| 8181 | <i>LOC728819</i> | 1101330 | 2  | 43902548  | missense | A | G | 0.081 | p.V305A  |
| 8181 | <i>TTN</i>       | 133378  | 2  | 179579126 | missense | G | T | 0.182 | p.A8792E |
| 8181 | <i>NMUR1</i>     | 6056    | 2  | 232393181 | missense | G | A | 0.248 | p.A184V  |
| 8181 | <i>STAC</i>      | 3149    | 3  | 36484906  | missense | C | A | 0.219 | p.S54R   |
| 8181 | <i>SLC22A13</i>  | 4256    | 3  | 38307470  | missense | T | A | 0.150 | p.V40D   |
| 8181 | <i>SCN11A</i>    | 14139   | 3  | 38888425  | missense | C | T | 0.062 | p.M1712I |
| 8181 | <i>SLC26A6</i>   | 134426  | 3  | 48665879  | missense | C | A | 0.167 | p.K596N  |
| 8181 | <i>RASSF1</i>    | 170714  | 3  | 50375431  | missense | T | G | 0.083 | p.T92P   |
| 8181 | <i>ZNF717</i>    | 1290209 | 3  | 75788230  | missense | C | T | 0.097 | p.V132I  |
| 8181 | <i>GSK3B</i>     | 2093    | 3  | 119582276 | missense | G | T | 0.053 | p.F375L  |
| 8181 | <i>CHST13</i>    | 152889  | 3  | 126261189 | missense | G | A | 0.069 | p.G265D  |
| 8181 | <i>RHO</i>       | 539     | 3  | 129247854 | missense | G | C | 0.056 | p.S93T   |
| 8181 | <i>RHO</i>       | 539     | 3  | 129249830 | missense | C | T | 0.062 | p.A158V  |
| 8181 | <i>RHO</i>       | 539     | 3  | 129249841 | missense | G | A | 0.068 | p.V162I  |
| 8181 | <i>RHO</i>       | 539     | 3  | 129251457 | missense | G | T | 0.109 | p.A260S  |
| 8181 | <i>RHO</i>       | 539     | 3  | 129251458 | missense | C | T | 0.109 | p.A260V  |
| 8181 | <i>RHO</i>       | 539     | 3  | 129251475 | missense | G | C | 0.105 | p.V266L  |
| 8181 | <i>ZIC1</i>      | 3412    | 3  | 147131192 | missense | G | A | 0.208 | p.G400S  |
| 8181 | <i>GUF1</i>      | 21927   | 4  | 44688015  | missense | C | A | 0.058 | p.Q237K  |
| 8181 | <i>FRAS1</i>     | 25074   | 4  | 79366841  | missense | T | G | 0.152 | p.I1944S |
| 8181 | <i>FRAS1</i>     | 25074   | 4  | 79366855  | missense | A | T | 0.143 | p.I1949F |
| 8181 | <i>ASIC5</i>     | 17419   | 4  | 156763420 | missense | C | A | 0.057 | p.L316F  |
| 8181 | <i>EXOC3</i>     | 7277    | 5  | 459572    | missense | C | A | 0.051 | p.S463R  |
| 8181 | <i>GPR98</i>     | 32119   | 5  | 90079810  | missense | C | T | 0.113 | p.P4530L |
| 8181 | <i>SYCP2L</i>    | 1040274 | 6  | 10955396  | missense | G | A | 0.145 | p.E668K  |
| 8181 | <i>BTN2A1</i>    | 78476   | 6  | 26463551  | missense | G | C | 0.174 | p.W170C  |
| 8181 | <i>HTR1B</i>     | 863     | 6  | 78172069  | missense | A | G | 0.176 | p.F351S  |
| 8181 | <i>MAS1</i>      | 2377    | 6  | 160328915 | missense | C | T | 0.069 | p.R310W  |
| 8181 | <i>GIGYF1</i>    | 22574   | 7  | 100283069 | missense | C | T | 0.114 | p.E364K  |
| 8181 | <i>RALYL</i>     | 173848  | 8  | 85799868  | missense | C | G | 0.176 | p.L239V  |
| 8181 | <i>CNGB3</i>     | 19098   | 8  | 87680379  | missense | G | A | 0.184 | p.P171S  |
| 8181 | <i>MAPK15</i>    | 139021  | 8  | 144801025 | missense | C | T | 0.106 | p.R123W  |
| 8181 | <i>UNC13B</i>    | 6377    | 9  | 35382377  | missense | A | C | 0.173 | p.K811T  |
| 8181 | <i>TMOD1</i>     | 3275    | 9  | 100325079 | missense | A | G | 0.235 | p.I155V  |
| 8181 | <i>ITGA8</i>     | 3638    | 10 | 15649813  | missense | G | T | 0.167 | p.Q543K  |
| 8181 | <i>CTBP2</i>     | 22802   | 10 | 126686646 | missense | C | G | 0.103 | p.W151S  |
| 8181 | <i>CTBP2</i>     | 22802   | 10 | 126686649 | missense | G | C | 0.100 | p.T150R  |
| 8181 | <i>CTBP2</i>     | 22802   | 10 | 126686656 | missense | T | C | 0.098 | p.R148G  |
| 8181 | <i>CTBP2</i>     | 22802   | 10 | 126686659 | missense | G | A | 0.091 | p.R147W  |
| 8181 | <i>OR51E2</i>    | 30774   | 11 | 4703451   | missense | C | T | 0.143 | p.R164Q  |
| 8181 | <i>ORAOV1</i>    | 153451  | 11 | 69482763  | missense | A | G | 0.088 | p.L82S   |
| 8181 | <i>CTDSP2</i>    | 5730    | 12 | 58217698  | missense | G | T | 0.104 | p.P227T  |
| 8181 | <i>CTDSP2</i>    | 5730    | 12 | 58217770  | missense | G | T | 0.068 | p.L203I  |
| 8181 | <i>CTDSP2</i>    | 5730    | 12 | 58220801  | missense | G | T | 0.067 | p.T111N  |
| 8181 | <i>CTDSP2</i>    | 5730    | 12 | 58220811  | missense | G | T | 0.074 | p.L108I  |
| 8181 | <i>CTDSP2</i>    | 5730    | 12 | 58220831  | missense | C | G | 0.084 | p.R101T  |
| 8181 | <i>CTDSP2</i>    | 5730    | 12 | 58240188  | missense | G | A | 0.149 | p.R11W   |
| 8181 | <i>WDR89</i>     | 80666   | 14 | 64066352  | missense | T | A | 0.052 | p.R103S  |
| 8181 | <i>WDR89</i>     | 80666   | 14 | 64066395  | missense | C | T | 0.065 | p.C89Y   |
| 8181 | <i>WDR89</i>     | 80666   | 14 | 64066398  | missense | G | C | 0.065 | p.A88G   |
| 8181 | <i>WDR89</i>     | 80666   | 14 | 64066402  | missense | A | G | 0.064 | p.S87P   |
| 8181 | <i>ATXN3</i>     | 30660   | 14 | 92537397  | missense | T | C | 0.066 | p.T130A  |

|      |                 |         |    |           |          |   |   |       |           |
|------|-----------------|---------|----|-----------|----------|---|---|-------|-----------|
| 8181 | <i>FRMD5</i>    | 32892   | 15 | 44487176  | missense | T | C | 0.193 | p.D26G    |
| 8181 | <i>SKOR1</i>    | 1258024 | 15 | 68114480  | missense | G | A | 0.160 | p.R81K    |
| 8181 | <i>CAPN15</i>   | 5632    | 16 | 602977    | missense | A | C | 0.225 | p.S1007R  |
| 8181 | <i>HYDIN</i>    | 1270974 | 16 | 71052037  | missense | C | G | 0.200 | p.Q1213H  |
| 8181 | <i>MTCL1</i>    | 15210   | 18 | 8825233   | missense | C | A | 0.193 | p.S1242Y  |
| 8181 | <i>CCDC178</i>  | 198995  | 18 | 30847231  | missense | G | C | 0.180 | p.L403V   |
| 8181 | <i>RGL3</i>     | 1161616 | 19 | 11517249  | missense | C | T | 0.183 | p.R281Q   |
| 8181 | <i>ZNF441</i>   | 152355  | 19 | 11891996  | missense | G | A | 0.077 | p.G453R   |
| 8181 | <i>ANKLE1</i>   | 1278444 | 19 | 17397489  | missense | G | T | 0.178 | p.V641L   |
| 8181 | <i>SLC7A9</i>   | 14270   | 19 | 33333154  | missense | C | T | 0.109 | p.A382T   |
| 8181 | <i>ZNF283</i>   | 181845  | 19 | 44351795  | missense | A | G | 0.091 | p.K348E   |
| 8181 | <i>KIR2DL3</i>  | 15868   | 19 | 55263673  | missense | G | T | 0.073 | p.V276F   |
| 8181 | <i>PXMP4</i>    | 7238    | 20 | 32298434  | missense | G | A | 0.144 | p.P101L   |
| 8181 | <i>ADRM1</i>    | 175573  | 20 | 60883218  | missense | C | T | 0.077 | p.S333L   |
| 8181 | <i>STS</i>      | 351     | X  | 7171256   | missense | C | T | 0.102 | p.L11F    |
| 8181 | <i>MAGEB4</i>   | 2367    | X  | 30260818  | missense | A | G | 0.172 | p.Q189R   |
| 8181 | <i>FAM104B</i>  | 1166703 | X  | 55172521  | missense | G | T | 0.099 | p.T114K   |
| 8181 | <i>FAM104B</i>  | 138362  | X  | 55172686  | missense | C | T | 0.208 | p.S60N    |
| 8181 | <i>FAM104B</i>  | 138362  | X  | 55172689  | missense | G | T | 0.101 | p.A59E    |
| 8181 | <i>NLGN3</i>    | 181303  | X  | 70387614  | missense | T | C | 0.208 | p.V556A   |
| 8181 | <i>DACH2</i>    | 53281   | X  | 85969670  | missense | G | T | 0.173 | p.A351S   |
| 8181 | <i>GLRA4</i>    | 1024452 | X  | 102968516 | missense | T | A | 0.130 | p.I339L   |
| 8181 | <i>SPANXN2</i>  | 1009615 | X  | 142795149 | missense | C | A | 0.054 | p.G177C   |
| 8185 | <i>UBR4</i>     | 20765   | 1  | 19404482  | stopgain | G | T | 0.073 | p.Y5104X  |
| 8185 | <i>MCTP1</i>    | 24717   | 5  | 94248656  | stopgain | G | C | 0.250 | p.S459X   |
| 8185 | <i>PCDHGB2</i>  | 32096   | 5  | 140741230 | stopgain | C | T | 0.148 | p.Q510X   |
| 8185 | <i>PABPC1</i>   | 2568    | 8  | 101724951 | stopgain | T | A | 0.116 | p.K269X   |
| 8185 | <i>CMA1</i>     | 1836    | 14 | 24975387  | stopgain | C | T | 0.126 | p.W149X   |
| 8185 | <i>USP48</i>    | 32236   | 1  | 22050432  | missense | T | C | 0.102 | p.D536G   |
| 8185 | <i>EPHA10</i>   | 173641  | 1  | 38230692  | missense | C | T | 0.217 | p.R16Q    |
| 8185 | <i>ZBTB7B</i>   | 1256455 | 1  | 154987158 | missense | C | G | 0.206 | p.L42V    |
| 8185 | <i>ACTA1</i>    | 1100    | 1  | 229567918 | missense | C | T | 0.130 | p.V211M   |
| 8185 | <i>MYT1L</i>    | 15025   | 2  | 1920982   | missense | G | A | 0.154 | p.P536L   |
| 8185 | <i>DTNB</i>     | 183361  | 2  | 25799783  | missense | C | A | 0.132 | p.C267F   |
| 8185 | <i>PREB</i>     | 13388   | 2  | 27355188  | missense | G | A | 0.220 | p.P279L   |
| 8185 | <i>TTN</i>      | 133437  | 2  | 179408266 | missense | C | T | 0.152 | p.R32145H |
| 8185 | <i>FSIP2</i>    | 173651  | 2  | 186672147 | missense | C | G | 0.138 | p.D6127E  |
| 8185 | <i>UGT1A6</i>   | 1072    | 2  | 234601805 | missense | G | A | 0.134 | p.R52Q    |
| 8185 | <i>IQCA1</i>    | 24726   | 2  | 237253244 | missense | T | C | 0.136 | p.T638A   |
| 8185 | <i>USP19</i>    | 6677    | 3  | 49153065  | missense | G | C | 0.194 | p.P555R   |
| 8185 | <i>PHLDB2</i>   | 145753  | 3  | 111632416 | missense | G | A | 0.122 | p.S556N   |
| 8185 | <i>RBM46</i>    | 144979  | 4  | 155719352 | missense | A | T | 0.061 | p.T181S   |
| 8185 | <i>PCDHB1</i>   | 13340   | 5  | 140431527 | missense | C | G | 0.113 | p.Q158E   |
| 8185 | <i>ZBED8</i>    | 22090   | 5  | 159820951 | missense | A | C | 0.131 | p.F516C   |
| 8185 | <i>BMP6</i>     | 1718    | 6  | 7727493   | missense | C | T | 0.094 | p.P102L   |
| 8185 | <i>FAM8A1</i>   | 16255   | 6  | 17601086  | missense | A | G | 0.077 | p.Q149R   |
| 8185 | <i>SGK1</i>     | 1143676 | 6  | 134583262 | missense | T | A | 0.118 | p.M32L    |
| 8185 | <i>GRM3</i>     | 840     | 7  | 86468673  | missense | T | C | 0.126 | p.C615R   |
| 8185 | <i>TAS2R5</i>   | 18980   | 7  | 141490378 | missense | C | G | 0.076 | p.Q73E    |
| 8185 | <i>PRKACG</i>   | 2732    | 9  | 71628351  | missense | C | T | 0.138 | p.V220M   |
| 8185 | <i>CUBN</i>     | 1081    | 10 | 16958017  | missense | C | T | 0.103 | p.G2338E  |
| 8185 | <i>KIAA1217</i> | 19590   | 10 | 24762598  | missense | C | T | 0.138 | p.R350W   |
| 8185 | <i>TET1</i>     | 30625   | 10 | 70333419  | missense | A | G | 0.138 | p.T442A   |
| 8185 | <i>ZNF503</i>   | 32772   | 10 | 77159075  | missense | G | A | 0.262 | p.A458V   |
| 8185 | <i>CTBP2</i>    | 22802   | 10 | 126686649 | missense | G | C | 0.161 | p.T150R   |
| 8185 | <i>CTBP2</i>    | 22802   | 10 | 126686656 | missense | T | C | 0.152 | p.R148G   |
| 8185 | <i>CTBP2</i>    | 22802   | 10 | 126686659 | missense | G | A | 0.182 | p.R147W   |
| 8185 | <i>OR51B5</i>   | 1005567 | 11 | 5364465   | missense | G | C | 0.127 | p.S97C    |
| 8185 | <i>OR10AG1</i>  | 1005491 | 11 | 55735638  | missense | G | A | 0.173 | p.T101M   |
| 8185 | <i>CTDSP2</i>   | 5730    | 12 | 58217698  | missense | G | T | 0.063 | p.P227T   |
| 8185 | <i>CTDSP2</i>   | 5730    | 12 | 58217770  | missense | G | C | 0.084 | p.L203V   |
| 8185 | <i>CTDSP2</i>   | 5730    | 12 | 58220811  | missense | G | T | 0.070 | p.L108I   |
| 8185 | <i>CTDSP2</i>   | 5730    | 12 | 58220819  | missense | A | G | 0.104 | p.V105A   |
| 8185 | <i>CTDSP2</i>   | 5730    | 12 | 58220831  | missense | C | G | 0.063 | p.R101T   |
| 8185 | <i>CTDSP2</i>   | 5730    | 12 | 58240188  | missense | G | A | 0.140 | p.R11W    |
| 8185 | <i>PABPC3</i>   | 30979   | 13 | 25670691  | missense | G | T | 0.098 | p.V119F   |
| 8185 | <i>PABPC3</i>   | 30979   | 13 | 25670703  | missense | G | T | 0.098 | p.G123C   |
| 8185 | <i>PABPC3</i>   | 30979   | 13 | 25670712  | missense | C | G | 0.085 | p.L126V   |
| 8185 | <i>NBEA</i>     | 15678   | 13 | 36220460  | missense | C | T | 0.132 | p.P2561L  |
| 8185 | <i>CCDC168</i>  | 1146197 | 13 | 103388246 | missense | T | A | 0.143 | p.K4934M  |
| 8185 | <i>EFNB2</i>    | 4093    | 13 | 107187260 | missense | A | G | 0.103 | p.V18A    |
| 8185 | <i>FBN1</i>     | 138     | 15 | 48729575  | missense | C | T | 0.145 | p.R2108H  |
| 8185 | <i>MYLK3</i>    | 182493  | 16 | 46746582  | missense | C | A | 0.066 | p.V698L   |
| 8185 | <i>GNAO1</i>    | 138736  | 16 | 56309857  | missense | A | T | 0.158 | p.D59V    |
| 8185 | <i>TP53</i>     | 1276761 | 17 | 7577097   | missense | C | G | 0.121 | p.D242H   |
| 8185 | <i>LRRC3C</i>   | 1195545 | 17 | 38100199  | missense | C | T | 0.084 | p.P14S    |
| 8185 | <i>CCBE1</i>    | 133459  | 18 | 57136726  | missense | G | A | 0.182 | p.R127W   |
| 8185 | <i>PLIN4</i>    | 1080400 | 19 | 4511861   | missense | A | G | 0.051 | p.L690P   |
| 8185 | <i>MUC16</i>    | 24690   | 19 | 9072268   | missense | G | A | 0.129 | p.P560S   |
| 8185 | <i>COL5A3</i>   | 15719   | 19 | 10112330  | missense | T | C | 0.208 | p.D327G   |
| 8185 | <i>ZSWIM4</i>   | 23072   | 19 | 13919661  | missense | C | T | 0.153 | p.P242S   |

|      |          |         |    |           |          |   |   |       |          |
|------|----------|---------|----|-----------|----------|---|---|-------|----------|
| 8185 | MARK4    | 31417   | 19 | 45781804  | missense | G | C | 0.054 | p.G313R  |
| 8185 | LILRB4   | 1278429 | 19 | 55178163  | missense | A | G | 0.120 | p.N336S  |
| 8185 | LILRB4   | 1278429 | 19 | 55178164  | missense | C | G | 0.122 | p.N336K  |
| 8185 | MZF1     | 198055  | 19 | 59074322  | missense | C | T | 0.162 | p.R441H  |
| 8185 | PTPRT    | 133170  | 20 | 40979297  | missense | T | A | 0.164 | p.K612N  |
| 8185 | TOB2     | 16272   | 22 | 41832436  | missense | A | T | 0.099 | p.F305Y  |
| 8185 | FAM104B  | 138362  | X  | 55172686  | missense | C | T | 0.154 | p.S60N   |
| 8185 | FAM104B  | 138362  | X  | 55172689  | missense | G | T | 0.085 | p.A59E   |
| 8185 | TNMD     | 22144   | X  | 99848988  | missense | G | A | 0.148 | p.G93R   |
| 8185 | GPRASP1  | 14710   | X  | 101912313 | missense | G | A | 0.083 | p.E1158K |
| 8185 | IRS4     | 3604    | X  | 107975824 | missense | C | T | 0.077 | p.D1251N |
| 8185 | AGTR2    | 686     | X  | 115304551 | missense | C | T | 0.157 | p.L340F  |
| 8185 | PGRMC1   | 6667    | X  | 118370610 | missense | G | T | 0.101 | p.G95V   |
| 8192 | ATF7IP   | 181352  | 12 | 14613566  | stopgain | C | T | 0.286 | p.Q774X  |
| 8192 | LPPR4    | 14839   | 1  | 99753615  | missense | G | A | 0.222 | p.R106Q  |
| 8192 | TARS2    | 25150   | 1  | 150471769 | missense | G | C | 0.227 | p.K539N  |
| 8192 | B3GALT2  | 3783    | 1  | 193149636 | missense | T | C | 0.063 | p.I353V  |
| 8192 | NAGK     | 17567   | 2  | 71297886  | missense | A | C | 0.074 | p.K90Q   |
| 8192 | IMMT     | 6839    | 2  | 86371761  | missense | T | C | 0.258 | p.Y636C  |
| 8192 | LMAN2L   | 30805   | 2  | 97403694  | missense | T | C | 0.237 | p.N100D  |
| 8192 | HOXD8    | 19558   | 2  | 176996254 | missense | G | A | 0.161 | p.V79I   |
| 8192 | NFE2L2   | 6164    | 2  | 178097161 | missense | C | T | 0.300 | p.E185K  |
| 8192 | COL5A2   | 393     | 2  | 189923194 | missense | C | G | 0.147 | p.E730D  |
| 8192 | KALRN    | 3947    | 3  | 123813728 | missense | G | A | 0.228 | p.R15H   |
| 8192 | SLC7A14  | 20949   | 3  | 170185163 | missense | G | T | 0.133 | p.L666M  |
| 8192 | KIAA0232 | 14743   | 4  | 6863846   | missense | A | C | 0.079 | p.L579F  |
| 8192 | KIAA0232 | 14743   | 4  | 6864121   | missense | A | G | 0.080 | p.N671S  |
| 8192 | KIAA0232 | 14743   | 4  | 6864126   | missense | A | C | 0.098 | p.N673H  |
| 8192 | KIAA0232 | 14743   | 4  | 6864129   | missense | A | G | 0.102 | p.T674A  |
| 8192 | ANKRD17  | 198889  | 4  | 74123997  | missense | G | A | 0.129 | p.S130F  |
| 8192 | FRAS1    | 25074   | 4  | 79343047  | missense | C | T | 0.306 | p.S1524F |
| 8192 | ANKRD50  | 20337   | 4  | 125592212 | missense | T | G | 0.192 | p.E740D  |
| 8192 | PCDH18   | 19035   | 4  | 138453137 | missense | C | T | 0.217 | p.E36K   |
| 8192 | SREK1    | 139168  | 5  | 65466631  | missense | A | T | 0.302 | p.K331I  |
| 8192 | GPR151   | 194251  | 5  | 145894655 | missense | C | G | 0.200 | p.G341A  |
| 8192 | UBLCP1   | 145049  | 5  | 158697369 | missense | A | C | 0.206 | p.E83A   |
| 8192 | OR11A1   | 13937   | 6  | 29395328  | missense | T | A | 0.174 | p.I31F   |
| 8192 | KIAA1919 | 153369  | 6  | 111587684 | missense | A | G | 0.070 | p.T307A  |
| 8192 | KIAA1919 | 153369  | 6  | 111587691 | missense | C | G | 0.059 | p.S309C  |
| 8192 | KIAA1919 | 153369  | 6  | 111587695 | missense | A | C | 0.076 | p.L310F  |
| 8192 | SEMA3E   | 12431   | 7  | 83032052  | missense | A | G | 0.118 | p.S347P  |
| 8192 | CLDN12   | 12129   | 7  | 90042138  | missense | G | A | 0.068 | p.V50I   |
| 8192 | RBM28    | 18077   | 7  | 127977208 | missense | T | C | 0.250 | p.D197G  |
| 8192 | CSMD1    | 33225   | 8  | 2967743   | missense | T | C | 0.114 | p.H2182R |
| 8192 | CA1      | 1738    | 8  | 86244763  | missense | T | G | 0.200 | p.K157Q  |
| 8192 | RBM12B   | 203390  | 8  | 94748223  | missense | T | A | 0.071 | p.H139L  |
| 8192 | WISP1    | 80838   | 8  | 134239843 | missense | C | T | 0.161 | p.R332C  |
| 8192 | PTPDC1   | 177995  | 9  | 96860265  | missense | T | G | 0.273 | p.L419V  |
| 8192 | FAM170B  | 1164484 | 10 | 50340202  | missense | G | A | 0.133 | p.P103L  |
| 8192 | ANKRD1   | 14391   | 10 | 92675373  | missense | G | A | 0.154 | p.A259V  |
| 8192 | DMBT1    | 17579   | 10 | 124396713 | missense | C | T | 0.143 | p.S2147F |
| 8192 | PCF11    | 15885   | 11 | 82875436  | missense | C | T | 0.229 | p.A232V  |
| 8192 | FZD4     | 12193   | 11 | 86663373  | missense | C | G | 0.118 | p.S142T  |
| 8192 | FZD4     | 12193   | 11 | 86663375  | missense | C | G | 0.114 | p.E141D  |
| 8192 | CTDSP2   | 5730    | 12 | 58217763  | missense | C | T | 0.146 | p.R205H  |
| 8192 | CTDSP2   | 5730    | 12 | 58220819  | missense | A | G | 0.082 | p.V105A  |
| 8192 | DNAH10   | 207437  | 12 | 124387611 | missense | G | A | 0.200 | p.A3138T |
| 8192 | GPR133   | 198827  | 12 | 131590337 | missense | A | T | 0.250 | p.H605L  |
| 8192 | CPNE6    | 6032    | 14 | 24546421  | missense | G | C | 0.233 | p.R508P  |
| 8192 | SRP54    | 3136    | 14 | 35498276  | missense | C | T | 0.138 | p.A478V  |
| 8192 | HEATR4   | 203309  | 14 | 73945333  | missense | C | A | 0.182 | p.G1020V |
| 8192 | RIN3     | 24832   | 14 | 93118397  | missense | C | A | 0.138 | p.Q335K  |
| 8192 | MYO5A    | 1142495 | 15 | 52606035  | missense | C | T | 0.174 | p.R1809Q |
| 8192 | LDHAL6B  | 33195   | 15 | 59500155  | missense | G | A | 0.222 | p.S339N  |
| 8192 | SCAPER   | 20843   | 15 | 76673745  | missense | C | T | 0.250 | p.A981T  |
| 8192 | NETO2    | 18092   | 16 | 47162398  | missense | C | T | 0.111 | p.V107I  |
| 8192 | WDR59    | 30581   | 16 | 74949892  | missense | G | T | 0.214 | p.A367D  |
| 8192 | STAT3    | 213662  | 17 | 40474420  | missense | C | A | 0.167 | p.D661Y  |
| 8192 | HPN      | 182983  | 19 | 35551061  | missense | G | A | 0.095 | p.A148T  |
| 8192 | ZNF235   | 4234    | 19 | 44793338  | missense | G | T | 0.225 | p.Q84K   |
| 8192 | RIN2     | 18993   | 20 | 19870249  | missense | A | T | 0.108 | p.T51S   |
| 8192 | RBM12    | 152838  | 20 | 34243109  | missense | C | T | 0.063 | p.V46I   |
| 8192 | BAGE2    | 182482  | 21 | 11098708  | missense | C | T | 0.089 | p.G4R    |
| 8192 | ZBED4    | 14838   | 22 | 50279349  | missense | G | C | 0.098 | p.G680A  |
| 8195 | SLC30A6  | 17964   | 2  | 32445309  | stopgain | C | T | 0.085 | p.R345X  |
| 8195 | SIN3A    | 15477   | 15 | 75692392  | stopgain | C | A | 0.250 | p.E615X  |
| 8195 | SIN3A    | 15477   | 15 | 75722530  | stopgain | G | A | 0.229 | p.Q63X   |
| 8195 | CNKSR2   | 14927   | X  | 21450853  | stopgain | C | T | 0.229 | p.R118X  |
| 8195 | PLEKHG5  | 198681  | 1  | 6533164   | missense | G | A | 0.154 | p.P366L  |
| 8195 | PPP2R5A  | 6243    | 1  | 212530307 | missense | G | A | 0.111 | p.E332K  |
| 8195 | PPP2R5A  | 6243    | 1  | 212530318 | missense | A | T | 0.096 | p.E335D  |



|      |                   |         |    |           |          |   |   |       |          |
|------|-------------------|---------|----|-----------|----------|---|---|-------|----------|
| 8195 | <i>PPP2R5A</i>    | 6243    | 1  | 212530319 | missense | A | G | 0.094 | p.I336V  |
| 8195 | <i>FMN2</i>       | 20066   | 1  | 240255656 | missense | A | T | 0.203 | p.N83Y   |
| 8195 | <i>PCGF1</i>      | 32673   | 2  | 74732471  | missense | C | T | 0.263 | p.G243S  |
| 8195 | <i>CNTNAP5</i>    | 130773  | 2  | 125555750 | missense | A | C | 0.057 | p.S1023R |
| 8195 | <i>SCRN3</i>      | 24583   | 2  | 175265866 | missense | G | A | 0.281 | p.A164T  |
| 8195 | <i>FSIP2</i>      | 173651  | 2  | 186673660 | missense | G | T | 0.250 | p.V6632F |
| 8195 | <i>CPS1</i>       | 1875    | 2  | 211507213 | missense | A | G | 0.235 | p.S995G  |
| 8195 | <i>CMTM8</i>      | 178868  | 3  | 32398913  | missense | C | T | 0.238 | p.R66W   |
| 8195 | <i>SCN5A</i>      | 198506  | 3  | 38592776  | missense | G | C | 0.148 | p.T1696S |
| 8195 | <i>PDZRN3</i>     | 15009   | 3  | 73433320  | missense | T | G | 0.118 | p.E799D  |
| 8195 | <i>ZNF717</i>     | 1290209 | 3  | 75787351  | missense | C | A | 0.217 | p.G425W  |
| 8195 | <i>MORC1</i>      | 14429   | 3  | 108751597 | missense | C | T | 0.231 | p.C512Y  |
| 8195 | <i>CPNE4</i>      | 153429  | 3  | 131442346 | missense | G | T | 0.235 | p.H120N  |
| 8195 | <i>TMPPRSS11A</i> | 182606  | 4  | 68777128  | missense | C | T | 0.065 | p.D400N  |
| 8195 | <i>UNC5C</i>      | 3728    | 4  | 96091432  | missense | T | C | 0.281 | p.T835A  |
| 8195 | <i>DNAH5</i>      | 1369    | 5  | 13844999  | missense | C | A | 0.227 | p.A1740S |
| 8195 | <i>FABP7</i>      | 1446    | 6  | 123101502 | missense | G | A | 0.241 | p.G47E   |
| 8195 | <i>SNX9</i>       | 16224   | 6  | 158327174 | missense | C | T | 0.111 | p.A212V  |
| 8195 | <i>GRM3</i>       | 840     | 7  | 86468998  | missense | G | T | 0.066 | p.R723L  |
| 8195 | <i>ASZ1</i>       | 130768  | 7  | 117066904 | missense | T | A | 0.271 | p.E64V   |
| 8195 | <i>WWP1</i>       | 7013    | 8  | 87447715  | missense | G | A | 0.174 | p.G546S  |
| 8195 | <i>SLC24A2</i>    | 20344   | 9  | 19521052  | missense | C | G | 0.296 | p.E526Q  |
| 8195 | <i>RRP12</i>      | 15179   | 10 | 99160183  | missense | G | A | 0.089 | p.A83V   |
| 8195 | <i>CTR9</i>       | 14633   | 11 | 10791826  | missense | C | G | 0.286 | p.L727V  |
| 8195 | <i>KIF18A</i>     | 31217   | 11 | 28119340  | missense | C | A | 0.232 | p.S521   |
| 8195 | <i>CBL</i>        | 5188    | 11 | 119170416 | missense | G | C | 0.057 | p.Q882H  |
| 8195 | <i>CTDSP2</i>     | 5730    | 12 | 58217698  | missense | G | T | 0.096 | p.P227T  |
| 8195 | <i>CTDSP2</i>     | 5730    | 12 | 58217770  | missense | G | C | 0.132 | p.L203V  |
| 8195 | <i>ESD</i>        | 1984    | 13 | 47356837  | missense | T | C | 0.086 | p.T116A  |
| 8195 | <i>ESD</i>        | 1984    | 13 | 47356861  | missense | C | T | 0.083 | p.D108N  |
| 8195 | <i>IPO5</i>       | 2271    | 13 | 98670793  | missense | G | A | 0.062 | p.V909I  |
| 8195 | <i>SAMD4A</i>     | 15589   | 14 | 55169062  | missense | G | A | 0.055 | p.G160D  |
| 8195 | <i>BTBD7</i>      | 1289133 | 14 | 93712523  | missense | A | G | 0.227 | p.M744T  |
| 8195 | <i>RNF111</i>     | 17610   | 15 | 59323686  | missense | C | T | 0.172 | p.S222L  |
| 8195 | <i>SMG1</i>       | 15092   | 16 | 18840853  | missense | G | C | 0.258 | p.Q3120E |
| 8195 | <i>NLK</i>        | 16231   | 17 | 26369915  | missense | G | A | 0.125 | p.A6T    |
| 8195 | <i>PIGS</i>       | 33198   | 17 | 26881281  | missense | A | T | 0.095 | p.L542Q  |
| 8195 | <i>KIAA1468</i>   | 20854   | 18 | 59912099  | missense | G | A | 0.303 | p.D575N  |
| 8195 | <i>SERPINB8</i>   | 198833  | 18 | 61652456  | missense | G | A | 0.250 | p.D233N  |
| 8195 | <i>OR7A5</i>      | 17506   | 19 | 14938494  | missense | A | T | 0.265 | p.L187H  |
| 8195 | <i>NLRP5</i>      | 153447  | 19 | 56538759  | missense | C | T | 0.273 | p.P387L  |
| 8195 | <i>KIF16B</i>     | 24704   | 20 | 16360560  | missense | C | G | 0.340 | p.R696T  |
| 8195 | <i>ID1</i>        | 181353  | 20 | 30193624  | missense | C | G | 0.333 | p.S145C  |
| 8195 | <i>CECR2</i>      | 1290047 | 22 | 18018397  | missense | C | G | 0.129 | p.P286A  |
| 8195 | <i>ZBED4</i>      | 14838   | 22 | 50279333  | missense | T | C | 0.106 | p.F675L  |
| 8195 | <i>ZBED4</i>      | 14838   | 22 | 50279349  | missense | G | C | 0.098 | p.G680A  |
| 8195 | <i>DCAF8L2</i>    | 1136533 | X  | 27765263  | missense | T | C | 0.125 | p.L84P   |
| 8195 | <i>CHDC2</i>      | 173695  | X  | 36162684  | missense | C | G | 0.154 | p.L423V  |
| 8195 | <i>FAM104B</i>    | 138362  | X  | 55172686  | missense | C | T | 0.196 | p.S60N   |
| 8195 | <i>FAM104B</i>    | 138362  | X  | 55172689  | missense | G | T | 0.220 | p.A59E   |
| 8195 | <i>MECP2</i>      | 4992    | X  | 153296388 | missense | C | A | 0.093 | p.Q297H  |
| 8203 | <i>MICAL2</i>     | 14632   | 11 | 12247761  | stopgain | C | T | 0.291 | p.Q578X  |
| 8203 | <i>TXNIP</i>      | 6472    | 1  | 145440407 | missense | G | A | 0.273 | p.R238K  |
| 8203 | <i>AAK1</i>       | 14911   | 2  | 69757827  | missense | A | G | 0.242 | p.L223P  |
| 8203 | <i>KLHL23</i>     | 144711  | 2  | 170606208 | missense | G | A | 0.311 | p.R548Q  |
| 8203 | <i>GAD1</i>       | 817     | 2  | 171716363 | missense | G | A | 0.295 | p.E586K  |
| 8203 | <i>TTN</i>        | 133437  | 2  | 179641235 | missense | C | A | 0.058 | p.D1786Y |
| 8203 | <i>COL3A1</i>     | 90      | 2  | 189859520 | missense | C | T | 0.238 | p.P473L  |
| 8203 | <i>ZNF717</i>     | 1290209 | 3  | 75786765  | missense | G | A | 0.091 | p.T620M  |
| 8203 | <i>ZNF717</i>     | 1290209 | 3  | 75786930  | missense | C | A | 0.114 | p.G565V  |
| 8203 | <i>ZNF717</i>     | 1290209 | 3  | 75787269  | missense | G | T | 0.078 | p.T452K  |
| 8203 | <i>ZNF717</i>     | 1290209 | 3  | 75788230  | missense | C | T | 0.134 | p.V132I  |
| 8203 | <i>GABRA4</i>     | 1204266 | 4  | 46973232  | missense | C | G | 0.242 | p.V229L  |
| 8203 | <i>ZNF608</i>     | 20747   | 5  | 124080678 | missense | G | A | 0.330 | p.S2L    |
| 8203 | <i>ADAMTS19</i>   | 133638  | 5  | 128862044 | missense | A | T | 0.238 | p.L321F  |
| 8203 | <i>RBPMS</i>      | 6867    | 8  | 30242615  | missense | A | G | 0.098 | p.N3D    |
| 8203 | <i>RBPMS</i>      | 6867    | 8  | 30242616  | missense | A | G | 0.098 | p.N3S    |
| 8203 | <i>ACTL7B</i>     | 6686    | 9  | 111617804 | missense | G | A | 0.309 | p.T136I  |
| 8203 | <i>ITIH5</i>      | 32817   | 10 | 7605079   | missense | C | A | 0.051 | p.M932I  |
| 8203 | <i>PLCE1</i>      | 16341   | 10 | 95987090  | missense | C | T | 0.275 | p.L613F  |
| 8203 | <i>DYNC2H1</i>    | 1377    | 11 | 103106426 | missense | C | T | 0.328 | p.A3198V |
| 8203 | <i>SORL1</i>      | 3105    | 11 | 121348861 | missense | A | G | 0.314 | p.K146R  |
| 8203 | <i>KCNJ5</i>      | 890     | 11 | 128781800 | missense | G | A | 0.088 | p.R211Q  |
| 8203 | <i>CTDSP2</i>     | 5730    | 12 | 58217396  | missense | G | A | 0.207 | p.R269W  |
| 8203 | <i>CTDSP2</i>     | 5730    | 12 | 58217398  | missense | A | T | 0.200 | p.L268Q  |
| 8203 | <i>CTDSP2</i>     | 5730    | 12 | 58217698  | missense | G | T | 0.135 | p.P227T  |
| 8203 | <i>CTDSP2</i>     | 5730    | 12 | 58217763  | missense | C | T | 0.276 | p.R205H  |
| 8203 | <i>CTDSP2</i>     | 5730    | 12 | 58217770  | missense | G | T | 0.223 | p.L203I  |
| 8203 | <i>CTDSP2</i>     | 5730    | 12 | 58220801  | missense | G | T | 0.100 | p.T111N  |
| 8203 | <i>CTDSP2</i>     | 5730    | 12 | 58220811  | missense | G | T | 0.164 | p.L108I  |
| 8203 | <i>CTDSP2</i>     | 5730    | 12 | 58220831  | missense | C | G | 0.141 | p.R101T  |

|      |                 |         |    |           |          |   |   |       |           |
|------|-----------------|---------|----|-----------|----------|---|---|-------|-----------|
| 8203 | <i>NAV3</i>     | 14903   | 12 | 78582402  | missense | G | T | 0.279 | p.R1967L  |
| 8203 | <i>AGBL1</i>    | 152336  | 15 | 86807937  | missense | A | G | 0.059 | p.Y466C   |
| 8203 | <i>KSR1</i>     | 14238   | 17 | 25930880  | missense | G | A | 0.111 | p.A396T   |
| 8203 | <i>RNF213</i>   | 1256071 | 17 | 78320174  | missense | C | T | 0.271 | p.P2680L  |
| 8203 | <i>DTNA</i>     | 32979   | 18 | 32391989  | missense | G | A | 0.265 | p.R172Q   |
| 8203 | <i>ZNF776</i>   | 173632  | 19 | 58265723  | missense | T | C | 0.131 | p.C409R   |
| 8203 | <i>FAM104B</i>  | 138362  | X  | 55172686  | missense | C | T | 0.051 | p.S60N    |
| 8203 | <i>ELF4</i>     | 1421    | X  | 129215253 | missense | C | T | 0.120 | p.G18R    |
| 8204 | <i>OR52A1</i>   | 12375   | 11 | 5173263   | stopgain | C | A | 0.146 | p.E113X   |
| 8204 | <i>SLC6A5</i>   | 4211    | 11 | 20639423  | stopgain | C | G | 0.225 | p.S418X   |
| 8204 | <i>SOX11</i>    | 3108    | 2  | 5834153   | missense | T | A | 0.171 | p.F434I   |
| 8204 | <i>COL3A1</i>   | 90      | 2  | 189876394 | missense | G | A | 0.128 | p.R1432Q  |
| 8204 | <i>COL3A1</i>   | 90      | 2  | 189876408 | missense | G | A | 0.109 | p.V1437M  |
| 8204 | <i>COL3A1</i>   | 90      | 2  | 189876423 | missense | G | A | 0.064 | p.V1442I  |
| 8204 | <i>COL3A1</i>   | 90      | 2  | 189876477 | missense | G | A | 0.087 | p.V1460I  |
| 8204 | <i>CLK1</i>     | 4071    | 2  | 201718078 | missense | C | T | 0.070 | p.R469K   |
| 8204 | <i>CLK1</i>     | 4071    | 2  | 201718120 | missense | T | C | 0.063 | p.Q455R   |
| 8204 | <i>CNTN6</i>    | 14461   | 3  | 1415314   | missense | C | A | 0.221 | p.Q605K   |
| 8204 | <i>ZNF717</i>   | 1290209 | 3  | 75788230  | missense | C | T | 0.117 | p.V132I   |
| 8204 | <i>ATP6V1A</i>  | 1690    | 3  | 113524247 | missense | G | T | 0.069 | p.A546S   |
| 8204 | <i>MECOM</i>    | 5241    | 3  | 168834191 | missense | C | T | 0.167 | p.S490N   |
| 8204 | <i>IGFBP7</i>   | 1553    | 4  | 57907042  | missense | T | A | 0.094 | p.Y178F   |
| 8204 | <i>IGFBP7</i>   | 1553    | 4  | 57907049  | missense | G | T | 0.074 | p.Q176K   |
| 8204 | <i>LRAT</i>     | 4744    | 4  | 155665827 | missense | G | A | 0.242 | p.A117T   |
| 8204 | <i>PDE4D</i>    | 1197222 | 5  | 58334885  | missense | C | A | 0.148 | p.G17V    |
| 8204 | <i>PCDHAC1</i>  | 31882   | 5  | 140308533 | missense | A | G | 0.205 | p.I686V   |
| 8204 | <i>SPINK9</i>   | 1040433 | 5  | 147718098 | missense | A | G | 0.154 | p.M49V    |
| 8204 | <i>SPARC</i>    | 3118    | 5  | 151051201 | missense | T | C | 0.073 | p.N88S    |
| 8204 | <i>KCNK5</i>    | 3740    | 6  | 39163655  | missense | T | G | 0.116 | p.I99L    |
| 8204 | <i>GPR111</i>   | 153839  | 6  | 47649067  | missense | G | T | 0.204 | p.D190Y   |
| 8204 | <i>CTGF</i>     | 1901    | 6  | 132270628 | missense | T | C | 0.051 | p.M276V   |
| 8204 | <i>NHSL1</i>    | 20464   | 6  | 138745322 | missense | C | T | 0.191 | p.A1573T  |
| 8204 | <i>SYNJ2</i>    | 3898    | 6  | 158484842 | missense | C | T | 0.087 | p.R383W   |
| 8204 | <i>PCLO</i>     | 33026   | 7  | 82451940  | missense | C | T | 0.057 | p.G4888S  |
| 8204 | <i>COL1A2</i>   | 89      | 7  | 94058575  | missense | T | C | 0.085 | p.Y1263H  |
| 8204 | <i>COL1A2</i>   | 89      | 7  | 94058576  | missense | A | G | 0.085 | p.Y1263C  |
| 8204 | <i>KIAA1456</i> | 20844   | 8  | 12878931  | missense | G | A | 0.168 | p.R248H   |
| 8204 | <i>CHMP5</i>    | 16410   | 9  | 33278185  | missense | G | A | 0.073 | p.A191T   |
| 8204 | <i>CEL</i>      | 1807    | 9  | 135945935 | missense | C | G | 0.150 | p.D461E   |
| 8204 | <i>CARS</i>     | 139273  | 11 | 3050290   | missense | G | A | 0.054 | p.R323W   |
| 8204 | <i>OR8K1</i>    | 1002907 | 11 | 56114355  | missense | T | C | 0.163 | p.S281P   |
| 8204 | <i>TRIM29</i>   | 12101   | 11 | 120008241 | missense | C | T | 0.133 | p.G167S   |
| 8204 | <i>DDX23</i>    | 4818    | 12 | 49231416  | missense | C | T | 0.074 | p.R215Q   |
| 8204 | <i>CTDSP2</i>   | 5730    | 12 | 58217698  | missense | G | T | 0.052 | p.P227T   |
| 8204 | <i>CTDSP2</i>   | 5730    | 12 | 58217770  | missense | G | C | 0.085 | p.L203V   |
| 8204 | <i>CTDSP2</i>   | 5730    | 12 | 58220811  | missense | G | T | 0.060 | p.L108I   |
| 8204 | <i>CTDSP2</i>   | 5730    | 12 | 58220831  | missense | C | G | 0.074 | p.R101T   |
| 8204 | <i>CTDSP2</i>   | 5730    | 12 | 58240188  | missense | G | A | 0.203 | p.R111W   |
| 8204 | <i>CTDSP2</i>   | 5730    | 12 | 58240214  | missense | T | G | 0.077 | p.E2A     |
| 8204 | <i>NBEA</i>     | 15678   | 13 | 36241553  | missense | G | T | 0.167 | p.R2815I  |
| 8204 | <i>FGF14</i>    | 175929  | 13 | 102527628 | missense | A | G | 0.173 | p.I76T    |
| 8204 | <i>SLC10A2</i>  | 452     | 13 | 103718361 | missense | G | A | 0.169 | p.P80L    |
| 8204 | <i>MYH6</i>     | 2471    | 14 | 23870064  | missense | A | G | 0.203 | p.Y422H   |
| 8204 | <i>TSSK4</i>    | 174944  | 14 | 24675211  | missense | G | T | 0.233 | p.G28C    |
| 8204 | <i>PLEKHD1</i>  | 1161498 | 14 | 69992721  | missense | C | A | 0.171 | p.Q269K   |
| 8204 | <i>C15orf41</i> | 1290233 | 15 | 36872116  | missense | C | T | 0.057 | p.P19S    |
| 8204 | <i>LDHAL6B</i>  | 33195   | 15 | 59500155  | missense | G | A | 0.131 | p.S339N   |
| 8204 | <i>GP2</i>      | 1502    | 16 | 20335392  | missense | C | T | 0.229 | p.R94H    |
| 8204 | <i>MYO18A</i>   | 203318  | 17 | 27493253  | missense | G | A | 0.106 | p.R236W   |
| 8204 | <i>CDC27</i>    | 1293091 | 17 | 45229228  | missense | A | C | 0.083 | p.N338K   |
| 8204 | <i>ZBTB7C</i>   | 1039360 | 18 | 45556098  | missense | G | A | 0.234 | p.R465C   |
| 8204 | <i>SAFB</i>     | 2967    | 19 | 5654161   | missense | A | G | 0.200 | p.Q539R   |
| 8204 | <i>MUC16</i>    | 24690   | 19 | 9048519   | missense | C | T | 0.130 | p.V11038I |
| 8204 | <i>DNMT1</i>    | 1379    | 19 | 10265118  | missense | T | C | 0.208 | p.T624A   |
| 8204 | <i>AP2A1</i>    | 130787  | 19 | 50308995  | missense | C | T | 0.061 | p.A871V   |
| 8204 | <i>DPRX</i>     | 1012728 | 19 | 54140130  | missense | G | A | 0.177 | p.C155Y   |
| 8204 | <i>LILRA2</i>   | 6866    | 19 | 55086228  | missense | T | A | 0.156 | p.L128Q   |
| 8204 | <i>LILRA2</i>   | 6866    | 19 | 55086245  | missense | A | G | 0.132 | p.T134A   |
| 8204 | <i>LILRA2</i>   | 6866    | 19 | 55086255  | missense | G | A | 0.128 | p.G137E   |
| 8204 | <i>LILRA2</i>   | 6866    | 19 | 55086276  | missense | T | G | 0.122 | p.V144G   |
| 8204 | <i>PANX2</i>    | 52839   | 22 | 50615632  | missense | G | A | 0.228 | p.C164Y   |
| 8204 | <i>CHDC2</i>    | 173695  | X  | 36162684  | missense | C | G | 0.114 | p.L423V   |
| 8204 | <i>FAM104B</i>  | 138362  | X  | 55172686  | missense | C | T | 0.161 | p.S60N    |
| 8204 | <i>ITGB1BP2</i> | 12278   | X  | 70523493  | missense | A | C | 0.067 | p.E162A   |
| 8204 | <i>RGAG4</i>    | 1024455 | X  | 71350826  | missense | C | A | 0.096 | p.A189S   |
| 8204 | <i>RBMXL3</i>   | 1145346 | X  | 114426324 | missense | G | A | 0.142 | p.G774R   |
| 8204 | <i>IL13RA1</i>  | 1560    | X  | 117880954 | missense | C | T | 0.082 | p.P89L    |
| 8206 | <i>EHMT2</i>    | 25256   | 6  | 31855728  | stopgain | G | A | 0.082 | p.R586X   |
| 8206 | <i>TNR</i>      | 3285    | 1  | 175304931 | missense | G | A | 0.074 | p.R1183W  |
| 8206 | <i>IPO9</i>     | 18085   | 1  | 201822217 | missense | C | A | 0.059 | p.L228M   |
| 8206 | <i>PPP2R5A</i>  | 6243    | 1  | 212530318 | missense | A | T | 0.077 | p.E335D   |

|      |                   |         |    |           |          |   |   |       |           |
|------|-------------------|---------|----|-----------|----------|---|---|-------|-----------|
| 8206 | <i>PPP2R5A</i>    | 6243    | 1  | 212530319 | missense | A | G | 0.061 | p.I336V   |
| 8206 | <i>OBSCN</i>      | 52843   | 1  | 228402494 | missense | C | G | 0.200 | p.P508R   |
| 8206 | <i>GNPAT</i>      | 14236   | 1  | 231408078 | missense | C | T | 0.083 | p.R515C   |
| 8206 | <i>GPR137B</i>    | 3272    | 1  | 236341799 | missense | A | G | 0.058 | p.N184D   |
| 8206 | <i>TTN</i>        | 133378  | 2  | 179540696 | missense | C | T | 0.076 | p.E11469K |
| 8206 | <i>CPS1</i>       | 1875    | 2  | 211455575 | missense | T | A | 0.080 | p.L304I   |
| 8206 | <i>MOGAT1</i>     | 58165   | 2  | 223554125 | missense | T | C | 0.113 | p.Y139H   |
| 8206 | <i>GIGYF2</i>     | 15575   | 2  | 233712247 | missense | C | A | 0.130 | p.P1217Q  |
| 8206 | <i>GRM7</i>       | 181874  | 3  | 6903088   | missense | A | G | 0.054 | p.R5G     |
| 8206 | <i>ZNF717</i>     | 1290209 | 3  | 75788091  | missense | T | A | 0.211 | p.K178M   |
| 8206 | <i>ZNF717</i>     | 1290209 | 3  | 75788230  | missense | C | T | 0.121 | p.V132I   |
| 8206 | <i>C3orf30</i>    | 152539  | 3  | 118865407 | missense | A | T | 0.115 | p.N124I   |
| 8206 | <i>SMARCA5</i>    | 3601    | 4  | 144447566 | missense | G | A | 0.071 | p.V252I   |
| 8206 | <i>CDH9</i>       | 16279   | 5  | 26902759  | missense | T | A | 0.122 | p.H360L   |
| 8206 | <i>CDKN2AIPNL</i> | 80656   | 5  | 133747430 | missense | G | A | 0.255 | p.A39V    |
| 8206 | <i>GPR116</i>     | 15234   | 6  | 46851907  | missense | C | T | 0.156 | p.V144I   |
| 8206 | <i>BACH2</i>      | 21813   | 6  | 90718350  | missense | T | C | 0.052 | p.N72D    |
| 8206 | <i>LTV1</i>       | 32860   | 6  | 144181623 | missense | T | A | 0.074 | p.S286T   |
| 8206 | <i>PDE10A</i>     | 1130690 | 6  | 165827038 | missense | T | A | 0.206 | p.N410I   |
| 8206 | <i>MUC17</i>      | 1040105 | 7  | 100678071 | missense | C | T | 0.058 | p.P1125L  |
| 8206 | <i>CHPF2</i>      | 19015   | 7  | 150931272 | missense | G | A | 0.273 | p.A51T    |
| 8206 | <i>XKR6</i>       | 173683  | 8  | 10755995  | missense | C | T | 0.057 | p.D465N   |
| 8206 | <i>BNIP3L</i>     | 4331    | 8  | 26265828  | missense | G | A | 0.058 | p.A183T   |
| 8206 | <i>MAK16</i>      | 32509   | 8  | 33346111  | missense | G | A | 0.051 | p.A47T    |
| 8206 | <i>RBP3</i>       | 2900    | 10 | 48389545  | missense | C | T | 0.052 | p.D445N   |
| 8206 | <i>ZNF503</i>     | 32772   | 10 | 77161167  | missense | G | A | 0.133 | p.A4V     |
| 8206 | <i>OR51Q1</i>     | 1004757 | 11 | 5444323   | missense | A | C | 0.060 | p.N298T   |
| 8206 | <i>NRXN2</i>      | 138732  | 11 | 64453141  | missense | G | A | 0.229 | p.R377W   |
| 8206 | <i>SF3B2</i>      | 6842    | 11 | 65819899  | missense | T | C | 0.156 | p.L15P    |
| 8206 | <i>ITPR2</i>      | 2223    | 12 | 26580925  | missense | G | A | 0.071 | p.P2289L  |
| 8206 | <i>CTDSP2</i>     | 5730    | 12 | 58217698  | missense | G | T | 0.073 | p.P227T   |
| 8206 | <i>CTDSP2</i>     | 5730    | 12 | 58217763  | missense | C | T | 0.185 | p.R205H   |
| 8206 | <i>CTDSP2</i>     | 5730    | 12 | 58217770  | missense | G | C | 0.073 | p.L203V   |
| 8206 | <i>CTDSP2</i>     | 5730    | 12 | 58220801  | missense | G | T | 0.055 | p.T111N   |
| 8206 | <i>CTDSP2</i>     | 5730    | 12 | 58220811  | missense | G | T | 0.074 | p.L108I   |
| 8206 | <i>CTDSP2</i>     | 5730    | 12 | 58220831  | missense | C | G | 0.117 | p.R101T   |
| 8206 | <i>WDR89</i>      | 80666   | 14 | 64066395  | missense | C | T | 0.057 | p.C89Y    |
| 8206 | <i>WDR89</i>      | 80666   | 14 | 64066402  | missense | A | G | 0.057 | p.S87P    |
| 8206 | <i>VPS39</i>      | 15289   | 15 | 42454639  | missense | C | T | 0.061 | p.S750N   |
| 8206 | <i>LDHAL6B</i>    | 33195   | 15 | 59500155  | missense | G | A | 0.079 | p.S339N   |
| 8206 | <i>UBAPIL</i>     | 1163692 | 15 | 65394893  | missense | C | T | 0.065 | p.E84K    |
| 8206 | <i>CDH11</i>      | 1797    | 16 | 65032542  | missense | A | T | 0.088 | p.V149D   |
| 8206 | <i>CDH11</i>      | 1797    | 16 | 65032569  | missense | T | C | 0.064 | p.E140G   |
| 8206 | <i>CDH11</i>      | 1797    | 16 | 65032741  | missense | A | C | 0.092 | p.S83A    |
| 8206 | <i>AANAT</i>      | 1166579 | 17 | 74464883  | missense | G | C | 0.229 | p.G64R    |
| 8206 | <i>C18orf65</i>   | 1272093 | 18 | 74208262  | missense | C | T | 0.175 | p.L36F    |
| 8206 | <i>ZNF700</i>     | 144566  | 19 | 12060844  | missense | A | G | 0.111 | p.K669E   |
| 8206 | <i>TPD52L2</i>    | 199363  | 20 | 62514136  | missense | G | A | 0.077 | p.V147M   |
| 8206 | <i>PISD</i>       | 14338   | 22 | 32017089  | missense | C | T | 0.062 | p.R212Q   |
| 8206 | <i>BEND2</i>      | 153346  | X  | 18195820  | missense | G | A | 0.078 | p.A500V   |
| 8206 | <i>FAM104B</i>    | 138362  | X  | 55172686  | missense | C | T | 0.088 | p.S60N    |
| 8206 | <i>TAF1</i>       | 138923  | X  | 70609439  | missense | C | T | 0.077 | p.A901V   |
| 8206 | <i>HTATSF1</i>    | 14500   | X  | 135593705 | missense | G | A | 0.154 | p.E601K   |
| 8206 | <i>LDOC1</i>      | 12317   | X  | 140270981 | missense | G | A | 0.129 | p.L76F    |
| 8207 | <i>ZNF717</i>     | 1290209 | 3  | 75787467  | stopgain | G | T | 0.112 | p.S386X   |
| 8207 | <i>PLK2</i>       | 6622    | 5  | 57750471  | stopgain | G | T | 0.070 | p.S652X   |
| 8207 | <i>TNNI3K</i>     | 15978   | 1  | 74737334  | missense | A | C | 0.211 | p.Q243P   |
| 8207 | <i>IFI44L</i>     | 6820    | 1  | 79093748  | missense | A | C | 0.129 | p.T50P    |
| 8207 | <i>LYSMD1</i>     | 1136543 | 1  | 151138225 | missense | T | C | 0.247 | p.K12E    |
| 8207 | <i>RC3H1</i>      | 172071  | 1  | 173907924 | missense | G | A | 0.066 | p.P1113S  |
| 8207 | <i>RASAL2</i>     | 170692  | 1  | 178427372 | missense | G | T | 0.185 | p.S982I   |
| 8207 | <i>NLRP3</i>      | 183395  | 1  | 247587452 | missense | C | T | 0.117 | p.A236V   |
| 8207 | <i>ODC1</i>       | 2539    | 2  | 10581765  | missense | C | T | 0.057 | p.D371N   |
| 8207 | <i>AFF3</i>       | 2285    | 2  | 100170827 | missense | G | C | 0.310 | p.L1169V  |
| 8207 | <i>HOXD11</i>     | 21192   | 2  | 176972268 | missense | C | T | 0.268 | p.A62V    |
| 8207 | <i>UNC80</i>      | 182587  | 2  | 210843307 | missense | G | A | 0.170 | p.R2927H  |
| 8207 | <i>OBSL1</i>      | 15311   | 2  | 220416504 | missense | C | G | 0.265 | p.M1810I  |
| 8207 | <i>ZNF717</i>     | 1290209 | 3  | 75788230  | missense | C | T | 0.135 | p.V132I   |
| 8207 | <i>NAALADL2</i>   | 207015  | 3  | 175520828 | missense | G | A | 0.233 | p.R742Q   |
| 8207 | <i>LIMCH1</i>     | 14988   | 4  | 41648659  | missense | A | G | 0.155 | p.T472A   |
| 8207 | <i>AFP</i>        | 1134    | 4  | 74306391  | missense | A | G | 0.152 | p.S115G   |
| 8207 | <i>DSPP</i>       | 14208   | 4  | 88537574  | missense | G | A | 0.088 | p.D1254N  |
| 8207 | <i>CYP2U1</i>     | 183075  | 4  | 108866213 | missense | T | C | 0.136 | p.L193P   |
| 8207 | <i>MYO10</i>      | 12334   | 5  | 16701752  | missense | T | C | 0.146 | p.K918E   |
| 8207 | <i>GPR98</i>      | 32119   | 5  | 89990255  | missense | G | C | 0.202 | p.G2561A  |
| 8207 | <i>CCDC112</i>    | 152549  | 5  | 114611076 | missense | T | C | 0.307 | p.D169G   |
| 8207 | <i>FAM8A1</i>     | 16255   | 6  | 17601035  | missense | A | G | 0.061 | p.H132R   |
| 8207 | <i>FAM8A1</i>     | 16255   | 6  | 17601040  | missense | G | A | 0.054 | p.G134S   |
| 8207 | <i>FAM8A1</i>     | 16255   | 6  | 17601041  | missense | G | T | 0.051 | p.G134V   |
| 8207 | <i>FAM8A1</i>     | 16255   | 6  | 17601044  | missense | T | C | 0.052 | p.L135P   |
| 8207 | <i>FAM8A1</i>     | 16255   | 6  | 17601058  | missense | G | A | 0.055 | p.A140T   |

|      |                  |         |    |           |          |   |   |       |          |
|------|------------------|---------|----|-----------|----------|---|---|-------|----------|
| 8207 | <i>FAM8A1</i>    | 16255   | 6  | 17601086  | missense | A | G | 0.055 | p.Q149R  |
| 8207 | <i>MUC22</i>     | 1198815 | 6  | 30996168  | missense | C | T | 0.136 | p.A987V  |
| 8207 | <i>CCND3</i>     | 1760    | 6  | 41903706  | missense | G | T | 0.134 | p.P284H  |
| 8207 | <i>COL12A1</i>   | 80645   | 6  | 75801047  | missense | A | G | 0.100 | p.L2915S |
| 8207 | <i>ADGB</i>      | 24694   | 6  | 146977930 | missense | A | C | 0.106 | p.E142D  |
| 8207 | <i>ARID1B</i>    | 20732   | 6  | 157100043 | missense | G | C | 0.184 | p.G327A  |
| 8207 | <i>RELN</i>      | 173054  | 7  | 103276809 | missense | A | C | 0.086 | p.F726V  |
| 8207 | <i>RELN</i>      | 173054  | 7  | 103338450 | missense | T | G | 0.061 | p.E331D  |
| 8207 | <i>DOCK4</i>     | 14705   | 7  | 111386456 | missense | T | G | 0.059 | p.E1528D |
| 8207 | <i>PURG</i>      | 1015508 | 8  | 30854119  | missense | A | G | 0.182 | p.V320A  |
| 8207 | <i>CNTLN</i>     | 17738   | 9  | 17273833  | missense | A | T | 0.238 | p.I318F  |
| 8207 | <i>OR13D1</i>    | 1004484 | 9  | 107456802 | missense | G | C | 0.244 | p.E34Q   |
| 8207 | <i>LMX1B</i>     | 2316    | 9  | 129458722 | missense | G | A | 0.185 | p.A394T  |
| 8207 | <i>MCM10</i>     | 182751  | 10 | 13213012  | missense | C | T | 0.055 | p.T33M   |
| 8207 | <i>LIPJ</i>      | 1010939 | 10 | 90351174  | missense | T | C | 0.175 | p.Y17H   |
| 8207 | <i>ROBO3</i>     | 22370   | 11 | 124748620 | missense | C | A | 0.054 | p.A1154D |
| 8207 | <i>CTDSP2</i>    | 5730    | 12 | 58217698  | missense | G | T | 0.122 | p.P227T  |
| 8207 | <i>CTDSP2</i>    | 5730    | 12 | 58217770  | missense | G | C | 0.148 | p.L203V  |
| 8207 | <i>CTDSP2</i>    | 5730    | 12 | 58220811  | missense | G | T | 0.094 | p.L108I  |
| 8207 | <i>CTDSP2</i>    | 5730    | 12 | 58220831  | missense | C | G | 0.108 | p.R101T  |
| 8207 | <i>TBX3</i>      | 16569   | 12 | 115115388 | missense | T | G | 0.156 | p.K313T  |
| 8207 | <i>DACH1</i>     | 80759   | 13 | 72147103  | missense | G | A | 0.194 | p.P392S  |
| 8207 | <i>FGF14</i>     | 175929  | 13 | 102375189 | missense | T | C | 0.187 | p.T251A  |
| 8207 | <i>ADCK1</i>     | 20421   | 14 | 78285388  | missense | T | C | 0.058 | p.F23L   |
| 8207 | <i>HERC2</i>     | 4667    | 15 | 28501295  | missense | C | T | 0.286 | p.V896M  |
| 8207 | <i>TNFRSF12A</i> | 16639   | 16 | 3071797   | missense | G | C | 0.261 | p.E120D  |
| 8207 | <i>NF1</i>       | 1128147 | 17 | 29509580  | missense | G | A | 0.060 | p.R262H  |
| 8207 | <i>PSMB3</i>     | 2795    | 17 | 36912204  | missense | C | T | 0.138 | p.T86I   |
| 8207 | <i>FBXL12</i>    | 17703   | 19 | 9922306   | missense | C | T | 0.176 | p.G83S   |
| 8207 | <i>TPRX1</i>     | 198479  | 19 | 48305528  | missense | T | A | 0.216 | p.N247I  |
| 8207 | <i>TPRX1</i>     | 198479  | 19 | 48305531  | missense | G | A | 0.195 | p.P246L  |
| 8207 | <i>ZSCAN5B</i>   | 1080456 | 19 | 56704307  | missense | T | C | 0.056 | p.N39D   |
| 8207 | <i>CHGB</i>      | 1819    | 20 | 5904133   | missense | T | C | 0.122 | p.V448A  |
| 8207 | <i>TPX2</i>      | 12112   | 20 | 30386234  | missense | G | A | 0.188 | p.R671Q  |
| 8207 | <i>MC3R</i>      | 19888   | 20 | 54824087  | missense | T | C | 0.266 | p.V63A   |
| 8207 | <i>EIF4ENIF1</i> | 19843   | 22 | 31846304  | missense | C | T | 0.224 | p.G519S  |
| 8212 | <i>AASS</i>      | 5763    | 7  | 121756978 | stopgain | C | A | 0.222 | p.E241X  |
| 8212 | <i>FASTK</i>     | 33015   | 7  | 150776013 | stopgain | G | A | 0.147 | p.R201X  |
| 8212 | <i>WDR89</i>     | 80666   | 14 | 64066363  | stopgain | G | A | 0.078 | p.R100X  |
| 8212 | <i>KCTD1</i>     | 198991  | 18 | 24056619  | stopgain | C | A | 0.061 | p.G57X   |
| 8212 | <i>SLC5A7</i>    | 21815   | 2  | 108609473 | missense | C | G | 0.105 | p.T113S  |
| 8212 | <i>ITPR1</i>     | 2222    | 3  | 4702710   | missense | C | G | 0.088 | p.T397S  |
| 8212 | <i>GADL1</i>     | 207359  | 3  | 30880550  | missense | A | G | 0.073 | p.F281S  |
| 8212 | <i>ZNF717</i>    | 1290209 | 3  | 75788230  | missense | C | T | 0.117 | p.V132I  |
| 8212 | <i>COL6A5</i>    | 153264  | 3  | 130110487 | missense | T | G | 0.075 | p.L961R  |
| 8212 | <i>CCNL1</i>     | 20307   | 3  | 156867308 | missense | C | G | 0.125 | p.D367H  |
| 8212 | <i>MASP1</i>     | 1879    | 3  | 186938043 | missense | T | A | 0.146 | p.K639M  |
| 8212 | <i>ARHGAP24</i>  | 31305   | 4  | 86916156  | missense | A | T | 0.135 | p.Q450L  |
| 8212 | <i>MUC22</i>     | 1198815 | 6  | 30996831  | missense | T | C | 0.094 | p.V1208A |
| 8212 | <i>MUC22</i>     | 1198815 | 6  | 30996836  | missense | G | A | 0.097 | p.A1210T |
| 8212 | <i>MUC22</i>     | 1198815 | 6  | 30996837  | missense | C | T | 0.097 | p.A1210V |
| 8212 | <i>MUC22</i>     | 1198815 | 6  | 30996839  | missense | G | A | 0.103 | p.E1211K |
| 8212 | <i>DST</i>       | 1723    | 6  | 56480682  | missense | C | T | 0.054 | p.G2528D |
| 8212 | <i>ZNF804B</i>   | 181646  | 7  | 88964702  | missense | T | G | 0.164 | p.C802W  |
| 8212 | <i>DNAJB9</i>    | 12328   | 7  | 108213520 | missense | G | A | 0.143 | p.G132E  |
| 8212 | <i>MGAM</i>      | 4668    | 7  | 141730463 | missense | C | G | 0.076 | p.S459C  |
| 8212 | <i>KBTD11</i>    | 14867   | 8  | 1950194   | missense | C | A | 0.222 | p.A279E  |
| 8212 | <i>STMN4</i>     | 30795   | 8  | 27098753  | missense | C | A | 0.098 | p.V73F   |
| 8212 | <i>NRG1</i>      | 13964   | 8  | 32621466  | missense | A | C | 0.136 | p.K495T  |
| 8212 | <i>ZFHX4</i>     | 24721   | 8  | 77616655  | missense | A | C | 0.079 | p.D111A  |
| 8212 | <i>PKHD1L1</i>   | 177531  | 8  | 110497348 | missense | C | A | 0.130 | p.L3218M |
| 8212 | <i>ADRB1</i>     | 684     | 10 | 115804898 | missense | G | T | 0.087 | p.C336F  |
| 8212 | <i>ENO4</i>      | 1242699 | 10 | 118616118 | missense | G | T | 0.085 | p.W137L  |
| 8212 | <i>CTBP2</i>     | 22802   | 10 | 126692019 | missense | G | A | 0.128 | p.P34L   |
| 8212 | <i>GRM5</i>      | 1143831 | 11 | 88242028  | missense | G | A | 0.085 | p.T1124M |
| 8212 | <i>FAIM2</i>     | 12306   | 12 | 50283305  | missense | G | T | 0.118 | p.L204I  |
| 8212 | <i>KRT3</i>      | 57088   | 12 | 53189427  | missense | C | G | 0.099 | p.A134P  |
| 8212 | <i>CTDSP2</i>    | 5730    | 12 | 58217698  | missense | G | T | 0.092 | p.P227T  |
| 8212 | <i>CTDSP2</i>    | 5730    | 12 | 58220801  | missense | G | T | 0.054 | p.T111N  |
| 8212 | <i>CTDSP2</i>    | 5730    | 12 | 58220811  | missense | G | T | 0.105 | p.L108I  |
| 8212 | <i>CTDSP2</i>    | 5730    | 12 | 58220831  | missense | C | G | 0.083 | p.R101T  |
| 8212 | <i>GOLGA3</i>    | 5895    | 12 | 133350780 | missense | G | A | 0.073 | p.P1424S |
| 8212 | <i>AKAP6</i>     | 4274    | 14 | 33292392  | missense | G | T | 0.108 | p.L1791F |
| 8212 | <i>WDR89</i>     | 80666   | 14 | 64066352  | missense | T | A | 0.069 | p.R103S  |
| 8212 | <i>WDR89</i>     | 80666   | 14 | 64066367  | missense | A | T | 0.094 | p.D98E   |
| 8212 | <i>WDR89</i>     | 80666   | 14 | 64066395  | missense | C | T | 0.135 | p.C89Y   |
| 8212 | <i>WDR89</i>     | 80666   | 14 | 64066398  | missense | G | C | 0.133 | p.A88G   |
| 8212 | <i>WDR89</i>     | 80666   | 14 | 64066402  | missense | A | G | 0.133 | p.S87P   |
| 8212 | <i>SERPINA11</i> | 1080451 | 14 | 94912938  | missense | T | C | 0.085 | p.K216R  |
| 8212 | <i>UMOD</i>      | 3361    | 16 | 20359982  | missense | G | A | 0.063 | p.A247V  |
| 8212 | <i>ALOXE3</i>    | 21628   | 17 | 8015509   | missense | A | G | 0.092 | p.L229S  |

|      |                 |         |    |           |          |   |   |       |          |
|------|-----------------|---------|----|-----------|----------|---|---|-------|----------|
| 8212 | <i>DNAH9</i>    | 1372    | 17 | 11671879  | missense | A | C | 0.146 | p.K2427T |
| 8212 | <i>TMM44</i>    | 6351    | 19 | 7992149   | missense | C | T | 0.139 | p.D428N  |
| 8212 | <i>ZNF414</i>   | 32370   | 19 | 8576597   | missense | C | T | 0.161 | p.A260T  |
| 8212 | <i>ZNF805</i>   | 1145078 | 19 | 57764976  | missense | G | C | 0.115 | p.E263D  |
| 8213 | <i>WDR89</i>    | 80666   | 14 | 64066363  | stopgain | G | A | 0.058 | p.R100X  |
| 8213 | <i>C17orf75</i> | 22344   | 17 | 30660465  | stopgain | G | A | 0.083 | p.R316X  |
| 8213 | <i>ATP8B3</i>   | 138813  | 19 | 1789001   | stopgain | C | T | 0.167 | p.W988X  |
| 8213 | <i>CASQ1</i>    | 1231    | 1  | 160160548 | missense | G | A | 0.272 | p.A3T    |
| 8213 | <i>LRP1B</i>    | 18557   | 2  | 141092049 | missense | C | A | 0.319 | p.V4066L |
| 8213 | <i>ERBB4</i>    | 5235    | 2  | 212570054 | missense | C | A | 0.213 | p.R396I  |
| 8213 | <i>DOCK10</i>   | 14689   | 2  | 225717680 | missense | T | C | 0.291 | p.K683R  |
| 8213 | <i>2-Sep</i>    | 1282973 | 2  | 242255956 | missense | G | T | 0.269 | p.G25V   |
| 8213 | <i>MAG11</i>    | 15520   | 3  | 65376930  | missense | G | T | 0.173 | p.P768H  |
| 8213 | <i>CIQTNF7</i>  | 31911   | 4  | 15437392  | missense | A | C | 0.264 | p.S9R    |
| 8213 | <i>WDFY3</i>    | 14991   | 4  | 85658399  | missense | T | C | 0.152 | p.D2232G |
| 8213 | <i>WDFY3</i>    | 14991   | 4  | 85708717  | missense | T | G | 0.244 | p.E1273D |
| 8213 | <i>DSPP</i>     | 14208   | 4  | 88537243  | missense | C | A | 0.203 | p.D1143E |
| 8213 | <i>F11</i>      | 128     | 4  | 187206946 | missense | G | A | 0.244 | p.E487K  |
| 8213 | <i>ITGA1</i>    | 181501  | 5  | 52218646  | missense | G | A | 0.281 | p.D778N  |
| 8213 | <i>ERAP1</i>    | 16442   | 5  | 96126318  | missense | T | C | 0.286 | p.E450G  |
| 8213 | <i>PCDHGA1</i>  | 31993   | 5  | 140710805 | missense | G | C | 0.264 | p.G185A  |
| 8213 | <i>PCDHGC5</i>  | 32407   | 5  | 140871416 | missense | G | A | 0.276 | p.R870H  |
| 8213 | <i>JAKMIP2</i>  | 14790   | 5  | 147008336 | missense | G | A | 0.185 | p.T658I  |
| 8213 | <i>TIGD6</i>    | 30953   | 5  | 149375542 | missense | G | T | 0.305 | p.L124M  |
| 8213 | <i>MUC22</i>    | 1198815 | 6  | 30996831  | missense | T | C | 0.152 | p.V1208A |
| 8213 | <i>MUC22</i>    | 1198815 | 6  | 30996836  | missense | G | A | 0.151 | p.A1210T |
| 8213 | <i>MUC22</i>    | 1198815 | 6  | 30996837  | missense | C | T | 0.149 | p.A1210V |
| 8213 | <i>MUC22</i>    | 1198815 | 6  | 30996839  | missense | G | A | 0.165 | p.E1211K |
| 8213 | <i>HLA-DQA2</i> | 20056   | 6  | 32713076  | missense | A | C | 0.070 | p.S75R   |
| 8213 | <i>HLA-DQA2</i> | 20056   | 6  | 32713080  | missense | A | G | 0.072 | p.K76R   |
| 8213 | <i>HLA-DQA2</i> | 20056   | 6  | 32713090  | missense | T | A | 0.059 | p.S79R   |
| 8213 | <i>PIK3CG</i>   | 2649    | 7  | 106509642 | missense | G | A | 0.056 | p.E546K  |
| 8213 | <i>POT1</i>     | 15450   | 7  | 124511069 | missense | C | A | 0.256 | p.D51Y   |
| 8213 | <i>CNBD1</i>    | 173538  | 8  | 87917344  | missense | C | T | 0.222 | p.T65I   |
| 8213 | <i>C9orf72</i>  | 18325   | 9  | 27548356  | missense | C | T | 0.231 | p.E442K  |
| 8213 | <i>RASEF</i>    | 152573  | 9  | 85677517  | missense | G | C | 0.243 | p.A89G   |
| 8213 | <i>PAPPA</i>    | 2581    | 9  | 118997474 | missense | T | C | 0.211 | p.S764P  |
| 8213 | <i>BRD3</i>     | 7371    | 9  | 136918434 | missense | C | A | 0.233 | p.A56S   |
| 8213 | <i>SLC16A9</i>  | 194298  | 10 | 61413610  | missense | C | A | 0.146 | p.A392S  |
| 8213 | <i>PPAPDC1A</i> | 1030059 | 10 | 122348953 | missense | G | A | 0.292 | p.R252K  |
| 8213 | <i>SIRT3</i>    | 12239   | 11 | 233376    | missense | C | T | 0.057 | p.G147D  |
| 8213 | <i>GRAMD1B</i>  | 20716   | 11 | 123480962 | missense | C | G | 0.212 | p.T476S  |
| 8213 | <i>ABCC9</i>    | 20297   | 12 | 22025644  | missense | C | A | 0.073 | p.G705C  |
| 8213 | <i>CCDC91</i>   | 18318   | 12 | 28603103  | missense | C | A | 0.056 | p.L258I  |
| 8213 | <i>CTDSP2</i>   | 5730    | 12 | 58217763  | missense | C | T | 0.244 | p.R205H  |
| 8213 | <i>CTDSP2</i>   | 5730    | 12 | 58217770  | missense | G | C | 0.076 | p.L203V  |
| 8213 | <i>CTDSP2</i>   | 5730    | 12 | 58220819  | missense | A | G | 0.078 | p.V105A  |
| 8213 | <i>CTDSP2</i>   | 5730    | 12 | 58220831  | missense | C | A | 0.087 | p.R101M  |
| 8213 | <i>GZMB</i>     | 4131    | 14 | 25102248  | missense | C | T | 0.236 | p.E26K   |
| 8213 | <i>WDR89</i>    | 80666   | 14 | 64066352  | missense | T | A | 0.052 | p.R103S  |
| 8213 | <i>ADAM20</i>   | 3814    | 14 | 70990018  | missense | G | A | 0.324 | p.P536L  |
| 8213 | <i>IFI27</i>    | 5532    | 14 | 94582140  | missense | C | T | 0.258 | p.H4Y    |
| 8213 | <i>CLMN</i>     | 24734   | 14 | 95670689  | missense | C | T | 0.239 | p.E333K  |
| 8213 | <i>AHNAK2</i>   | 138420  | 14 | 105406702 | missense | G | A | 0.250 | p.P5029L |
| 8213 | <i>MYO5A</i>    | 1142495 | 15 | 52667653  | missense | C | T | 0.257 | p.A809T  |
| 8213 | <i>FAM154B</i>  | 1008226 | 15 | 82564095  | missense | G | C | 0.286 | p.E69Q   |
| 8213 | <i>BNC1</i>     | 1717    | 15 | 83933269  | missense | G | C | 0.257 | p.P245R  |
| 8213 | <i>MESP2</i>    | 1039958 | 15 | 90320144  | missense | C | G | 0.133 | p.Q186E  |
| 8213 | <i>CEMP1</i>    | 1048212 | 16 | 2580867   | missense | G | A | 0.277 | p.H70Y   |
| 8213 | <i>C16orf72</i> | 14117   | 16 | 9186055   | missense | C | T | 0.194 | p.P52S   |
| 8213 | <i>PPP4C</i>    | 2720    | 16 | 30094070  | missense | G | A | 0.250 | p.G69S   |
| 8213 | <i>NFATC3</i>   | 173165  | 16 | 68200849  | missense | C | T | 0.226 | p.R569C  |
| 8213 | <i>ARHGAP27</i> | 199282  | 17 | 43473870  | missense | C | T | 0.107 | p.R378H  |
| 8213 | <i>ABCA8</i>    | 7168    | 17 | 66937024  | missense | A | G | 0.231 | p.L59P   |
| 8213 | <i>CERS4</i>    | 24552   | 19 | 8322764   | missense | C | A | 0.299 | p.A248D  |
| 8213 | <i>DDX3X</i>    | 1193417 | X  | 41205655  | missense | G | A | 0.500 | p.A481T  |
| 8215 | <i>KISS1</i>    | 2256    | 1  | 204159612 | stoploss | T | C | 0.118 | p.X139W  |
| 8215 | <i>VWF</i>      | 552     | 12 | 6058310   | stopgain | G | T | 0.237 | p.C2771X |
| 8215 | <i>WDR89</i>    | 80666   | 14 | 64066363  | stopgain | G | A | 0.102 | p.R100X  |
| 8215 | <i>ASB17</i>    | 80868   | 1  | 76397823  | missense | C | T | 0.060 | p.A52T   |
| 8215 | <i>WDR63</i>    | 145172  | 1  | 85547057  | missense | G | T | 0.083 | p.A82S   |
| 8215 | <i>NT5C1B</i>   | 33253   | 2  | 18767530  | missense | G | T | 0.185 | p.T143N  |
| 8215 | <i>AAK1</i>     | 14911   | 2  | 69708048  | missense | G | A | 0.299 | p.P838L  |
| 8215 | <i>TANC1</i>    | 33394   | 2  | 160087420 | missense | A | G | 0.302 | p.Q1828R |
| 8215 | <i>TTN</i>      | 133379  | 2  | 179614353 | missense | T | A | 0.148 | p.Q4258H |
| 8215 | <i>MYO1B</i>    | 12223   | 2  | 192256834 | missense | G | T | 0.200 | p.R661S  |
| 8215 | <i>ERBB4</i>    | 5235    | 2  | 212989569 | missense | C | T | 0.132 | p.A48T   |
| 8215 | <i>MOGAT1</i>   | 58165   | 2  | 223554125 | missense | T | C | 0.182 | p.Y139H  |
| 8215 | <i>ZNF717</i>   | 1290209 | 3  | 75788230  | missense | C | T | 0.104 | p.V132I  |
| 8215 | <i>1-Mar</i>    | 1166373 | 4  | 164775193 | missense | C | T | 0.157 | p.A31T   |
| 8215 | <i>HLA-DQA2</i> | 20056   | 6  | 32713076  | missense | A | C | 0.090 | p.S75R   |

|      |                 |         |    |           |          |   |   |       |          |
|------|-----------------|---------|----|-----------|----------|---|---|-------|----------|
| 8215 | <i>HLA-DQA2</i> | 20056   | 6  | 32713090  | missense | T | A | 0.079 | p.S79R   |
| 8215 | <i>EYS</i>      | 198283  | 6  | 66044928  | missense | G | T | 0.159 | p.Q571K  |
| 8215 | <i>PLEKHG1</i>  | 1029884 | 6  | 151121977 | missense | G | A | 0.080 | p.R251Q  |
| 8215 | <i>PLEKHA8</i>  | 32639   | 7  | 30101601  | missense | A | G | 0.211 | p.Q396R  |
| 8215 | <i>PCLO</i>     | 33026   | 7  | 82785041  | missense | T | G | 0.126 | p.I306L  |
| 8215 | <i>FZD3</i>     | 145866  | 8  | 28385280  | missense | G | T | 0.126 | p.A335S  |
| 8215 | <i>KAT6A</i>    | 6766    | 8  | 41805346  | missense | C | T | 0.100 | p.D609N  |
| 8215 | <i>EBAG9</i>    | 198120  | 8  | 110563084 | missense | T | G | 0.056 | p.F11V   |
| 8215 | <i>COL13A1</i>  | 80805   | 10 | 71662606  | missense | C | A | 0.258 | p.P295T  |
| 8215 | <i>GLRX3</i>    | 6541    | 10 | 131943522 | missense | C | T | 0.087 | p.A47V   |
| 8215 | <i>OR52N4</i>   | 1005175 | 11 | 5776643   | missense | C | T | 0.217 | p.R225W  |
| 8215 | <i>SOX6</i>     | 33326   | 11 | 16117552  | missense | T | C | 0.067 | p.K364R  |
| 8215 | <i>SOX6</i>     | 33326   | 11 | 16117585  | missense | A | G | 0.151 | p.F353S  |
| 8215 | <i>P2RX3</i>    | 2559    | 11 | 57117368  | missense | G | A | 0.238 | p.R234H  |
| 8215 | <i>KDM2A</i>    | 1256405 | 11 | 67007826  | missense | G | C | 0.216 | p.D50H   |
| 8215 | <i>CAPN5</i>    | 4055    | 11 | 76796018  | missense | A | C | 0.056 | p.D29A   |
| 8215 | <i>CNTN5</i>    | 175566  | 11 | 100211334 | missense | G | T | 0.125 | p.G957V  |
| 8215 | <i>TECTA</i>    | 5422    | 11 | 120996567 | missense | C | A | 0.262 | p.T587N  |
| 8215 | <i>ATN1</i>     | 1940    | 12 | 7045894   | missense | G | C | 0.075 | p.Q488H  |
| 8215 | <i>KRT3</i>     | 57088   | 12 | 53189427  | missense | C | G | 0.111 | p.A134P  |
| 8215 | <i>SP1</i>      | 138473  | 12 | 53776733  | missense | C | G | 0.175 | p.S334R  |
| 8215 | <i>CTDSP2</i>   | 5730    | 12 | 58217698  | missense | G | T | 0.082 | p.P227T  |
| 8215 | <i>CTDSP2</i>   | 5730    | 12 | 58217763  | missense | C | T | 0.229 | p.R205H  |
| 8215 | <i>CTDSP2</i>   | 5730    | 12 | 58220811  | missense | G | T | 0.074 | p.L108I  |
| 8215 | <i>CTDSP2</i>   | 5730    | 12 | 58220819  | missense | A | G | 0.118 | p.V105A  |
| 8215 | <i>LRR1Q1</i>   | 1079910 | 12 | 85450256  | missense | A | G | 0.182 | p.E562G  |
| 8215 | <i>NR1H4</i>    | 1206993 | 12 | 100897169 | missense | G | A | 0.101 | p.V2I    |
| 8215 | <i>HSP90B1</i>  | 3299    | 12 | 104341133 | missense | C | G | 0.122 | p.D769E  |
| 8215 | <i>RIMBP2</i>   | 15347   | 12 | 130926679 | missense | G | T | 0.226 | p.D389E  |
| 8215 | <i>OR4K1</i>    | 1004063 | 14 | 20404535  | missense | T | C | 0.206 | p.L237P  |
| 8215 | <i>RHOJ</i>     | 20663   | 14 | 63749868  | missense | G | T | 0.172 | p.L144F  |
| 8215 | <i>WDR89</i>    | 80666   | 14 | 64066352  | missense | T | A | 0.100 | p.R103S  |
| 8215 | <i>WDR89</i>    | 80666   | 14 | 64066367  | missense | A | T | 0.112 | p.D98E   |
| 8215 | <i>WDR89</i>    | 80666   | 14 | 64066395  | missense | C | T | 0.101 | p.C89Y   |
| 8215 | <i>WDR89</i>    | 80666   | 14 | 64066398  | missense | G | C | 0.107 | p.A88G   |
| 8215 | <i>WDR89</i>    | 80666   | 14 | 64066402  | missense | A | G | 0.111 | p.S87P   |
| 8215 | <i>ASB2</i>     | 16150   | 14 | 94405980  | missense | C | T | 0.070 | p.R364H  |
| 8215 | <i>SLC25A29</i> | 152333  | 14 | 100758733 | missense | C | T | 0.200 | p.A201T  |
| 8215 | <i>HSP90AA1</i> | 5348    | 14 | 102551278 | missense | T | C | 0.241 | p.K363E  |
| 8215 | <i>SLC28A2</i>  | 4212    | 15 | 45561672  | missense | A | G | 0.233 | p.Y502C  |
| 8215 | <i>VPS13C</i>   | 20821   | 15 | 62202489  | missense | G | A | 0.078 | p.P2911S |
| 8215 | <i>BAIAP3</i>   | 3933    | 16 | 1388651   | missense | C | T | 0.176 | p.A69V   |
| 8215 | <i>CRAMP1L</i>  | 20825   | 16 | 1718005   | missense | C | G | 0.224 | p.L1049V |
| 8215 | <i>SNX29</i>    | 32167   | 16 | 12571597  | missense | G | A | 0.227 | p.D687N  |
| 8215 | <i>CDH11</i>    | 1797    | 16 | 65025686  | missense | G | C | 0.086 | p.P266A  |
| 8215 | <i>CDH11</i>    | 1797    | 16 | 65025724  | missense | T | C | 0.091 | p.K253R  |
| 8215 | <i>WDR81</i>    | 152348  | 17 | 1639381   | missense | C | G | 0.204 | p.L741V  |
| 8215 | <i>RAI1</i>     | 30665   | 17 | 17697096  | missense | G | C | 0.109 | p.Q278H  |
| 8215 | <i>NF1</i>      | 1128147 | 17 | 29483089  | missense | A | G | 0.140 | p.K50R   |
| 8215 | <i>SEC14L1</i>  | 3003    | 17 | 75196689  | missense | G | A | 0.167 | p.E315K  |
| 8215 | <i>MYOM1</i>    | 19856   | 18 | 3086135   | missense | C | A | 0.225 | p.K1384N |
| 8215 | <i>TTC28</i>    | 1145418 | 22 | 28394914  | missense | G | A | 0.218 | p.T1578M |
| 8215 | <i>DDX3X</i>    | 1193417 | X  | 41206189  | stopgain | C | T | 0.633 | p.Q549X  |
| 8216 | <i>CCDC171</i>  | 173550  | 9  | 15784629  | stopgain | T | G | 0.341 | p.Y1068X |
| 8216 | <i>DNAH3</i>    | 17539   | 16 | 20975551  | stopgain | C | A | 0.246 | p.E3219X |
| 8216 | <i>PTPRU</i>    | 133178  | 1  | 29618493  | missense | C | T | 0.265 | p.R821W  |
| 8216 | <i>PPP2R5A</i>  | 6243    | 1  | 212502608 | missense | G | A | 0.073 | p.V105I  |
| 8216 | <i>PGBD5</i>    | 1258311 | 1  | 230493029 | missense | C | T | 0.301 | p.D124N  |
| 8216 | <i>DCDC2C</i>   | 1287444 | 2  | 3789631   | missense | G | A | 0.217 | p.V180I  |
| 8216 | <i>SAP130</i>   | 24545   | 2  | 128747352 | missense | C | A | 0.143 | p.M548I  |
| 8216 | <i>SCN9A</i>    | 2977    | 2  | 167162416 | missense | C | A | 0.207 | p.G161V  |
| 8216 | <i>FSIP2</i>    | 173651  | 2  | 186655481 | missense | C | A | 0.063 | p.D1295E |
| 8216 | <i>ZNF717</i>   | 1290209 | 3  | 75788230  | missense | C | T | 0.089 | p.V132I  |
| 8216 | <i>PARP9</i>    | 1146106 | 3  | 122254966 | missense | C | T | 0.266 | p.S710N  |
| 8216 | <i>ZNF518B</i>  | 53042   | 4  | 10446244  | missense | C | T | 0.256 | p.R570K  |
| 8216 | <i>CCSER1</i>   | 207491  | 4  | 91230298  | missense | G | T | 0.115 | p.G288V  |
| 8216 | <i>NPNT</i>     | 1184693 | 4  | 106861733 | missense | C | T | 0.315 | p.R265C  |
| 8216 | <i>ANKRD50</i>  | 20337   | 4  | 125590810 | missense | T | C | 0.328 | p.S1208G |
| 8216 | <i>MTMR12</i>   | 1294344 | 5  | 32248930  | missense | G | A | 0.091 | p.P282S  |
| 8216 | <i>PCDH1</i>    | 32420   | 5  | 141248622 | missense | A | G | 0.280 | p.S139P  |
| 8216 | <i>DDC</i>      | 1242890 | 7  | 50560650  | missense | G | A | 0.250 | p.A333V  |
| 8216 | <i>SSC4D</i>    | 80744   | 7  | 76033683  | missense | C | T | 0.255 | p.G25E   |
| 8216 | <i>CSMD1</i>    | 33225   | 8  | 2876015   | missense | G | T | 0.300 | p.S2671R |
| 8216 | <i>OR13D1</i>   | 1004484 | 9  | 107457091 | missense | C | T | 0.275 | p.A130V  |
| 8216 | <i>NPY4R</i>    | 5972    | 10 | 47087874  | missense | G | A | 0.101 | p.G364E  |
| 8216 | <i>CTBP2</i>    | 22802   | 10 | 126686680 | missense | A | C | 0.182 | p.C140G  |
| 8216 | <i>KRT3</i>     | 57088   | 12 | 53189427  | missense | C | G | 0.222 | p.A134P  |
| 8216 | <i>CTDSP2</i>   | 5730    | 12 | 58217698  | missense | G | T | 0.114 | p.P227T  |
| 8216 | <i>CTDSP2</i>   | 5730    | 12 | 58217763  | missense | C | T | 0.259 | p.R205H  |
| 8216 | <i>CTDSP2</i>   | 5730    | 12 | 58217770  | missense | G | C | 0.110 | p.L203V  |
| 8216 | <i>CTDSP2</i>   | 5730    | 12 | 58220801  | missense | G | T | 0.118 | p.T111N  |

|      |                 |         |    |           |          |   |   |       |          |
|------|-----------------|---------|----|-----------|----------|---|---|-------|----------|
| 8216 | <i>HSP90B1</i>  | 3299    | 12 | 104341190 | missense | A | T | 0.050 | p.E788D  |
| 8216 | <i>ACAD10</i>   | 25247   | 12 | 112186176 | missense | T | G | 0.063 | p.H878Q  |
| 8216 | <i>ACAD10</i>   | 25247   | 12 | 112186201 | missense | G | A | 0.063 | p.V887M  |
| 8216 | <i>PIWIL1</i>   | 4764    | 12 | 130841552 | missense | G | T | 0.207 | p.L498F  |
| 8216 | <i>LTBP2</i>    | 428     | 14 | 75017904  | missense | C | A | 0.294 | p.A517S  |
| 8216 | <i>ATF7IP2</i>  | 24997   | 16 | 10575819  | missense | A | G | 0.093 | p.R588G  |
| 8216 | <i>CDH11</i>    | 1797    | 16 | 65032741  | missense | A | C | 0.069 | p.S83A   |
| 8216 | <i>TTC39C</i>   | 153211  | 18 | 21660861  | missense | T | C | 0.062 | p.M197T  |
| 8216 | <i>SETBP1</i>   | 15559   | 18 | 42532808  | missense | A | G | 0.301 | p.D1168G |
| 8216 | <i>GP6</i>      | 1083899 | 19 | 55526103  | missense | G | A | 0.076 | p.P404S  |
| 8218 | <i>CCDC30</i>   | 1080850 | 1  | 43108234  | stopgain | C | T | 0.143 | p.Q577X  |
| 8218 | <i>WDR89</i>    | 80666   | 14 | 64066363  | stopgain | G | A | 0.088 | p.R100X  |
| 8218 | <i>BAI2</i>     | 1294336 | 1  | 32207068  | missense | C | T | 0.131 | p.R567H  |
| 8218 | <i>CELSR2</i>   | 1408    | 1  | 109811330 | missense | C | T | 0.180 | p.A2149V |
| 8218 | <i>KIRREL</i>   | 18240   | 1  | 158045975 | missense | G | C | 0.195 | p.C42S   |
| 8218 | <i>COLGALT2</i> | 15101   | 1  | 183942836 | missense | G | T | 0.078 | p.L181M  |
| 8218 | <i>PLXNA2</i>   | 25179   | 1  | 208206803 | missense | G | A | 0.081 | p.P1639L |
| 8218 | <i>PLD5</i>     | 152666  | 1  | 242687422 | missense | C | T | 0.157 | p.V53I   |
| 8218 | <i>ATAD2B</i>   | 17552   | 2  | 23977054  | missense | C | G | 0.176 | p.V1444L |
| 8218 | <i>MAPRE3</i>   | 12326   | 2  | 27246239  | missense | G | A | 0.056 | p.G54D   |
| 8218 | <i>PRR30</i>    | 178553  | 2  | 27360132  | missense | G | T | 0.199 | p.Q356K  |
| 8218 | <i>MEIS1</i>    | 2398    | 2  | 66670065  | missense | G | C | 0.186 | p.R172P  |
| 8218 | <i>DPP10</i>    | 20868   | 2  | 116599812 | missense | T | C | 0.130 | p.V711A  |
| 8218 | <i>FSIP2</i>    | 173651  | 2  | 186668723 | missense | G | T | 0.212 | p.S4986I |
| 8218 | <i>STK36</i>    | 15690   | 2  | 219544724 | missense | C | A | 0.143 | p.L353I  |
| 8218 | <i>MOGAT1</i>   | 58165   | 2  | 223554125 | missense | T | C | 0.121 | p.Y139H  |
| 8218 | <i>FLNB</i>     | 1457    | 3  | 58134543  | missense | G | A | 0.063 | p.E2050K |
| 8218 | <i>ZNF717</i>   | 1290209 | 3  | 75788230  | missense | C | T | 0.072 | p.V132I  |
| 8218 | <i>MYLK</i>     | 53028   | 3  | 123376048 | missense | G | A | 0.131 | p.R1405C |
| 8218 | <i>PRSSI2</i>   | 3619    | 4  | 119259392 | missense | C | G | 0.120 | p.V194L  |
| 8218 | <i>CAMK4</i>    | 1744    | 5  | 110819845 | missense | A | T | 0.167 | p.D368V  |
| 8218 | <i>PCDH43</i>   | 31497   | 5  | 140181269 | missense | G | A | 0.108 | p.G163R  |
| 8218 | <i>CPEB4</i>    | 30627   | 5  | 173316986 | missense | C | A | 0.068 | p.Q84K   |
| 8218 | <i>HNRNPAB</i>  | 31266   | 5  | 177637589 | missense | C | T | 0.134 | p.R322C  |
| 8218 | <i>GFPT2</i>    | 5110    | 5  | 179729433 | missense | C | T | 0.068 | p.R665Q  |
| 8218 | <i>FAM8A1</i>   | 16255   | 6  | 17601035  | missense | A | G | 0.063 | p.H132R  |
| 8218 | <i>FAM8A1</i>   | 16255   | 6  | 17601040  | missense | G | A | 0.056 | p.G134S  |
| 8218 | <i>FAM8A1</i>   | 16255   | 6  | 17601041  | missense | G | T | 0.056 | p.G134V  |
| 8218 | <i>FAM8A1</i>   | 16255   | 6  | 17601044  | missense | T | C | 0.058 | p.L135P  |
| 8218 | <i>FAM8A1</i>   | 16255   | 6  | 17601058  | missense | G | A | 0.060 | p.A140T  |
| 8218 | <i>FAM8A1</i>   | 16255   | 6  | 17601086  | missense | A | G | 0.066 | p.Q149R  |
| 8218 | <i>HLA-DRB1</i> | 2124    | 6  | 32551942  | missense | T | C | 0.172 | p.D105G  |
| 8218 | <i>SLC22A7</i>  | 153320  | 6  | 43266424  | missense | A | G | 0.097 | p.T110A  |
| 8218 | <i>AK9</i>      | 1145128 | 6  | 109940409 | missense | G | A | 0.098 | p.R429C  |
| 8218 | <i>NPM2</i>     | 182795  | 8  | 21882966  | missense | G | C | 0.211 | p.E26D   |
| 8218 | <i>BAI1</i>     | 1702    | 8  | 143623718 | missense | A | C | 0.053 | p.T1375P |
| 8218 | <i>APBA1</i>    | 1163    | 9  | 72131099  | missense | C | T | 0.125 | p.R343H  |
| 8218 | <i>NTRK2</i>    | 6180    | 9  | 87475984  | missense | A | C | 0.192 | p.K476Q  |
| 8218 | <i>ABCA1</i>    | 5502    | 9  | 107583695 | missense | T | C | 0.122 | p.N974S  |
| 8218 | <i>SKIDA1</i>   | 207371  | 10 | 21804506  | missense | T | G | 0.128 | p.N749T  |
| 8218 | <i>SORCS1</i>   | 52918   | 10 | 108437074 | missense | A | T | 0.260 | p.L610H  |
| 8218 | <i>TACC2</i>    | 206862  | 10 | 123845410 | missense | C | A | 0.156 | p.T1132N |
| 8218 | <i>ADAMTS15</i> | 139055  | 11 | 130341273 | missense | G | T | 0.094 | p.K691N  |
| 8218 | <i>KLRC1</i>    | 213658  | 12 | 10603136  | missense | C | A | 0.143 | p.G77V   |
| 8218 | <i>DUSP16</i>   | 30640   | 12 | 12630494  | missense | T | G | 0.162 | p.E424A  |
| 8218 | <i>KRT3</i>     | 57088   | 12 | 53189427  | missense | C | G | 0.088 | p.A134P  |
| 8218 | <i>PDE1B</i>    | 1288769 | 12 | 54967153  | missense | T | C | 0.170 | p.I147T  |
| 8218 | <i>CTDSP2</i>   | 5730    | 12 | 58217763  | missense | C | T | 0.136 | p.R205H  |
| 8218 | <i>CTDSP2</i>   | 5730    | 12 | 58217770  | missense | G | C | 0.079 | p.L203V  |
| 8218 | <i>CTDSP2</i>   | 5730    | 12 | 58220801  | missense | G | T | 0.078 | p.T111N  |
| 8218 | <i>CTDSP2</i>   | 5730    | 12 | 58220811  | missense | G | T | 0.053 | p.L108I  |
| 8218 | <i>CTDSP2</i>   | 5730    | 12 | 58240188  | missense | G | A | 0.111 | p.R11W   |
| 8218 | <i>PTPRQ</i>    | 1145026 | 12 | 80943510  | missense | A | G | 0.121 | p.T1256A |
| 8218 | <i>MPHOSPH8</i> | 17520   | 13 | 20221166  | missense | T | G | 0.192 | p.M318R  |
| 8218 | <i>N4BP2L2</i>  | 33111   | 13 | 33016577  | missense | T | G | 0.131 | p.Q699H  |
| 8218 | <i>WDR89</i>    | 80666   | 14 | 64066352  | missense | T | A | 0.090 | p.R103S  |
| 8218 | <i>WDR89</i>    | 80666   | 14 | 64066367  | missense | A | T | 0.085 | p.D98E   |
| 8218 | <i>WDR89</i>    | 80666   | 14 | 64066395  | missense | C | T | 0.087 | p.C89Y   |
| 8218 | <i>WDR89</i>    | 80666   | 14 | 64066398  | missense | G | C | 0.087 | p.A88G   |
| 8218 | <i>WDR89</i>    | 80666   | 14 | 64066402  | missense | A | G | 0.085 | p.S87P   |
| 8218 | <i>YLFM1</i>    | 19589   | 14 | 75264567  | missense | C | T | 0.128 | p.A856V  |
| 8218 | <i>ATXN3</i>    | 30660   | 14 | 92537397  | missense | T | C | 0.122 | p.T130A  |
| 8218 | <i>DLK1</i>     | 3836    | 14 | 101195368 | missense | G | C | 0.143 | p.C76S   |
| 8218 | <i>RTL1</i>     | 1134888 | 14 | 101348485 | missense | C | T | 0.169 | p.V881I  |
| 8218 | <i>TRPM1</i>    | 2420    | 15 | 31362323  | missense | A | T | 0.167 | p.W64R   |
| 8218 | <i>MYH11</i>    | 22844   | 16 | 15835617  | missense | C | G | 0.169 | p.Q891H  |
| 8218 | <i>UMOD</i>     | 3361    | 16 | 20355416  | missense | T | G | 0.242 | p.I454L  |
| 8218 | <i>ZFH3</i>     | 6885    | 16 | 72828452  | missense | T | C | 0.204 | p.H2710R |
| 8218 | <i>WDR81</i>    | 152348  | 17 | 1637462   | missense | C | T | 0.114 | p.H660Y  |
| 8218 | <i>KRT9</i>     | 226     | 17 | 39723842  | missense | T | C | 0.099 | p.S519G  |
| 8218 | <i>CDC27</i>    | 1293091 | 17 | 45229234  | missense | A | C | 0.190 | p.S336R  |

|      |                 |         |    |           |          |   |   |       |          |
|------|-----------------|---------|----|-----------|----------|---|---|-------|----------|
| 8218 | <i>SCN4A</i>    | 334     | 17 | 62020395  | missense | A | G | 0.170 | p.M1360T |
| 8218 | <i>PTPRM</i>    | 2845    | 18 | 7906519   | missense | T | C | 0.202 | p.I162T  |
| 8218 | <i>DSC2</i>     | 24422   | 18 | 28649110  | missense | G | C | 0.128 | p.A753G  |
| 8218 | <i>ST8SLA3</i>  | 15879   | 18 | 55027376  | missense | T | A | 0.099 | p.H337Q  |
| 8218 | <i>JSRP1</i>    | 144616  | 19 | 2252561   | missense | T | C | 0.218 | p.R255G  |
| 8218 | <i>PPFLA3</i>   | 3660    | 19 | 49639990  | missense | C | T | 0.138 | p.R559W  |
| 8218 | <i>CDH22</i>    | 21248   | 20 | 44828185  | missense | G | A | 0.184 | p.R434C  |
| 8218 | <i>KIAA1671</i> | 1145206 | 22 | 25437455  | missense | C | T | 0.098 | p.P1453L |
| 8218 | <i>GYG2</i>     | 3918    | X  | 2761334   | missense | A | G | 0.211 | p.R61G   |
| 8218 | <i>CDKL5</i>    | 3159    | X  | 18627604  | missense | C | T | 0.194 | p.P689L  |
| 8218 | <i>CACNA1F</i>  | 5183    | X  | 49087000  | missense | C | T | 0.151 | p.G198E  |
| 8218 | <i>FAM104B</i>  | 1166703 | X  | 55172521  | missense | G | T | 0.087 | p.T114K  |
| 8218 | <i>FAM104B</i>  | 138362  | X  | 55172686  | missense | C | T | 0.140 | p.S60N   |
| 8218 | <i>FAM104B</i>  | 138362  | X  | 55172689  | missense | G | T | 0.098 | p.A59E   |
| 8218 | <i>RPS6KA6</i>  | 14496   | X  | 83319320  | missense | G | A | 0.143 | p.R735W  |
| 8218 | <i>BEX5</i>     | 1159560 | X  | 101409105 | missense | C | A | 0.167 | p.G45C   |
| 8218 | <i>SLITRK4</i>  | 173078  | X  | 142718677 | missense | G | A | 0.171 | p.S83L   |
| 8222 | <i>PLCH1</i>    | 14996   | 3  | 155200106 | stopgain | C | A | 0.178 | p.G1245X |
| 8222 | <i>GNAT3</i>    | 1102386 | 7  | 80141196  | stopgain | G | T | 0.066 | p.S16X   |
| 8222 | <i>PCLO</i>     | 33026   | 7  | 82784338  | stopgain | G | T | 0.165 | p.S540X  |
| 8222 | <i>NCOR1</i>    | 6311    | 17 | 15984008  | stopgain | G | A | 0.108 | p.Q1071X |
| 8222 | <i>TJP3</i>     | 1267561 | 19 | 3728698   | stopgain | G | T | 0.152 | p.E58X   |
| 8222 | <i>UBXN11</i>   | 183008  | 1  | 26608849  | missense | T | C | 0.266 | p.S502G  |
| 8222 | <i>ARID1A</i>   | 139135  | 1  | 27087363  | missense | T | C | 0.056 | p.I646T  |
| 8222 | <i>LCE2D</i>    | 178430  | 1  | 152636820 | missense | T | C | 0.212 | p.L80P   |
| 8222 | <i>ADAMTS9</i>  | 182920  | 3  | 64587644  | missense | C | G | 0.218 | p.Q1331H |
| 8222 | <i>ZNF717</i>   | 1290209 | 3  | 75787351  | missense | C | A | 0.082 | p.G425W  |
| 8222 | <i>CBLB</i>     | 170662  | 3  | 105586351 | missense | C | T | 0.170 | p.G24D   |
| 8222 | <i>KIAA0226</i> | 14687   | 3  | 197401980 | missense | G | C | 0.054 | p.A898G  |
| 8222 | <i>PI4K2B</i>   | 18323   | 4  | 25265395  | missense | A | T | 0.143 | p.E334D  |
| 8222 | <i>FREM3</i>    | 1168235 | 4  | 144620631 | missense | G | A | 0.190 | p.R400C  |
| 8222 | <i>NADK2</i>    | 1287341 | 5  | 36208759  | missense | A | T | 0.051 | p.N135K  |
| 8222 | <i>MAP3K1</i>   | 5921    | 5  | 56177851  | missense | A | T | 0.109 | p.T942S  |
| 8222 | <i>SH3TC2</i>   | 24577   | 5  | 148389854 | missense | A | T | 0.130 | p.H1102Q |
| 8222 | <i>FAT2</i>     | 1447    | 5  | 150900870 | missense | G | A | 0.145 | p.R3762W |
| 8222 | <i>KCNQ5</i>    | 19842   | 6  | 73904473  | missense | A | G | 0.185 | p.Q731R  |
| 8222 | <i>DMRT3</i>    | 21240   | 9  | 990110    | missense | C | G | 0.233 | p.T175S  |
| 8222 | <i>SLC24A2</i>  | 20344   | 9  | 19785978  | missense | C | T | 0.149 | p.R296H  |
| 8222 | <i>FBP2</i>     | 3837    | 9  | 97329590  | missense | C | T | 0.068 | p.A223T  |
| 8222 | <i>SVIL</i>     | 21738   | 10 | 29822202  | missense | C | A | 0.119 | p.R365L  |
| 8222 | <i>ANK3</i>     | 20987   | 10 | 61828941  | missense | C | A | 0.154 | p.A3900S |
| 8222 | <i>CTBP2</i>    | 22802   | 10 | 126686649 | missense | G | C | 0.093 | p.T150R  |
| 8222 | <i>CTBP2</i>    | 22802   | 10 | 126686656 | missense | T | C | 0.086 | p.R148G  |
| 8222 | <i>CTBP2</i>    | 22802   | 10 | 126686659 | missense | G | A | 0.083 | p.R147W  |
| 8222 | <i>OR52E4</i>   | 1005165 | 11 | 5905718   | missense | G | C | 0.180 | p.A66P   |
| 8222 | <i>TRPT1</i>    | 31472   | 11 | 63991428  | missense | A | G | 0.168 | p.S228P  |
| 8222 | <i>DCP1B</i>    | 152640  | 12 | 2062353   | missense | G | C | 0.052 | p.H251Q  |
| 8222 | <i>OVCHI</i>    | 183378  | 12 | 29631779  | missense | C | A | 0.058 | p.G353V  |
| 8222 | <i>CTDSP2</i>   | 5730    | 12 | 58217698  | missense | G | T | 0.077 | p.P227T  |
| 8222 | <i>CTDSP2</i>   | 5730    | 12 | 58217763  | missense | C | T | 0.228 | p.R205H  |
| 8222 | <i>CTDSP2</i>   | 5730    | 12 | 58217770  | missense | G | C | 0.076 | p.L203V  |
| 8222 | <i>CTDSP2</i>   | 5730    | 12 | 58220801  | missense | G | T | 0.110 | p.T111N  |
| 8222 | <i>CTDSP2</i>   | 5730    | 12 | 58220811  | missense | G | T | 0.086 | p.L108I  |
| 8222 | <i>CTDSP2</i>   | 5730    | 12 | 58220831  | missense | C | A | 0.078 | p.R101M  |
| 8222 | <i>CTDSP2</i>   | 5730    | 12 | 58240188  | missense | G | A | 0.072 | p.R11W   |
| 8222 | <i>PABPC3</i>   | 30979   | 13 | 25670691  | missense | G | T | 0.055 | p.V119F  |
| 8222 | <i>PABPC3</i>   | 30979   | 13 | 25670703  | missense | G | T | 0.053 | p.G123C  |
| 8222 | <i>PABPC3</i>   | 30979   | 13 | 25670712  | missense | C | G | 0.050 | p.L126V  |
| 8222 | <i>FAM155A</i>  | 1080396 | 13 | 108518601 | missense | G | A | 0.118 | p.P115L  |
| 8222 | <i>FAM174B</i>  | 207446  | 15 | 93198688  | missense | A | C | 0.105 | p.S68A   |
| 8222 | <i>APOBR</i>    | 18690   | 16 | 28507445  | missense | G | C | 0.157 | p.E361D  |
| 8222 | <i>APOBR</i>    | 18690   | 16 | 28507452  | missense | G | T | 0.119 | p.G364W  |
| 8222 | <i>APOBR</i>    | 18690   | 16 | 28507458  | missense | G | A | 0.057 | p.A366T  |
| 8222 | <i>BCAR1</i>    | 14567   | 16 | 75269671  | missense | G | A | 0.146 | p.P228S  |
| 8222 | <i>FBXO39</i>   | 153230  | 17 | 6683372   | missense | C | G | 0.121 | p.T62S   |
| 8222 | <i>ANKLE1</i>   | 1278444 | 19 | 17397499  | missense | G | T | 0.178 | p.C644F  |
| 8222 | <i>SUN5</i>     | 80675   | 20 | 31572942  | missense | A | G | 0.166 | p.F316S  |
| 8222 | <i>DDX3X</i>    | 1193417 | X  | 41204575  | stopgain | C | T | 0.253 | p.Q374X  |
| 8223 | <i>SP4</i>      | 3112    | 7  | 21469033  | stopgain | C | T | 0.204 | p.Q84X   |
| 8223 | <i>WDR89</i>    | 80666   | 14 | 64066363  | stopgain | G | A | 0.074 | p.R100X  |
| 8223 | <i>CHST9</i>    | 31422   | 18 | 24496522  | stopgain | C | A | 0.230 | p.G345X  |
| 8223 | <i>EPG5</i>     | 20964   | 18 | 43532369  | stopgain | G | A | 0.264 | p.R417X  |
| 8223 | <i>CHEK2</i>    | 145862  | 22 | 29121334  | stopgain | C | T | 0.245 | p.W157X  |
| 8223 | <i>SRRM1</i>    | 5839    | 1  | 24995954  | missense | T | A | 0.293 | p.S694T  |
| 8223 | <i>CDCP2</i>    | 201546  | 1  | 54605318  | missense | T | G | 0.200 | p.M409L  |
| 8223 | <i>POGZ</i>     | 207171  | 1  | 151378326 | missense | T | C | 0.181 | p.E1062G |
| 8223 | <i>INTS3</i>    | 23015   | 1  | 153713205 | missense | G | C | 0.255 | p.A77P   |
| 8223 | <i>MARK1</i>    | 18650   | 1  | 220835416 | missense | T | C | 0.220 | p.S766P  |
| 8223 | <i>PXDN</i>     | 12293   | 2  | 1670184   | missense | C | T | 0.130 | p.A365T  |
| 8223 | <i>PREB</i>     | 13388   | 2  | 27356499  | missense | C | T | 0.185 | p.A76T   |
| 8223 | <i>VWA3B</i>    | 144992  | 2  | 98709683  | missense | A | G | 0.184 | p.H43R   |



|      |                               |         |    |           |          |   |   |       |           |
|------|-------------------------------|---------|----|-----------|----------|---|---|-------|-----------|
| 8223 | <i>UXS1</i>                   | 25076   | 2  | 106742130 | missense | C | T | 0.054 | p.A190T   |
| 8223 | <i>WDR33</i>                  | 18383   | 2  | 128477291 | missense | G | A | 0.125 | p.P770S   |
| 8223 | <i>CCNT2</i>                  | 58241   | 2  | 135694492 | missense | C | A | 0.254 | p.H108N   |
| 8223 | <i>LRP2</i>                   | 4525    | 2  | 170177287 | missense | C | G | 0.130 | p.A63P    |
| 8223 | <i>MYO3B</i>                  | 138995  | 2  | 171259408 | missense | A | G | 0.208 | p.E727G   |
| 8223 | <i>TTN</i>                    | 133437  | 2  | 179460528 | missense | C | A | 0.256 | p.G19185C |
| 8223 | <i>MOGAT1</i>                 | 58165   | 2  | 223554125 | missense | T | C | 0.159 | p.Y139H   |
| 8223 | <i>UGT1A1</i>                 | 463     | 2  | 234669630 | missense | C | A | 0.167 | p.L233I   |
| 8223 | <i>MAPK10</i>                 | 138982  | 4  | 87023076  | missense | G | A | 0.233 | p.H179Y   |
| 8223 | <i>NEK1</i>                   | 12224   | 4  | 170322917 | missense | C | T | 0.198 | p.E1157K  |
| 8223 | <i>SHROOM1</i>                | 133456  | 5  | 132159415 | missense | C | T | 0.153 | p.R618Q   |
| 8223 | <i>SPINK5</i>                 | 6846    | 5  | 147480950 | missense | A | C | 0.238 | p.E418A   |
| 8223 | <i>FAM8A1</i>                 | 16255   | 6  | 17601035  | missense | A | G | 0.075 | p.H132R   |
| 8223 | <i>FAM8A1</i>                 | 16255   | 6  | 17601040  | missense | G | A | 0.073 | p.G134S   |
| 8223 | <i>FAM8A1</i>                 | 16255   | 6  | 17601041  | missense | G | T | 0.077 | p.G134V   |
| 8223 | <i>FAM8A1</i>                 | 16255   | 6  | 17601044  | missense | T | C | 0.077 | p.L135P   |
| 8223 | <i>FAM8A1</i>                 | 16255   | 6  | 17601058  | missense | G | A | 0.073 | p.A140T   |
| 8223 | <i>FAM8A1</i>                 | 16255   | 6  | 17601086  | missense | A | G | 0.066 | p.Q149R   |
| 8223 | <i>PHF3</i>                   | 15153   | 6  | 64395368  | missense | A | C | 0.157 | p.D494A   |
| 8223 | <i>EIF2AK1</i>                | 14413   | 7  | 6080713   | missense | T | C | 0.055 | p.N310S   |
| 8223 | <i>ABCA13</i>                 | 152701  | 7  | 48494696  | missense | G | A | 0.156 | p.A4210T  |
| 8223 | <i>CD36</i>                   | 1289911 | 7  | 80301327  | missense | G | A | 0.145 | p.E366K   |
| 8223 | <i>PCLO</i>                   | 33026   | 7  | 82581488  | missense | T | A | 0.167 | p.E2927D  |
| 8223 | <i>RP1L1</i>                  | 178857  | 8  | 10467580  | missense | T | A | 0.054 | p.E1343V  |
| 8223 | <i>RXR<math>\alpha</math></i> | 2957    | 9  | 137293550 | missense | A | T | 0.146 | p.H34L    |
| 8223 | <i>FFAR4</i>                  | 181745  | 10 | 95347335  | missense | A | C | 0.229 | p.K368T   |
| 8223 | <i>ZNF143</i>                 | 3442    | 11 | 9530285   | missense | G | C | 0.128 | p.G423R   |
| 8223 | <i>USH1C</i>                  | 153676  | 11 | 17530985  | missense | A | G | 0.176 | p.V644A   |
| 8223 | <i>DYNC2H1</i>                | 1377    | 11 | 103152909 | missense | A | G | 0.196 | p.E3595G  |
| 8223 | <i>VWF</i>                    | 552     | 12 | 6125377   | missense | A | G | 0.194 | p.V1778A  |
| 8223 | <i>ACRBP</i>                  | 32489   | 12 | 6749357   | missense | C | A | 0.197 | p.D432Y   |
| 8223 | <i>ADAMTS20</i>               | 25003   | 12 | 43826430  | missense | T | C | 0.216 | p.R969G   |
| 8223 | <i>HDAC7</i>                  | 15401   | 12 | 48189070  | missense | C | T | 0.241 | p.R394Q   |
| 8223 | <i>KMT2D</i>                  | 3482    | 12 | 49445374  | missense | T | C | 0.168 | p.T698A   |
| 8223 | <i>KRT3</i>                   | 57088   | 12 | 53189427  | missense | C | G | 0.230 | p.A134P   |
| 8223 | <i>MYO1A</i>                  | 5379    | 12 | 57430165  | missense | C | A | 0.129 | p.A759S   |
| 8223 | <i>CTDSP2</i>                 | 5730    | 12 | 58217396  | missense | G | A | 0.098 | p.R269W   |
| 8223 | <i>CTDSP2</i>                 | 5730    | 12 | 58217398  | missense | A | T | 0.091 | p.L268Q   |
| 8223 | <i>CTDSP2</i>                 | 5730    | 12 | 58217698  | missense | G | T | 0.078 | p.P227T   |
| 8223 | <i>CTDSP2</i>                 | 5730    | 12 | 58217763  | missense | C | T | 0.258 | p.R205H   |
| 8223 | <i>CTDSP2</i>                 | 5730    | 12 | 58220811  | missense | G | T | 0.063 | p.L108I   |
| 8223 | <i>CTDSP2</i>                 | 5730    | 12 | 58220831  | missense | C | G | 0.054 | p.R101T   |
| 8223 | <i>CTDSP2</i>                 | 5730    | 12 | 58240188  | missense | G | A | 0.136 | p.R11W    |
| 8223 | <i>OR4N2</i>                  | 1004723 | 14 | 20296506  | missense | A | G | 0.186 | p.K300R   |
| 8223 | <i>WDR89</i>                  | 80666   | 14 | 64066326  | missense | C | T | 0.053 | p.G112D   |
| 8223 | <i>WDR89</i>                  | 80666   | 14 | 64066352  | missense | T | A | 0.070 | p.R103S   |
| 8223 | <i>WDR89</i>                  | 80666   | 14 | 64066367  | missense | A | T | 0.075 | p.D98E    |
| 8223 | <i>WDR89</i>                  | 80666   | 14 | 64066395  | missense | C | T | 0.073 | p.C89Y    |
| 8223 | <i>WDR89</i>                  | 80666   | 14 | 64066398  | missense | G | C | 0.075 | p.A88G    |
| 8223 | <i>WDR89</i>                  | 80666   | 14 | 64066402  | missense | A | G | 0.075 | p.S87P    |
| 8223 | <i>TJP1</i>                   | 175610  | 15 | 30024889  | missense | C | T | 0.053 | p.A627T   |
| 8223 | <i>FAN1</i>                   | 14967   | 15 | 31200400  | missense | G | T | 0.180 | p.E438D   |
| 8223 | <i>PRTG</i>                   | 173814  | 15 | 55974582  | missense | G | A | 0.162 | p.A219V   |
| 8223 | <i>MESP2</i>                  | 1039958 | 15 | 90320142  | missense | G | C | 0.135 | p.G185A   |
| 8223 | <i>MESP2</i>                  | 1039958 | 15 | 90320144  | missense | C | G | 0.184 | p.Q186E   |
| 8223 | <i>LRRK1</i>                  | 24652   | 15 | 101566189 | missense | T | C | 0.154 | p.V751A   |
| 8223 | <i>ZNF423</i>                 | 15069   | 16 | 49670566  | missense | A | G | 0.111 | p.F833L   |
| 8223 | <i>CNEP1R1</i>                | 153261  | 16 | 50063692  | missense | G | C | 0.053 | p.D69H    |
| 8223 | <i>CNTROB</i>                 | 53051   | 17 | 7838410   | missense | C | T | 0.147 | p.P181S   |
| 8223 | <i>ADORA2B</i>                | 676     | 17 | 15878112  | missense | A | C | 0.074 | p.N152T   |
| 8223 | <i>EPX</i>                    | 502     | 17 | 56270883  | missense | C | G | 0.167 | p.R108G   |
| 8223 | <i>PRR12</i>                  | 20719   | 19 | 50100531  | missense | C | T | 0.160 | p.P980L   |
| 8223 | <i>EPS8L1</i>                 | 133180  | 19 | 55591145  | missense | G | A | 0.119 | p.G69S    |
| 8223 | <i>ZNF628</i>                 | 33113   | 19 | 55994860  | missense | C | T | 0.213 | p.A767V   |
| 8223 | <i>NINL</i>                   | 25176   | 20 | 25493497  | missense | C | A | 0.234 | p.W141C   |
| 8223 | <i>TOX2</i>                   | 32883   | 20 | 42694398  | missense | C | T | 0.138 | p.P294L   |
| 8223 | <i>DOK5</i>                   | 177959  | 20 | 53260028  | missense | C | T | 0.117 | p.S148L   |
| 8223 | <i>ZBTB21</i>                 | 20727   | 21 | 43412789  | missense | A | T | 0.064 | p.D472E   |
| 8223 | <i>INPP5J</i>                 | 1284286 | 22 | 31520984  | missense | G | T | 0.185 | p.A20S    |
| 8223 | <i>FAM104B</i>                | 138362  | X  | 55172686  | missense | C | T | 0.186 | p.S60N    |
| 8223 | <i>FAM104B</i>                | 138362  | X  | 55172689  | missense | G | T | 0.151 | p.A59E    |
| 8223 | <i>TCEAL5</i>                 | 1012979 | X  | 102529317 | missense | C | T | 0.166 | p.E59K    |
| 8224 | <i>KIF4B</i>                  | 1099293 | 5  | 154394617 | stopgain | G | T | 0.093 | p.E400X   |
| 8224 | <i>PARS2</i>                  | 152268  | 1  | 55223862  | missense | A | C | 0.064 | p.F325V   |
| 8224 | <i>DNAJC6</i>                 | 14787   | 1  | 65855111  | missense | C | G | 0.054 | p.Q386E   |
| 8224 | <i>ANP32E</i>                 | 30920   | 1  | 150199057 | missense | C | T | 0.053 | p.R133K   |
| 8224 | <i>IGFN1</i>                  | 1164586 | 1  | 201184240 | missense | G | T | 0.133 | p.V2985L  |
| 8224 | <i>MARK1</i>                  | 18650   | 1  | 220826523 | missense | G | A | 0.078 | p.R606Q   |
| 8224 | <i>GREB1</i>                  | 14668   | 2  | 11767223  | missense | G | A | 0.051 | p.R1481H  |
| 8224 | <i>CRYGD</i>                  | 6891    | 2  | 208986580 | missense | G | C | 0.072 | p.D114E   |
| 8224 | <i>PRKCD</i>                  | 212539  | 3  | 53223262  | missense | G | T | 0.051 | p.K581N   |

|      |           |         |    |           |          |   |   |       |          |
|------|-----------|---------|----|-----------|----------|---|---|-------|----------|
| 8224 | ZNF717    | 1290209 | 3  | 75788230  | missense | C | T | 0.118 | p.V132I  |
| 8224 | AGTR1     | 32049   | 3  | 148459037 | missense | T | A | 0.066 | p.L107Q  |
| 8224 | MME       | 7289    | 3  | 154898198 | missense | T | C | 0.056 | p.C735R  |
| 8224 | APOD      | 1647    | 3  | 195298170 | missense | C | A | 0.053 | p.K104N  |
| 8224 | FGFRL1    | 21923   | 4  | 1016167   | missense | G | A | 0.140 | p.V86M   |
| 8224 | KLB       | 175737  | 4  | 39449999  | missense | G | A | 0.102 | p.G943E  |
| 8224 | DSPP      | 14208   | 4  | 88537243  | missense | C | A | 0.124 | p.D1143E |
| 8224 | CARTPT    | 4291    | 5  | 71015710  | missense | G | A | 0.070 | p.E55K   |
| 8224 | FAM8A1    | 16255   | 6  | 17601035  | missense | A | G | 0.051 | p.H132R  |
| 8224 | HLA-DQA2  | 20056   | 6  | 32713061  | missense | C | A | 0.120 | p.Q70K   |
| 8224 | HLA-DQB2  | 1300790 | 6  | 32725636  | missense | C | T | 0.070 | p.S224N  |
| 8224 | ZNF451    | 15555   | 6  | 56993554  | missense | G | T | 0.068 | p.G114W  |
| 8224 | INTS1     | 1080453 | 7  | 1520473   | missense | C | T | 0.063 | p.R1316Q |
| 8224 | RP1L1     | 178857  | 8  | 10464982  | missense | A | G | 0.056 | p.L2209S |
| 8224 | RP1L1     | 178857  | 8  | 10465078  | missense | A | G | 0.156 | p.L2177S |
| 8224 | RP1       | 6269    | 8  | 55541231  | missense | G | C | 0.072 | p.D1597H |
| 8224 | SLC7A13   | 138817  | 8  | 87226851  | missense | T | C | 0.086 | p.T402A  |
| 8224 | ZNF251    | 138367  | 8  | 145947211 | missense | G | T | 0.061 | p.H612N  |
| 8224 | ZNF16     | 6958    | 8  | 146156611 | missense | T | A | 0.085 | p.E521V  |
| 8224 | PIP5K1B   | 3558    | 9  | 71532569  | missense | G | A | 0.097 | p.D293N  |
| 8224 | AGTBPB1   | 15239   | 9  | 88207536  | missense | G | A | 0.066 | p.P796L  |
| 8224 | ZNF462    | 21224   | 9  | 109690694 | missense | G | C | 0.058 | p.A1501P |
| 8224 | AK8       | 152572  | 9  | 135601256 | missense | T | C | 0.141 | p.Q420R  |
| 8224 | MYO3A     | 17433   | 10 | 26463103  | missense | G | C | 0.069 | p.E1304Q |
| 8224 | SPOCK2    | 14767   | 10 | 73823984  | missense | C | T | 0.089 | p.A315T  |
| 8224 | ATE1      | 7041    | 10 | 123673314 | missense | T | G | 0.108 | p.S110R  |
| 8224 | PAOX      | 207128  | 10 | 135202506 | missense | T | A | 0.053 | p.F390I  |
| 8224 | SAAL1     | 138421  | 11 | 18127530  | missense | A | T | 0.133 | p.V20E   |
| 8224 | MYBPC3    | 256     | 11 | 47359008  | missense | C | T | 0.107 | p.V846I  |
| 8224 | MYBPC3    | 256     | 11 | 47363576  | missense | G | A | 0.073 | p.P586S  |
| 8224 | CTTN      | 138565  | 11 | 70275265  | missense | A | G | 0.085 | p.K379R  |
| 8224 | ME3       | 6680    | 11 | 86158130  | missense | C | T | 0.075 | p.E453K  |
| 8224 | KCNH3     | 12284   | 12 | 49948302  | missense | A | T | 0.052 | p.S701C  |
| 8224 | KRT3      | 57088   | 12 | 53189427  | missense | C | G | 0.080 | p.A134P  |
| 8224 | CTDSP2    | 5730    | 12 | 58217763  | missense | C | T | 0.159 | p.R205H  |
| 8224 | CTDSP2    | 5730    | 12 | 58220801  | missense | G | T | 0.052 | p.T111N  |
| 8224 | CTDSP2    | 5730    | 12 | 58220811  | missense | G | T | 0.069 | p.L108I  |
| 8224 | CTDSP2    | 5730    | 12 | 58220819  | missense | A | G | 0.061 | p.V105A  |
| 8224 | CTDSP2    | 5730    | 12 | 58220831  | missense | C | A | 0.092 | p.R101M  |
| 8224 | CTDSP2    | 5730    | 12 | 58240188  | missense | G | A | 0.060 | p.R111W  |
| 8224 | PABPC3    | 30979   | 13 | 25670691  | missense | G | T | 0.055 | p.V119F  |
| 8224 | PABPC3    | 30979   | 13 | 25670703  | missense | G | T | 0.051 | p.G123C  |
| 8224 | PABPC3    | 30979   | 13 | 25670712  | missense | C | G | 0.051 | p.L126V  |
| 8224 | WDR89     | 80666   | 14 | 64066395  | missense | C | T | 0.050 | p.C89Y   |
| 8224 | WDR89     | 80666   | 14 | 64066398  | missense | G | C | 0.051 | p.A88G   |
| 8224 | WDR89     | 80666   | 14 | 64066402  | missense | A | G | 0.052 | p.S87P   |
| 8224 | RPAP1     | 15540   | 15 | 41813991  | missense | C | T | 0.110 | p.E995K  |
| 8224 | GNB5      | 16194   | 15 | 52476780  | missense | G | T | 0.050 | p.Q32K   |
| 8224 | MESP2     | 1039958 | 15 | 90320144  | missense | C | G | 0.121 | p.Q186E  |
| 8224 | CHTF18    | 22092   | 16 | 838769    | missense | C | A | 0.122 | p.L29M   |
| 8224 | PRRT2     | 145239  | 16 | 29824913  | missense | G | A | 0.126 | p.E180K  |
| 8224 | COX6A2    | 5205    | 16 | 31439159  | missense | C | T | 0.058 | p.G77D   |
| 8224 | RAI1      | 30665   | 17 | 17697096  | missense | G | C | 0.078 | p.Q278H  |
| 8224 | STAT3     | 213662  | 17 | 40474420  | missense | C | A | 0.080 | p.D661Y  |
| 8224 | LRRC30    | 1105581 | 18 | 7231350   | missense | G | A | 0.078 | p.E72K   |
| 8224 | CACTIN    | 21231   | 19 | 3626711   | missense | C | T | 0.126 | p.R17Q   |
| 8224 | ADAMTS10  | 30957   | 19 | 8654809   | missense | G | A | 0.065 | p.R622C  |
| 8225 | DHX29     | 19030   | 5  | 54581642  | stopgain | G | A | 0.235 | p.R372X  |
| 8225 | UHRF1BP1L | 15054   | 12 | 100466506 | stopgain | G | C | 0.180 | p.S498X  |
| 8225 | WDR89     | 80666   | 14 | 64066363  | stopgain | G | A | 0.056 | p.R100X  |
| 8225 | KIR2DL4   | 2255    | 19 | 55320307  | stopgain | G | A | 0.121 | p.W225X  |
| 8225 | ANP32E    | 30920   | 1  | 150199057 | missense | C | T | 0.067 | p.R133K  |
| 8225 | AGPS      | 3659    | 2  | 178372759 | missense | G | T | 0.059 | p.R536M  |
| 8225 | SYNPO2    | 133477  | 4  | 119947964 | missense | G | A | 0.133 | p.R147K  |
| 8225 | PCDH18    | 19035   | 4  | 138451620 | missense | G | C | 0.267 | p.I541M  |
| 8225 | FREM3     | 1168235 | 4  | 144621404 | missense | T | A | 0.056 | p.Q142L  |
| 8225 | ITGA1     | 181501  | 5  | 52145270  | missense | G | T | 0.075 | p.D45Y   |
| 8225 | FAM8A1    | 16255   | 6  | 17601035  | missense | A | G | 0.056 | p.H132R  |
| 8225 | FAM8A1    | 16255   | 6  | 17601040  | missense | G | A | 0.052 | p.G134S  |
| 8225 | FAM8A1    | 16255   | 6  | 17601041  | missense | G | T | 0.052 | p.G134V  |
| 8225 | FAM8A1    | 16255   | 6  | 17601044  | missense | T | C | 0.050 | p.L135P  |
| 8225 | FAM8A1    | 16255   | 6  | 17601058  | missense | G | A | 0.059 | p.A140T  |
| 8225 | FAM8A1    | 16255   | 6  | 17601086  | missense | A | G | 0.063 | p.Q149R  |
| 8225 | IBTK      | 15525   | 6  | 82921225  | missense | C | T | 0.056 | p.V786I  |
| 8225 | RP1       | 6269    | 8  | 55534680  | missense | C | T | 0.250 | p.P207S  |
| 8225 | GDF2      | 16204   | 10 | 48414067  | missense | C | A | 0.258 | p.E267D  |
| 8225 | CTBP2     | 22802   | 10 | 126692019 | missense | G | A | 0.093 | p.P34L   |
| 8225 | ARNTL2    | 20183   | 12 | 27553559  | missense | A | G | 0.238 | p.K338E  |
| 8225 | CTDSP2    | 5730    | 12 | 58217698  | missense | G | T | 0.094 | p.P227T  |
| 8225 | CTDSP2    | 5730    | 12 | 58217763  | missense | C | T | 0.267 | p.R205H  |
| 8225 | CTDSP2    | 5730    | 12 | 58220801  | missense | G | T | 0.079 | p.T111N  |

|      |                 |         |    |           |          |   |   |       |          |
|------|-----------------|---------|----|-----------|----------|---|---|-------|----------|
| 8225 | <i>CTDSP2</i>   | 5730    | 12 | 58220811  | missense | G | T | 0.070 | p.L108I  |
| 8225 | <i>CTDSP2</i>   | 5730    | 12 | 58220819  | missense | A | G | 0.055 | p.V105A  |
| 8225 | <i>CTDSP2</i>   | 5730    | 12 | 58220831  | missense | C | G | 0.084 | p.R101T  |
| 8225 | <i>CTDSP2</i>   | 5730    | 12 | 58240188  | missense | G | A | 0.093 | p.R111W  |
| 8225 | <i>HSP90B1</i>  | 3299    | 12 | 104341190 | missense | A | T | 0.064 | p.E788D  |
| 8225 | <i>TBC1D4</i>   | 14832   | 13 | 75936391  | missense | G | T | 0.268 | p.A284D  |
| 8225 | <i>WDR89</i>    | 80666   | 14 | 64066367  | missense | A | T | 0.061 | p.D98E   |
| 8225 | <i>WDR89</i>    | 80666   | 14 | 64066395  | missense | C | T | 0.068 | p.C89Y   |
| 8225 | <i>WDR89</i>    | 80666   | 14 | 64066398  | missense | G | C | 0.069 | p.A88G   |
| 8225 | <i>WDR89</i>    | 80666   | 14 | 64066402  | missense | A | G | 0.075 | p.S87P   |
| 8225 | <i>TEX9</i>     | 198524  | 15 | 56704590  | missense | G | A | 0.129 | p.E307K  |
| 8225 | <i>BAIAP3</i>   | 3933    | 16 | 1397317   | missense | C | A | 0.077 | p.H959N  |
| 8225 | <i>APOBR</i>    | 18690   | 16 | 28507445  | missense | G | C | 0.111 | p.E361D  |
| 8225 | <i>APOBR</i>    | 18690   | 16 | 28507452  | missense | G | T | 0.075 | p.G364W  |
| 8225 | <i>KCTD1</i>    | 1142730 | 18 | 24126882  | missense | A | G | 0.057 | p.V540A  |
| 8225 | <i>KANK3</i>    | 198471  | 19 | 8400400   | missense | C | T | 0.066 | p.G104D  |
| 8225 | <i>SHANK1</i>   | 16148   | 19 | 51165712  | missense | G | C | 0.237 | p.P1999R |
| 8225 | <i>KIR2DL4</i>  | 2255    | 19 | 55320306  | missense | G | C | 0.133 | p.W225S  |
| 8225 | <i>KIR2DL4</i>  | 2255    | 19 | 55320308  | missense | C | T | 0.125 | p.P226S  |
| 8225 | <i>KIR3DL2</i>  | 6737    | 19 | 55377265  | missense | T | C | 0.133 | p.C336R  |
| 8225 | <i>KIR3DL2</i>  | 6737    | 19 | 55377280  | missense | G | A | 0.140 | p.V341I  |
| 8229 | <i>KDM5B</i>    | 6618    | 1  | 202702651 | stopgain | G | A | 0.290 | p.Q1263X |
| 8229 | <i>ACSBG1</i>   | 15162   | 15 | 78466801  | stopgain | C | A | 0.182 | p.E590X  |
| 8229 | <i>LMTK3</i>    | 1080434 | 19 | 49001508  | stopgain | C | A | 0.098 | p.E969X  |
| 8229 | <i>SLC45A1</i>  | 1080397 | 1  | 8385982   | missense | G | A | 0.154 | p.G233S  |
| 8229 | <i>HOXD10</i>   | 2148    | 2  | 176982245 | missense | G | C | 0.211 | p.E228D  |
| 8229 | <i>KLAA1919</i> | 153369  | 6  | 111587637 | missense | G | T | 0.174 | p.C291F  |
| 8229 | <i>NPTX2</i>    | 2523    | 7  | 98254284  | missense | C | T | 0.118 | p.R232C  |
| 8229 | <i>CALU</i>     | 1219    | 7  | 128394410 | missense | T | C | 0.160 | p.Y114H  |
| 8229 | <i>UBN2</i>     | 173569  | 7  | 138967999 | missense | G | T | 0.138 | p.G783V  |
| 8229 | <i>UBN2</i>     | 173569  | 7  | 138968004 | missense | C | T | 0.138 | p.P785S  |
| 8229 | <i>NEFL</i>     | 6158    | 8  | 24813998  | missense | G | A | 0.174 | p.S11L   |
| 8229 | <i>CSMD3</i>    | 198124  | 8  | 113988302 | missense | G | T | 0.211 | p.A329D  |
| 8229 | <i>CSMD3</i>    | 198124  | 8  | 113988318 | missense | T | C | 0.235 | p.T324A  |
| 8229 | <i>FAM120A</i>  | 198841  | 9  | 96214599  | missense | A | C | 0.182 | p.F131L  |
| 8229 | <i>FAM120A</i>  | 198841  | 9  | 96214626  | missense | C | T | 0.222 | p.M122I  |
| 8229 | <i>GRIN3A</i>   | 133445  | 9  | 104433036 | missense | G | A | 0.222 | p.T553I  |
| 8229 | <i>AKAP2</i>    | 147150  | 9  | 112900432 | missense | G | A | 0.182 | p.V870I  |
| 8229 | <i>OLFM1</i>    | 14279   | 9  | 137998639 | missense | A | G | 0.261 | p.T223A  |
| 8229 | <i>HNRNPF</i>   | 4966    | 10 | 43882621  | missense | T | C | 0.222 | p.T238A  |
| 8229 | <i>HNRNPF</i>   | 4966    | 10 | 43882646  | missense | T | A | 0.211 | p.E229D  |
| 8229 | <i>LZTS2</i>    | 32429   | 10 | 102763609 | missense | T | C | 0.125 | p.S252P  |
| 8229 | <i>OR51E1</i>   | 152430  | 11 | 4674060   | missense | C | G | 0.182 | p.L102V  |
| 8229 | <i>OR5P3</i>    | 153445  | 11 | 7846768   | missense | A | T | 0.188 | p.F251Y  |
| 8229 | <i>OR5P3</i>    | 153445  | 11 | 7846826   | missense | T | C | 0.250 | p.K232E  |
| 8229 | <i>HIPK3</i>    | 5734    | 11 | 33374842  | missense | A | T | 0.148 | p.T1126S |
| 8229 | <i>MUS81</i>    | 25128   | 11 | 65632742  | missense | G | C | 0.231 | p.V485L  |
| 8229 | <i>MUS81</i>    | 25128   | 11 | 65632766  | missense | C | G | 0.233 | p.L493V  |
| 8229 | <i>CTDSP2</i>   | 5730    | 12 | 58217698  | missense | G | T | 0.222 | p.P227T  |
| 8229 | <i>CTDSP2</i>   | 5730    | 12 | 58217770  | missense | G | C | 0.175 | p.L203V  |
| 8229 | <i>HSPA2</i>    | 21979   | 14 | 65008111  | missense | A | C | 0.196 | p.I182L  |
| 8229 | <i>PEAK1</i>    | 24776   | 15 | 77425525  | missense | T | C | 0.200 | p.K1300R |
| 8229 | <i>PEAK1</i>    | 24776   | 15 | 77425556  | missense | T | G | 0.200 | p.I1290L |
| 8229 | <i>MYLK3</i>    | 182493  | 16 | 46764595  | missense | G | A | 0.222 | p.P493L  |
| 8229 | <i>IRX6</i>     | 24335   | 16 | 55362984  | missense | G | C | 0.200 | p.G365A  |
| 8229 | <i>CDH11</i>    | 1797    | 16 | 65032548  | missense | A | T | 0.200 | p.V147D  |
| 8229 | <i>FAM222B</i>  | 18182   | 17 | 27085327  | missense | C | A | 0.133 | p.E422D  |
| 8229 | <i>MRPS23</i>   | 16070   | 17 | 55917265  | missense | G | T | 0.211 | p.S151Y  |
| 8229 | <i>NDUFS7</i>   | 24407   | 19 | 1390927   | missense | A | G | 0.261 | p.M96V   |
| 8229 | <i>ZNF575</i>   | 174945  | 19 | 44039702  | missense | C | T | 0.276 | p.P201S  |
| 8229 | <i>KLK2</i>     | 5551    | 19 | 51378030  | missense | C | A | 0.211 | p.H34N   |
| 8229 | <i>ZBED4</i>    | 14838   | 22 | 50279289  | missense | G | A | 0.167 | p.S660N  |
| 8229 | <i>ZBED4</i>    | 14838   | 22 | 50279333  | missense | T | C | 0.235 | p.F675L  |
| 8234 | <i>PARP6</i>    | 20214   | 15 | 72552908  | stopgain | C | A | 0.105 | p.E223X  |
| 8234 | <i>AP3B2</i>    | 4644    | 15 | 83346477  | stopgain | G | A | 0.148 | p.R442X  |
| 8234 | <i>TNRC6B</i>   | 15088   | 22 | 40704647  | stopgain | A | T | 0.068 | p.K614X  |
| 8234 | <i>SZT2</i>     | 15284   | 1  | 43892466  | missense | G | A | 0.052 | p.A1042T |
| 8234 | <i>FLG</i>      | 2016    | 1  | 152278762 | missense | A | C | 0.079 | p.I2867S |
| 8234 | <i>FLG</i>      | 2016    | 1  | 152278772 | missense | G | A | 0.067 | p.H2864Y |
| 8234 | <i>KDM5B</i>    | 6618    | 1  | 202722082 | missense | T | C | 0.155 | p.Q551R  |
| 8234 | <i>TRANK1</i>   | 14831   | 3  | 36900272  | missense | T | C | 0.121 | p.I493V  |
| 8234 | <i>CELSR3</i>   | 1407    | 3  | 48694259  | missense | G | A | 0.068 | p.P1424L |
| 8234 | <i>ZNF717</i>   | 1290209 | 3  | 75788230  | missense | C | T | 0.100 | p.V132I  |
| 8234 | <i>KLAA0226</i> | 14687   | 3  | 197401980 | missense | G | C | 0.071 | p.A898G  |
| 8234 | <i>MFAP3L</i>   | 21647   | 4  | 170912543 | missense | C | T | 0.188 | p.E406K  |
| 8234 | <i>BMP6</i>     | 1718    | 6  | 7727516   | missense | C | G | 0.054 | p.Q110E  |
| 8234 | <i>VARS</i>     | 6295    | 6  | 31748301  | missense | G | T | 0.057 | p.H948N  |
| 8234 | <i>VARS</i>     | 6295    | 6  | 31749302  | missense | C | T | 0.070 | p.V834I  |
| 8234 | <i>PPP2R5D</i>  | 180977  | 6  | 42978300  | missense | A | G | 0.070 | p.K460E  |
| 8234 | <i>ZNF318</i>   | 14345   | 6  | 43306014  | missense | G | T | 0.103 | p.P1908T |
| 8234 | <i>TFAP2B</i>   | 3221    | 6  | 50791525  | missense | G | T | 0.060 | p.G163C  |

|      |                 |         |    |           |          |   |   |       |          |
|------|-----------------|---------|----|-----------|----------|---|---|-------|----------|
| 8234 | <i>NT5E</i>     | 2526    | 6  | 86203600  | missense | A | G | 0.133 | p.M535V  |
| 8234 | <i>EPHX2</i>    | 1979    | 8  | 27382958  | missense | G | T | 0.050 | p.V380L  |
| 8234 | <i>OPTN</i>     | 21980   | 10 | 13151198  | missense | C | G | 0.075 | p.H26D   |
| 8234 | <i>SKIDA1</i>   | 207371  | 10 | 21805466  | missense | C | T | 0.143 | p.G429E  |
| 8234 | <i>OGDHL</i>    | 18245   | 10 | 50953473  | missense | G | T | 0.067 | p.Q516K  |
| 8234 | <i>MTG1</i>     | 138384  | 10 | 135207827 | missense | A | C | 0.076 | p.M35L   |
| 8234 | <i>CD5</i>      | 14207   | 11 | 60893246  | missense | T | C | 0.061 | p.S475P  |
| 8234 | <i>NANOGNB</i>  | 1145465 | 12 | 7917933   | missense | G | A | 0.070 | p.E18K   |
| 8234 | <i>TSM</i>      | 5726    | 12 | 58176630  | missense | G | A | 0.078 | p.G16R   |
| 8234 | <i>CTDSP2</i>   | 5730    | 12 | 58217698  | missense | G | T | 0.071 | p.P227T  |
| 8234 | <i>CTDSP2</i>   | 5730    | 12 | 58217763  | missense | C | T | 0.203 | p.R205H  |
| 8234 | <i>CTDSP2</i>   | 5730    | 12 | 58220801  | missense | G | T | 0.094 | p.T111N  |
| 8234 | <i>CTDSP2</i>   | 5730    | 12 | 58220811  | missense | G | T | 0.167 | p.L108I  |
| 8234 | <i>CTDSP2</i>   | 5730    | 12 | 58220831  | missense | C | A | 0.114 | p.R101M  |
| 8234 | <i>OASI</i>     | 16816   | 12 | 113346378 | missense | G | T | 0.107 | p.R73L   |
| 8234 | <i>PTPN21</i>   | 7039    | 14 | 88935980  | missense | C | T | 0.069 | p.R1033H |
| 8234 | <i>MESP2</i>    | 1039958 | 15 | 90320144  | missense | C | G | 0.135 | p.Q186E  |
| 8234 | <i>IDH2</i>     | 2168    | 15 | 90630400  | missense | A | T | 0.159 | p.F304Y  |
| 8234 | <i>ITPR1PL2</i> | 1034841 | 16 | 19126778  | missense | C | T | 0.085 | p.A332V  |
| 8234 | <i>PRPF8</i>    | 6445    | 17 | 1579819   | missense | G | A | 0.051 | p.R790W  |
| 8234 | <i>PELP1</i>    | 14389   | 17 | 4579124   | missense | A | C | 0.054 | p.C199G  |
| 8234 | <i>KIAA0100</i> | 14680   | 17 | 26960681  | missense | C | A | 0.074 | p.K1117N |
| 8234 | <i>MED1</i>     | 4774    | 17 | 37565055  | missense | G | C | 0.100 | p.S1140C |
| 8234 | <i>NDUFS7</i>   | 24407   | 19 | 1390996   | missense | G | C | 0.141 | p.V119L  |
| 8234 | <i>NDUFS7</i>   | 24407   | 19 | 1393289   | missense | G | C | 0.064 | p.R168S  |
| 8234 | <i>KDM4B</i>    | 15015   | 19 | 5071042   | missense | C | G | 0.100 | p.H216Q  |
| 8234 | <i>USHBP1</i>   | 31941   | 19 | 17367384  | missense | G | A | 0.054 | p.P456S  |
| 8234 | <i>GPI</i>      | 1289790 | 19 | 34890626  | missense | A | C | 0.052 | p.M532L  |
| 8234 | <i>GPI</i>      | 1289790 | 19 | 34890628  | missense | G | C | 0.167 | p.M532I  |
| 8234 | <i>TPRX1</i>    | 198479  | 19 | 48305624  | missense | A | T | 0.120 | p.I215N  |
| 8234 | <i>VSIG10L</i>  | 1163922 | 19 | 51842384  | missense | C | A | 0.118 | p.G496V  |
| 8234 | <i>PYGB</i>     | 2862    | 20 | 25273104  | missense | G | A | 0.110 | p.G678S  |
| 8742 | <i>PRMT6</i>    | 18137   | 1  | 107599501 | stopgain | C | A | 0.100 | p.S55X   |
| 8742 | <i>LBX2</i>     | 1282430 | 2  | 74726463  | stopgain | C | A | 0.154 | p.E68X   |
| 8742 | <i>DCHS2</i>    | 17639   | 4  | 155156181 | stopgain | G | T | 0.138 | p.S2753X |
| 8742 | <i>FBN2</i>     | 1999    | 5  | 127710336 | stopgain | C | A | 0.138 | p.G694X  |
| 8742 | <i>TGFBI</i>    | 358     | 5  | 135382088 | stopgain | C | A | 0.174 | p.Y121X  |
| 8742 | <i>PCSK5</i>    | 6200    | 9  | 78506128  | stopgain | G | T | 0.174 | p.G11X   |
| 8742 | <i>FAM196A</i>  | 1039762 | 10 | 128973889 | stopgain | G | T | 0.105 | p.Y257X  |
| 8742 | <i>ANAPC5</i>   | 16237   | 12 | 121790117 | stopgain | G | T | 0.154 | p.Y9X    |
| 8742 | <i>HHP1L1</i>   | 32425   | 14 | 100118650 | stopgain | C | A | 0.167 | p.C115X  |
| 8742 | <i>PABPN1L</i>  | 1294328 | 16 | 88931980  | stopgain | G | T | 0.129 | p.Y150X  |
| 8742 | <i>CELSR1</i>   | 14246   | 22 | 46790048  | stopgain | G | T | 0.118 | p.C1985X |
| 8742 | <i>GPR153</i>   | 207370  | 1  | 6314791   | missense | C | T | 0.118 | p.V59M   |
| 8742 | <i>CELA2A</i>   | 33440   | 1  | 15793931  | missense | G | T | 0.111 | p.Q230H  |
| 8742 | <i>LCK</i>      | 5356    | 1  | 32742270  | missense | G | T | 0.148 | p.D283Y  |
| 8742 | <i>BEST4</i>    | 153274  | 1  | 45253257  | missense | C | A | 0.133 | p.A41S   |
| 8742 | <i>UBAP2L</i>   | 14847   | 1  | 154207713 | missense | G | A | 0.167 | p.G164R  |
| 8742 | <i>PRRC2C</i>   | 15172   | 1  | 171501914 | missense | C | A | 0.167 | p.Q561K  |
| 8742 | <i>FBXO41</i>   | 1080410 | 2  | 73487950  | missense | C | A | 0.143 | p.Q736H  |
| 8742 | <i>CNNM4</i>    | 20184   | 2  | 97427326  | missense | G | A | 0.111 | p.G197D  |
| 8742 | <i>TGFBRAP1</i> | 4257    | 2  | 105924428 | missense | G | T | 0.167 | p.P111T  |
| 8742 | <i>TRPM8</i>    | 24080   | 2  | 234873293 | missense | G | A | 0.143 | p.A591T  |
| 8742 | <i>BRPF1</i>    | 4634    | 3  | 9784849   | missense | G | T | 0.118 | p.Q735H  |
| 8742 | <i>CLDN11</i>   | 5602    | 3  | 170141049 | missense | G | A | 0.200 | p.G109S  |
| 8742 | <i>FGFRL1</i>   | 21923   | 4  | 1019049   | missense | G | C | 0.143 | p.D477H  |
| 8742 | <i>SH3TC1</i>   | 18986   | 4  | 8229780   | missense | C | A | 0.118 | p.P787T  |
| 8742 | <i>ANK2</i>     | 1148    | 4  | 114275589 | missense | G | A | 0.182 | p.V1939I |
| 8742 | <i>TRIO</i>     | 7118    | 5  | 14461146  | missense | G | T | 0.133 | p.S174I  |
| 8742 | <i>FBXL7</i>    | 12304   | 5  | 15937252  | missense | G | T | 0.138 | p.C478F  |
| 8742 | <i>PCDHGA2</i>  | 32009   | 5  | 140718811 | missense | C | A | 0.167 | p.D91E   |
| 8742 | <i>SLC6A7</i>   | 14228   | 5  | 149585083 | missense | C | A | 0.182 | p.P533H  |
| 8742 | <i>LMAN2</i>    | 6816    | 5  | 176778484 | missense | C | A | 0.118 | p.K55N   |
| 8742 | <i>HIST1H3H</i> | 3536    | 6  | 27777904  | missense | G | A | 0.125 | p.R18H   |
| 8742 | <i>BRPF3</i>    | 15695   | 6  | 36168330  | missense | C | A | 0.111 | p.N77K   |
| 8742 | <i>MDF1</i>     | 5586    | 6  | 41621211  | missense | C | A | 0.073 | p.D213E  |
| 8742 | <i>DOPEY1</i>   | 15018   | 6  | 83877616  | missense | G | T | 0.167 | p.L2387F |
| 8742 | <i>TSPYL4</i>   | 21648   | 6  | 116574504 | missense | C | A | 0.167 | p.R223M  |
| 8742 | <i>ARID1B</i>   | 20732   | 6  | 157099497 | missense | G | A | 0.108 | p.G145D  |
| 8742 | <i>FNDC1</i>    | 32532   | 6  | 159660756 | missense | C | A | 0.125 | p.T1463N |
| 8742 | <i>ZNF282</i>   | 3575    | 7  | 148921353 | missense | C | T | 0.125 | p.R544W  |
| 8742 | <i>ERICH1</i>   | 207332  | 8  | 623664    | missense | T | C | 0.105 | p.R230G  |
| 8742 | <i>SGK223</i>   | 1080826 | 8  | 8234037   | missense | C | A | 0.121 | p.A628S  |
| 8742 | <i>NKX3-1</i>   | 6167    | 8  | 23538975  | missense | G | T | 0.138 | p.A80D   |
| 8742 | <i>MROH6</i>    | 1100878 | 8  | 144652416 | missense | G | C | 0.143 | p.A347G  |
| 8742 | <i>SLC52A2</i>  | 24531   | 8  | 145584487 | missense | G | A | 0.100 | p.G384S  |
| 8742 | <i>CDK9</i>     | 1261    | 9  | 130551745 | missense | C | A | 0.154 | p.Q348K  |
| 8742 | <i>WDR34</i>    | 52844   | 9  | 131396150 | missense | G | T | 0.118 | p.T495N  |
| 8742 | <i>SURF4</i>    | 33161   | 9  | 136242815 | missense | G | A | 0.154 | p.T9M    |
| 8742 | <i>ARHGAP22</i> | 21226   | 10 | 49667783  | missense | G | T | 0.138 | p.N201K  |
| 8742 | <i>NODAL</i>    | 18055   | 10 | 72195308  | missense | C | A | 0.111 | p.G209W  |

|      |                  |         |    |           |          |   |   |       |          |
|------|------------------|---------|----|-----------|----------|---|---|-------|----------|
| 8742 | <i>CDH23</i>     | 52836   | 10 | 73326586  | missense | C | A | 0.148 | p.P173T  |
| 8742 | <i>DNAJC9</i>    | 15190   | 10 | 75006880  | missense | C | A | 0.182 | p.R23L   |
| 8742 | <i>CALHM1</i>    | 1001412 | 10 | 105215453 | missense | G | T | 0.105 | p.R203S  |
| 8742 | <i>SH3PXD2A</i>  | 14631   | 10 | 105362265 | missense | G | T | 0.154 | p.P876T  |
| 8742 | <i>COL17A1</i>   | 494     | 10 | 105801078 | missense | C | A | 0.129 | p.G877V  |
| 8742 | <i>PHRF1</i>     | 20901   | 11 | 607951    | missense | C | A | 0.100 | p.P831Q  |
| 8742 | <i>TMEM132A</i>  | 178031  | 11 | 60701078  | missense | G | A | 0.091 | p.R474Q  |
| 8742 | <i>FADS2</i>     | 4265    | 11 | 61631233  | missense | C | G | 0.143 | p.H378D  |
| 8742 | <i>TIGD3</i>     | 145719  | 11 | 65124393  | missense | C | A | 0.095 | p.P372T  |
| 8742 | <i>SNX32</i>     | 152760  | 11 | 65618581  | missense | G | T | 0.111 | p.R220L  |
| 8742 | <i>CARNS1</i>    | 20811   | 11 | 67187268  | missense | G | T | 0.093 | p.V358L  |
| 8742 | <i>NDUFS8</i>    | 2496    | 11 | 67803789  | missense | A | G | 0.100 | p.T148A  |
| 8742 | <i>NDUFS8</i>    | 2496    | 11 | 67803790  | missense | C | T | 0.102 | p.T148I  |
| 8742 | <i>NDUFS8</i>    | 2496    | 11 | 67803810  | missense | T | C | 0.116 | p.F155L  |
| 8742 | <i>NDUFS8</i>    | 2496    | 11 | 67803812  | missense | C | G | 0.114 | p.F155L  |
| 8742 | <i>PHLDB1</i>    | 15157   | 11 | 118514555 | missense | C | A | 0.148 | p.P972H  |
| 8742 | <i>SORL1</i>     | 3105    | 11 | 121460062 | missense | G | T | 0.167 | p.M1347I |
| 8742 | <i>SORL1</i>     | 3105    | 11 | 121474927 | missense | G | T | 0.129 | p.M1515I |
| 8742 | <i>NINJ2</i>     | 16533   | 12 | 772597    | missense | G | T | 0.174 | p.A23E   |
| 8742 | <i>GPR162</i>    | 19858   | 12 | 6933440   | missense | C | G | 0.105 | p.R126G  |
| 8742 | <i>C12orf57</i>  | 138425  | 12 | 7053335   | missense | G | T | 0.160 | p.K17N   |
| 8742 | <i>LPCAT3</i>    | 5768    | 12 | 7125700   | missense | C | T | 0.121 | p.G10E   |
| 8742 | <i>FOXJ2</i>     | 18416   | 12 | 8202111   | missense | G | T | 0.125 | p.R494L  |
| 8742 | <i>NCKAP5L</i>   | 1037806 | 12 | 50188843  | missense | G | T | 0.129 | p.R934S  |
| 8742 | <i>KRT1</i>      | 6121    | 12 | 53069161  | missense | C | A | 0.125 | p.S584I  |
| 8742 | <i>NFE2</i>      | 6163    | 12 | 54686517  | missense | C | A | 0.174 | p.A255S  |
| 8742 | <i>NFE2</i>      | 6163    | 12 | 54686606  | missense | C | A | 0.138 | p.R225L  |
| 8742 | <i>CDK2</i>      | 52827   | 12 | 56362706  | missense | G | T | 0.182 | p.V154F  |
| 8742 | <i>ATP5B</i>     | 1686    | 12 | 57039057  | missense | C | T | 0.154 | p.V70M   |
| 8742 | <i>DTX3</i>      | 178502  | 12 | 58002436  | missense | G | A | 0.148 | p.G295D  |
| 8742 | <i>CTDSP2</i>    | 5730    | 12 | 58217770  | missense | G | T | 0.163 | p.L203I  |
| 8742 | <i>CTDSP2</i>    | 5730    | 12 | 58220801  | missense | G | T | 0.200 | p.T111N  |
| 8742 | <i>KCNMB4</i>    | 14505   | 12 | 70760817  | missense | C | A | 0.108 | p.H101Q  |
| 8742 | <i>TMEM119</i>   | 181724  | 12 | 108985450 | missense | G | A | 0.154 | p.S237L  |
| 8742 | <i>KSR2</i>      | 173598  | 12 | 118105410 | missense | C | A | 0.108 | p.S318I  |
| 8742 | <i>UBAC2</i>     | 177967  | 13 | 99853763  | missense | G | T | 0.125 | p.G33V   |
| 8742 | <i>IL25</i>      | 172314  | 14 | 23844968  | missense | C | A | 0.125 | p.T122N  |
| 8742 | <i>ZFHX2</i>     | 33400   | 14 | 23992091  | missense | C | A | 0.182 | p.V2267L |
| 8742 | <i>PLEKHG3</i>   | 15549   | 14 | 65209783  | missense | G | A | 0.121 | p.G952R  |
| 8742 | <i>SIPA1L1</i>   | 15556   | 14 | 72200404  | missense | G | T | 0.133 | p.S1649I |
| 8742 | <i>VRTN</i>      | 18228   | 14 | 74823993  | missense | C | A | 0.095 | p.S169R  |
| 8742 | <i>LTBP2</i>     | 428     | 14 | 74973927  | missense | C | A | 0.103 | p.G1288C |
| 8742 | <i>C14orf178</i> | 174943  | 14 | 78235848  | missense | G | A | 0.154 | p.A66T   |
| 8742 | <i>RTL1</i>      | 1134888 | 14 | 101347478 | missense | C | A | 0.174 | p.Q1216H |
| 8742 | <i>RPAP1</i>     | 15540   | 15 | 41813182  | missense | C | A | 0.108 | p.A1068S |
| 8742 | <i>RGMA</i>      | 20211   | 15 | 93595629  | missense | C | T | 0.129 | p.R80H   |
| 8742 | <i>VASN</i>      | 138440  | 16 | 4431744   | missense | G | A | 0.118 | p.R289H  |
| 8742 | <i>PRRT2</i>     | 145239  | 16 | 29824547  | missense | C | A | 0.121 | p.P58T   |
| 8742 | <i>HSD3B7</i>    | 25193   | 16 | 30999412  | missense | C | A | 0.167 | p.R340S  |
| 8742 | <i>MYLK3</i>     | 182493  | 16 | 46764569  | missense | C | A | 0.138 | p.V502L  |
| 8742 | <i>SLC12A3</i>   | 1126108 | 16 | 56902284  | missense | G | T | 0.105 | p.V169F  |
| 8742 | <i>GPR97</i>     | 170776  | 16 | 57717969  | missense | C | A | 0.160 | p.A336D  |
| 8742 | <i>ENKD1</i>     | 32140   | 16 | 67698989  | missense | G | T | 0.108 | p.S121R  |
| 8742 | <i>HYDIN</i>     | 17558   | 16 | 71103286  | missense | C | A | 0.125 | p.V620L  |
| 8742 | <i>WDR81</i>     | 1163809 | 17 | 1630596   | missense | G | T | 0.167 | p.M781I  |
| 8742 | <i>USP43</i>     | 153210  | 17 | 9604699   | missense | C | T | 0.160 | p.H565Y  |
| 8742 | <i>GPR179</i>    | 1004334 | 17 | 36491566  | missense | G | T | 0.125 | p.F438L  |
| 8742 | <i>MARCH10</i>   | 152598  | 17 | 60814539  | missense | C | A | 0.121 | p.E229D  |
| 8742 | <i>UNK</i>       | 1080419 | 17 | 73808261  | missense | G | T | 0.154 | p.G128V  |
| 8742 | <i>CBX4</i>      | 3655    | 17 | 77808206  | missense | C | A | 0.148 | p.R412L  |
| 8742 | <i>TBC1D16</i>   | 19020   | 17 | 77984248  | missense | G | T | 0.129 | p.L164M  |
| 8742 | <i>SIPR4</i>     | 3775    | 19 | 3179353   | missense | G | T | 0.111 | p.C188F  |
| 8742 | <i>ANKRD24</i>   | 133475  | 19 | 4222722   | missense | C | T | 0.160 | p.P1076L |
| 8742 | <i>CLPP</i>      | 6012    | 19 | 6361895   | missense | G | T | 0.206 | p.A72S   |
| 8742 | <i>PNPLA6</i>    | 6702    | 19 | 7616308   | missense | C | A | 0.108 | p.Q710K  |
| 8742 | <i>PNPLA6</i>    | 6702    | 19 | 7623993   | missense | G | C | 0.129 | p.D1181H |
| 8742 | <i>FDX1L</i>     | 1031734 | 19 | 10426568  | missense | C | A | 0.118 | p.E38D   |
| 8742 | <i>ZNF653</i>    | 138783  | 19 | 11597646  | missense | C | T | 0.143 | p.E465K  |
| 8742 | <i>STX10</i>     | 3765    | 19 | 13256119  | missense | G | T | 0.143 | p.Q152K  |
| 8742 | <i>MAP1S</i>     | 18174   | 19 | 17844157  | missense | G | T | 0.148 | p.D982Y  |
| 8742 | <i>B3GNT3</i>    | 14256   | 19 | 17922782  | missense | G | T | 0.114 | p.A324S  |
| 8742 | <i>KIAA1683</i>  | 25249   | 19 | 18368069  | missense | C | A | 0.133 | p.C1155F |
| 8742 | <i>KLHL26</i>    | 18316   | 19 | 18779582  | missense | G | T | 0.143 | p.G459W  |
| 8742 | <i>LRP3</i>      | 2333    | 19 | 33697105  | missense | C | A | 0.129 | p.Q477K  |
| 8742 | <i>PSMC4</i>     | 153001  | 19 | 40485845  | missense | C | A | 0.105 | p.D234E  |
| 8742 | <i>B3GNT8</i>    | 198540  | 19 | 41931979  | missense | G | T | 0.105 | p.H235Q  |
| 8742 | <i>PNMAL2</i>    | 20709   | 19 | 46998050  | missense | C | A | 0.100 | p.A225S  |
| 8742 | <i>STRN4</i>     | 13403   | 19 | 47224011  | missense | G | T | 0.160 | p.R704S  |
| 8742 | <i>LAIR1</i>     | 21706   | 19 | 54872712  | missense | G | A | 0.148 | p.R59C   |
| 8742 | <i>PPP6R1</i>    | 14931   | 19 | 55758453  | missense | G | T | 0.093 | p.L7M    |
| 8742 | <i>RNF225</i>    | 1195135 | 19 | 58907676  | missense | G | T | 0.108 | p.V74L   |

|      |            |         |    |           |          |   |   |       |          |
|------|------------|---------|----|-----------|----------|---|---|-------|----------|
| 8742 | ZNF324     | 14347   | 19 | 58983484  | missense | C | T | 0.105 | p.S542L  |
| 8742 | ZBTB45     | 32792   | 19 | 59028943  | missense | C | A | 0.103 | p.C33F   |
| 8742 | DDRGGK1    | 23935   | 20 | 3171355   | missense | C | A | 0.160 | p.A297S  |
| 8742 | TNNC2      | 3279    | 20 | 44452694  | missense | G | T | 0.174 | p.D129E  |
| 8742 | CDH4       | 1794    | 20 | 60318753  | missense | G | T | 0.167 | p.V102L  |
| 8742 | KRTAP10-10 | 181688  | 21 | 46057385  | missense | G | T | 0.125 | p.W17C   |
| 8742 | KIAA1671   | 1145206 | 22 | 25424032  | missense | G | T | 0.129 | p.M22I   |
| 8742 | CCDC157    | 1017437 | 22 | 30762010  | missense | C | A | 0.154 | p.S7R    |
| 8742 | TMEM184B   | 12264   | 22 | 38617518  | missense | G | T | 0.154 | p.D328E  |
| 8742 | TBC1D22A   | 14346   | 22 | 47189494  | missense | G | T | 0.133 | p.W42C   |
| 8742 | FAM104B    | 138362  | X  | 55172689  | missense | G | T | 0.227 | p.A59E   |
| 8743 | ABHD10     | 18394   | 3  | 111710274 | stopgain | C | A | 0.060 | p.Y209X  |
| 8743 | COL4A3BP   | 31361   | 5  | 74677854  | stopgain | G | A | 0.082 | p.R641X  |
| 8743 | NSMAF      | 3580    | 8  | 59496673  | stopgain | G | A | 0.087 | p.Q916X  |
| 8743 | WDR89      | 80666   | 14 | 64066363  | stopgain | G | A | 0.120 | p.R100X  |
| 8743 | CFHR5      | 30787   | 1  | 196977695 | missense | C | A | 0.059 | p.A531E  |
| 8743 | SLC30A3    | 3459    | 2  | 27481707  | missense | C | A | 0.051 | p.G64V   |
| 8743 | COBLL1     | 14900   | 2  | 165551552 | missense | C | T | 0.053 | p.A889T  |
| 8743 | PAX3       | 181461  | 2  | 223163322 | missense | C | A | 0.055 | p.A5S    |
| 8743 | LRRC2      | 24512   | 3  | 46586717  | missense | G | A | 0.063 | p.A51V   |
| 8743 | PTPRG      | 2841    | 3  | 62267282  | missense | G | A | 0.179 | p.M1270I |
| 8743 | ZNF717     | 1290209 | 3  | 75788230  | missense | C | T | 0.070 | p.V132I  |
| 8743 | NKX6-1     | 6168    | 4  | 85419342  | missense | C | T | 0.059 | p.A14T   |
| 8743 | ARHGAP26   | 15071   | 5  | 142264883 | missense | C | A | 0.070 | p.D135E  |
| 8743 | FAM8A1     | 16255   | 6  | 17601035  | missense | A | G | 0.081 | p.H132R  |
| 8743 | FAM8A1     | 16255   | 6  | 17601040  | missense | G | A | 0.077 | p.G134S  |
| 8743 | FAM8A1     | 16255   | 6  | 17601041  | missense | G | T | 0.078 | p.G134V  |
| 8743 | FAM8A1     | 16255   | 6  | 17601044  | missense | T | C | 0.078 | p.L135P  |
| 8743 | FAM8A1     | 16255   | 6  | 17601058  | missense | G | A | 0.085 | p.A140T  |
| 8743 | FAM8A1     | 16255   | 6  | 17601086  | missense | A | G | 0.070 | p.Q149R  |
| 8743 | FAM8A1     | 16255   | 6  | 17601098  | missense | C | T | 0.070 | p.S153L  |
| 8743 | VARS       | 6295    | 6  | 31749302  | missense | C | T | 0.076 | p.V834I  |
| 8743 | HLA-DQB1   | 2123    | 6  | 32632769  | missense | T | C | 0.140 | p.Y62C   |
| 8743 | HLA-DQA2   | 20056   | 6  | 32713061  | missense | C | A | 0.061 | p.Q70K   |
| 8743 | NDUFA6     | 152416  | 8  | 96060712  | missense | C | T | 0.052 | p.R248W  |
| 8743 | NFIB       | 5596    | 9  | 14120495  | missense | C | A | 0.098 | p.D397Y  |
| 8743 | CACNA1B    | 1243812 | 9  | 140904506 | missense | G | A | 0.063 | p.A713T  |
| 8743 | ANKRD30A   | 52997   | 10 | 37414926  | missense | G | A | 0.095 | p.A15T   |
| 8743 | CTDSP2     | 5730    | 12 | 58217698  | missense | G | T | 0.060 | p.P227T  |
| 8743 | CTDSP2     | 5730    | 12 | 58217763  | missense | C | T | 0.197 | p.R205H  |
| 8743 | CTDSP2     | 5730    | 12 | 58217770  | missense | G | T | 0.091 | p.L203I  |
| 8743 | CTDSP2     | 5730    | 12 | 58220801  | missense | G | T | 0.066 | p.T111N  |
| 8743 | CTDSP2     | 5730    | 12 | 58220819  | missense | A | G | 0.062 | p.V105A  |
| 8743 | CTDSP2     | 5730    | 12 | 58240188  | missense | G | A | 0.108 | p.R111W  |
| 8743 | DDHD1      | 30637   | 14 | 53619495  | missense | T | C | 0.053 | p.S108G  |
| 8743 | WDR89      | 80666   | 14 | 64066352  | missense | T | A | 0.084 | p.R103S  |
| 8743 | WDR89      | 80666   | 14 | 64066367  | missense | A | T | 0.118 | p.D98E   |
| 8743 | WDR89      | 80666   | 14 | 64066395  | missense | C | T | 0.176 | p.C89Y   |
| 8743 | WDR89      | 80666   | 14 | 64066398  | missense | G | C | 0.176 | p.A88G   |
| 8743 | WDR89      | 80666   | 14 | 64066402  | missense | A | G | 0.180 | p.S87P   |
| 8743 | C14orf180  | 1286399 | 14 | 105055138 | missense | A | G | 0.108 | p.T153A  |
| 8743 | MEF2A      | 5587    | 15 | 100252744 | missense | C | A | 0.106 | p.P421Q  |
| 8743 | SEC14L5    | 14692   | 16 | 5058630   | missense | G | A | 0.058 | p.R594Q  |
| 8743 | HYDIN      | 1270974 | 16 | 71015346  | missense | G | C | 0.182 | p.S1486R |
| 8743 | NDUFS7     | 24407   | 19 | 1391020   | missense | A | G | 0.085 | p.T127A  |
| 8743 | NDUFS7     | 24407   | 19 | 1391021   | missense | C | T | 0.085 | p.T127I  |
| 8743 | NDUFS7     | 24407   | 19 | 1393289   | missense | G | C | 0.110 | p.R168S  |
| 8743 | TPRX1      | 198479  | 19 | 48305690  | missense | C | A | 0.154 | p.G193V  |
| 8743 | TPRX1      | 198479  | 19 | 48305696  | missense | A | T | 0.101 | p.I191N  |
| 8743 | NAPSA      | 4851    | 19 | 50864975  | missense | G | A | 0.056 | p.A138V  |
| 8743 | ZNF377     | 32679   | 19 | 52383622  | missense | G | A | 0.065 | p.T5M    |
| 8743 | MCM8       | 1281521 | 20 | 5953323   | missense | G | C | 0.105 | p.C442S  |
| 8743 | SEPT3      | 145733  | 22 | 42383224  | missense | G | A | 0.056 | p.G116S  |
| 8743 | MID1       | 33290   | X  | 10463718  | missense | C | T | 0.051 | p.R257H  |
| 8743 | FAM104B    | 1166703 | X  | 55172521  | missense | G | T | 0.207 | p.T114K  |
| 8743 | FAM104B    | 138362  | X  | 55172670  | missense | G | C | 0.070 | p.N65K   |
| 8743 | FAM104B    | 138362  | X  | 55172686  | missense | C | T | 0.146 | p.S60N   |
| 9612 | KCNJ3      | 2239    | 2  | 155711794 | stopgain | T | G | 0.138 | p.L492X  |
| 9612 | WDR89      | 80666   | 14 | 64066363  | stopgain | G | A | 0.095 | p.R100X  |
| 9612 | ABCA3      | 1089    | 16 | 2350068   | stopgain | C | A | 0.179 | p.E517X  |
| 9612 | PADI2      | 7365    | 1  | 17445817  | missense | G | A | 0.103 | p.A17V   |
| 9612 | POGZ       | 207171  | 1  | 151403237 | missense | T | A | 0.188 | p.T122S  |
| 9612 | LCE2A      | 178428  | 1  | 152671555 | missense | T | C | 0.158 | p.C60R   |
| 9612 | IVL        | 5547    | 1  | 152883178 | missense | A | C | 0.196 | p.Q302P  |
| 9612 | LTBP1      | 206943  | 2  | 33572476  | missense | C | G | 0.131 | p.A1300G |
| 9612 | LTBP1      | 206943  | 2  | 33572490  | missense | G | T | 0.103 | p.V1305L |
| 9612 | EML6       | 1039753 | 2  | 55086815  | missense | G | A | 0.053 | p.G601D  |
| 9612 | INPP4A     | 4027    | 2  | 99181226  | missense | G | A | 0.135 | p.G684R  |
| 9612 | LRP2       | 4525    | 2  | 170025060 | missense | A | C | 0.197 | p.L3875R |
| 9612 | HIBCH      | 198047  | 2  | 191116997 | missense | G | A | 0.074 | p.P185L  |
| 9612 | AGAP1      | 1244888 | 2  | 236761414 | missense | C | G | 0.092 | p.P379A  |

|      |          |         |    |           |          |   |   |       |          |
|------|----------|---------|----|-----------|----------|---|---|-------|----------|
| 9612 | ZNF717   | 1290209 | 3  | 75787351  | missense | C | A | 0.156 | p.G425W  |
| 9612 | ZNF717   | 1290209 | 3  | 75788230  | missense | C | T | 0.117 | p.V132I  |
| 9612 | IGSF11   | 152538  | 3  | 118647457 | missense | T | A | 0.224 | p.N107I  |
| 9612 | KBTBD12  | 207335  | 3  | 127702942 | missense | C | T | 0.172 | p.R565C  |
| 9612 | GPR125   | 145290  | 4  | 22390385  | missense | A | T | 0.277 | p.I970K  |
| 9612 | LRRC66   | 1024611 | 4  | 52861083  | missense | T | G | 0.213 | p.D702A  |
| 9612 | DSPP     | 14208   | 4  | 88537243  | missense | C | A | 0.210 | p.D1143E |
| 9612 | TET2     | 1127208 | 4  | 106180868 | missense | A | C | 0.139 | p.K1299T |
| 9612 | FREM3    | 1168235 | 4  | 144619831 | missense | T | G | 0.156 | p.Q666H  |
| 9612 | ASIC5    | 17419   | 4  | 156757897 | missense | A | T | 0.172 | p.S393R  |
| 9612 | C6       | 1115131 | 5  | 41143055  | missense | T | G | 0.238 | p.N893H  |
| 9612 | ARAP3    | 22481   | 5  | 141059217 | missense | A | G | 0.202 | p.I198T  |
| 9612 | ZDHHC2   | 16353   | 8  | 17055093  | missense | A | G | 0.200 | p.I126V  |
| 9612 | FOCAD    | 17794   | 9  | 20944649  | missense | G | C | 0.286 | p.G1144A |
| 9612 | KLF9     | 1206    | 9  | 73027931  | missense | G | A | 0.210 | p.P117S  |
| 9612 | NTRK2    | 6180    | 9  | 87549127  | missense | G | A | 0.147 | p.E562K  |
| 9612 | PANX3    | 52959   | 11 | 124481460 | missense | T | G | 0.216 | p.L3R    |
| 9612 | PTPRO    | 30667   | 12 | 15637067  | missense | C | T | 0.062 | p.P79S   |
| 9612 | CTDSP2   | 5730    | 12 | 58217763  | missense | C | T | 0.243 | p.R205H  |
| 9612 | CTDSP2   | 5730    | 12 | 58220811  | missense | G | T | 0.088 | p.L108I  |
| 9612 | CTDSP2   | 5730    | 12 | 58220819  | missense | A | G | 0.096 | p.V105A  |
| 9612 | MEDAG    | 32849   | 13 | 31480705  | missense | C | T | 0.217 | p.S18L   |
| 9612 | PCDH9    | 203487  | 13 | 67205347  | missense | T | C | 0.317 | p.N1112S |
| 9612 | EDNRB    | 3991    | 13 | 78492693  | missense | T | G | 0.218 | p.S96R   |
| 9612 | OR4M1    | 1005500 | 14 | 20248876  | missense | A | G | 0.218 | p.Y132C  |
| 9612 | TMEM55B  | 144568  | 14 | 20929400  | missense | C | T | 0.316 | p.G29R   |
| 9612 | NYNRIN   | 25081   | 14 | 24886260  | missense | A | G | 0.168 | p.T1769A |
| 9612 | WDR89    | 80666   | 14 | 64066326  | missense | C | T | 0.069 | p.G112D  |
| 9612 | WDR89    | 80666   | 14 | 64066352  | missense | T | A | 0.074 | p.R103S  |
| 9612 | WDR89    | 80666   | 14 | 64066367  | missense | A | T | 0.100 | p.D98E   |
| 9612 | MED6     | 5466    | 14 | 71059660  | missense | A | G | 0.263 | p.S135P  |
| 9612 | CATSPERB | 24764   | 14 | 92136213  | missense | G | T | 0.070 | p.P411H  |
| 9612 | ADAM10   | 1110    | 15 | 58889762  | missense | C | T | 0.231 | p.G744E  |
| 9612 | PGPEPIL  | 1102612 | 15 | 99514279  | missense | C | T | 0.217 | p.D44N   |
| 9612 | NKD1     | 33119   | 16 | 50659487  | missense | G | A | 0.100 | p.R153Q  |
| 9612 | HYDIN    | 1270974 | 16 | 70902609  | missense | C | G | 0.160 | p.R3725P |
| 9612 | KLHDC4   | 17566   | 16 | 87799495  | missense | A | T | 0.075 | p.M1K    |
| 9612 | ALOX12B  | 1139    | 17 | 7989458   | missense | G | T | 0.192 | p.F76L   |
| 9612 | RAI1     | 30665   | 17 | 17697096  | missense | G | C | 0.085 | p.Q278H  |
| 9612 | FNDC8    | 17559   | 17 | 33448770  | missense | G | C | 0.239 | p.E20Q   |
| 9612 | STAT3    | 213662  | 17 | 40475070  | missense | T | G | 0.158 | p.S614R  |
| 9612 | PIEZO2   | 22068   | 18 | 10762939  | missense | A | G | 0.240 | p.F1010S |
| 9612 | NDUFA7   | 5001    | 19 | 8381467   | missense | C | T | 0.224 | p.C55Y   |
| 9612 | CYP2F1   | 774     | 19 | 41622481  | missense | G | A | 0.222 | p.R98H   |
| 9612 | PEG3     | 6210    | 19 | 57326252  | missense | T | G | 0.159 | p.E1186D |
| 9612 | KIF16B   | 24704   | 20 | 16493499  | missense | C | A | 0.207 | p.D140Y  |
| 9612 | CFAP61   | 15585   | 20 | 20209013  | missense | G | T | 0.130 | p.V685L  |
| 9612 | COL6A2   | 58175   | 21 | 47532060  | missense | C | T | 0.198 | p.R95C   |
| 9613 | RLF      | 12421   | 1  | 40702415  | missense | G | A | 0.089 | p.V681M  |
| 9613 | SLC5A9   | 1135181 | 1  | 48697295  | missense | T | C | 0.111 | p.L255P  |
| 9613 | HMCN1    | 31935   | 1  | 186047301 | missense | G | C | 0.114 | p.A2850P |
| 9613 | RND3     | 5168    | 2  | 151326571 | missense | C | A | 0.078 | p.S222I  |
| 9613 | ZNF717   | 1290209 | 3  | 75787351  | missense | C | A | 0.106 | p.G425W  |
| 9613 | DSPP     | 14208   | 4  | 88537243  | missense | C | A | 0.250 | p.D1143E |
| 9613 | ATOH1    | 5172    | 4  | 94751107  | missense | C | T | 0.086 | p.H344Y  |
| 9613 | FREM3    | 1168235 | 4  | 144621404 | missense | T | A | 0.058 | p.Q142L  |
| 9613 | ARRDC3   | 20801   | 5  | 90678707  | missense | T | A | 0.060 | p.N68I   |
| 9613 | PCDHA11  | 31861   | 5  | 140249929 | missense | G | C | 0.063 | p.R414P  |
| 9613 | BCKDHB   | 183050  | 6  | 80878682  | missense | G | A | 0.114 | p.G190S  |
| 9613 | OR2F1    | 12369   | 7  | 143657490 | missense | A | G | 0.067 | p.R143G  |
| 9613 | AGPAT5   | 18361   | 8  | 6612599   | missense | T | C | 0.103 | p.I258T  |
| 9613 | SLCO1C1  | 17435   | 12 | 20868184  | missense | A | T | 0.085 | p.D214V  |
| 9613 | CTDSP2   | 5730    | 12 | 58217763  | missense | C | T | 0.307 | p.R205H  |
| 9613 | CTDSP2   | 5730    | 12 | 58217770  | missense | G | C | 0.065 | p.L203V  |
| 9613 | CTDSP2   | 5730    | 12 | 58220811  | missense | G | T | 0.081 | p.L108I  |
| 9613 | CTDSP2   | 5730    | 12 | 58220831  | missense | C | A | 0.069 | p.R101M  |
| 9613 | CTDSP2   | 5730    | 12 | 58240184  | missense | C | A | 0.060 | p.R12M   |
| 9613 | CTDSP2   | 5730    | 12 | 58240188  | missense | G | A | 0.182 | p.R11W   |
| 9613 | METTL21C | 1010977 | 13 | 103339328 | missense | G | A | 0.074 | p.A121V  |
| 9613 | MAP1A    | 2373    | 15 | 43817807  | missense | T | A | 0.083 | p.V1379E |
| 9613 | LDHAL6B  | 33195   | 15 | 59500155  | missense | G | A | 0.077 | p.S339N  |
| 9613 | CHITA    | 1286402 | 16 | 11001949  | missense | G | A | 0.050 | p.G868D  |
| 9613 | NAE1     | 3905    | 16 | 66844662  | missense | C | A | 0.067 | p.A344S  |
| 9613 | HPR      | 20995   | 16 | 72110615  | missense | C | G | 0.052 | p.Q228E  |
| 9613 | CDH13    | 1257    | 16 | 83159087  | missense | T | A | 0.078 | p.F202Y  |
| 9613 | ABR      | 21962   | 17 | 959322    | missense | A | G | 0.103 | p.F505S  |
| 9613 | MRC2     | 6039    | 17 | 60757217  | missense | G | T | 0.105 | p.R751L  |
| 9613 | CTDPI    | 48368   | 18 | 77475372  | missense | G | A | 0.053 | p.A638T  |
| 9613 | LILRA2   | 6866    | 19 | 55087544  | missense | T | A | 0.148 | p.L408H  |
| 9613 | LILRA2   | 6866    | 19 | 55098686  | missense | C | A | 0.093 | p.P425H  |
| 9614 | CYP4XI   | 178033  | 1  | 47501792  | missense | C | T | 0.268 | p.P242S  |

|      |                 |         |    |           |          |   |   |       |          |
|------|-----------------|---------|----|-----------|----------|---|---|-------|----------|
| 9614 | <i>ABCB11</i>   | 3742    | 2  | 169783865 | missense | T | A | 0.124 | p.D1140V |
| 9614 | <i>ZNF717</i>   | 1290209 | 3  | 75787351  | missense | C | A | 0.163 | p.G425W  |
| 9614 | <i>ZNF717</i>   | 1290209 | 3  | 75788230  | missense | C | T | 0.141 | p.V132I  |
| 9614 | <i>DSPP</i>     | 14208   | 4  | 88537243  | missense | C | A | 0.211 | p.D1143E |
| 9614 | <i>GUCY1B3</i>  | 1291954 | 4  | 156696196 | missense | G | A | 0.083 | p.V32I   |
| 9614 | <i>GABRB2</i>   | 21911   | 5  | 160757996 | missense | G | A | 0.074 | p.A324V  |
| 9614 | <i>RIPPLY2</i>  | 1009994 | 6  | 84567052  | missense | T | C | 0.150 | p.F111L  |
| 9614 | <i>KIAA1147</i> | 1080392 | 7  | 141362499 | missense | C | T | 0.052 | p.G442D  |
| 9614 | <i>ATAD2</i>    | 14109   | 8  | 124382170 | missense | A | T | 0.174 | p.D274E  |
| 9614 | <i>EPPK1</i>    | 31308   | 8  | 144942798 | missense | T | C | 0.259 | p.K1542E |
| 9614 | <i>SORL1</i>    | 3105    | 11 | 121430309 | missense | G | A | 0.222 | p.A998T  |
| 9614 | <i>OR10G9</i>   | 1001953 | 11 | 123894452 | missense | A | G | 0.313 | p.I245V  |
| 9614 | <i>PLEKHG6</i>  | 18173   | 12 | 6436949   | missense | C | T | 0.067 | p.R734W  |
| 9614 | <i>CTDSP2</i>   | 5730    | 12 | 58217763  | missense | C | T | 0.191 | p.R205H  |
| 9614 | <i>CTDSP2</i>   | 5730    | 12 | 58217770  | missense | G | C | 0.055 | p.L203V  |
| 9614 | <i>CTDSP2</i>   | 5730    | 12 | 58220811  | missense | G | T | 0.118 | p.L108I  |
| 9614 | <i>CTDSP2</i>   | 5730    | 12 | 58220831  | missense | C | G | 0.129 | p.R101T  |
| 9614 | <i>CTDSP2</i>   | 5730    | 12 | 58240188  | missense | G | A | 0.091 | p.R11W   |
| 9614 | <i>DCLK1</i>    | 4734    | 13 | 36686082  | missense | A | G | 0.053 | p.V216A  |
| 9614 | <i>WDR89</i>    | 80666   | 14 | 64066398  | missense | G | C | 0.056 | p.A88G   |
| 9614 | <i>MARK3</i>    | 2376    | 14 | 103931953 | missense | C | A | 0.129 | p.S200R  |
| 9614 | <i>MAPIA</i>    | 2373    | 15 | 43814600  | missense | C | T | 0.119 | p.P310L  |
| 9614 | <i>PPM1E</i>    | 14906   | 17 | 56833485  | missense | C | T | 0.092 | p.P43S   |
| 9614 | <i>ACTG1</i>    | 1614    | 17 | 79478592  | missense | G | A | 0.077 | p.L142F  |
| 9614 | <i>CDH20</i>    | 31891   | 18 | 59221783  | missense | G | A | 0.068 | p.G754D  |
| 9614 | <i>CI9orf71</i> | 1135580 | 19 | 3539176   | missense | A | G | 0.200 | p.M1V    |
| 9614 | <i>LPAR2</i>    | 4720    | 19 | 19737507  | missense | G | A | 0.059 | p.S196L  |
| 9614 | <i>FTL</i>      | 146     | 19 | 49469580  | missense | A | G | 0.057 | p.K98E   |
| 9614 | <i>FTL</i>      | 146     | 19 | 49469589  | missense | A | T | 0.053 | p.M101L  |
| 9614 | <i>FTL</i>      | 146     | 19 | 49469595  | missense | C | A | 0.052 | p.L103M  |
| 9614 | <i>SEC23B</i>   | 32986   | 20 | 18507131  | missense | G | T | 0.063 | p.D317Y  |
| 9614 | <i>ZNF831</i>   | 178457  | 20 | 57766922  | missense | C | T | 0.053 | p.A283V  |
| 9615 | <i>KIF2C</i>    | 6845    | 1  | 45220458  | stopgain | C | T | 0.167 | p.R234X  |
| 9615 | <i>TMCC1</i>    | 1017395 | 3  | 129546966 | stopgain | G | A | 0.268 | p.Q86X   |
| 9615 | <i>WRN</i>      | 553     | 8  | 30989939  | stopgain | C | T | 0.174 | p.Q962X  |
| 9615 | <i>BAI1</i>     | 1702    | 8  | 143618420 | stopgain | C | T | 0.215 | p.Q1215X |
| 9615 | <i>LAMA1</i>    | 5559    | 18 | 6986307   | stopgain | G | T | 0.193 | p.Y1736X |
| 9615 | <i>CLCN6</i>    | 1286    | 1  | 11897075  | missense | G | A | 0.212 | p.R667Q  |
| 9615 | <i>ATP1A2</i>   | 702     | 1  | 160093100 | missense | G | A | 0.169 | p.R92H   |
| 9615 | <i>CD34</i>     | 1773    | 1  | 208062143 | missense | A | G | 0.154 | p.Y286H  |
| 9615 | <i>MTR</i>      | 1291940 | 1  | 236998982 | missense | G | A | 0.167 | p.A442T  |
| 9615 | <i>DNAH6</i>    | 1370    | 2  | 84816032  | missense | T | A | 0.210 | p.L855H  |
| 9615 | <i>IRS1</i>     | 5544    | 2  | 227661545 | missense | G | A | 0.216 | p.P637L  |
| 9615 | <i>CRBN</i>     | 16302   | 3  | 3195675   | missense | C | T | 0.103 | p.R307Q  |
| 9615 | <i>SEC13</i>    | 183352  | 3  | 10354412  | missense | T | C | 0.292 | p.H59R   |
| 9615 | <i>HLA-DQB2</i> | 1300790 | 6  | 32725636  | missense | C | T | 0.130 | p.S224N  |
| 9615 | <i>PKHD1</i>    | 170724  | 6  | 51612720  | missense | C | A | 0.090 | p.A3232S |
| 9615 | <i>COL19A1</i>  | 1858    | 6  | 70639488  | missense | G | T | 0.133 | p.D188Y  |
| 9615 | <i>SYNJ2</i>    | 3898    | 6  | 158492695 | missense | G | A | 0.150 | p.V668I  |
| 9615 | <i>PDE1C</i>    | 1191058 | 7  | 32338305  | missense | G | A | 0.167 | p.R15W   |
| 9615 | <i>PCLO</i>     | 33026   | 7  | 82545073  | missense | C | T | 0.253 | p.D4077N |
| 9615 | <i>SLC4A2</i>   | 3040    | 7  | 150761383 | missense | A | G | 0.065 | p.E49G   |
| 9615 | <i>CSPP1</i>    | 24790   | 8  | 68044256  | missense | G | A | 0.258 | p.D585N  |
| 9615 | <i>CDH17</i>    | 4063    | 8  | 95174361  | missense | T | C | 0.250 | p.N438D  |
| 9615 | <i>ALAD</i>     | 31      | 9  | 116153185 | missense | T | G | 0.233 | p.E97A   |
| 9615 | <i>NOTCH1</i>   | 17617   | 9  | 139396812 | missense | G | C | 0.167 | p.Q1766E |
| 9615 | <i>ITIH2</i>    | 2216    | 10 | 7765454   | missense | A | G | 0.252 | p.N303S  |
| 9615 | <i>FAM171A1</i> | 1010924 | 10 | 15262957  | missense | G | A | 0.233 | p.S286F  |
| 9615 | <i>POLR3A</i>   | 7055    | 10 | 79769340  | missense | T | C | 0.241 | p.K622E  |
| 9615 | <i>AHNAK</i>    | 1620    | 11 | 62286593  | missense | G | A | 0.270 | p.S5099L |
| 9615 | <i>PGR</i>      | 926     | 11 | 100999399 | missense | C | T | 0.196 | p.E135K  |
| 9615 | <i>BACE1</i>    | 138973  | 11 | 117160302 | missense | C | T | 0.158 | p.D427N  |
| 9615 | <i>FGF23</i>    | 20638   | 12 | 4479739   | missense | G | A | 0.214 | p.R176W  |
| 9615 | <i>CTDSP2</i>   | 5730    | 12 | 58217763  | missense | C | T | 0.191 | p.R205H  |
| 9615 | <i>CTDSP2</i>   | 5730    | 12 | 58217770  | missense | G | C | 0.083 | p.L203V  |
| 9615 | <i>CTDSP2</i>   | 5730    | 12 | 58220811  | missense | G | T | 0.112 | p.L108I  |
| 9615 | <i>CTDSP2</i>   | 5730    | 12 | 58220831  | missense | C | G | 0.077 | p.R101T  |
| 9615 | <i>KERA</i>     | 7035    | 12 | 91445263  | missense | A | G | 0.170 | p.S307P  |
| 9615 | <i>STAB2</i>    | 17564   | 12 | 104083731 | missense | G | T | 0.140 | p.L1051F |
| 9615 | <i>SLC8B1</i>   | 24959   | 12 | 113758421 | missense | G | A | 0.143 | p.P164L  |
| 9615 | <i>FOXP1</i>    | 5249    | 14 | 29237904  | missense | T | G | 0.232 | p.D473E  |
| 9615 | <i>WDR89</i>    | 80666   | 14 | 64066395  | missense | C | T | 0.071 | p.C89Y   |
| 9615 | <i>WDR89</i>    | 80666   | 14 | 64066398  | missense | G | C | 0.068 | p.A88G   |
| 9615 | <i>WDR89</i>    | 80666   | 14 | 64066402  | missense | A | G | 0.067 | p.S87P   |
| 9615 | <i>STARD9</i>   | 20759   | 15 | 42976420  | missense | T | A | 0.180 | p.S882T  |
| 9615 | <i>RASGRF1</i>  | 2891    | 15 | 79320181  | missense | C | T | 0.172 | p.S428N  |
| 9615 | <i>RASGRF1</i>  | 2891    | 15 | 79382825  | missense | G | A | 0.118 | p.R6W    |
| 9615 | <i>ALPK3</i>    | 20778   | 15 | 85399839  | missense | G | A | 0.230 | p.G826R  |
| 9615 | <i>OR4F6</i>    | 1005326 | 15 | 102346311 | missense | T | C | 0.222 | p.L130P  |
| 9615 | <i>GPR139</i>   | 1002911 | 16 | 20043121  | missense | T | C | 0.197 | p.H333R  |
| 9615 | <i>PLCG2</i>    | 2661    | 16 | 81973601  | missense | G | T | 0.143 | p.D1140Y |



|      |                 |         |    |           |          |   |   |       |          |
|------|-----------------|---------|----|-----------|----------|---|---|-------|----------|
| 9615 | <i>TRIM47</i>   | 33452   | 17 | 73874427  | missense | C | T | 0.063 | p.R68H   |
| 9615 | <i>LAMA1</i>    | 5559    | 18 | 6986306   | missense | G | T | 0.190 | p.Q1737K |
| 9615 | <i>CDH7</i>     | 33646   | 18 | 63481721  | missense | G | A | 0.308 | p.G169E  |
| 9615 | <i>RFX1</i>     | 2918    | 19 | 14076560  | missense | T | C | 0.141 | p.K664R  |
| 9615 | <i>URI1</i>     | 3796    | 19 | 30496287  | missense | T | A | 0.182 | p.D129E  |
| 9615 | <i>ZNF71</i>    | 21216   | 19 | 57133590  | missense | C | T | 0.219 | p.S312L  |
| 9615 | <i>SLC17A9</i>  | 22082   | 20 | 61593978  | missense | C | T | 0.121 | p.T167M  |
| 9615 | <i>USP16</i>    | 6447    | 21 | 30419532  | missense | A | G | 0.191 | p.Q634R  |
| 9615 | <i>ETS2</i>     | 5239    | 21 | 40186798  | missense | G | A | 0.209 | p.G273D  |
| 9618 | <i>ANO7</i>     | 1001891 | 2  | 242142814 | stopgain | C | T | 0.286 | p.Q318X  |
| 9618 | <i>FIP1L1</i>   | 30917   | 4  | 54324899  | stopgain | C | T | 0.172 | p.R527X  |
| 9618 | <i>HIVEP1</i>   | 2114    | 6  | 12124241  | stopgain | C | T | 0.149 | p.Q1405X |
| 9618 | <i>COL12A1</i>  | 4370    | 6  | 75893732  | stopgain | G | A | 0.093 | p.R376X  |
| 9618 | <i>MUC16</i>    | 24690   | 19 | 9085862   | stopgain | G | A | 0.096 | p.Q1985X |
| 9618 | <i>ARHGAP30</i> | 181720  | 1  | 161018818 | missense | G | A | 0.107 | p.P665S  |
| 9618 | <i>SNAP47</i>   | 53052   | 1  | 227947179 | missense | G | T | 0.078 | p.W372C  |
| 9618 | <i>GRB14</i>    | 4490    | 2  | 165378509 | missense | G | T | 0.190 | p.S266Y  |
| 9618 | <i>FSIP2</i>    | 173651  | 2  | 186654495 | missense | G | A | 0.172 | p.D967N  |
| 9618 | <i>HIBCH</i>    | 14362   | 2  | 191073636 | missense | C | G | 0.108 | p.G339R  |
| 9618 | <i>MOGAT1</i>   | 58165   | 2  | 223554125 | missense | T | C | 0.154 | p.Y139H  |
| 9618 | <i>IRS1</i>     | 5544    | 2  | 227660523 | missense | G | A | 0.114 | p.P978S  |
| 9618 | <i>GIGYF2</i>   | 15575   | 2  | 233712247 | missense | C | A | 0.172 | p.P1217Q |
| 9618 | <i>IL17RD</i>   | 17563   | 3  | 57140150  | missense | C | T | 0.108 | p.A195T  |
| 9618 | <i>NLGN1</i>    | 14932   | 3  | 173998281 | missense | C | A | 0.123 | p.Q554K  |
| 9618 | <i>GPRIN1</i>   | 52899   | 5  | 176026168 | missense | C | T | 0.148 | p.S223N  |
| 9618 | <i>OR2V1</i>    | 1258283 | 5  | 180551620 | missense | T | A | 0.286 | p.I229L  |
| 9618 | <i>CD2AP</i>    | 12120   | 6  | 47512380  | missense | A | G | 0.220 | p.I120V  |
| 9618 | <i>DST</i>      | 1723    | 6  | 56482074  | missense | T | A | 0.167 | p.K2064M |
| 9618 | <i>HGF</i>      | 1010932 | 7  | 81334821  | missense | G | T | 0.267 | p.A627E  |
| 9618 | <i>KEL</i>      | 420     | 7  | 142638479 | missense | G | A | 0.138 | p.P687S  |
| 9618 | <i>ZNF425</i>   | 1001661 | 7  | 148802431 | missense | G | A | 0.169 | p.P178S  |
| 9618 | <i>FOXB2</i>    | 1013735 | 9  | 79635099  | missense | G | A | 0.286 | p.V177I  |
| 9618 | <i>SKIDA1</i>   | 207371  | 10 | 21805466  | missense | C | T | 0.108 | p.G429E  |
| 9618 | <i>PSD</i>      | 2779    | 10 | 104165255 | missense | G | A | 0.059 | p.A346V  |
| 9618 | <i>NRAP</i>     | 198060  | 10 | 115383378 | missense | G | T | 0.077 | p.S789R  |
| 9618 | <i>SHANK2</i>   | 133266  | 11 | 70332367  | missense | G | C | 0.121 | p.S756W  |
| 9618 | <i>TEAD4</i>    | 201441  | 12 | 3120221   | missense | G | A | 0.167 | p.R93H   |
| 9618 | <i>SOAT2</i>    | 3578    | 12 | 53509227  | missense | C | T | 0.186 | p.A166V  |
| 9618 | <i>CTDSP2</i>   | 5730    | 12 | 58217763  | missense | C | T | 0.141 | p.R205H  |
| 9618 | <i>CTDSP2</i>   | 5730    | 12 | 58220801  | missense | G | T | 0.108 | p.T111N  |
| 9618 | <i>CTDSP2</i>   | 5730    | 12 | 58220811  | missense | G | T | 0.098 | p.L108I  |
| 9618 | <i>CTDSP2</i>   | 5730    | 12 | 58220831  | missense | C | A | 0.085 | p.R101M  |
| 9618 | <i>PABPC3</i>   | 30979   | 13 | 25670691  | missense | G | T | 0.053 | p.V119F  |
| 9618 | <i>WDR89</i>    | 80666   | 14 | 64066367  | missense | A | T | 0.056 | p.D98E   |
| 9618 | <i>WDR89</i>    | 80666   | 14 | 64066395  | missense | C | T | 0.062 | p.C89Y   |
| 9618 | <i>WDR89</i>    | 80666   | 14 | 64066398  | missense | G | C | 0.063 | p.A88G   |
| 9618 | <i>WDR89</i>    | 80666   | 14 | 64066402  | missense | A | G | 0.066 | p.S87P   |
| 9618 | <i>DENND4A</i>  | 5848    | 15 | 66023984  | missense | G | C | 0.175 | p.L388V  |
| 9618 | <i>LPCAT2</i>   | 17839   | 16 | 55616860  | missense | A | C | 0.098 | p.E495D  |
| 9618 | <i>COG8</i>     | 32382   | 16 | 69364935  | missense | T | C | 0.323 | p.Q549R  |
| 9618 | <i>COG8</i>     | 32382   | 16 | 69364936  | missense | G | T | 0.333 | p.Q549K  |
| 9618 | <i>TXNDC2</i>   | 32243   | 18 | 9887856   | missense | G | C | 0.345 | p.E393D  |
| 9618 | <i>ZNF516</i>   | 14643   | 18 | 74091345  | missense | T | A | 0.169 | p.R909W  |
| 9618 | <i>BTBD2</i>    | 17797   | 19 | 1993050   | missense | C | G | 0.250 | p.R218P  |
| 9618 | <i>CEACAM1</i>  | 1712    | 19 | 43025485  | missense | T | G | 0.054 | p.T298P  |
| 9618 | <i>SYT3</i>     | 32298   | 19 | 51132693  | missense | C | T | 0.200 | p.R380H  |
| 9618 | <i>FPR1</i>     | 2029    | 19 | 52249509  | missense | C | T | 0.163 | p.A247T  |
| 9618 | <i>LILRA2</i>   | 6866    | 19 | 55086368  | missense | T | G | 0.257 | p.W175G  |
| 9619 | <i>ZSCAN23</i>  | 1012455 | 6  | 28403264  | stopgain | G | A | 0.200 | p.R177X  |
| 9619 | <i>C8orf34</i>  | 52958   | 8  | 69243409  | stopgain | T | A | 0.231 | p.C54X   |
| 9619 | <i>ZNF471</i>   | 20813   | 19 | 57037019  | stopgain | C | A | 0.233 | p.S528X  |
| 9619 | <i>PTPRU</i>    | 133178  | 1  | 29602196  | missense | G | C | 0.279 | p.V461L  |
| 9619 | <i>SMAP2</i>    | 22733   | 1  | 40879856  | missense | T | A | 0.178 | p.L172Q  |
| 9619 | <i>WLS</i>      | 24911   | 1  | 68659655  | missense | T | C | 0.138 | p.K121R  |
| 9619 | <i>KIAA0040</i> | 14656   | 1  | 175129933 | missense | T | C | 0.182 | p.K73E   |
| 9619 | <i>IRF2BP2</i>  | 182972  | 1  | 234744394 | missense | T | C | 0.207 | p.S283G  |
| 9619 | <i>OR2T10</i>   | 1004693 | 1  | 248756263 | missense | C | A | 0.263 | p.E269D  |
| 9619 | <i>ABCB11</i>   | 3742    | 2  | 169850282 | missense | A | G | 0.244 | p.L241P  |
| 9619 | <i>FSIP2</i>    | 173651  | 2  | 186654216 | missense | G | A | 0.235 | p.D874N  |
| 9619 | <i>KIF1A</i>    | 4321    | 2  | 241658487 | missense | C | T | 0.093 | p.R1717Q |
| 9619 | <i>KIF1A</i>    | 4321    | 2  | 241682361 | missense | G | A | 0.051 | p.P1209S |
| 9619 | <i>KLF15</i>    | 14079   | 3  | 126071527 | missense | A | G | 0.265 | p.L80P   |
| 9619 | <i>PIK3R4</i>   | 14602   | 3  | 130424431 | missense | T | C | 0.250 | p.E969G  |
| 9619 | <i>WDFY3</i>    | 14991   | 4  | 85645657  | missense | C | T | 0.167 | p.A2455T |
| 9619 | <i>NR3C2</i>    | 1166104 | 4  | 149073762 | missense | A | C | 0.200 | p.F790V  |
| 9619 | <i>ELL2</i>     | 12081   | 5  | 95234393  | missense | G | A | 0.256 | p.S359F  |
| 9619 | <i>ZNF608</i>   | 20747   | 5  | 124080258 | missense | C | T | 0.288 | p.R142H  |
| 9619 | <i>GABRA1</i>   | 1127648 | 5  | 161324145 | missense | A | C | 0.143 | p.K363T  |
| 9619 | <i>CANX</i>     | 1746    | 5  | 179132839 | missense | C | T | 0.299 | p.P53S   |
| 9619 | <i>TBC1D7</i>   | 16495   | 6  | 13321292  | missense | C | G | 0.215 | p.V77L   |
| 9619 | <i>FAM8A1</i>   | 16255   | 6  | 17601040  | missense | G | A | 0.119 | p.G134S  |

|      |                   |         |    |           |          |   |   |       |          |
|------|-------------------|---------|----|-----------|----------|---|---|-------|----------|
| 9619 | <i>FAM8A1</i>     | 16255   | 6  | 17601041  | missense | G | T | 0.118 | p.G134V  |
| 9619 | <i>FAM8A1</i>     | 16255   | 6  | 17601044  | missense | T | C | 0.119 | p.L135P  |
| 9619 | <i>FAM8A1</i>     | 16255   | 6  | 17601058  | missense | G | A | 0.106 | p.A140T  |
| 9619 | <i>FAM8A1</i>     | 16255   | 6  | 17601086  | missense | A | G | 0.115 | p.Q149R  |
| 9619 | <i>FAM8A1</i>     | 16255   | 6  | 17601098  | missense | C | T | 0.066 | p.S153L  |
| 9619 | <i>HLA-DRB1</i>   | 2124    | 6  | 32551894  | missense | T | C | 0.196 | p.Q121R  |
| 9619 | <i>HLA-DQB1</i>   | 2123    | 6  | 32632769  | missense | T | C | 0.100 | p.Y62C   |
| 9619 | <i>HLA-DQA2</i>   | 20056   | 6  | 32713061  | missense | C | A | 0.064 | p.Q70K   |
| 9619 | <i>DSE</i>        | 13352   | 6  | 116752270 | missense | T | C | 0.259 | p.L275P  |
| 9619 | <i>GPRC6A</i>     | 148963  | 6  | 117128013 | missense | A | C | 0.061 | p.D285E  |
| 9619 | <i>OLIG3</i>      | 175747  | 6  | 137814785 | missense | C | T | 0.059 | p.A175T  |
| 9619 | <i>ELFN1</i>      | 1128636 | 7  | 1785134   | missense | C | T | 0.173 | p.T301M  |
| 9619 | <i>OTUD6B</i>     | 16023   | 8  | 92083488  | missense | C | A | 0.060 | p.Q99K   |
| 9619 | <i>ABCA2</i>      | 212533  | 9  | 139912294 | missense | G | C | 0.346 | p.S749C  |
| 9619 | <i>MLLT10</i>     | 4641    | 10 | 21903771  | missense | C | T | 0.063 | p.A174V  |
| 9619 | <i>HK1</i>        | 33500   | 10 | 71146097  | missense | A | G | 0.229 | p.T608A  |
| 9619 | <i>SLC17A6</i>    | 20346   | 11 | 22396364  | missense | A | G | 0.186 | p.I369V  |
| 9619 | <i>MUC15</i>      | 145650  | 11 | 26582672  | missense | T | G | 0.226 | p.E342D  |
| 9619 | <i>ORA15</i>      | 1005275 | 11 | 55136345  | missense | T | G | 0.241 | p.L329R  |
| 9619 | <i>C2CD3</i>      | 15531   | 11 | 73789391  | missense | C | T | 0.052 | p.V1458I |
| 9619 | <i>GDPD4</i>      | 182833  | 11 | 76969472  | missense | G | C | 0.156 | p.L275V  |
| 9619 | <i>KRT3</i>       | 57088   | 12 | 53189427  | missense | C | G | 0.222 | p.A134P  |
| 9619 | <i>CTDSP2</i>     | 5730    | 12 | 58217698  | missense | G | T | 0.068 | p.P227T  |
| 9619 | <i>CTDSP2</i>     | 5730    | 12 | 58217763  | missense | C | T | 0.252 | p.R205H  |
| 9619 | <i>CTDSP2</i>     | 5730    | 12 | 58220801  | missense | G | T | 0.074 | p.T111N  |
| 9619 | <i>CTDSP2</i>     | 5730    | 12 | 58220811  | missense | G | T | 0.108 | p.L108I  |
| 9619 | <i>CTDSP2</i>     | 5730    | 12 | 58220831  | missense | C | G | 0.074 | p.R101T  |
| 9619 | <i>TDG</i>        | 3211    | 12 | 104379429 | missense | A | G | 0.139 | p.Y338C  |
| 9619 | <i>CUX2</i>       | 15267   | 12 | 111731337 | missense | A | C | 0.265 | p.E175A  |
| 9619 | <i>ANAPC5</i>     | 16237   | 12 | 121790092 | missense | C | T | 0.227 | p.V18I   |
| 9619 | <i>FAM155A</i>    | 1080396 | 13 | 107823123 | missense | T | C | 0.185 | p.T367A  |
| 9619 | <i>HOMEZ</i>      | 20834   | 14 | 23746259  | missense | G | C | 0.225 | p.Q60E   |
| 9619 | <i>PPP4R4</i>     | 58237   | 14 | 94731783  | missense | G | A | 0.080 | p.G753R  |
| 9619 | <i>BMF</i>        | 33503   | 15 | 40396512  | missense | C | T | 0.060 | p.A108T  |
| 9619 | <i>FBXL16</i>     | 153350  | 16 | 744652    | missense | G | A | 0.075 | p.R425C  |
| 9619 | <i>SH2B1</i>      | 15503   | 16 | 28877657  | missense | C | T | 0.106 | p.A81V   |
| 9619 | <i>CYLD</i>       | 15247   | 16 | 50815165  | missense | G | C | 0.114 | p.E509D  |
| 9619 | <i>TEX14</i>      | 198393  | 17 | 56642297  | missense | T | C | 0.184 | p.S1373G |
| 9619 | <i>FHOD3</i>      | 25135   | 18 | 34182640  | missense | T | G | 0.345 | p.V241G  |
| 9619 | <i>MED16</i>      | 5481    | 19 | 868464    | missense | C | A | 0.253 | p.R812I  |
| 9619 | <i>ZNF625</i>     | 145233  | 19 | 12256410  | missense | G | A | 0.277 | p.P274L  |
| 9619 | <i>LEUTX</i>      | 1143832 | 19 | 40276562  | missense | C | A | 0.242 | p.S98R   |
| 9619 | <i>VRK3</i>       | 16440   | 19 | 50496118  | missense | T | A | 0.267 | p.Q321L  |
| 9619 | <i>MACROD2</i>    | 80676   | 20 | 13982967  | missense | G | A | 0.282 | p.R27H   |
| 9619 | <i>TPTE</i>       | 199261  | 21 | 10921938  | missense | G | A | 0.108 | p.A362V  |
| 9619 | <i>DDX53</i>      | 182699  | X  | 23019279  | missense | A | G | 0.200 | p.S369G  |
| 9619 | <i>FAM104B</i>    | 138362  | X  | 55172686  | missense | C | T | 0.143 | p.S60N   |
| 9619 | <i>FAM104B</i>    | 138362  | X  | 55172689  | missense | G | T | 0.150 | p.A59E   |
| 9619 | <i>TCEAL2</i>     | 80390   | X  | 101382112 | missense | G | A | 0.174 | p.G104R  |
| 9619 | <i>TCEAL2</i>     | 80390   | X  | 101382123 | missense | C | G | 0.239 | p.D107E  |
| 9619 | <i>TCEAL2</i>     | 80390   | X  | 101382148 | missense | G | A | 0.128 | p.G116R  |
| 9619 | <i>RBMXL3</i>     | 1145346 | X  | 114425181 | missense | A | G | 0.082 | p.R393G  |
| 9619 | <i>LICAM</i>      | 24003   | X  | 153135542 | missense | A | C | 0.175 | p.S320R  |
| 9627 | <i>CACHD1</i>     | 20925   | 1  | 65095158  | missense | G | A | 0.063 | p.R162H  |
| 9627 | <i>KCNN3</i>      | 2249    | 1  | 154842244 | missense | A | T | 0.067 | p.L66H   |
| 9627 | <i>INSRR</i>      | 14215   | 1  | 156821904 | missense | C | A | 0.066 | p.Q239H  |
| 9627 | <i>ZNF717</i>     | 1290209 | 3  | 75788230  | missense | C | T | 0.080 | p.V132I  |
| 9627 | <i>FAM8A1</i>     | 16255   | 6  | 17601058  | missense | G | A | 0.096 | p.A140T  |
| 9627 | <i>CD109</i>      | 133493  | 6  | 74472138  | missense | G | A | 0.182 | p.V264I  |
| 9627 | <i>SCAF11</i>     | 4719    | 12 | 46320488  | missense | T | C | 0.056 | p.E999G  |
| 9627 | <i>CTDSP2</i>     | 5730    | 12 | 58217763  | missense | C | T | 0.176 | p.R205H  |
| 9627 | <i>CTDSP2</i>     | 5730    | 12 | 58220801  | missense | G | T | 0.073 | p.T111N  |
| 9627 | <i>CTDSP2</i>     | 5730    | 12 | 58220811  | missense | G | T | 0.118 | p.L108I  |
| 9627 | <i>ZFYVE26</i>    | 15346   | 14 | 68264965  | missense | T | C | 0.058 | p.T672A  |
| 9627 | <i>APOBR</i>      | 18690   | 16 | 28507445  | missense | G | C | 0.175 | p.E361D  |
| 9627 | <i>APOBR</i>      | 18690   | 16 | 28507452  | missense | G | T | 0.171 | p.G364W  |
| 9627 | <i>BBS2</i>       | 31885   | 16 | 56533698  | missense | C | T | 0.063 | p.A507T  |
| 9627 | <i>HLF</i>        | 2126    | 17 | 53392602  | missense | G | A | 0.105 | p.A156T  |
| 9627 | <i>ST6GALNAC1</i> | 18414   | 17 | 74622824  | missense | C | A | 0.089 | p.R275L  |
| 9627 | <i>DDX39A</i>     | 5804    | 19 | 14521876  | missense | G | A | 0.050 | p.R180W  |
| 9627 | <i>ZNF569</i>     | 152484  | 19 | 37904580  | missense | G | T | 0.057 | p.A327E  |
| 9627 | <i>ARHGEF1</i>    | 199002  | 19 | 42396797  | missense | G | A | 0.087 | p.G179D  |
| 9627 | <i>FAM104B</i>    | 1166703 | X  | 55172521  | missense | G | T | 0.075 | p.T114K  |
| 9627 | <i>FAM104B</i>    | 138362  | X  | 55172686  | missense | C | T | 0.116 | p.S60N   |
| 9627 | <i>FAM104B</i>    | 138362  | X  | 55172689  | missense | G | T | 0.090 | p.A59E   |
| 9628 | <i>RELN</i>       | 173054  | 7  | 103557564 | stopgain | G | A | 0.075 | p.Q99X   |
| 9628 | <i>FOXD2</i>      | 4474    | 1  | 47905258  | missense | C | T | 0.089 | p.A484V  |
| 9628 | <i>GRHL1</i>      | 198182  | 2  | 10132228  | missense | T | C | 0.287 | p.L472P  |
| 9628 | <i>STRN</i>       | 3162    | 2  | 37129752  | missense | C | T | 0.069 | p.E212K  |
| 9628 | <i>LRP1B</i>      | 18557   | 2  | 141739826 | missense | G | C | 0.088 | p.D930E  |
| 9628 | <i>UPK1B</i>      | 6952    | 3  | 118905592 | missense | G | A | 0.052 | p.A2T    |

|      |                 |         |    |           |          |   |   |       |          |
|------|-----------------|---------|----|-----------|----------|---|---|-------|----------|
| 9628 | <i>SLIT2</i>    | 4787    | 4  | 20550747  | missense | T | G | 0.275 | p.L829V  |
| 9628 | <i>UNC5C</i>    | 3728    | 4  | 96163682  | missense | G | A | 0.202 | p.R336C  |
| 9628 | <i>SLIT3</i>    | 3062    | 5  | 168244436 | missense | C | A | 0.234 | p.C221F  |
| 9628 | <i>FAM8A1</i>   | 16255   | 6  | 17601098  | missense | C | T | 0.083 | p.S153L  |
| 9628 | <i>MUC22</i>    | 1198815 | 6  | 30996839  | missense | G | A | 0.082 | p.E1211K |
| 9628 | <i>HLA-DQB1</i> | 2123    | 6  | 32632769  | missense | T | C | 0.105 | p.Y62C   |
| 9628 | <i>HLA-DQA2</i> | 20056   | 6  | 32713061  | missense | C | A | 0.107 | p.Q70K   |
| 9628 | <i>SDK1</i>     | 152744  | 7  | 4172007   | missense | G | A | 0.250 | p.V1394M |
| 9628 | <i>ABCA13</i>   | 152701  | 7  | 48315342  | missense | A | G | 0.063 | p.M2027V |
| 9628 | <i>GATAD1</i>   | 21167   | 7  | 92077048  | missense | C | T | 0.227 | p.P2L    |
| 9628 | <i>POT1</i>     | 15450   | 7  | 124465335 | missense | T | C | 0.244 | p.D588G  |
| 9628 | <i>RNF32</i>    | 30936   | 7  | 156437439 | missense | C | A | 0.129 | p.P88T   |
| 9628 | <i>CSMD1</i>    | 33225   | 8  | 3253897   | missense | C | A | 0.189 | p.Q804H  |
| 9628 | <i>PRUNE2</i>   | 15225   | 9  | 79325973  | missense | G | A | 0.256 | p.P406L  |
| 9628 | <i>TMEM38B</i>  | 18112   | 9  | 108467901 | missense | A | T | 0.216 | p.N46Y   |
| 9628 | <i>IFIT5</i>    | 12420   | 10 | 91178194  | missense | G | A | 0.286 | p.R413H  |
| 9628 | <i>CTBP2</i>    | 22802   | 10 | 126692019 | missense | G | A | 0.222 | p.P34L   |
| 9628 | <i>MRGPRE</i>   | 1039165 | 11 | 3250020   | missense | G | A | 0.161 | p.P4S    |
| 9628 | <i>CTR9</i>     | 14633   | 11 | 10778364  | missense | C | T | 0.063 | p.R191C  |
| 9628 | <i>OR5D16</i>   | 1005496 | 11 | 55606357  | missense | A | G | 0.224 | p.N44D   |
| 9628 | <i>FAT3</i>     | 1008781 | 11 | 92616485  | missense | A | C | 0.065 | p.N4288T |
| 9628 | <i>LRP6</i>     | 2336    | 12 | 12311792  | missense | G | A | 0.250 | p.S921F  |
| 9628 | <i>KRT76</i>    | 15848   | 12 | 53170841  | missense | C | T | 0.056 | p.G79R   |
| 9628 | <i>CTDSP2</i>   | 5730    | 12 | 58217698  | missense | G | T | 0.069 | p.P227T  |
| 9628 | <i>CTDSP2</i>   | 5730    | 12 | 58217770  | missense | G | C | 0.056 | p.L203V  |
| 9628 | <i>CTDSP2</i>   | 5730    | 12 | 58220811  | missense | G | T | 0.112 | p.L108I  |
| 9628 | <i>CTDSP2</i>   | 5730    | 12 | 58220819  | missense | A | G | 0.121 | p.V105A  |
| 9628 | <i>CTDSP2</i>   | 5730    | 12 | 58220831  | missense | C | G | 0.072 | p.R101T  |
| 9628 | <i>CTDSP2</i>   | 5730    | 12 | 58240188  | missense | G | A | 0.104 | p.R11W   |
| 9628 | <i>TMEM132D</i> | 133448  | 12 | 129559442 | missense | T | C | 0.263 | p.T760A  |
| 9628 | <i>DNAAF1</i>   | 178452  | 16 | 84182738  | missense | G | A | 0.192 | p.R84Q   |
| 9628 | <i>C17orf49</i> | 174893  | 17 | 6919879   | missense | A | G | 0.228 | p.E95G   |
| 9628 | <i>GFAP</i>     | 2055    | 17 | 42989131  | missense | G | A | 0.258 | p.A272V  |
| 9628 | <i>BPTF</i>     | 182641  | 17 | 65908784  | missense | T | C | 0.254 | p.V1721A |
| 9628 | <i>RPTOR</i>    | 20761   | 17 | 78933959  | missense | G | T | 0.291 | p.D1187Y |
| 9628 | <i>CLPP</i>     | 6012    | 19 | 6361895   | missense | G | T | 0.083 | p.A72S   |
| 9628 | <i>COL6A1</i>   | 1848    | 21 | 47406559  | missense | G | A | 0.167 | p.G183D  |
| 9628 | <i>CPT1B</i>    | 152246  | 22 | 51015768  | missense | C | T | 0.278 | p.R89K   |
| 9628 | <i>HEPH</i>     | 138737  | X  | 65480080  | missense | C | A | 0.180 | p.L1113I |
| 9628 | <i>AR</i>       | 1011645 | X  | 66941771  | missense | C | A | 0.182 | p.F273L  |
| 9628 | <i>GPR112</i>   | 153834  | X  | 135431614 | missense | G | T | 0.229 | p.G1917W |
| 9628 | <i>GPR112</i>   | 153834  | X  | 135432373 | missense | A | G | 0.181 | p.I2170V |
| 9629 | <i>PBRM1</i>    | 18313   | 3  | 52598142  | stopgain | G | A | 0.121 | p.Q1242X |
| 9629 | <i>ZBTB20</i>   | 15642   | 3  | 114070039 | stopgain | G | A | 0.109 | p.Q223X  |
| 9629 | <i>NUP153</i>   | 5124    | 6  | 17661928  | stopgain | G | A | 0.051 | p.R451X  |
| 9629 | <i>ATG2B</i>    | 18036   | 14 | 96771988  | stopgain | C | T | 0.053 | p.W1557X |
| 9629 | <i>RPS6KA1</i>  | 2953    | 1  | 26887329  | missense | A | G | 0.250 | p.E443G  |
| 9629 | <i>ACKR1</i>    | 2036    | 1  | 159175522 | missense | T | A | 0.111 | p.V98D   |
| 9629 | <i>ITLN1</i>    | 17625   | 1  | 160851089 | missense | T | A | 0.073 | p.Y140F  |
| 9629 | <i>C4BPA</i>    | 715     | 1  | 207287489 | missense | G | A | 0.075 | p.D63N   |
| 9629 | <i>USH2A</i>    | 206933  | 1  | 215901673 | missense | G | A | 0.211 | p.A3922V |
| 9629 | <i>MAP10</i>    | 19090   | 1  | 232942128 | missense | A | C | 0.163 | p.Q453H  |
| 9629 | <i>CCDC142</i>  | 32779   | 2  | 74702216  | missense | T | A | 0.101 | p.Q601L  |
| 9629 | <i>LRP1B</i>    | 18557   | 2  | 141777603 | missense | G | A | 0.125 | p.H620Y  |
| 9629 | <i>FMNL2</i>    | 52905   | 2  | 153484907 | missense | C | T | 0.091 | p.R754W  |
| 9629 | <i>GIGYF2</i>   | 15575   | 2  | 233704620 | missense | C | T | 0.087 | p.T943M  |
| 9629 | <i>LHFPLA</i>   | 198560  | 3  | 9594093   | missense | C | T | 0.119 | p.A91T   |
| 9629 | <i>NCKIPSD</i>  | 184231  | 3  | 48716855  | missense | C | T | 0.064 | p.A502T  |
| 9629 | <i>ZNF717</i>   | 1290209 | 3  | 75788230  | missense | C | T | 0.202 | p.V132I  |
| 9629 | <i>OR5K4</i>    | 1005517 | 3  | 98073598  | missense | A | T | 0.167 | p.I301F  |
| 9629 | <i>TIMMDC1</i>  | 16589   | 3  | 119219609 | missense | G | A | 0.062 | p.G88S   |
| 9629 | <i>ENAM</i>     | 31889   | 4  | 71497439  | missense | A | G | 0.098 | p.N36S   |
| 9629 | <i>TET2</i>     | 1127208 | 4  | 106180899 | missense | T | A | 0.139 | p.F1309L |
| 9629 | <i>ARHGEF28</i> | 1244364 | 5  | 73207259  | missense | G | C | 0.147 | p.V1603L |
| 9629 | <i>VWA7</i>     | 25258   | 6  | 31743196  | missense | C | T | 0.118 | p.S175N  |
| 9629 | <i>HLA-DQA2</i> | 20056   | 6  | 32713061  | missense | C | A | 0.149 | p.Q70K   |
| 9629 | <i>ZNF292</i>   | 15021   | 6  | 87969625  | missense | A | C | 0.118 | p.K2093T |
| 9629 | <i>NDUF44</i>   | 2489    | 7  | 10979669  | missense | T | G | 0.082 | p.L6L    |
| 9629 | <i>MPLKIP</i>   | 138701  | 7  | 40173925  | missense | G | A | 0.074 | p.P81L   |
| 9629 | <i>PLOD3</i>    | 1084    | 7  | 100853439 | missense | A | G | 0.065 | p.W540R  |
| 9629 | <i>CHPF2</i>    | 19015   | 7  | 150932286 | missense | G | T | 0.156 | p.G131V  |
| 9629 | <i>C8orf22</i>  | 1256598 | 8  | 49986834  | missense | T | G | 0.085 | p.F59V   |
| 9629 | <i>KANK1</i>    | 153186  | 9  | 744533    | missense | A | G | 0.072 | p.K1314E |
| 9629 | <i>SPATA6L</i>  | 1039395 | 9  | 4661921   | missense | T | C | 0.200 | p.Q52R   |
| 9629 | <i>DOCK1</i>    | 1380    | 10 | 128840973 | missense | G | T | 0.110 | p.A678S  |
| 9629 | <i>OR51B2</i>   | 33180   | 11 | 5344887   | missense | A | T | 0.127 | p.F214Y  |
| 9629 | <i>CTR9</i>     | 14633   | 11 | 10772991  | missense | G | A | 0.118 | p.R11Q   |
| 9629 | <i>TPCN2</i>    | 139075  | 11 | 68848872  | missense | C | T | 0.078 | p.P532S  |
| 9629 | <i>USP35</i>    | 20798   | 11 | 77920646  | missense | G | A | 0.051 | p.C582Y  |
| 9629 | <i>TENM4</i>    | 1098816 | 11 | 78380720  | missense | G | A | 0.255 | p.H2224Y |
| 9629 | <i>TSPAN9</i>   | 6675    | 12 | 3389554   | missense | G | A | 0.143 | p.E113K  |

|      |                 |         |    |           |          |   |   |       |          |
|------|-----------------|---------|----|-----------|----------|---|---|-------|----------|
| 9629 | <i>PDZRN4</i>   | 13377   | 12 | 41900447  | missense | G | A | 0.149 | p.A345T  |
| 9629 | <i>CTDSP2</i>   | 5730    | 12 | 58217698  | missense | G | T | 0.059 | p.P227T  |
| 9629 | <i>CTDSP2</i>   | 5730    | 12 | 58220811  | missense | G | T | 0.082 | p.L108I  |
| 9629 | <i>CTDSP2</i>   | 5730    | 12 | 58220819  | missense | A | G | 0.146 | p.V105A  |
| 9629 | <i>CTDSP2</i>   | 5730    | 12 | 58220831  | missense | C | G | 0.087 | p.R101T  |
| 9629 | <i>CTDSP2</i>   | 5730    | 12 | 58240188  | missense | G | A | 0.160 | p.R11W   |
| 9629 | <i>MYH6</i>     | 2471    | 14 | 23857002  | missense | A | T | 0.174 | p.L1497Q |
| 9629 | <i>WDR89</i>    | 80666   | 14 | 64066352  | missense | T | A | 0.083 | p.R103S  |
| 9629 | <i>WDR89</i>    | 80666   | 14 | 64066367  | missense | A | T | 0.100 | p.D98E   |
| 9629 | <i>WDR89</i>    | 80666   | 14 | 64066395  | missense | C | T | 0.139 | p.C89Y   |
| 9629 | <i>WDR89</i>    | 80666   | 14 | 64066398  | missense | G | C | 0.153 | p.A88G   |
| 9629 | <i>WDR89</i>    | 80666   | 14 | 64066402  | missense | A | G | 0.137 | p.S87P   |
| 9629 | <i>IRF2BP1</i>  | 24496   | 14 | 77493537  | missense | G | A | 0.183 | p.P200L  |
| 9629 | <i>C16orf45</i> | 33201   | 16 | 15677089  | missense | C | A | 0.089 | p.P166T  |
| 9629 | <i>ADAMTS18</i> | 199355  | 16 | 77356283  | missense | T | C | 0.107 | p.T705A  |
| 9629 | <i>ZNF469</i>   | 1127464 | 16 | 88503683  | missense | G | A | 0.225 | p.E3241K |
| 9629 | <i>DNAH2</i>    | 20877   | 17 | 7682634   | missense | T | C | 0.093 | p.I1872T |
| 9629 | <i>KRTAP1-4</i> | 1257305 | 17 | 39186320  | missense | C | G | 0.122 | p.C4S    |
| 9629 | <i>TMEM104</i>  | 17728   | 17 | 72791154  | missense | G | A | 0.202 | p.G144E  |
| 9629 | <i>TMC8</i>     | 152468  | 17 | 76137024  | missense | C | T | 0.207 | p.P671L  |
| 9629 | <i>SLC7A9</i>   | 14270   | 19 | 33359437  | missense | C | T | 0.202 | p.G2R    |
| 9629 | <i>ZSCAN5B</i>  | 1080456 | 19 | 56704307  | missense | T | C | 0.052 | p.N39D   |
| 9629 | <i>RALGAP2</i>  | 20343   | 20 | 20475761  | missense | C | A | 0.066 | p.E1789D |
| 9629 | <i>NPEPL1</i>   | 24663   | 20 | 57276087  | missense | G | A | 0.055 | p.G184D  |
| 9629 | <i>NCAM2</i>    | 4540    | 21 | 22710835  | missense | C | G | 0.163 | p.T342R  |
| 9631 | <i>LIPT1</i>    | 145199  | 2  | 99779506  | stopgain | G | A | 0.227 | p.W362X  |
| 9631 | <i>COG3</i>     | 31431   | 13 | 46054378  | stopgain | A | T | 0.069 | p.K168X  |
| 9631 | <i>KCNJ12</i>   | 21012   | 17 | 21319092  | stopgain | C | A | 0.257 | p.Y146X  |
| 9631 | <i>RNF207</i>   | 207396  | 1  | 6266719   | missense | C | A | 0.053 | p.H42N   |
| 9631 | <i>KIAA1324</i> | 20775   | 1  | 109742751 | missense | C | G | 0.263 | p.T900S  |
| 9631 | <i>FMO3</i>     | 6894    | 1  | 171086491 | missense | G | A | 0.272 | p.G503E  |
| 9631 | <i>COBLL1</i>   | 14900   | 2  | 165548810 | missense | T | C | 0.224 | p.Q1179R |
| 9631 | <i>ROBO1</i>    | 133631  | 3  | 78680389  | missense | G | T | 0.281 | p.A1183E |
| 9631 | <i>GUCY1A3</i>  | 1256449 | 4  | 156634624 | missense | C | G | 0.209 | p.I487M  |
| 9631 | <i>HLA-DQB2</i> | 1300790 | 6  | 32725636  | missense | C | T | 0.145 | p.S224N  |
| 9631 | <i>FAM20C</i>   | 20223   | 7  | 298646    | missense | C | A | 0.089 | p.L494M  |
| 9631 | <i>MUC17</i>    | 1040105 | 7  | 100680057 | missense | C | G | 0.052 | p.T1787S |
| 9631 | <i>KMT2C</i>    | 170606  | 7  | 152027726 | missense | C | T | 0.082 | p.A117T  |
| 9631 | <i>KIAA1429</i> | 183009  | 8  | 95531549  | missense | T | C | 0.056 | p.E726G  |
| 9631 | <i>TRAPPC9</i>  | 31466   | 8  | 141460890 | missense | T | C | 0.080 | p.R293G  |
| 9631 | <i>SWI5</i>     | 1040011 | 9  | 131038437 | missense | G | A | 0.231 | p.G5S    |
| 9631 | <i>ANK3</i>     | 20987   | 10 | 61894096  | missense | A | G | 0.071 | p.L926S  |
| 9631 | <i>HPSE2</i>    | 21828   | 10 | 100503687 | missense | T | G | 0.250 | p.K246T  |
| 9631 | <i>CTBP2</i>    | 22802   | 10 | 126686646 | missense | C | G | 0.135 | p.W151S  |
| 9631 | <i>CTBP2</i>    | 22802   | 10 | 126686649 | missense | G | C | 0.128 | p.T150R  |
| 9631 | <i>CTBP2</i>    | 22802   | 10 | 126686656 | missense | T | C | 0.132 | p.R148G  |
| 9631 | <i>CTBP2</i>    | 22802   | 10 | 126686680 | missense | A | C | 0.116 | p.C140G  |
| 9631 | <i>SOX5</i>     | 178010  | 12 | 23687439  | missense | G | T | 0.281 | p.P656H  |
| 9631 | <i>CTDSP2</i>   | 5730    | 12 | 58217763  | missense | C | T | 0.197 | p.R205H  |
| 9631 | <i>CTDSP2</i>   | 5730    | 12 | 58217770  | missense | G | C | 0.059 | p.L203V  |
| 9631 | <i>CTDSP2</i>   | 5730    | 12 | 58220801  | missense | G | T | 0.057 | p.T111N  |
| 9631 | <i>CTDSP2</i>   | 5730    | 12 | 58220819  | missense | A | G | 0.070 | p.V105A  |
| 9631 | <i>CTDSP2</i>   | 5730    | 12 | 58240184  | missense | C | A | 0.071 | p.R12M   |
| 9631 | <i>CTDSP2</i>   | 5730    | 12 | 58240188  | missense | G | A | 0.123 | p.R11W   |
| 9631 | <i>NAV3</i>     | 14903   | 12 | 78444893  | missense | G | C | 0.267 | p.G828R  |
| 9631 | <i>HSP90B1</i>  | 3299    | 12 | 104341190 | missense | A | T | 0.077 | p.E788D  |
| 9631 | <i>MAB21L1</i>  | 5584    | 13 | 36050061  | missense | G | C | 0.248 | p.T72S   |
| 9631 | <i>UGGT2</i>    | 20121   | 13 | 96547442  | missense | G | T | 0.182 | p.N917K  |
| 9631 | <i>FBN1</i>     | 138     | 15 | 48762896  | missense | G | T | 0.277 | p.P1465H |
| 9631 | <i>FAM174B</i>  | 207446  | 15 | 93198688  | missense | A | C | 0.128 | p.S68A   |
| 9631 | <i>TUBB3</i>    | 6086    | 16 | 90001641  | missense | C | T | 0.080 | p.P261L  |
| 9631 | <i>RAI1</i>     | 30665   | 17 | 17697096  | missense | G | C | 0.054 | p.Q278H  |
| 9631 | <i>CDC27</i>    | 1293091 | 17 | 45229221  | missense | C | T | 0.200 | p.E341K  |
| 9631 | <i>CDC27</i>    | 1293091 | 17 | 45229228  | missense | A | C | 0.172 | p.N338K  |
| 9631 | <i>CDC27</i>    | 1293091 | 17 | 45229234  | missense | A | C | 0.147 | p.S336R  |
| 9631 | <i>FAM83E</i>   | 17708   | 19 | 49107038  | missense | G | T | 0.074 | p.Q297K  |
| 9631 | <i>ZNF577</i>   | 32679   | 19 | 52376946  | missense | C | A | 0.179 | p.Q99H   |
| 9631 | <i>PEG3</i>     | 6210    | 19 | 57327001  | missense | C | A | 0.292 | p.A937S  |
| 9631 | <i>MYL9</i>     | 181526  | 20 | 35177615  | missense | G | A | 0.051 | p.R161H  |
| 9631 | <i>TAF4</i>     | 3185    | 20 | 60573244  | missense | C | A | 0.062 | p.R973L  |
| 9631 | <i>GNAQ</i>     | 2072    | 9  | 80537112  | missense | T | A | 0.227 | p.T96S   |
| 9632 | <i>CCDC88A</i>  | 18084   | 2  | 55573427  | stopgain | G | A | 0.051 | p.R309X  |
| 9632 | <i>CCDC168</i>  | 1146197 | 13 | 103395635 | stopgain | A | T | 0.223 | p.L2471X |
| 9632 | <i>DHX34</i>    | 14681   | 19 | 47885359  | stopgain | C | T | 0.215 | p.Q1141X |
| 9632 | <i>LRRC7</i>    | 20794   | 1  | 70504563  | missense | C | T | 0.275 | p.P981L  |
| 9632 | <i>DDX20</i>    | 7204    | 1  | 112309408 | missense | T | G | 0.164 | p.Y788D  |
| 9632 | <i>POU2F1</i>   | 2697    | 1  | 167353121 | missense | C | T | 0.050 | p.T249M  |
| 9632 | <i>PAPPA2</i>   | 21936   | 1  | 176564431 | missense | G | T | 0.146 | p.S564I  |
| 9632 | <i>HMCN1</i>    | 31935   | 1  | 186135419 | missense | T | A | 0.163 | p.D5141E |
| 9632 | <i>BRINP3</i>   | 199051  | 1  | 190067855 | missense | G | A | 0.163 | p.R532W  |
| 9632 | <i>2-Mar</i>    | 17898   | 1  | 220935037 | missense | A | G | 0.125 | p.N162D  |

|      |                 |         |    |           |          |   |   |       |          |
|------|-----------------|---------|----|-----------|----------|---|---|-------|----------|
| 9632 | <i>RBMS1</i>    | 16836   | 2  | 161141342 | missense | T | A | 0.247 | p.M282L  |
| 9632 | <i>SCN1A</i>    | 6920    | 2  | 166848587 | missense | A | C | 0.246 | p.I1733S |
| 9632 | <i>ANKMY1</i>   | 16552   | 2  | 241451318 | missense | G | T | 0.269 | p.T749K  |
| 9632 | <i>SUMF1</i>    | 182760  | 3  | 4459758   | missense | C | T | 0.179 | p.A221T  |
| 9632 | <i>ROBO2</i>    | 2942    | 3  | 77147256  | missense | C | A | 0.195 | p.N51K   |
| 9632 | <i>EPHA3</i>    | 5233    | 3  | 89478256  | missense | G | A | 0.087 | p.S692N  |
| 9632 | <i>ZNF718</i>   | 182524  | 4  | 59387     | missense | C | G | 0.127 | p.P23R   |
| 9632 | <i>DSPP</i>     | 14208   | 4  | 88537243  | missense | C | A | 0.163 | p.D1143E |
| 9632 | <i>MAB21L2</i>  | 6439    | 4  | 151504662 | missense | C | T | 0.209 | p.R161C  |
| 9632 | <i>FAM149A</i>  | 15398   | 4  | 187075716 | missense | C | T | 0.053 | p.R103C  |
| 9632 | <i>CCNO</i>     | 21147   | 5  | 54527321  | missense | G | A | 0.239 | p.A312V  |
| 9632 | <i>MAST4</i>    | 15183   | 5  | 66462811  | missense | G | T | 0.274 | p.D2602Y |
| 9632 | <i>IL5</i>      | 879     | 5  | 131879143 | missense | G | C | 0.208 | p.L10V   |
| 9632 | <i>HMGXB3</i>   | 14983   | 5  | 149431670 | missense | C | T | 0.211 | p.T1265I |
| 9632 | <i>FAM8A1</i>   | 16255   | 6  | 17601058  | missense | G | A | 0.089 | p.A140T  |
| 9632 | <i>MUC22</i>    | 1198815 | 6  | 30995478  | missense | C | A | 0.109 | p.T757K  |
| 9632 | <i>HLA-DQA2</i> | 20056   | 6  | 32713076  | missense | A | C | 0.092 | p.S75R   |
| 9632 | <i>HLA-DQA2</i> | 20056   | 6  | 32713080  | missense | A | G | 0.094 | p.K76R   |
| 9632 | <i>HLA-DQA2</i> | 20056   | 6  | 32713090  | missense | T | A | 0.088 | p.S79R   |
| 9632 | <i>ITPR3</i>    | 2224    | 6  | 33651107  | missense | G | A | 0.050 | p.R1574Q |
| 9632 | <i>RIMS1</i>    | 14989   | 6  | 73100335  | missense | A | G | 0.151 | p.R1468G |
| 9632 | <i>ZNF804B</i>  | 181646  | 7  | 88965990  | missense | A | G | 0.235 | p.I1232V |
| 9632 | <i>LOC93432</i> | 1293626 | 7  | 141920342 | missense | G | A | 0.073 | p.A2011T |
| 9632 | <i>LOC93432</i> | 1293626 | 7  | 141920414 | missense | G | A | 0.173 | p.G2035S |
| 9632 | <i>ESYT2</i>    | 20728   | 7  | 158552795 | missense | C | A | 0.059 | p.R474I  |
| 9632 | <i>DLC1</i>     | 182643  | 8  | 12957705  | missense | A | G | 0.145 | p.V714A  |
| 9632 | <i>MFSD3</i>    | 138431  | 8  | 145735371 | missense | G | A | 0.063 | p.A219T  |
| 9632 | <i>SLC46A2</i>  | 33051   | 9  | 115652523 | missense | C | T | 0.127 | p.G147S  |
| 9632 | <i>TTC16</i>    | 144965  | 9  | 130489280 | missense | G | A | 0.074 | p.G486D  |
| 9632 | <i>ABCA2</i>    | 212533  | 9  | 139907001 | missense | G | A | 0.258 | p.P1738L |
| 9632 | <i>OR13A1</i>   | 1004297 | 10 | 45799171  | missense | C | T | 0.262 | p.A234T  |
| 9632 | <i>SH3PXD2A</i> | 14631   | 10 | 105362982 | missense | A | T | 0.191 | p.S637T  |
| 9632 | <i>FOLH1</i>    | 4476    | 11 | 49170265  | missense | C | G | 0.250 | p.M648I  |
| 9632 | <i>TBX10</i>    | 5995    | 11 | 67400493  | missense | C | A | 0.188 | p.A211S  |
| 9632 | <i>USP35</i>    | 20798   | 11 | 77921717  | missense | G | T | 0.088 | p.R939I  |
| 9632 | <i>SCNN1A</i>   | 1159576 | 12 | 6471352   | missense | G | A | 0.057 | p.A270V  |
| 9632 | <i>ATF7IP</i>   | 181352  | 12 | 14578026  | missense | G | T | 0.100 | p.D401Y  |
| 9632 | <i>KANSL2</i>   | 17822   | 12 | 49072823  | missense | G | C | 0.263 | p.L181V  |
| 9632 | <i>HSD17B6</i>  | 3725    | 12 | 57180993  | missense | C | T | 0.100 | p.S274L  |
| 9632 | <i>CTDSP2</i>   | 5730    | 12 | 58217698  | missense | G | T | 0.067 | p.P227T  |
| 9632 | <i>CTDSP2</i>   | 5730    | 12 | 58217763  | missense | C | T | 0.228 | p.R205H  |
| 9632 | <i>CTDSP2</i>   | 5730    | 12 | 58220801  | missense | G | T | 0.111 | p.T111N  |
| 9632 | <i>CTDSP2</i>   | 5730    | 12 | 58240188  | missense | G | A | 0.103 | p.R11W   |
| 9632 | <i>NAV3</i>     | 14903   | 12 | 78593302  | missense | G | A | 0.267 | p.V2236I |
| 9632 | <i>PRDM4</i>    | 12406   | 12 | 108145611 | missense | G | C | 0.198 | p.S236C  |
| 9632 | <i>ANKLE2</i>   | 15114   | 12 | 133306731 | missense | T | C | 0.108 | p.R673G  |
| 9632 | <i>SLC39A2</i>  | 14579   | 14 | 21469691  | missense | G | T | 0.069 | p.V295L  |
| 9632 | <i>MYH7</i>     | 257     | 14 | 23898542  | missense | C | A | 0.136 | p.A385S  |
| 9632 | <i>WDR89</i>    | 80666   | 14 | 64066395  | missense | C | T | 0.082 | p.C89Y   |
| 9632 | <i>WDR89</i>    | 80666   | 14 | 64066398  | missense | G | C | 0.085 | p.A88G   |
| 9632 | <i>WDR89</i>    | 80666   | 14 | 64066402  | missense | A | G | 0.091 | p.S87P   |
| 9632 | <i>PAPLN</i>    | 173462  | 14 | 73732130  | missense | C | T | 0.192 | p.R1033W |
| 9632 | <i>NUTM1</i>    | 175741  | 15 | 34640318  | missense | C | A | 0.163 | p.F55L   |
| 9632 | <i>MGA</i>      | 1164273 | 15 | 42021452  | missense | G | T | 0.164 | p.D1250Y |
| 9632 | <i>STARD9</i>   | 20759   | 15 | 42978986  | missense | C | T | 0.241 | p.S1737F |
| 9632 | <i>LDHAL6B</i>  | 33195   | 15 | 59500155  | missense | G | A | 0.102 | p.S339N  |
| 9632 | <i>ZFH3</i>     | 6885    | 16 | 72829881  | missense | G | T | 0.174 | p.P2234T |
| 9632 | <i>OSGIN1</i>   | 182981  | 16 | 83999068  | missense | C | T | 0.218 | p.A297V  |
| 9632 | <i>KIF1C</i>    | 6612    | 17 | 4925427   | missense | C | G | 0.127 | p.S684C  |
| 9632 | <i>RAI1</i>     | 30665   | 17 | 17697096  | missense | G | C | 0.085 | p.Q278H  |
| 9632 | <i>SLFN5</i>    | 144975  | 17 | 33585731  | missense | G | A | 0.237 | p.D8N    |
| 9632 | <i>MPP2</i>     | 5374    | 17 | 41960309  | missense | G | T | 0.160 | p.R139S  |
| 9632 | <i>CDC27</i>    | 1293091 | 17 | 45229221  | missense | C | T | 0.129 | p.E341K  |
| 9632 | <i>CDC27</i>    | 1293091 | 17 | 45229228  | missense | A | C | 0.114 | p.N338K  |
| 9632 | <i>CDC27</i>    | 1293091 | 17 | 45229234  | missense | A | C | 0.105 | p.S336R  |
| 9633 | <i>DLC1</i>     | 182643  | 8  | 12943321  | stoploss | C | A | 0.206 | p.X1529L |
| 9633 | <i>NDST4</i>    | 22569   | 4  | 115767059 | stopgain | G | A | 0.213 | p.R679X  |
| 9633 | <i>SVIL</i>     | 21738   | 10 | 29840013  | stopgain | G | A | 0.267 | p.R114X  |
| 9633 | <i>WDR89</i>    | 80666   | 14 | 64066363  | stopgain | G | A | 0.055 | p.R100X  |
| 9633 | <i>DUOX2</i>    | 14080   | 15 | 45387752  | stopgain | C | T | 0.067 | p.W1374X |
| 9633 | <i>BEND5</i>    | 24603   | 1  | 49224707  | missense | G | T | 0.163 | p.L204M  |
| 9633 | <i>VWA3B</i>    | 144992  | 2  | 98736192  | missense | C | A | 0.212 | p.Q170K  |
| 9633 | <i>FSIP2</i>    | 173651  | 2  | 186696577 | missense | G | T | 0.131 | p.G6941V |
| 9633 | <i>NR1D2</i>    | 5126    | 3  | 24003867  | missense | G | A | 0.182 | p.S306N  |
| 9633 | <i>ADAMTS9</i>  | 182920  | 3  | 64554177  | missense | C | T | 0.172 | p.R1464Q |
| 9633 | <i>MBNL1</i>    | 207297  | 3  | 152132763 | missense | C | G | 0.055 | p.H70D   |
| 9633 | <i>DSPP</i>     | 14208   | 4  | 88537574  | missense | G | A | 0.092 | p.D1254N |
| 9633 | <i>ZSWIM6</i>   | 20928   | 5  | 60831400  | missense | C | T | 0.145 | p.P779S  |
| 9633 | <i>HDAC3</i>    | 3883    | 5  | 141005272 | missense | C | T | 0.225 | p.E347K  |
| 9633 | <i>BTNL3</i>    | 197975  | 5  | 180419906 | missense | C | T | 0.145 | p.A48V   |
| 9633 | <i>FAM8A1</i>   | 16255   | 6  | 17601035  | missense | A | G | 0.165 | p.H132R  |

|      |                   |         |    |           |          |   |   |       |          |
|------|-------------------|---------|----|-----------|----------|---|---|-------|----------|
| 9633 | <i>FAM8A1</i>     | 16255   | 6  | 17601040  | missense | G | A | 0.157 | p.G134S  |
| 9633 | <i>FAM8A1</i>     | 16255   | 6  | 17601041  | missense | G | T | 0.154 | p.G134V  |
| 9633 | <i>FAM8A1</i>     | 16255   | 6  | 17601044  | missense | T | C | 0.165 | p.L135P  |
| 9633 | <i>FAM8A1</i>     | 16255   | 6  | 17601058  | missense | G | A | 0.175 | p.A140T  |
| 9633 | <i>FAM8A1</i>     | 16255   | 6  | 17601086  | missense | A | G | 0.131 | p.Q149R  |
| 9633 | <i>FAM8A1</i>     | 16255   | 6  | 17601098  | missense | C | T | 0.118 | p.S153L  |
| 9633 | <i>PDGFRL</i>     | 6207    | 8  | 17447007  | missense | G | A | 0.138 | p.R29H   |
| 9633 | <i>LOXL2</i>      | 2318    | 8  | 23186032  | missense | C | T | 0.208 | p.R338H  |
| 9633 | <i>FOXB2</i>      | 1013735 | 9  | 79635495  | missense | G | C | 0.159 | p.V309L  |
| 9633 | <i>HABP4</i>      | 14282   | 9  | 99227751  | missense | A | C | 0.163 | p.E215D  |
| 9633 | <i>CNTRL</i>      | 7018    | 9  | 123919842 | missense | C | T | 0.123 | p.T1487I |
| 9633 | <i>STXBP1</i>     | 3165    | 9  | 130444690 | missense | G | A | 0.174 | p.R518H  |
| 9633 | <i>BBOX1</i>      | 3986    | 11 | 27141323  | missense | T | C | 0.053 | p.F256S  |
| 9633 | <i>CTDSP2</i>     | 5730    | 12 | 58217698  | missense | G | T | 0.103 | p.P227T  |
| 9633 | <i>CTDSP2</i>     | 5730    | 12 | 58217770  | missense | G | C | 0.076 | p.L203V  |
| 9633 | <i>CTDSP2</i>     | 5730    | 12 | 58220811  | missense | G | T | 0.067 | p.L108I  |
| 9633 | <i>SNRNP35</i>    | 180699  | 12 | 123950115 | missense | G | A | 0.204 | p.E15K   |
| 9633 | <i>ATP11A</i>     | 32189   | 13 | 113459275 | missense | C | A | 0.140 | p.T56K   |
| 9633 | <i>WDR89</i>      | 80666   | 14 | 64066352  | missense | T | A | 0.052 | p.R103S  |
| 9633 | <i>WDR89</i>      | 80666   | 14 | 64066367  | missense | A | T | 0.057 | p.D98E   |
| 9633 | <i>SETD3</i>      | 32233   | 14 | 99870629  | missense | C | G | 0.262 | p.L370F  |
| 9633 | <i>ALPK3</i>      | 20778   | 15 | 85383493  | missense | G | A | 0.231 | p.R530Q  |
| 9633 | <i>MESP2</i>      | 1039958 | 15 | 90319965  | missense | G | A | 0.141 | p.R126H  |
| 9633 | <i>LRRK1</i>      | 24652   | 15 | 101549076 | missense | C | T | 0.178 | p.P266L  |
| 9633 | <i>PIGQ</i>       | 148920  | 16 | 633184    | missense | G | C | 0.163 | p.L611F  |
| 9633 | <i>CORO7</i>      | 24535   | 16 | 4457570   | missense | C | T | 0.098 | p.G140D  |
| 9633 | <i>STAT3</i>      | 213662  | 17 | 40474420  | missense | C | A | 0.239 | p.D661Y  |
| 9633 | <i>KIR2DL4</i>    | 2255    | 19 | 55317489  | missense | C | A | 0.052 | p.Q149K  |
| 9633 | <i>KIR2DL4</i>    | 2255    | 19 | 55317490  | missense | A | G | 0.060 | p.Q149R  |
| 9633 | <i>KIR2DL4</i>    | 2255    | 19 | 55317529  | missense | A | G | 0.072 | p.E162G  |
| 9633 | <i>KIR3DL1</i>    | 13289   | 19 | 55329789  | missense | C | G | 0.077 | p.F30L   |
| 9633 | <i>KIR3DL2</i>    | 6737    | 19 | 55377280  | missense | G | A | 0.226 | p.V341I  |
| 9633 | <i>ZNF584</i>     | 173548  | 19 | 58929123  | missense | G | A | 0.053 | p.R413K  |
| 9633 | <i>DEFB132</i>    | 207469  | 20 | 239803    | missense | G | A | 0.245 | p.M48I   |
| 9633 | <i>MPST</i>       | 21126   | 22 | 37425325  | missense | C | A | 0.204 | p.L222M  |
| 9633 | <i>FAM104B</i>    | 1166703 | X  | 55172521  | missense | G | T | 0.082 | p.T114K  |
| 9633 | <i>FAM104B</i>    | 138362  | X  | 55172686  | missense | C | T | 0.077 | p.S60N   |
| 9635 | <i>WDR89</i>      | 80666   | 14 | 64066363  | stopgain | G | A | 0.111 | p.R100X  |
| 9635 | <i>FLG</i>        | 2016    | 1  | 152282092 | missense | T | C | 0.133 | p.E1757G |
| 9635 | <i>C1QTNF7</i>    | 31911   | 4  | 15444308  | missense | C | A | 0.104 | p.T252K  |
| 9635 | <i>CCDC125</i>    | 176816  | 5  | 68616126  | missense | C | A | 0.105 | p.S81I   |
| 9635 | <i>FAM8A1</i>     | 16255   | 6  | 17601058  | missense | G | A | 0.093 | p.A140T  |
| 9635 | <i>FAM8A1</i>     | 16255   | 6  | 17601086  | missense | A | G | 0.090 | p.Q149R  |
| 9635 | <i>FAM8A1</i>     | 16255   | 6  | 17601098  | missense | C | T | 0.088 | p.S153L  |
| 9635 | <i>MUC22</i>      | 1198815 | 6  | 30997575  | missense | C | A | 0.107 | p.T1456N |
| 9635 | <i>HLA-DQA2</i>   | 20056   | 6  | 32713076  | missense | A | C | 0.099 | p.S75R   |
| 9635 | <i>HLA-DQA2</i>   | 20056   | 6  | 32713080  | missense | A | G | 0.097 | p.K76R   |
| 9635 | <i>HLA-DQA2</i>   | 20056   | 6  | 32713090  | missense | T | A | 0.093 | p.S79R   |
| 9635 | <i>PEG10</i>      | 15068   | 7  | 94293635  | missense | C | T | 0.278 | p.A290V  |
| 9635 | <i>PUF60</i>      | 78480   | 8  | 144900573 | missense | C | T | 0.316 | p.M160I  |
| 9635 | <i>FRMD4A</i>     | 18027   | 10 | 13698923  | missense | T | C | 0.190 | p.D889G  |
| 9635 | <i>GOLGA7B</i>    | 1010917 | 10 | 99619251  | missense | C | A | 0.060 | p.L17M   |
| 9635 | <i>LRRC27</i>     | 30626   | 10 | 134165176 | missense | G | C | 0.141 | p.E363Q  |
| 9635 | <i>CTDSP2</i>     | 5730    | 12 | 58217698  | missense | G | T | 0.062 | p.P227T  |
| 9635 | <i>CTDSP2</i>     | 5730    | 12 | 58217763  | missense | C | T | 0.227 | p.R205H  |
| 9635 | <i>CTDSP2</i>     | 5730    | 12 | 58217770  | missense | G | C | 0.062 | p.L203V  |
| 9635 | <i>CTDSP2</i>     | 5730    | 12 | 58220811  | missense | G | T | 0.151 | p.L108I  |
| 9635 | <i>CTDSP2</i>     | 5730    | 12 | 58220819  | missense | A | G | 0.064 | p.V105A  |
| 9635 | <i>CTDSP2</i>     | 5730    | 12 | 58220831  | missense | C | G | 0.119 | p.R101T  |
| 9635 | <i>CTDSP2</i>     | 5730    | 12 | 58240188  | missense | G | A | 0.154 | p.R11W   |
| 9635 | <i>TMEM260</i>    | 17799   | 14 | 57051736  | missense | G | A | 0.073 | p.A60T   |
| 9635 | <i>WDR89</i>      | 80666   | 14 | 64066352  | missense | T | A | 0.080 | p.R103S  |
| 9635 | <i>WDR89</i>      | 80666   | 14 | 64066367  | missense | A | T | 0.120 | p.D98E   |
| 9635 | <i>WDR89</i>      | 80666   | 14 | 64066395  | missense | C | T | 0.092 | p.C89Y   |
| 9635 | <i>WDR89</i>      | 80666   | 14 | 64066398  | missense | G | C | 0.092 | p.A88G   |
| 9635 | <i>WDR89</i>      | 80666   | 14 | 64066402  | missense | A | G | 0.094 | p.S87P   |
| 9635 | <i>GALNT16</i>    | 20692   | 14 | 69806253  | missense | G | C | 0.262 | p.K368N  |
| 9635 | <i>LDHAL6B</i>    | 33195   | 15 | 59500155  | missense | G | A | 0.070 | p.S339N  |
| 9635 | <i>CDK12</i>      | 16507   | 17 | 37649029  | missense | A | G | 0.053 | p.R712G  |
| 9635 | <i>CDC27</i>      | 1293091 | 17 | 45229221  | missense | C | T | 0.182 | p.E341K  |
| 9635 | <i>CDC27</i>      | 1293091 | 17 | 45229228  | missense | A | C | 0.148 | p.N338K  |
| 9635 | <i>CDC27</i>      | 1293091 | 17 | 45229234  | missense | A | C | 0.138 | p.S336R  |
| 9635 | <i>ST6GALNAC1</i> | 18414   | 17 | 74622824  | missense | C | A | 0.057 | p.R275L  |
| 9635 | <i>JPH2</i>       | 20433   | 20 | 42788604  | missense | C | T | 0.164 | p.E275K  |

\*Based on NCBI human reference genome GRC Build 37 (hg19).

Supplementary Table 9. Identification of proteins associated with wide type or mutated Gαq protein by co-immunoprecipitation and spectra count based label free proteomics.

| NO | Bait | Prey   | PreyGene | Spec              | SpecSum | AvgSpec  | Number of Replicates | ctrlCounts        | SaintScore* | FoldChange | FDR  |
|----|------|--------|----------|-------------------|---------|----------|----------------------|-------------------|-------------|------------|------|
| 1  | WT   | A8K5J7 | BAG5     | 27708 24152 45292 | 31616   | 10538.67 | 3                    | 0 0 0             | 1           | 105386.67  | 0    |
| 1  | T96S | A8K5J7 | BAG5     | 23088 58096 6872  | 22520   | 7506.67  | 3                    | 0 0 0             | 1           | 75066.67   | 0    |
| 2  | WT   | O60884 | DNAJA2   | 60760 12616 20408 | 28248   | 9416     | 3                    | 0 0 0             | 1           | 94160      | 0    |
| 2  | T96S | O60884 | DNAJA2   | 22480 18008 53736 | 28688   | 9562.67  | 3                    | 0 0 0             | 1           | 95626.67   | 0    |
| 3  | WT   | O95816 | BAG2     | 63744 31072 56136 | 19880   | 6626.67  | 3                    | 0 0 0             | 1           | 66266.67   | 0    |
| 3  | T96S | O95816 | BAG2     | 31072 56784 36928 | 59248   | 19749.33 | 3                    | 0 0 0             | 1           | 197493.33  | 0    |
| 4  | WT   | P0DMV9 | HSPA1B   | 27192 38208 10728 | 10592   | 3530.67  | 3                    | 0 0 0             | 1           | 35306.67   | 0    |
| 4  | T96S | P0DMV9 | HSPA1B   | 45200 41136 56160 | 11424   | 3808     | 3                    | 0 0 0             | 1           | 38080      | 0    |
| 5  | WT   | P31689 | DNAJA1   | 5760 39736 57712  | 37672   | 12557.33 | 3                    | 0 0 0             | 1           | 125573.33  | 0    |
| 5  | T96S | P31689 | DNAJA1   | 6680 48056 30320  | 19520   | 6506.67  | 3                    | 0 0 0             | 1           | 65066.67   | 0    |
| 6  | WT   | P31943 | HNRNPH1  | 21784 40136 50640 | 47024   | 15674.67 | 3                    | 31984 55664 46736 | 1           | 14.2       | 0    |
| 6  | T96S | P31943 | HNRNPH1  | 59032 29240 12208 | 34944   | 11648    | 3                    | 31984 55664 46736 | 1           | 10.55      | 0    |
| 7  | WT   | P54652 | HSPA2    | 13768 23936 16088 | 53792   | 17930.67 | 3                    | 0 0 0             | 1           | 179306.67  | 0    |
| 7  | T96S | P54652 | HSPA2    | 54976 48200 54728 | 26832   | 8944     | 3                    | 0 0 0             | 1           | 89440      | 0    |
| 8  | WT   | P60866 | RPS20    | 25808 44672 20240 | 25184   | 8394.67  | 3                    | 0 26872 42288     | 1           | 6.95       | 0    |
| 8  | T96S | P60866 | RPS20    | 8264 15712 63944  | 22384   | 7461.33  | 3                    | 0 26872 42288     | 1           | 6.18       | 0    |
| 9  | WT   | P62873 | GNB1     | 12072 5336 50568  | 2440    | 813.33   | 3                    | 0 0 0             | 1           | 8133.33    | 0    |
| 9  | T96S | P62873 | GNB1     | 27112 35624 29856 | 27056   | 9018.67  | 3                    | 0 0 0             | 1           | 90186.67   | 0    |
| 10 | WT   | P62879 | GNB2     | 31400 39432 36352 | 41648   | 13882.67 | 3                    | 0 0 0             | 1           | 138826.67  | 0    |
| 10 | T96S | P62879 | GNB2     | 33168 27856 43904 | 39392   | 13130.67 | 3                    | 0 0 0             | 1           | 131306.67  | 0    |
| 11 | WT   | Q9BQA1 | WDR77    | 35776 27456 31888 | 29584   | 9861.33  | 3                    | 62480 63776 6832  | 1           | 14.67      | 0    |
| 11 | T96S | Q9BQA1 | WDR77    | 22440 3168 12928  | 38536   | 12845.33 | 3                    | 62480 63776 6832  | 0.99        | 19.12      | 0.01 |
| 12 | WT   | H0YMM1 | ANXA2    | 23808 25620 10572 | 60000   | 20000    | 3                    | 0 58880 29940     | 0*          | 2.58       | 1    |
| 12 | T96S | H0YMM1 | ANXA2    | 55316 64400 59088 | 47732   | 15910.67 | 3                    | 0 58880 29940     | 1           | 2.05       | 0    |
| 13 | WT   | P49411 | TUFM     | 31128 3096 21336  | 55560   | 18520    | 3                    | 0 0 7916          | 0.67*       | 7.02       | 0.33 |
| 13 | T96S | P49411 | TUFM     | 42752 60568 53416 | 25664   | 8554.67  | 3                    | 0 0 7916          | 1           | 3.24       | 0    |
| 14 | WT   | Q53FC7 | HSP70B   | 52176 52000 15552 | 54192   | 18064    | 3                    | 0 0 0             | 1           | 180640     | 0    |
| 14 | T96S | Q53FC7 | HSP70B   | 0 26928 48512     | 9904    | 3301.33  | 3                    | 0 0 0             | 0.67*       | 33013.33   | 0.33 |
| 15 | WT   | Q6IPH7 | RPL14    | 35224 31380 55752 | 56820   | 18940    | 3                    | 21048 5976 40408  | 1           | 29.97      | 0    |
| 15 | T96S | Q6IPH7 | RPL14    | 0 62716 22352     | 19532   | 6510.67  | 3                    | 21048 5976 40408  | 0.67*       | 10.3       | 0.33 |
| 16 | WT   | Q6IPT9 | EEF1A1   | 24400 64640 24656 | 48160   | 16053.33 | 3                    | 25136 54144 58304 | 1           | 7.4        | 0    |
| 16 | T96S | Q6IPT9 | EEF1A1   | 49928 8064 62336  | 54792   | 18264    | 3                    | 25136 54144 58304 | 0.67*       | 8.41       | 0.33 |
| 17 | WT   | Q9P219 | CCDC88C  | 50448 44696 24724 | 54332   | 18110.67 | 3                    | 0 0 0             | 1           | 181106.67  | 0    |
| 17 | T96S | Q9P219 | CCDC88C  | 50448 44696 24724 | 54332   | 18110.67 | 3                    | 0 0 0             | 1           | 181106.67  | 0    |

\*Significance Analysis of INTeractome (SAINT) expression was utilized to calculate the probability of protein-protein interaction from background, nonspecific interactions with a SAINT probability threshold of  $\geq 0.8$ . The five proteins (ANXA2, TUFM, HSP70B, RPL14 and EEF1A1) showed SAINT probability scores of  $< 0.8$  for one of the baits, suggesting that their binding is influenced by the presence/absence of the T96S mutation.

Supplementary Table 10. Significant pathways identified by gene set enrichment analysis

| NAME                                                      | SIZE | ES         | NES       | NOM p-val | FDR q-val  |
|-----------------------------------------------------------|------|------------|-----------|-----------|------------|
| KEGG_ETHER_LIPID_METABOLISM                               | 26   | 0.61113083 | 1.7556682 | 0         | 0.14206062 |
| KEGG_INTESTINAL_IMMUNE_NETWORK_FOR_IGA_PRODUCTION         | 41   | 0.50478137 | 1.5370177 | 0         | 0.21443069 |
| KEGG_TERPENOID_BACKBONE_BIOSYNTHESIS                      | 15   | 0.63365686 | 1.5663483 | 0         | 0.21745014 |
| <b>KEGG_T_CELL_RECEPTOR_SIGNALING_PATHWAY</b>             | 101  | 0.33099383 | 1.5453835 | 0         | 0.21775618 |
| KEGG_ALLOGRAFT_REJECTION                                  | 28   | 0.54870063 | 1.5702128 | 0         | 0.23435001 |
| KEGG_TYPE_I_DIABETES_MELLITUS                             | 33   | 0.4488917  | 1.4510427 | 0         | 0.24647677 |
| KEGG_FOCAL_ADHESION                                       | 194  | 0.38443148 | 1.4522494 | 0         | 0.2570027  |
| KEGG_AXON_GUIDANCE                                        | 124  | 0.48318574 | 1.5887975 | 0         | 0.261466   |
| KEGG_COMPLEMENT_AND_COAGULATION_CASCADES                  | 58   | 0.56535196 | 1.4586229 | 0         | 0.26914763 |
| KEGG_HEMATOPOIETIC_CELL_LINEAGE                           | 73   | 0.49186575 | 1.4634719 | 0         | 0.27680755 |
| KEGG_NEUROTROPHIN_SIGNALING_PATHWAY                       | 120  | 0.2868243  | 1.4270812 | 0         | 0.28059024 |
| KEGG_GLYCEROPHOSPHOLIPID_METABOLISM                       | 67   | 0.3541833  | 1.3977689 | 0         | 0.2811309  |
| KEGG_GLYCOSAMINOGLYCAN_DEGRADATION                        | 20   | 0.55429554 | 1.4066336 | 0         | 0.2854676  |
| KEGG_ASTHMA                                               | 21   | 0.60966164 | 1.4809217 | 0         | 0.28819868 |
| KEGG_AUTOIMMUNE_THYROID_DISEASE                           | 32   | 0.5157162  | 1.4140673 | 0         | 0.28938106 |
| <b>KEGG_MAPK_SIGNALING_PATHWAY</b>                        | 244  | 0.3336603  | 1.4852967 | 0         | 0.30279276 |
| KEGG_ALPHA_LINOLENIC_ACID_METABOLISM                      | 15   | 0.6568755  | 1.5890207 | 0         | 0.31483272 |
| KEGG_ECM_RECEPTOR_INTERACTION                             | 81   | 0.4195791  | 1.3275493 | 0         | 0.33419177 |
| KEGG_ARRHYTHMOGENIC_RIGHT_VENTRICULAR_CARDIOMYOPATHY_ARVC | 69   | 0.43407646 | 1.3303643 | 0         | 0.34663492 |
| KEGG_HYPERTROPHIC_CARDIOMYOPATHY_HCM                      | 75   | 0.4339285  | 1.3510684 | 0         | 0.34878737 |
| KEGG_DILATED_CARDIOMYOPATHY                               | 80   | 0.43336964 | 1.3574308 | 0         | 0.35530043 |
| KEGG_GRAFT_VERSUS_HOST_DISEASE                            | 31   | 0.4115281  | 1.2700267 | 0         | 0.39485765 |
| KEGG_CELL_ADHESION_MOLECULES_CAMS                         | 123  | 0.3470763  | 1.2585121 | 0         | 0.39760044 |
| KEGG_ENDOCYTOSIS                                          | 173  | 0.30305654 | 1.5913094 | 0         | 0.40377685 |
| KEGG_CALCIIUM_SIGNALING_PATHWAY                           | 157  | 0.3212866  | 1.2704787 | 0         | 0.40604636 |
| KEGG_LINOLEIC_ACID_METABOLISM                             | 23   | 0.5034449  | 1.2907393 | 0         | 0.40924773 |



Supplementary Table 11. Associations between *GNAQ* T96S mutations and clinical characteristics.

| Characteristics              | Total<br>(n=99) | Wild type<br>(n=90) | T96S<br>(n=9) | P     |
|------------------------------|-----------------|---------------------|---------------|-------|
| Age (years)                  |                 |                     |               | 0.336 |
| ≤60                          | 86              | 79                  | 7             |       |
| >60                          | 13              | 11                  | 2             |       |
| Gender                       |                 |                     |               | 0.719 |
| Male                         | 70              | 64                  | 6             |       |
| Female                       | 29              | 26                  | 3             |       |
| Ann Arbor stage              |                 |                     |               | 0.025 |
| I/II                         | 68              | 65                  | 3             |       |
| III/IV                       | 31              | 25                  | 6             |       |
| Serum LDH                    |                 |                     |               | 0.719 |
| Normal                       | 69              | 62                  | 7             |       |
| Increased                    | 30              | 28                  | 2             |       |
| B symptoms                   |                 |                     |               | 0.149 |
| Absence                      | 60              | 57                  | 3             |       |
| Presence                     | 39              | 33                  | 6             |       |
| Primary site                 |                 |                     |               | 0.592 |
| Nasal                        | 89              | 80                  | 9             |       |
| Non-nasal                    | 10              | 10                  | 0             |       |
| ECOG PS                      |                 |                     |               | 0.154 |
| 0-1                          | 91              | 84                  | 7             |       |
| ≥2                           | 8               | 6                   | 2             |       |
| Ki67                         |                 |                     |               | 0.035 |
| ≤50%                         | 46              | 45                  | 1             |       |
| >50%                         | 53              | 45                  | 8             |       |
| IPI score                    |                 |                     |               | 0.622 |
| 0-2                          | 84              | 77                  | 7             |       |
| 3-5                          | 15              | 13                  | 2             |       |
| TCR expression               |                 |                     |               | 1.000 |
| NK cell origin (βF1/ TCRγ -) | 95              | 86                  | 9             |       |
| T cell origin (βF1/ TCRγ +)  | 4               | 4                   | 0             |       |
| EBER                         |                 |                     |               | N/A   |
| Positive                     | 99              | 90                  | 9             |       |
| Negative                     | 0               | 0                   | 0             |       |
| CD3ε                         |                 |                     |               | N/A   |
| Positive                     | 99              | 90                  | 9             |       |
| Negative                     | 0               | 0                   | 0             |       |
| CD2                          |                 |                     |               | 1.000 |
| Positive                     | 96              | 87                  | 9             |       |
| Negative                     | 3               | 3                   | 0             |       |

|                             |    |    |   |       |
|-----------------------------|----|----|---|-------|
| CD4                         |    |    |   | N/A   |
| Positive                    | 0  | 0  | 0 |       |
| Negative                    | 99 | 90 | 9 |       |
| CD8                         |    |    |   | 1.000 |
| Positive                    | 1  | 1  | 0 |       |
| Negative                    | 98 | 89 | 9 |       |
| TCR rearrangement           |    |    |   | 0.547 |
| No                          | 91 | 83 | 8 |       |
| Yes                         | 8  | 7  | 1 |       |
| Therapy                     |    |    |   | 0.495 |
| Chemotherapy alone          | 50 | 44 | 6 |       |
| Radiotherapy alone          | 7  | 7  | 0 |       |
| Chemotherapy + Radiotherapy | 42 | 39 | 3 |       |

Abbreviations: Serum LDH, Serum lactate dehydrogenase; ECOG PS, Eastern Cooperative Oncology Group performance status; IPI, International Prognostic Index; EBER, Epstein-Barr virus (EBV)-encoded small RNAs; N/A, not applicable.

Supplementary Table 12. Univariate and multivariate analysis for clinical and biological characteristics of overall survival and progression-free survival in NKTCL.

Univariate analysis

|                           | OS              | PFS             |
|---------------------------|-----------------|-----------------|
|                           | <i>P</i> (FDR*) | <i>P</i> (FDR*) |
| Age > 60                  | 0.856           | 0.661           |
| Gender (male)             | 0.692           | 0.165           |
| B symptoms                | 0.010           | 0.018           |
| Primary site (non-nasal)  | 0.013           | 0.003           |
| IPI score > 2             | < 0.001         | < 0.001         |
| Ki67 > 50%                | 0.018           | 0.034           |
| Therapy (CT vs RT vs CMT) | 0.084           | 0.164           |
| <i>DDX3X</i> mutation     | 0.001 (0.033)   | 0.008 (0.059)   |
| <i>TP53</i> mutation      | 0.003 (0.043)   | < 0.001 (0.013) |
| <i>GNAQ</i> T96S mutation | 0.006 (0.048)   | 0.005 (0.059)   |

\*Derived *P* values were adjusted for FDR using the Benjamini-Hochberg method.

Multivariate analysis

|                           | OS                  |          | PFS                 |          |
|---------------------------|---------------------|----------|---------------------|----------|
|                           | HR (95%CI)          | <i>P</i> | HR (95%CI)          | <i>P</i> |
| B symptoms                | 1.673 (0.843–3.319) | 0.141    | 1.540 (0.816–2.906) | 0.183    |
| Primary site (non-nasal)  | 3.328 (1.169–9.472) | 0.024    | 3.311 (1.269–8.633) | 0.014    |
| IPI score > 2             | 3.996 (1.760–9.071) | 0.001    | 3.783 (1.727–8.283) | 0.001    |
| Ki67 > 50%                | 1.791 (0.875–3.668) | 0.111    | 1.709 (0.896–3.260) | 0.104    |
| <i>GNAQ</i> T96S mutation | 3.314 (1.333–8.242) | 0.010    | 2.847 (1.273–6.368) | 0.011    |

Abbreviations: IPI, International Prognostic Index; CT, Chemotherapy alone; RT, Radiotherapy alone; CMT, Chemotherapy + Radiotherapy; HR, hazard ratio. CI, confidence interval.

Supplementary Table 13. Primers for genotyping knockout mice.

|                             | Primers           | Sequence                     | Product size            |
|-----------------------------|-------------------|------------------------------|-------------------------|
| Flanking <i>LoxP</i> 1 (P1) | F1                | GCATTACGGTATGTCAGATACAAC     | <i>floxed</i> : 244bp   |
|                             | R1                | TCGGTCCAATCCATCTTCCAT        | wild-type: 210bp        |
| <i>Ncr1-Cre</i> (P2)        | <i>Ncr1-cre-F</i> | GACCATGATGCTGGGTTTGGCCCAGATG | <i>Ncr1-Cre</i> : 500bp |
|                             | <i>Ncr1-cre-R</i> | ATGCGGTGGGCTCTATGGCTTCTG     |                         |

Supplementary Table 14. Somatic copy-number alterations of the 28 exome-sequencing cases.

| Cytoband | Wide Peak Boundaries*     | P_value    | Q_value    | 8221 | 8191 | 8184 | 9638 | 8208 | 9626 | 9624 | 3329 | 9616 | 3326 | 9622 | 3325 | 8198 | 3324 | 8219 | 9623 | 3327 | 3336 | 151 | 8186 | 3337 | 8210 | 9634 | 8194 | 8751 | 8188 | 8199 | 149 |
|----------|---------------------------|------------|------------|------|------|------|------|------|------|------|------|------|------|------|------|------|------|------|------|------|------|-----|------|------|------|------|------|------|------|------|-----|
| 10q22.1  | chr10:70998001-73827499   | 0.00053207 | 0.0023316  | 5.7  | 4    | 4.7  | 2    | 2    | 4    | 3.3  | 2.7  | 2    | 2    | 2    | 2    | 2    | 2    | 5.3  | 2    | 1.3  | 4    | 2   | 3    | 5.7  | 4    | 2    | 2    | 5.7  | 5.7  | 2    | 1.3 |
| 10q22.2  | chr10:75522251-75758249   | 5.11E-10   | 3.18E-09   | 5.7  | 5.7  | 5.3  | 2    | 2    | 5    | 4    | 4    | 2    | 4    | 2    | 4    | 2    | 2    | 4.7  | 4    | 1.3  | 5    | 2   | 2    | 5    | 4    | 2    | 4    | 5.7  | 5.7  | 4    | 3.3 |
| 10q24.31 | chr10:102045251-102295999 | 0.00010976 | 0.0003657  | 5.7  | 4    | 4    | 2    | 2    | 2    | 4    | 2.7  | 2    | 4    | 2    | 2    | 3    | 4    | 4    | 1.3  | 4    | 2    | 2   | 5    | 3    | 2    | 5    | 5.7  | 4    | 4    | 1.3  |     |
| 10q26.3  | chr10:133758001-135534747 | 0.0013974  | 0.004859   | 5.7  | 3    | 5.7  | 3    | 2    | 2    | 4    | 2.7  | 2    | 4    | 2    | 2    | 1    | 2    | 5.7  | 2    | 1.3  | 5    | 2   | 2    | 5.7  | 2    | 2    | 2    | 4    | 5.7  | 2    | 1.3 |
| 11p11.2  | chr11:47598501-47603999   | 0.013851   | 0.060619   | 5.7  | 5    | 4    | 2    | 2    | 3    | 2.7  | 2    | 2    | 2    | 2    | 2    | 2    | 2    | 5.3  | 2    | 1.3  | 4    | 2   | 2    | 5.7  | 5.7  | 2    | 2    | 5.7  | 5.7  | 2    | 1.3 |
| 11p15.1  | chr11:17526501-17757749   | 0.15131    | 0.18901    | 5.7  | 5    | 4.7  | 2    | 2    | 3    | 3.3  | 2.7  | 2    | 2    | 2    | 2    | 2    | 2    | 5.3  | 2    | 1.3  | 4    | 2   | 2    | 5.7  | 2    | 2    | 2    | 4    | 4    | 2    | 1.3 |
| 11p15.4  | chr11:5988751-6226749     | 1.82E-09   | 1.15E-08   | 5.7  | 5.7  | 5.7  | 2    | 2    | 4    | 4    | 2.7  | 2    | 4    | 2    | 4    | 3    | 3    | 5.7  | 5.7  | 2.7  | 5.7  | 4   | 2    | 2    | 4    | 2    | 4    | 5.7  | 5.7  | 5    | 2.7 |
| 11p15.5  | chr11:1-2966999           | 0.00053207 | 0.0030999  | 5.7  | 4    | 5.7  | 3    | 2    | 4    | 4    | 2.7  | 2    | 4    | 2    | 2    | 2    | 2    | 5.7  | 2    | 1.3  | 5.7  | 2   | 2    | 5    | 4    | 2    | 2    | 5.7  | 5    | 2    | 1.3 |
| 11q12.1  | chr11:56948501-57144249   | 0.0032655  | 0.022154   | 5.7  | 4    | 4.7  | 2    | 2    | 4    | 4    | 3.3  | 2    | 2    | 2    | 2    | 2    | 2    | 3.3  | 4    | 1.3  | 5.7  | 2   | 2    | 5.7  | 4    | 2    | 2    | 5.7  | 4    | 3    | 1.3 |
| 11q12.3  | chr11:62341501-62648749   | 6.91E-06   | 0.00010453 | 5.7  | 5.7  | 4.7  | 2    | 2    | 3    | 4    | 3.3  | 2    | 5    | 2    | 3    | 3    | 2    | 4    | 4    | 1.3  | 4    | 3   | 4    | 5    | 2    | 2    | 3    | 5.7  | 5.7  | 4    | 1.3 |
| 11q13.1  | chr11:65265251-65273499   | 3.45E-10   | 8.58E-09   | 4    | 4    | 5.7  | 1    | 2    | 4    | 4    | 2.7  | 2    | 4    | 2    | 4    | 5.7  | 5    | 5.7  | 2    | 4.7  | 5.7  | 3   | 4    | 5.7  | 3    | 2    | 4    | 5.7  | 5.7  | 3    | 2.7 |
| 11q23.3  | chr11:118483751-120201249 | 0.0077282  | 0.0077282  | 5.7  | 4    | 5.3  | 2    | 2    | 4    | 2.7  | 2.7  | 2    | 2    | 2    | 2    | 2    | 2    | 4.7  | 2    | 1.3  | 4    | 3   | 2    | 5    | 4    | 2    | 3    | 5.7  | 5.7  | 2    | 1.3 |
| 12p13.31 | chr12:6976001-7075249     | 6.91E-06   | 6.91E-06   | 5.7  | 4    | 4.7  | 2    | 2    | 4    | 4    | 3.3  | 2    | 5.7  | 2    | 3    | 2    | 2    | 4    | 2    | 1.3  | 4    | 2   | 3    | 5.7  | 2    | 2    | 2    | 5.7  | 5.7  | 4    | 1.3 |
| 12q13.12 | chr12:49980501-50136249   | 1.95E-06   | 2.40E-05   | 5.7  | 4    | 4.7  | 2    | 2    | 4    | 4    | 2.7  | 2    | 3    | 2    | 3    | 2    | 2    | 5.3  | 3    | 1.3  | 4    | 2   | 2    | 5    | 4    | 2    | 4    | 5.7  | 5.7  | 4    | 1.3 |
| 12q13.2  | chr12:56029751-58009249   | 9.73E-07   | 1.27E-05   | 5.7  | 5    | 4.7  | 2    | 2    | 4    | 4    | 2.7  | 2    | 4    | 2    | 3    | 2    | 2    | 4    | 3    | 1.3  | 4    | 3   | 2    | 5    | 2    | 2    | 5    | 5.7  | 5.7  | 4    | 1.3 |
| 12q24.12 | chr12:111741251-111893999 | 0.047739   | 0.15856    | 4    | 5.7  | 5.7  | 2    | 2    | 2    | 4    | 1.3  | 2    | 2    | 2    | 2    | 2    | 2    | 5.7  | 2    | 1.3  | 2    | 2   | 2    | 4    | 2    | 2    | 2    | 4    | 5.7  | 2    | 1.3 |
| 12q24.31 | chr12:123334001-123485499 | 1.48E-05   | 8.22E-05   | 5.7  | 5    | 5.7  | 3    | 2    | 2    | 4    | 3.3  | 2    | 4    | 2    | 2    | 2    | 2    | 5.7  | 2    | 1.3  | 5.7  | 4   | 2    | 5.7  | 2    | 2    | 2    | 4    | 5.7  | 2    | 1.3 |
| 12q24.31 | chr12:124371001-133446499 | 0.0032655  | 0.0062965  | 5.7  | 4    | 4    | 2    | 2    | 2    | 2.7  | 3.3  | 2    | 5    | 2    | 2    | 2    | 2    | 5.7  | 2    | 1.3  | 4    | 2   | 2    | 5.7  | 2    | 2    | 2    | 4    | 5.7  | 2    | 1.3 |
| 13q34    | chr13:114497751-114806749 | 0.0077282  | 0.0077282  | 5.7  | 4    | 4.7  | 4    | 2    | 2    | 2.7  | 2.7  | 2    | 2    | 2    | 2    | 2    | 2    | 5.7  | 2    | 1.3  | 4    | 3   | 2    | 4    | 2    | 2    | 2    | 4    | 5.7  | 2    | 1.3 |
| 14q11.2  | chr14:22591001-22965749   | 2.96E-08   | 0.00027281 | 4    | 5.7  | 2.7  | 3    | 2    | 4    | 2.7  | 2.7  | 2    | 5.7  | 2    | 4    | 2    | 5.7  | 2.7  | 4    | 4    | 4    | 4   | 5.7  | 2    | 4    | 4    | 4    | 5    | 4    | 4    | 2.7 |
| 14q12    | chr14:24600501-24777249   | 1.42E-10   | 7.93E-07   | 5.7  | 5.7  | 5.7  | 2    | 2    | 4    | 4    | 4    | 2    | 4    | 2    | 4    | 4    | 2    | 4.7  | 4    | 1.3  | 5.7  | 3   | 3    | 5.7  | 4    | 2    | 4    | 5.7  | 5.7  | 4    | 2.7 |
| 14q23.3  | chr14:65193751-66028499   | 0.01135    | 0.028511   | 4    | 5.7  | 5.3  | 2    | 2    | 2    | 3.3  | 2    | 2    | 2    | 2    | 2    | 2    | 4    | 4.7  | 2    | 2.7  | 4    | 2   | 2    | 4    | 3    | 2    | 2    | 5.7  | 5    | 2    | 1.3 |
| 14q24.3  | chr14:74705501-75052999   | 0.033529   | 0.076371   | 5.7  | 4    | 2.7  | 2    | 2    | 2    | 2.7  | 4    | 2    | 2    | 2    | 2    | 2    | 2    | 5.7  | 2    | 1.3  | 5    | 2   | 2    | 4    | 3    | 2    | 2    | 5    | 5.7  | 2    | 1.3 |
| 14q32.33 | chr14:104638751-107349540 | 0.00011734 | 0.00017239 | 5.7  | 4    | 5.7  | 4    | 2    | 2    | 4    | 1.3  | 2    | 5    | 2    | 2    | 1    | 2    | 5.7  | 2    | 1.3  | 4    | 3   | 2    | 5.7  | 2    | 2    | 2    | 5.7  | 5.7  | 2    | 1.3 |
| 15q15.1  | chr15:42058501-42305999   | 0.00011734 | 0.00053099 | 5.7  | 4    | 5.7  | 2    | 2    | 2    | 4    | 3.3  | 2    | 2    | 2    | 3    | 2    | 2    | 5.7  | 2    | 1.3  | 5.7  | 3   | 2    | 5.7  | 2    | 2    | 2    | 5.7  | 5.7  | 2    | 2   |
| 15q15.1  | chr15:41031501-41247999   | 0.011787   | 0.051365   | 5    | 4    | 5.7  | 2    | 2    | 2    | 4    | 2.7  | 2    | 2    | 2    | 2    | 2    | 2    | 5.7  | 2    | 1.3  | 5    | 2   | 2    | 2    | 4    | 2    | 2    | 5.7  | 5.7  | 2    | 1.3 |
| 15q15.1  | chr15:40544251-40866499   | 0.013851   | 0.061644   | 5    | 4    | 5.7  | 2    | 2    | 2    | 3.3  | 2.7  | 2    | 4    | 2    | 2    | 2    | 2    | 5.7  | 2    | 1.3  | 4    | 2   | 2    | 2    | 4    | 2    | 2    | 5.7  | 5.7  | 2    | 1.3 |
| 15q21.1  | chr15:45364751-45545749   | 0.024164   | 0.11594    | 5.7  | 5    | 3.3  | 2    | 2    | 3    | 2.7  | 1.3  | 2    | 2    | 2    | 2    | 2    | 4    | 4.7  | 2    | 1.3  | 5    | 3   | 2    | 2    | 2    | 2    | 2    | 5.7  | 4    | 2    | 2   |
| 15q24.1  | chr15:73614001-75660999   | 0.0032655  | 0.035828   | 5.7  | 4    | 5.3  | 2    | 2    | 2    | 2.7  | 2.7  | 2    | 2    | 2    | 2    | 2    | 2    | 4.7  | 2    | 1.3  | 4    | 4   | 2    | 5    | 2    | 2    | 3    | 5    | 5.7  | 2    | 1.3 |
| 15q26.1  | chr15:91448251-91503749   | 0.00014941 | 0.00078684 | 5.7  | 5.7  | 5.7  | 3    | 2    | 2    | 4    | 2.7  | 2    | 2    | 2    | 2    | 2    | 2    | 5.7  | 2    | 1.3  | 5    | 2   | 2    | 5    | 3    | 2    | 2    | 5.7  | 5.7  | 2    | 1.3 |
| 15q26.1  | chr15:79215001-90905749   | 0.0059741  | 0.16545    | 5    | 4    | 4.7  | 2    | 2    | 2    | 3.3  | 2.7  | 2    | 2    | 2    | 3    | 2    | 2    | 4.7  | 2    | 1.3  | 4    | 2   | 2    | 5    | 3    | 2    | 2    | 5.7  | 5.7  | 2    | 1.3 |
| 16p11.2  | chr16:28497001-31336499   | 0.0059741  | 0.0059741  | 5.7  | 4    | 5.7  | 2    | 2    | 3    | 3.3  | 2.7  | 2    | 5    | 2    | 4    | 2    | 2    | 5.7  | 2    | 1.3  | 5    | 2   | 4    | 5.7  | 3    | 2    | 3    | 5.7  | 5.7  | 4    | 1.3 |
| 16p13.3  | chr16:1-105499            | 0.0027896  | 0.0027896  | 5.7  | 4    | 5.7  | 2    | 2    | 4    | 4    | 3.3  | 2    | 4    | 2    | 2    | 2    | 2    | 5.3  | 2    | 1.3  | 5.7  | 3   | 2    | 5.7  | 2    | 2    | 5    | 5.7  | 5.7  | 5.7  | 1.3 |
| 16q22.1  | chr16:67182251-67264749   | 0.034747   | 0.034747   | 5.7  | 5    | 5.7  | 2    | 2    | 2    | 4    | 3.3  | 2    | 5.7  | 2    | 3    | 2    | 2    | 5.7  | 2    | 1.3  | 5.7  | 3   | 2    | 5.7  | 2    | 2    | 2    | 5.7  | 5.7  | 2    | 1.3 |
| 17p11.2  | chr17:16843001-19459249   | 0.020377   | 0.038272   | 5.7  | 4    | 4.7  | 2    | 2    | 3    | 3.3  | 2.7  | 2    | 2    | 2    | 3    | 2    | 2    | 5.7  | 3    | 1.3  | 4    | 2   | 2    | 5    | 2    | 2    | 2    | 5.7  | 5.7  | 2    | 1.3 |
| 17p13.1  | chr17:7720501-8198249     | 4.57E-09   | 7.33E-09   | 5.7  | 5.7  | 5.7  | 2    | 2    | 4    | 4.7  | 2.7  | 2    | 5    | 2    | 4    | 2    | 2    | 5.7  | 4    | 1.3  | 5.7  | 3   | 4    | 5.7  | 3    | 2    | 4    | 5.7  | 5.7  | 4    | 1.3 |
| 17p13.2  | chr17:4794751-4851999     | 0.0065873  | 0.0065873  | 5.7  | 4    | 4.7  | 2    | 2    | 2    | 4    | 3.3  | 2    | 5.7  | 2    | 2    | 2    | 2    | 4.7  | 2    | 1.3  | 5    | 2   | 2    | 5.7  | 2    | 2    | 2    | 5.7  | 5.7  | 2    | 1.3 |
| 17q11.2  | chr17:26655251-27022749   | 6.45E-05   | 0.00017586 | 5.7  | 5    | 4.7  | 2    | 2    | 4    | 3.3  | 2.7  | 2    | 3    | 2    | 2    | 2    | 2    | 5.7  | 4    | 1.3  | 4    | 4   | 2    | 5.7  | 4    | 2    | 4    | 5.7  | 5    | 3    | 1.3 |
| 17q11.2  | chr17:27888751-27959499   | 0.0018981  | 0.0036057  | 5.7  | 5.7  | 5.7  | 2    | 2    | 2    | 4    | 2.7  | 2    | 2    | 2    | 2    | 2    | 3    | 5.7  | 2    | 2    | 5.7  | 2   | 2    | 5.7  | 2    | 2    | 2    | 5.7  | 5.7  | 2    | 1.3 |
| 17q21.2  | chr17:39323251-39657249   | 4.92E-05   | 0.00014941 | 5.7  | 5    | 5.3  | 2    | 2    | 4    | 3.3  | 2.7  | 2    | 2    | 4    | 2    | 2    | 2    | 5.3  | 2    | 2    | 4    | 2   | 4    | 5.7  | 4    | 2    | 2    | 5.7  | 5.7  | 4    | 2   |
| 17q21.31 | chr17:42750751-44110999   | 0.00066624 | 0.018813   | 5.7  | 4    | 4.7  | 2    | 2    | 3    | 4    | 2.7  | 2    | 2    | 2    | 3    | 2    | 2    | 5.7  | 2    | 1.3  | 5    | 2   | 2    | 5.7  | 4    | 2    | 2    | 5.7  | 5.7  | 4    | 1.3 |
| 17q21.33 | chr17:47920501-48761499   | 0.00053207 | 0.029018   | 5.7  | 4    | 5.7  | 2    | 2    | 3    | 3.3  | 2.7  | 2    | 2    | 2    | 2    | 2    | 2    | 5.7  | 3    | 1.3  | 5    | 2   | 2    | 5    | 4    | 2    | 2    | 5.7  | 5.7  | 4    | 1.3 |
| 17q22    | chr17:54587001-56621749   | 0.00092532 | 0.0082362  | 5    | 5    | 4.7  | 2    | 2    | 4    | 3.3  | 2.7  | 2    | 2    | 2    | 2    | 2    | 2    | 4    | 4    | 1.3  | 5    | 2   | 2    | 5    | 4    | 2    | 2    | 5.7  | 5    | 4    | 1.3 |

|          |                          |            |            |     |     |     |   |     |     |     |     |   |     |     |     |   |     |     |     |     |     |   |     |     |   |   |     |     |     |     |     |
|----------|--------------------------|------------|------------|-----|-----|-----|---|-----|-----|-----|-----|---|-----|-----|-----|---|-----|-----|-----|-----|-----|---|-----|-----|---|---|-----|-----|-----|-----|-----|
| 17q23.3  | chr17:61895001-61907999  | 1.47E-05   | 5.96E-05   | 5.7 | 4   | 5.3 | 2 | 2   | 5   | 3.3 | 2.7 | 2 | 2   | 2   | 2   | 2 | 2   | 4.7 | 4   | 1.3 | 5   | 2 | 3   | 5.7 | 5 | 2 | 2   | 5.7 | 5   | 5   | 2.7 |
| 17q23.3  | chr17:60748251-61788499  | 0.0288     | 0.08947    | 5.7 | 4   | 4   | 2 | 2   | 4   | 3.3 | 2.7 | 2 | 2   | 2   | 2   | 2 | 4   | 2   | 1.3 | 5   | 2   | 3 | 5.7 | 2   | 2 | 2 | 5.7 | 5   | 2   | 1.3 |     |
| 17q25.1  | chr17:73227501-73916499  | 0.00017915 | 0.00017915 | 5.7 | 4   | 5.7 | 2 | 2   | 2   | 3.3 | 2.7 | 2 | 4   | 3   | 2   | 2 | 2   | 5.7 | 2   | 1.3 | 5.7 | 3 | 2   | 5.7 | 2 | 2 | 3   | 5.7 | 5.7 | 4   | 1.3 |
| 18p11.22 | chr18:9234751-9256749    | 0.01135    | 0.01135    | 4   | 4   | 2.7 | 2 | 2   | 2   | 1.3 | 1.3 | 2 | 5.7 | 2   | 5.7 | 5 | 4   | 2.7 | 2   | 3.3 | 2   | 5 | 2   | 2   | 2 | 2 | 2   | 4   | 2   | 3.3 |     |
| 18q21.1  | chr18:47805251-47806499  | 0.00013499 | 0.0013974  | 5.7 | 5.7 | 5.7 | 2 | 2   | 4   | 2.7 | 4.7 | 2 | 5   | 2.9 | 2   | 2 | 2   | 3.3 | 2   | 1.3 | 5.7 | 2 | 2   | 2   | 2 | 2 | 4   | 4   | 5.7 | 2   | 1.3 |
| 18q21.1  | chr18:43795251-44301499  | 0.0095186  | 0.14075    | 5.7 | 5.7 | 3.3 | 2 | 2   | 5   | 4.7 | 2   | 2 | 2   | 2   | 2   | 2 | 3.3 | 4   | 1.3 | 5   | 2   | 2 | 2   | 2   | 2 | 2 | 4   | 4   | 3   | 1.3 |     |
| 18q23    | chr18:72672251-78077248  | 0.040468   | 0.040468   | 4   | 4   | 4.7 | 4 | 2   | 2   | 2.7 | 2   | 2 | 4   | 2   | 2   | 2 | 4.7 | 2   | 1.3 | 4   | 2   | 2 | 2   | 3   | 2 | 2 | 4   | 5   | 3   | 1.3 |     |
| 19p13.11 | chr19:15052501-19790499  | 0.0032655  | 0.030586   | 5.7 | 4   | 4.7 | 2 | 2   | 2   | 2.7 | 2.7 | 2 | 2   | 2   | 2   | 2 | 5.7 | 2   | 1.3 | 4   | 2   | 2 | 5.7 | 4   | 2 | 3 | 5.7 | 5.7 | 4   | 1.3 |     |
| 19p13.12 | chr19:12815251-14717749  | 0.00041796 | 0.0037631  | 5.7 | 4   | 5.7 | 2 | 2   | 2   | 4   | 2.7 | 2 | 4   | 2   | 3   | 2 | 2   | 5.7 | 2   | 1.3 | 4   | 2 | 5   | 5.7 | 2 | 2 | 2   | 5.7 | 5.7 | 2   | 1.3 |
| 19p13.2  | chr19:9045251-9091749    | 6.88E-07   | 1.16E-05   | 5.7 | 5.7 | 4   | 2 | 2   | 5.7 | 4   | 2.7 | 2 | 2   | 2   | 4   | 2 | 2   | 4   | 4   | 1.3 | 5.7 | 2 | 2   | 5.7 | 5 | 2 | 4   | 5.7 | 4   | 4   | 2.7 |
| 19p13.2  | chr19:9921001-11660749   | 0.0040378  | 0.0040378  | 5.7 | 4   | 5.3 | 2 | 3.3 | 2   | 3.3 | 2.7 | 2 | 4   | 2   | 2   | 2 | 2   | 5.7 | 2   | 1.3 | 4   | 2 | 2   | 5.7 | 2 | 2 | 2   | 5.7 | 5.7 | 2   | 1.3 |
| 19p13.3  | chr19:1-2813249          | 0.00053207 | 0.0069643  | 5.7 | 4   | 5.7 | 3 | 2   | 2   | 2.7 | 2.7 | 2 | 4   | 2   | 2   | 2 | 2   | 5.7 | 2   | 1.3 | 5   | 2 | 4   | 5.7 | 3 | 2 | 2   | 5.7 | 5.7 | 2   | 1.3 |
| 19p13.3  | chr19:2938751-6831999    | 0.0059741  | 0.070781   | 5.7 | 4   | 5.7 | 2 | 2   | 2   | 2.7 | 2.7 | 2 | 4   | 2   | 2   | 2 | 2   | 5.7 | 2   | 1.3 | 5   | 2 | 2   | 5.7 | 2 | 2 | 2   | 5.7 | 5.7 | 2   | 1.3 |
| 19q13.12 | chr19:35448251-36637249  | 1.18E-05   | 1.74E-05   | 5.7 | 4   | 5.7 | 2 | 2   | 3   | 4   | 2.7 | 2 | 4   | 2   | 5   | 2 | 2   | 5.7 | 2   | 1.3 | 5.7 | 2 | 2   | 5.7 | 3 | 2 | 2   | 5.7 | 5.7 | 4   | 1.3 |
| 19q13.2  | chr19:39875751-40487249  | 4.92E-05   | 0.00014927 | 5.7 | 5.7 | 5.7 | 2 | 2   | 2   | 4   | 2.7 | 2 | 3   | 2   | 4   | 4 | 2   | 4.7 | 2   | 1.3 | 5   | 2 | 3   | 5.7 | 2 | 2 | 2   | 5.7 | 5   | 4   | 1.3 |
| 19q13.31 | chr19:40719251-44306749  | 0.00022291 | 0.00054954 | 5.7 | 4   | 5.7 | 2 | 2   | 2   | 4   | 2.7 | 2 | 4   | 2   | 5   | 2 | 2   | 5.7 | 2   | 1.3 | 4   | 2 | 2   | 5.7 | 2 | 2 | 2   | 5.7 | 5.7 | 4   | 1.3 |
| 19q13.33 | chr19:48789251-52327499  | 0.00010976 | 0.00032197 | 5.7 | 4   | 5.7 | 2 | 2   | 2   | 4   | 2.7 | 2 | 4   | 2   | 5   | 2 | 2   | 5.7 | 2   | 1.3 | 5   | 2 | 4   | 5.7 | 2 | 2 | 2   | 5.7 | 5.7 | 2   | 1.3 |
| 19q13.42 | chr19:55856751-56041749  | 0.00010976 | 0.00097242 | 5.7 | 4   | 5.7 | 3 | 2   | 2   | 4   | 2.7 | 2 | 5   | 2   | 5   | 2 | 2   | 5.7 | 2   | 1.3 | 5   | 2 | 2   | 5.7 | 2 | 2 | 2   | 5.7 | 5.7 | 2   | 1.3 |
| 19q13.43 | chr19:58981751-59128983  | 1.48E-05   | 8.66E-05   | 5.7 | 5   | 5.7 | 2 | 2   | 4   | 3.3 | 2.7 | 2 | 3   | 2   | 5   | 2 | 2   | 5.7 | 2   | 1.3 | 5   | 2 | 3   | 5.7 | 2 | 2 | 4   | 5.7 | 5.7 | 2   | 2   |
| 1p13.3   | chr1:109642001-110884999 | 0.0011277  | 0.019067   | 5.7 | 4   | 4.7 | 2 | 2   | 4   | 2.7 | 2.7 | 2 | 2   | 2   | 2   | 2 | 2   | 4.7 | 3   | 1.3 | 4   | 2 | 2   | 5.7 | 4 | 2 | 4   | 5.7 | 4   | 2   | 1.3 |
| 1p32.3   | chr1:55066001-55537749   | 0.040468   | 0.313      | 5.7 | 4   | 4.7 | 2 | 2   | 2   | 2.7 | 1.3 | 2 | 2   | 2   | 2   | 2 | 2   | 4   | 2   | 1.3 | 4   | 2 | 2   | 5   | 2 | 2 | 3   | 5.7 | 5   | 2   | 1.3 |
| 1p34.1   | chr1:39733501-46087499   | 0.0013974  | 0.22173    | 5.7 | 5.7 | 4.7 | 2 | 2   | 4   | 4   | 2.7 | 2 | 2   | 2   | 2   | 2 | 2   | 4   | 2   | 1.3 | 5   | 2 | 2   | 5   | 4 | 2 | 2   | 5.7 | 4   | 2   | 1.3 |
| 1p36.13  | chr1:12515501-35449499   | 0.0032655  | 0.095809   | 5.7 | 4   | 4.7 | 2 | 2   | 2   | 2.7 | 2.7 | 2 | 2   | 2   | 2   | 2 | 2   | 4.7 | 4   | 1.3 | 4   | 2 | 2   | 5   | 4 | 2 | 4   | 5.7 | 4   | 2   | 1.3 |
| 1p36.33  | chr1:1-6579499           | 0.00015895 | 0.0036776  | 5.7 | 4   | 5.7 | 3 | 2   | 2   | 2.7 | 2.7 | 2 | 5   | 2   | 3   | 2 | 2   | 5.7 | 2   | 1.3 | 5.7 | 2 | 2   | 5.7 | 2 | 2 | 2   | 5.7 | 5.7 | 2   | 1.3 |
| 1q21.1   | chr1:114353501-153974249 | 0.00010976 | 0.20241    | 5   | 5   | 3.3 | 2 | 2   | 4   | 3.3 | 2.7 | 2 | 5.7 | 2   | 2   | 5 | 2   | 1.3 | 3   | 2   | 4   | 2 | 2   | 2   | 4 | 2 | 4   | 5.7 | 5   | 4   | 2.7 |
| 1q21.3   | chr1:154232001-155308249 | 8.49E-08   | 0.00069826 | 5.7 | 5.7 | 5.7 | 2 | 2   | 4   | 3.3 | 2.7 | 2 | 4   | 2   | 3   | 2 | 2   | 5.3 | 3   | 1.3 | 5.7 | 2 | 2   | 5   | 4 | 2 | 4   | 5.7 | 5   | 4   | 2.7 |
| 1q23.3   | chr1:155899001-165620499 | 2.65E-05   | 0.035463   | 4   | 4   | 4   | 2 | 2   | 4   | 3.3 | 2.7 | 2 | 5   | 2   | 3   | 3 | 2   | 2.7 | 4   | 1.3 | 4   | 2 | 3   | 5   | 4 | 2 | 4   | 5.7 | 4   | 4   | 2.7 |
| 1q32.1   | chr1:200841501-207287749 | 0.00017586 | 0.043267   | 5.7 | 4   | 5.3 | 2 | 2   | 4   | 3.3 | 3.3 | 2 | 2   | 2   | 2   | 2 | 4   | 4   | 2.7 | 4   | 2   | 2 | 5   | 4   | 2 | 3 | 5.7 | 4   | 3   | 2.7 |     |
| 1q32.2   | chr1:207974251-209964249 | 6.45E-05   | 0.010484   | 5   | 5.7 | 5.3 | 2 | 2   | 4   | 3.3 | 2.7 | 2 | 2   | 2   | 2   | 2 | 4   | 4   | 2.7 | 5   | 2   | 2 | 5   | 4   | 2 | 3 | 5.7 | 4   | 3   | 2.7 |     |
| 1q42.13  | chr1:227919751-228871999 | 0.004859   | 0.01883    | 5.7 | 4   | 5.7 | 2 | 2   | 2   | 4.7 | 2.7 | 2 | 2   | 2   | 2   | 2 | 2   | 5.7 | 2   | 2.7 | 4   | 2 | 2   | 5.7 | 2 | 2 | 2   | 4   | 5.7 | 2   | 1.3 |
| 1q44     | chr1:247485251-249250621 | 0.02849    | 0.06218    | 4   | 4   | 3.3 | 2 | 2   | 4   | 3.3 | 1.3 | 2 | 2   | 3   | 2   | 2 | 2   | 2.7 | 4   | 2.7 | 5.7 | 2 | 2   | 2   | 4 | 2 | 4   | 3   | 4   | 2   | 2.7 |
| 20p13    | chr20:1-2842249          | 0.00022291 | 0.00032368 | 5.7 | 5   | 4.7 | 2 | 2   | 4   | 3.3 | 2.7 | 2 | 2   | 2   | 2   | 2 | 2   | 4.7 | 4   | 1.3 | 4   | 2 | 2   | 5   | 4 | 2 | 4   | 5.7 | 5.7 | 3   | 1.3 |
| 20p13    | chr20:3626501-4765249    | 0.0095186  | 0.012932   | 5.7 | 4   | 5.7 | 2 | 2   | 2   | 4   | 2.7 | 2 | 2   | 2   | 2   | 2 | 2   | 5.7 | 2   | 1.3 | 5   | 2 | 2   | 5   | 2 | 2 | 2   | 5.7 | 5.7 | 2   | 1.3 |
| 20q11.21 | chr20:21491751-34295999  | 0.016502   | 0.025607   | 5.7 | 5.7 | 4.7 | 2 | 2   | 2   | 4.7 | 2   | 2 | 2   | 2   | 3   | 2 | 2   | 4   | 3   | 1.3 | 4   | 2 | 2   | 4   | 3 | 2 | 2   | 5.7 | 5   | 3   | 1.3 |
| 20q13.12 | chr20:44438751-45012249  | 0.00041796 | 0.0011596  | 5.7 | 5.7 | 5.7 | 2 | 2   | 4   | 4   | 2.7 | 2 | 2   | 2   | 3   | 2 | 2   | 5.3 | 2   | 1.3 | 5   | 2 | 2   | 4   | 4 | 2 | 4   | 5.7 | 5.7 | 2   | 1.3 |
| 20q13.33 | chr20:60881751-60887999  | 2.10E-05   | 4.80E-05   | 5.7 | 4   | 5.3 | 3 | 2   | 2   | 3.3 | 2.7 | 2 | 5   | 2   | 5   | 1 | 2   | 5.7 | 2   | 1.3 | 5.7 | 3 | 2   | 5.7 | 2 | 2 | 2   | 5.7 | 5.7 | 3   | 1.3 |
| 21q22.11 | chr21:31743501-32490749  | 0.016166   | 0.016166   | 4   | 4   | 3.3 | 2 | 3   | 4   | 3.3 | 2.7 | 2 | 2   | 2   | 2   | 4 | 2.7 | 4   | 2.7 | 4   | 2   | 2 | 3   | 4   | 2 | 2 | 4   | 4   | 4   | 2.7 |     |
| 21q22.3  | chr21:45501751-47614749  | 0.0003657  | 0.0003657  | 5.7 | 4   | 5.3 | 2 | 2   | 2   | 2.7 | 2.7 | 2 | 2   | 2   | 5.7 | 1 | 1   | 5.7 | 2   | 1.3 | 5.7 | 2 | 2   | 5.7 | 2 | 2 | 2   | 5.7 | 5.7 | 3   | 1.3 |
| 22q12.2  | chr22:30642251-31743249  | 0.057733   | 0.083824   | 5.7 | 4   | 5.7 | 2 | 2   | 4   | 4   | 2.7 | 2 | 2   | 2   | 3   | 2 | 2   | 5.3 | 2   | 1.3 | 5   | 2 | 2   | 5   | 3 | 2 | 2   | 5.7 | 5.7 | 2   | 1.3 |
| 22q12.3  | chr22:36592751-38884249  | 0.047739   | 0.095018   | 5.7 | 5   | 5.3 | 2 | 2   | 4   | 2.7 | 2.7 | 2 | 2   | 2   | 2   | 2 | 2   | 5.7 | 4   | 1.3 | 4   | 2 | 2   | 5   | 3 | 2 | 2   | 5.7 | 5.7 | 2   | 2.7 |
| 22q13.1  | chr22:39066251-39120499  | 0.0062965  | 0.0084111  | 5.7 | 5   | 4.7 | 2 | 2   | 2   | 2.7 | 2.7 | 2 | 2   | 2   | 2   | 2 | 2   | 4.7 | 2   | 1.3 | 4   | 2 | 2   | 5.7 | 5 | 2 | 5   | 5.7 | 5.7 | 5   | 2   |
| 22q13.33 | chr22:50925751-51304566  | 2.76E-06   | 2.76E-06   | 5.7 | 5   | 5.7 | 2 | 2   | 4   | 4   | 2.7 | 2 | 4   | 2   | 4   | 2 | 2   | 5.7 | 2   | 1.3 | 5.7 | 4 | 2   | 5.7 | 5 | 2 | 4   | 5.7 | 5.7 | 4   | 1.3 |
| 2p11.2   | chr2:85042251-128479249  | 0.01962    | 0.1588     | 5.7 | 4   | 4.7 | 2 | 2   | 2   | 3.3 | 2.7 | 2 | 2   | 2   | 2   | 2 | 2   | 2.7 | 3   | 1.3 | 5   | 2 | 2   | 4   | 2 | 2 | 2   | 5.7 | 5.7 | 2   | 1.3 |
| 2p13.1   | chr2:74681751-74687499   | 8.64E-14   | 5.67E-13   | 5.7 | 5.7 | 5.7 | 2 | 2   | 4   | 4.7 | 4   | 3 | 5.7 | 2   | 4   | 2 | 2   | 5.7 | 4   | 1.3 | 5.7 | 4 | 4   | 4   | 4 | 2 | 4   | 5.7 | 5.7 | 4   | 1.3 |
| 2p23.3   | chr2:26851501-27682249   | 1.95E-06   | 1.95E-06   | 5.7 | 5   | 5.3 | 3 | 2   | 4   | 3.3 | 3.3 | 2 | 2   | 2   | 3   | 2 | 2   | 4.7 | 4   | 1.3 | 4   | 2 | 2   | 5   | 4 | 2 | 3   | 5.7 | 5.7 | 3   | 1.3 |
| 2q21.1   | chr2:130938251-133541999 | 0.00041796 | 0.00089881 | 5.7 | 5   | 5.7 | 2 | 2   | 2   | 4   | 2.7 | 2 | 2   | 2   | 2   | 2 | 2   | 5.7 | 2   | 1.3 | 5.7 | 2 | 2   | 2   | 2 | 2 | 4   | 5   | 5.7 | 4   | 1.3 |

|         |                          |            |            |     |     |     |     |   |   |     |     |   |     |   |     |   |     |     |     |     |     |     |     |     |     |   |     |     |     |     |     |
|---------|--------------------------|------------|------------|-----|-----|-----|-----|---|---|-----|-----|---|-----|---|-----|---|-----|-----|-----|-----|-----|-----|-----|-----|-----|---|-----|-----|-----|-----|-----|
| 2q31.1  | chr2:176946001-177054499 | 0.016502   | 0.051106   | 5.7 | 2   | 5.7 | 2   | 2 | 2 | 1.3 | 2   | 2 | 4   | 2 | 2   | 2 | 4   | 5.7 | 2   | 1.3 | 5.7 | 2   | 3   | 0.7 | 2   | 2 | 2   | 2   | 5.7 | 2   | 3.3 |
| 2q32.1  | chr2:179643501-197854249 | 0.033529   | 0.093625   | 2   | 2   | 1.3 | 1   | 2 | 2 | 1.3 | 4   | 2 | 3   | 2 | 4   | 4 | 5   | 1.3 | 4   | 3.3 | 5   | 5.7 | 2   | 0.7 | 2   | 1 | 4   | 2   | 2   | 2   | 3.3 |
| 2q35    | chr2:220045001-220115749 | 8.64E-14   | 7.07E-13   | 5.7 | 5.7 | 5.7 | 2   | 2 | 4 | 4   | 2.7 | 2 | 4   | 2 | 4   | 4 | 3   | 5.3 | 4   | 2   | 5.7 | 4   | 5.7 | 5   | 4   | 2 | 5   | 5.7 | 5.7 | 3   | 1.3 |
| 2q35    | chr2:217524751-219301999 | 0.01135    | 0.034747   | 5.7 | 4   | 4.7 | 2   | 2 | 2 | 3.3 | 2.7 | 2 | 3   | 2 | 2   | 2 | 3   | 4.7 | 2   | 1.3 | 5   | 2   | 2   | 1   | 2   | 2 | 2   | 5.7 | 5.7 | 2   | 1.3 |
| 2q37.3  | chr2:238977251-243199373 | 0.00078684 | 0.0052508  | 5.7 | 4   | 5.7 | 2   | 2 | 2 | 2.7 | 2.7 | 2 | 2   | 2 | 2   | 2 | 2   | 5.7 | 2   | 1.3 | 5.7 | 2   | 2   | 5.7 | 3   | 2 | 2   | 5.7 | 5.7 | 2   | 1.3 |
| 3p21.1  | chr3:52810751-52867499   | 0.0026245  | 0.05014    | 5.7 | 4   | 5.7 | 2   | 2 | 2 | 3.3 | 2.7 | 2 | 2   | 2 | 2   | 2 | 5.3 | 2   | 1.3 | 5   | 3   | 2   | 5.7 | 2   | 2   | 2 | 4   | 5.7 | 2   | 1.3 |     |
| 3p21.31 | chr3:50152751-50431499   | 8.66E-05   | 0.0031631  | 5.7 | 4   | 5.7 | 2   | 2 | 2 | 4   | 2.7 | 2 | 5   | 2 | 2   | 2 | 5.3 | 2   | 1.3 | 5   | 2   | 2   | 5.7 | 3   | 2   | 2 | 5.7 | 5.7 | 2   | 1.3 |     |
| 3p22.2  | chr3:38016501-38739999   | 0.00064955 | 0.010339   | 5.7 | 5   | 3.3 | 2   | 2 | 4 | 2.7 | 2.7 | 2 | 2   | 2 | 3   | 2 | 2   | 4.7 | 4   | 1.3 | 4   | 2   | 2   | 5   | 3   | 2 | 3   | 5.7 | 4   | 2   | 2.7 |
| 3p25.3  | chr3:4941751-9991999     | 0.00010976 | 0.00098397 | 5.7 | 4   | 4   | 2   | 2 | 4 | 2.7 | 2.7 | 2 | 2   | 2 | 4   | 2 | 2   | 4   | 2   | 1.3 | 5.7 | 2   | 2   | 5   | 3   | 2 | 3   | 5.7 | 5.7 | 4   | 1.3 |
| 3q21.3  | chr3:125724751-129512999 | 0.002206   | 0.002206   | 5.7 | 4   | 4.7 | 2   | 2 | 2 | 2.7 | 2.7 | 2 | 2   | 2 | 2   | 4 | 2   | 4.7 | 2   | 1.3 | 4   | 2   | 2   | 5.7 | 2   | 2 | 2   | 5.7 | 5.7 | 3   | 1.3 |
| 3q27.1  | chr3:183894501-184081499 | 3.69E-09   | 3.69E-09   | 5.7 | 5.7 | 5.3 | 2   | 2 | 4 | 4   | 2.7 | 2 | 4   | 2 | 4   | 2 | 2   | 5.3 | 4   | 1.3 | 5.7 | 2   | 2   | 5.7 | 4   | 2 | 3   | 5.7 | 5.7 | 4   | 2   |
| 4p16.1  | chr4:3213251-10117999    | 0.0095186  | 0.22057    | 5.7 | 4   | 4   | 5.7 | 2 | 2 | 2.7 | 2.7 | 2 | 2   | 2 | 2   | 2 | 2   | 5.3 | 2   | 1.3 | 4   | 2   | 2   | 4   | 2   | 2 | 2   | 4   | 5.7 | 2   | 2.7 |
| 4p16.3  | chr4:676251-1245249      | 1.48E-05   | 0.00037239 | 5.7 | 4   | 5.7 | 4   | 2 | 2 | 4   | 2.7 | 2 | 5   | 2 | 2   | 2 | 2   | 5.7 | 2   | 1.3 | 5.7 | 2   | 2   | 5.7 | 2   | 2 | 2   | 5.7 | 5.7 | 2   | 1.3 |
| 4q21.1  | chr4:77659251-77941999   | 0.01962    | 0.01962    | 5.7 | 4   | 4.7 | 2   | 2 | 2 | 4   | 1.3 | 2 | 2   | 2 | 2   | 2 | 2   | 4   | 2   | 2.7 | 5   | 2   | 2   | 1   | 4   | 2 | 3   | 4   | 4   | 4   | 2.7 |
| 5p15.33 | chr5:1-3601249           | 0.0021115  | 0.0021115  | 5.7 | 4   | 4   | 2   | 2 | 3 | 3.3 | 2   | 2 | 3   | 2 | 3   | 1 | 2   | 4   | 4   | 1.3 | 5   | 3   | 2   | 1   | 4   | 2 | 2   | 5.7 | 5.7 | 3   | 1.3 |
| 5q31.1  | chr5:131704751-131823999 | 4.99E-06   | 5.34E-05   | 5.7 | 5.7 | 4.7 | 2   | 2 | 4 | 4   | 2.7 | 2 | 4   | 2 | 2   | 2 | 3   | 4   | 4   | 1.3 | 4   | 2   | 4   | 4   | 4   | 2 | 2   | 5.7 | 5.7 | 3   | 2.7 |
| 5q31.3  | chr5:139926501-140044749 | 4.57E-09   | 6.70E-08   | 5.7 | 5.7 | 5.7 | 2   | 2 | 4 | 4   | 4   | 2 | 5   | 2 | 4   | 2 | 2   | 4   | 3   | 1.3 | 5   | 3   | 2   | 4   | 5   | 2 | 4   | 5.7 | 5.7 | 4   | 2.7 |
| 5q33.1  | chr5:148044251-157158249 | 1.40E-06   | 1.28E-05   | 5.7 | 5   | 5.7 | 2   | 2 | 4 | 4   | 2.7 | 2 | 2   | 3 | 3   | 2 | 2   | 4   | 5   | 1.3 | 4   | 2   | 2   | 4   | 4   | 2 | 4   | 5.7 | 5.7 | 4   | 2.7 |
| 5q35.3  | chr5:180582001-180915260 | 3.82E-07   | 7.63E-05   | 5.7 | 5.7 | 5.7 | 2   | 2 | 4 | 2.7 | 2.7 | 2 | 5   | 2 | 4   | 2 | 2   | 5.7 | 2   | 1.3 | 4   | 2   | 2   | 5   | 4   | 2 | 4   | 5.7 | 5.7 | 4   | 1.3 |
| 5q35.3  | chr5:176792001-177020999 | 3.15E-07   | 8.66E-05   | 5.7 | 5.7 | 5.7 | 2   | 2 | 3 | 4   | 4   | 2 | 4   | 2 | 4   | 2 | 2   | 5.7 | 3   | 1.3 | 5.7 | 3   | 2   | 5   | 4   | 2 | 2   | 5.7 | 5.7 | 2   | 1.3 |
| 6p12.2  | chr6:52008251-52147249   | 0.047739   | 0.10564    | 2   | 2   | 1.3 | 1   | 2 | 4 | 1.3 | 2   | 2 | 2   | 2 | 5.7 | 2 | 3   | 1.3 | 5.7 | 2.7 | 2   | 2   | 2   | 1   | 5.7 | 2 | 5.7 | 5.7 | 2   | 2   | 2.7 |
| 6p21.1  | chr6:42857501-43492749   | 1.48E-05   | 0.001189   | 5.7 | 5.7 | 4.7 | 2   | 2 | 4 | 4   | 2.7 | 2 | 3   | 2 | 2   | 2 | 2   | 5.3 | 2   | 1.3 | 5   | 2   | 2   | 5.7 | 4   | 2 | 4   | 5.7 | 5.7 | 4   | 1.3 |
| 6p21.1  | chr6:39023501-42233249   | 0.00035298 | 0.0042079  | 5.7 | 5   | 5.3 | 2   | 2 | 4 | 3.3 | 2.7 | 2 | 2   | 2 | 2   | 2 | 2   | 4   | 2   | 1.3 | 4   | 2   | 2   | 5.7 | 4   | 2 | 4   | 5.7 | 5.7 | 4   | 2   |
| 6p21.1  | chr6:43590751-44311499   | 0.00073731 | 0.020845   | 5.7 | 4   | 5.3 | 2   | 2 | 4 | 3.3 | 2.7 | 2 | 4   | 2 | 2   | 2 | 2   | 4.7 | 2   | 1.3 | 5   | 2   | 2   | 1   | 2   | 2 | 4   | 5.7 | 5.7 | 2   | 2   |
| 6p21.32 | chr6:32797001-32943249   | 8.64E-14   | 3.57E-09   | 5.7 | 5.7 | 5.3 | 2   | 2 | 4 | 4   | 4   | 2 | 5.7 | 2 | 4   | 3 | 3   | 5.3 | 4   | 2   | 5   | 4   | 3   | 5   | 5.7 | 2 | 5.7 | 5.7 | 5.7 | 4   | 2.7 |
| 6p21.33 | chr6:31087501-32190999   | 1.59E-08   | 0.019265   | 5.7 | 5.7 | 4.7 | 2   | 2 | 4 | 4   | 3.3 | 2 | 4   | 2 | 4   | 2 | 2   | 4.7 | 4   | 1.3 | 5.7 | 4   | 2   | 5.7 | 4   | 2 | 3   | 5.7 | 5.7 | 4   | 2.7 |
| 6p22.1  | chr6:29363751-30916499   | 8.49E-08   | 0.0086509  | 5.7 | 5.7 | 4.7 | 2   | 2 | 4 | 4   | 3.3 | 2 | 2   | 2 | 4   | 2 | 2   | 4   | 5   | 2.7 | 5   | 2   | 2   | 5.7 | 5.7 | 2 | 4   | 5.7 | 5   | 4   | 2.7 |
| 6p22.2  | chr6:25983001-27115749   | 4.57E-09   | 3.40E-06   | 4   | 5.7 | 4.7 | 2   | 2 | 4 | 4.7 | 2.7 | 2 | 5.7 | 2 | 2   | 5 | 2   | 4.7 | 4   | 2.7 | 4   | 2   | 4   | 5.7 | 4   | 2 | 5   | 5.7 | 5   | 4   | 2.7 |
| 6q21    | chr6:109786001-109787499 | 0.0032655  | 0.0032655  | 4   | 5.7 | 5.7 | 1   | 2 | 2 | 4   | 2.7 | 2 | 3   | 2 | 2   | 2 | 3   | 4.7 | 2   | 1.3 | 5.7 | 2   | 2   | 1   | 2   | 2 | 2   | 5.7 | 5.7 | 2   | 2   |
| 7p13    | chr7:41728501-47481749   | 0.00014941 | 0.0045717  | 5.7 | 5   | 4.7 | 2   | 2 | 3 | 4   | 2.7 | 2 | 3   | 2 | 4   | 3 | 2   | 5.3 | 2   | 1.3 | 4   | 2   | 2   | 2   | 3   | 2 | 2   | 5.7 | 5.7 | 4   | 1.3 |
| 7p15.2  | chr7:27146751-27570999   | 0.00053207 | 0.017357   | 4   | 4   | 3.3 | 3   | 2 | 3 | 2.7 | 2.7 | 2 | 4   | 2 | 4   | 2 | 2   | 5.7 | 2   | 2   | 4   | 2   | 2   | 1   | 4   | 2 | 3   | 5   | 5.7 | 4   | 2.7 |
| 7p22.3  | chr7:1-5663749           | 0.0003657  | 0.0003657  | 5.7 | 4   | 5.7 | 4   | 2 | 2 | 2.7 | 2.7 | 2 | 4   | 2 | 2   | 2 | 2   | 5.7 | 2   | 1.3 | 4   | 2   | 2   | 5.7 | 2   | 2 | 2   | 5.7 | 5.7 | 2   | 1.3 |
| 7q22.1  | chr7:99685751-100006499  | 2.24E-08   | 2.24E-08   | 5.7 | 5   | 4.7 | 2   | 2 | 4 | 4   | 2.7 | 2 | 4   | 2 | 4   | 2 | 2   | 5.7 | 4   | 1.3 | 5.7 | 2   | 2   | 5.7 | 2   | 2 | 4   | 5.7 | 5.7 | 4   | 1.3 |
| 7q32.1  | chr7:128469751-128586749 | 0.00011734 | 0.0061524  | 5.7 | 4   | 4.7 | 2   | 2 | 3 | 3.3 | 2   | 2 | 2   | 2 | 4   | 2 | 2   | 5.7 | 2   | 1.3 | 5.7 | 2   | 2   | 5.7 | 2   | 2 | 2   | 5.7 | 5.7 | 4   | 1.3 |
| 7q34    | chr7:142205751-142498749 | 8.05E-13   | 8.50E-06   | 5.7 | 5.7 | 4.7 | 2   | 2 | 4 | 4   | 3.3 | 2 | 2   | 2 | 5   | 2 | 2   | 4   | 4   | 1.3 | 5.7 | 3   | 5   | 5.7 | 5.7 | 3 | 5   | 5.7 | 5.7 | 4   | 2.7 |
| 7q36.1  | chr7:150163001-150492249 | 1.48E-11   | 7.70E-05   | 5.7 | 4   | 5.7 | 2   | 2 | 4 | 4   | 3.3 | 2 | 4   | 2 | 4   | 4 | 2   | 5.7 | 2   | 1.3 | 5.7 | 3   | 3   | 5.7 | 4   | 2 | 5   | 5.7 | 5.7 | 4   | 2.7 |
| 8p11.21 | chr8:41475501-41791999   | 0.040468   | 0.068293   | 5.7 | 5   | 4.7 | 2   | 2 | 4 | 3.3 | 2   | 2 | 2   | 2 | 2   | 2 | 2   | 4.7 | 2   | 2   | 2   | 2   | 3   | 1   | 2   | 2 | 2   | 5   | 5.7 | 2   | 1.3 |
| 8p21.2  | chr8:26362001-27528749   | 0.13026    | 0.21685    | 5.7 | 4   | 4.7 | 2   | 2 | 2 | 4   | 2   | 2 | 2   | 2 | 2   | 2 | 2   | 4   | 2   | 1.3 | 4   | 2   | 2   | 1   | 2   | 2 | 2   | 5   | 5   | 2   | 1.3 |
| 8p21.3  | chr8:22431251-22460999   | 0.0013974  | 0.0020625  | 5.7 | 4   | 5.7 | 2   | 2 | 2 | 4   | 4   | 2 | 2   | 2 | 2   | 2 | 5.3 | 2   | 1.3 | 4   | 2   | 2   | 5.7 | 2   | 2   | 2 | 5.7 | 5.7 | 2   | 1.3 |     |
| 8p23.1  | chr8:10386251-11710999   | 0.0288     | 0.0288     | 5.7 | 3   | 4.7 | 2   | 2 | 2 | 4   | 2   | 2 | 2   | 2 | 2   | 2 | 2   | 4   | 2   | 1.3 | 5.7 | 2   | 2   | 5.7 | 2   | 2 | 2   | 5.7 | 5   | 4   | 1.3 |
| 8q24.22 | chr8:133898751-134251249 | 0.0017757  | 0.010353   | 4   | 5.7 | 4.7 | 2   | 2 | 4 | 2.7 | 3.3 | 2 | 2   | 2 | 4   | 2 | 2   | 4   | 2   | 1.3 | 4   | 4   | 2   | 1   | 4   | 2 | 2   | 5.7 | 4   | 2   | 2.7 |
| 8q24.3  | chr8:144641251-144650499 | 2.10E-05   | 0.00016769 | 5.7 | 4   | 5.7 | 2   | 2 | 2 | 4   | 4   | 1 | 5   | 2 | 5   | 2 | 2   | 5.7 | 2   | 1.3 | 5.7 | 2   | 2   | 5.7 | 2   | 2 | 2   | 5.7 | 5.7 | 3   | 1.3 |
| 9p13.3  | chr9:35605001-35846749   | 1.42E-10   | 1.42E-10   | 5.7 | 5   | 5.7 | 2   | 2 | 4 | 4   | 3.3 | 2 | 5   | 2 | 4   | 2 | 2   | 4.7 | 4   | 1.3 | 5.7 | 4   | 3   | 5   | 5   | 2 | 4   | 5.7 | 5.7 | 4   | 2.7 |
| 9q22.31 | chr9:95781251-96847249   | 0.024164   | 0.024164   | 4   | 4   | 4.7 | 2   | 2 | 3 | 2.7 | 3.3 | 2 | 2   | 2 | 2   | 2 | 2   | 5.7 | 2   | 1.3 | 4   | 5   | 2   | 4   | 2   | 2 | 2   | 5   | 5.7 | 2   | 1.3 |
| 9q32    | chr9:116190751-117379749 | 5.19E-07   | 1.52E-05   | 5.7 | 4   | 4   | 2   | 2 | 4 | 4   | 4.7 | 2 | 2   | 2 | 4   | 2 | 2   | 5.7 | 4   | 1.3 | 5   | 2   | 2   | 5.7 | 4   | 2 | 4   | 5.7 | 5.7 | 4   | 2   |
| 9q34.11 | chr9:130473251-130890749 | 0.0003657  | 0.033118   | 5.7 | 5   | 4.7 | 2   | 2 | 2 | 3.3 | 2.7 | 2 | 4   | 2 | 5   | 2 | 2   | 5.3 | 2   | 1.3 | 5.7 | 2   | 2   | 5.7 | 2   | 2 | 2   | 5.7 | 5.7 | 2   | 1.3 |

|          |                           |            |            |     |     |     |     |   |   |     |     |   |   |   |   |   |   |     |   |     |     |   |   |     |   |   |   |     |     |   |     |
|----------|---------------------------|------------|------------|-----|-----|-----|-----|---|---|-----|-----|---|---|---|---|---|---|-----|---|-----|-----|---|---|-----|---|---|---|-----|-----|---|-----|
| 9q34.13  | chr9:134348001-134404749  | 4.92E-05   | 0.0095862  | 5.7 | 5.7 | 5.3 | 3   | 2 | 4 | 4   | 2.7 | 2 | 3 | 2 | 3 | 2 | 2 | 4.7 | 2 | 1.3 | 4   | 3 | 2 | 5.7 | 3 | 2 | 3 | 5.7 | 5.7 | 2 | 1.3 |
| 9q34.3   | chr9:139701251-140387499  | 1.48E-05   | 0.00064955 | 5.7 | 4   | 5.7 | 4   | 2 | 2 | 4   | 2.7 | 2 | 5 | 2 | 2 | 2 | 2 | 5.7 | 2 | 1.3 | 5.7 | 4 | 2 | 5.7 | 2 | 2 | 2 | 5.7 | 5.7 | 3 | 1.3 |
| 19p12    | chr19:19843751-21987999   | 1.17E-07   | 1.17E-07   | 2   | 1   | 1.3 | 2   | 2 | 1 | 1.3 | 1.3 | 2 | 2 | 2 | 1 | 2 | 2 | 1.3 | 1 | 1.3 | 1   | 2 | 2 | 5.7 | 1 | 2 | 2 | 1   | 2   | 2 | 1.3 |
| 1p32.3   | chr1:55530501-55681499    | 0.00041873 | 0.00041873 | 2   | 2   | 1.3 | 1   | 2 | 2 | 2   | 1.3 | 2 | 2 | 2 | 2 | 2 | 4 | 1.3 | 2 | 2.7 | 2   | 2 | 2 | 1   | 2 | 2 | 3 | 2   | 2   | 2 | 2.7 |
| 19p13.3  | chr19:1-362249            | 0.042472   | 0.042472   | 5.7 | 3   | 5.3 | 3   | 2 | 2 | 3.3 | 1.3 | 2 | 3 | 2 | 2 | 1 | 1 | 5.7 | 2 | 0.7 | 2   | 2 | 2 | 5.7 | 3 | 3 | 2 | 4   | 5.7 | 2 | 1.3 |
| 13q34    | chr13:109860251-110801499 | 0.077311   | 0.077311   | 2   | 4   | 3.3 | 2   | 2 | 2 | 2.7 | 2.7 | 1 | 2 | 2 | 2 | 2 | 2 | 4   | 2 | 1.3 | 4   | 3 | 2 | 1   | 2 | 2 | 2 | 4   | 2   | 2 | 2.7 |
| 17q25.3  | chr17:79304251-79476999   | 0.0791     | 0.077311   | 5.7 | 4   | 5.7 | 3   | 2 | 2 | 3.3 | 2.7 | 2 | 5 | 2 | 2 | 2 | 2 | 5.7 | 2 | 1.3 | 5.7 | 2 | 1 | 5.7 | 2 | 2 | 2 | 5.7 | 5.7 | 2 | 0.7 |
| 20q13.33 | chr20:58422751-58508999   | 0.13627    | 0.13627    | 4   | 4   | 2.7 | 0.7 | 1 | 3 | 2.7 | 2.7 | 2 | 2 | 2 | 5 | 2 | 3 | 3.3 | 2 | 2.7 | 4   | 5 | 2 | 0.7 | 2 | 1 | 2 | 5   | 4   | 2 | 4.7 |
| 2q32.1   | chr2:172341501-191513999  | 0.17316    | 0.17316    | 2   | 2   | 1.3 | 1   | 2 | 2 | 1.3 | 1.3 | 2 | 3 | 2 | 2 | 2 | 5 | 1.3 | 2 | 3.3 | 3   | 4 | 2 | 0.7 | 2 | 1 | 4 | 2   | 2   | 2 | 3.3 |
| 10q26.3  | chr10:134790001-135093249 | 0.17316    | 0.17316    | 5.7 | 3   | 5.7 | 3   | 2 | 2 | 3.3 | 2.7 | 2 | 4 | 2 | 2 | 1 | 2 | 5.7 | 2 | 1.3 | 5   | 2 | 1 | 5.7 | 2 | 2 | 1 | 4   | 5.7 | 2 | 1.3 |
| 16q12.2  | chr16:52119001-54317249   | 0.17316    | 0.17316    | 2   | 2   | 1.3 | 1   | 2 | 2 | 1.3 | 2   | 2 | 2 | 2 | 2 | 2 | 4 | 1.3 | 2 | 2.7 | 2   | 2 | 2 | 5.7 | 2 | 2 | 2 | 2   | 3   | 2 | 1.3 |
| 18q21.31 | chr18:54305751-54814499   | 0.18144    | 0.17316    | 2   | 2   | 1.3 | 2   | 2 | 2 | 1.3 | 1.3 | 2 | 2 | 2 | 2 | 2 | 3 | 1.3 | 2 | 2.7 | 2   | 2 | 2 | 2   | 2 | 2 | 2 | 2   | 2   | 2 | 1.3 |
| 12q24.33 | chr12:133783501-133851895 | 0.18144    | 0.18144    | 2   | 2   | 1.3 | 1   | 2 | 2 | 1.3 | 1.3 | 2 | 2 | 2 | 2 | 2 | 2 | 1.3 | 2 | 1.3 | 3   | 2 | 2 | 5.7 | 2 | 1 | 2 | 4   | 3   | 2 | 0.7 |
| 15q11.2  | chr15:25415751-25496249   | 0.18144    | 0.18144    | 4   | 2   | 2.7 | 4   | 2 | 2 | 1.3 | 1.3 | 2 | 2 | 2 | 1 | 2 | 2 | 2.7 | 2 | 1.3 | 2   | 2 | 2 | 2   | 2 | 2 | 2 | 2   | 2   | 2 | 0.7 |
| 19p13.2  | chr19:9405501-58992999    | 0.18144    | 0.18144    | 2   | 2   | 1.3 | 1   | 2 | 2 | 1.3 | 1.3 | 2 | 2 | 2 | 2 | 2 | 2 | 1.3 | 2 | 1.3 | 2   | 2 | 2 | 5.7 | 2 | 2 | 2 | 2   | 2   | 2 | 0.7 |
| 21q22.3  | chr21:46874751-46934749   | 0.18144    | 0.18144    | 5.7 | 4   | 5.3 | 2   | 2 | 2 | 2.7 | 2.7 | 2 | 2 | 2 | 2 | 1 | 1 | 5.7 | 2 | 1.3 | 5.7 | 2 | 2 | 5.7 | 2 | 2 | 2 | 5.7 | 5.7 | 3 | 1.3 |
| 22q13.1  | chr22:39928751-40139249   | 0.18144    | 0.18144    | 5.7 | 5   | 4.7 | 2   | 2 | 2 | 2.7 | 2.7 | 2 | 2 | 2 | 2 | 1 | 2 | 4.7 | 2 | 1.3 | 4   | 2 | 2 | 5.7 | 2 | 2 | 3 | 5.7 | 5.7 | 3 | 1.3 |
| 16q12.2  | chr16:1-90354753          | 0.17316    | 1          | 2   | 2   | 1.3 | 1   | 2 | 2 | 1.3 | 2   | 2 | 2 | 2 | 2 | 2 | 4 | 1.3 | 2 | 2.7 | 2   | 2 | 2 | 5.7 | 2 | 2 | 2 | 2   | 3   | 2 | 1.3 |
| 16q22.1  | chr16:1-90354753          | 0.18144    | 1          | 4   | 2   | 1.3 | 1   | 2 | 2 | 2.7 | 2   | 2 | 2 | 2 | 2 | 2 | 2 | 2.7 | 2 | 1.3 | 4   | 2 | 2 | 5.7 | 2 | 1 | 2 | 2   | 4   | 2 | 1.3 |

Copy number: >2, amplification; <2, deletion.

\*Based on NCBI human reference genome GRC Build 37 (hg19).



Supplementary Table 15. Loss of heterozygosity analysis of the 28 cases of NKTCL.

| Patient ID | Chromosome | Hugo_Symbol  | Start_position* | End_Position* | Nucleotide change | Protein Change | Copy number | Genotype |
|------------|------------|--------------|-----------------|---------------|-------------------|----------------|-------------|----------|
| 149        | X          | MAGEB6       | 26213093        | 26213093      | c.C1130T          | p.A377V        | 3           | AAA      |
| 149        | X          | GPC4         | 132437337       | 132437337     | c.C1325T          | p.A442V        | 3           | AAA      |
| 149        | 15         | USP8         | 50785055        | 50785055      | c.G2074C          | p.A692P        | 3           | AAA      |
| 149        | X          | MAGEC1       | 140996239       | 140996239     | c.G3049T          | p.E1017X       | 3           | AAA      |
| 149        | 11         | OR5R1        | 56185159        | 56185159      | c.T550C           | p.F184L        | 3           | AAA      |
| 149        | X          | SCML1        | 17771387        | 17771387      | c.G502A           | p.G168R        | 3           | AAA      |
| 149        | X          | MAGEB16      | 35820795        | 35820795      | c.A482G           | p.H161R        | 3           | AAA      |
| 149        | 15         | ATP8B4       | 50226313        | 50226313      | c.C1354A          | p.H452N        | 3           | AAA      |
| 149        | X          | KIAA1210     | 118222360       | 118222360     | c.A2833T          | p.I945F        | 3           | AAA      |
| 149        | 19         | LOC100379224 | 44612231        | 44612231      | c.A1918G          | p.K640E        | 2           | AA       |
| 149        | X          | SPANXC       | 140785696       | 140785696     | c.A220G           | p.K74E         | 3           | AAA      |
| 149        | 3          | ULK4         | 41756986        | 41756986      | c.T2530A          | p.L844M        | 3           | AAA      |
| 149        | 19         | LOC100379224 | 44610665        | 44610665      | c.A352G           | p.M118V        | 2           | AA       |
| 149        | 6          | OR14J1       | 29274486        | 29274486      | c.T20C            | p.M7T          | 3           | AAA      |
| 149        | 15         | USP8         | 50784955        | 50784955      | c.C1974A          | p.N658K        | 3           | AAA      |
| 149        | 2          | TTN          | 179458591       | 179458591     | c.G31241A         | p.R10414H      | 5           | AAAAA    |
| 149        | 16         | MC1R         | 89986154        | 89986154      | c.G488A           | p.R163Q        | 2           | AA       |
| 149        | 15         | USP8         | 50784950        | 50784950      | c.C1969T          | p.R657W        | 3           | AAA      |
| 149        | 17         | FOXN1        | 26851602        | 26851602      | c.C205T           | p.R69C         | 2           | AA       |
| 149        | 17         | KRTAP29-1    | 39458893        | 39458893      | c.C211T           | p.R71C         | 3           | AAA      |
| 149        | 17         | KRTAP16-1    | 39464736        | 39464736      | c.G770C           | p.S257T        | 3           | AAA      |
| 149        | X          | CXorf67      | 51150032        | 51150032      | c.C164T           | p.S55L         | 3           | AAA      |
| 149        | 17         | C17orf77     | 72588326        | 72588326      | c.T16G            | p.S6A          | 2           | AA       |
| 149        | 3          | TOP2B        | 25646268        | 25646268      | c.C4457T          | p.T1486M       | 4           | AAAA     |
| 149        | 6          | NKAPL        | 28227604        | 28227604      | c.C455A           | p.T152N        | 3           | AAA      |
| 149        | 16         | CENPBD1      | 90037828        | 90037828      | c.C503T           | p.T168I        | 2           | AA       |
| 149        | 6          | OR2J2        | 29142064        | 29142064      | c.A652G           | p.T218A        | 3           | AAA      |
| 149        | 6          | NKAPL        | 28227436        | 28227436      | c.A287G           | p.Y96C         | 3           | AAA      |
| 151        | 3          | ZNF197       | 44683542        | 44683542      | c.C920T           | p.A307V        | 3           | AAA      |
| 151        | X          | DMD          | 32503194        | 32503194      | c.A2621G          | p.D874G        | 2           | AA       |
| 151        | 2          | TTN          | 179398509       | 179398509     | c.G75638T         | p.G25213V      | 3           | AAA      |
| 151        | 12         | OR10A7       | 55615094        | 55615094      | c.G286A           | p.G96S         | 3           | AAA      |
| 151        | 12         | FAM186A      | 50727706        | 50727706      | c.C6684G          | p.H2228Q       | 2           | AA       |
| 151        | X          | RP11-87M18.2 | 36403036        | 36403036      | c.A1817G          | p.H606R        | 2           | AA       |
| 151        | 2          | TTN          | 179404628       | 179404628     | c.A70969T         | p.I23657F      | 3           | AAA      |
| 151        | 22         | PI4KA        | 21161673        | 21161673      | c.G1145A          | p.R382H        | 2           | AA       |
| 151        | X          | DMD          | 32380996        | 32380996      | c.G1211A          | p.R404H        | 2           | AA       |
| 151        | 12         | ANKRD52      | 56639301        | 56639301      | c.G2264C          | p.R755P        | 3           | AAA      |
| 151        | 5          | PCDHA5       | 140249527       | 140249527     | c.C839T           | p.S280F        | 3           | AAA      |
| 151        | 3          | GNL3         | 52727257        | 52727257      | c.G1099A          | p.V367M        | 3           | AAA      |
| 3324       | 21         | KRTAP11-1    | 32253513        | 32253513      | c.T331A           | p.C111S        | 3           | AAA      |
| 3324       | 4          | FAM47E-STBD  | 77192868        | 77192868      | c.G817A           | p.E273K        | 3           | AAA      |
| 3324       | X          | NHS          | 17744510        | 17744510      | c.T1690G          | p.F564V        | 3           | AAA      |
| 3324       | X          | DDX3X        | 41204711        | 41204711      | c.G1177A          | p.G393S        | 3           | AAA      |

|      |    |          |           |           |           |          |   |           |
|------|----|----------|-----------|-----------|-----------|----------|---|-----------|
| 3324 | 3  | KBTBD12  | 127641968 | 127641968 | c.C64A    | p.Q22K   | 2 | AA        |
| 3325 | 20 | ZNF831   | 57768743  | 57768743  | c.C2669T  | p.A890V  | 3 | AAA       |
| 3326 | X  | HDHD1    | 6975782   | 6975782   | c.G593C   | p.C198S  | 2 | AA        |
| 3326 | 19 | DMKN     | 36004171  | 36004171  | c.G207T   | p.E69D   | 2 | AA        |
| 3326 | 17 | PYY      | 42030531  | 42030531  | c.C215G   | p.T72R   | 3 | AAA       |
| 3327 | X  | FAM47C   | 37026830  | 37026830  | c.C347T   | p.A116V  | 3 | AAA       |
| 3327 | X  | REPS2    | 17086525  | 17086525  | c.A1207G  | p.K403E  | 3 | AAA       |
| 3327 | X  | ATRX     | 76931736  | 76931736  | c.A3680G  | p.N1227S | 3 | AAA       |
| 3327 | 10 | WNT8B    | 102240866 | 102240866 | c.G353T   | p.R118L  | 2 | AA        |
| 3327 | 19 | HMHA1    | 1068738   | 1068738   | c.G464A   | p.R155H  | 2 | AA        |
| 3327 | 2  | DES      | 220283420 | 220283420 | c.C236T   | p.T79M   | 3 | AAA       |
| 3327 | X  | RGAG1    | 109693960 | 109693960 | c.G115A   | p.V39I   | 3 | AAA       |
| 3329 | X  | MAGEC1   | 140993875 | 140993875 | c.G685C   | p.A229P  | 3 | AAA       |
| 3329 | X  | BEND2    | 18230715  | 18230715  | c.T462G   | p.F154L  | 2 | AA        |
| 3329 | 19 | MUC16    | 9058907   | 9058907   | c.C28539G | p.H9513Q | 4 | AAAA      |
| 3329 | 22 | TRIOBP   | 38121152  | 38121152  | c.C2589A  | p.N863K  | 3 | AAA       |
| 3329 | X  | ZMAT1    | 101139254 | 101139254 | c.C1145A  | p.P382Q  | 3 | AAA       |
| 3329 | 19 | MUC16    | 9076083   | 9076083   | c.C11363T | p.T3788I | 4 | AAAA      |
| 3336 | 9  | NOTCH1   | 139409115 | 139409115 | c.A2054C  | p.N685T  | 5 | AAAAA     |
| 3336 | 6  | SYNJ2    | 158497754 | 158497754 | c.A1678C  | p.T560P  | 2 | AA        |
| 3337 | 5  | LHFPL2   | 77784941  | 77784941  | c.G466T   | p.A156S  | 1 | A         |
| 3337 | X  | NKRF     | 118723880 | 118723880 | c.C1508T  | p.A503V  | 1 | A         |
| 3337 | 2  | KCNH7    | 163280034 | 163280034 | c.G1945T  | p.A649S  | 1 | A         |
| 3337 | 7  | RSBN1L   | 77407690  | 77407690  | c.G1829T  | p.C610F  | 1 | A         |
| 3337 | 4  | FAT4     | 126370253 | 126370253 | c.C8088A  | p.D2696E | 1 | A         |
| 3337 | 4  | BOD1L1   | 13588088  | 13588088  | c.G8365T  | p.D2789Y | 1 | A         |
| 3337 | 2  | PUS10    | 61180157  | 61180157  | c.A1283G  | p.D428G  | 1 | A         |
| 3337 | 4  | TIGD2    | 90034606  | 90034606  | c.G481T   | p.E161X  | 1 | A         |
| 3337 | 5  | CMYA5    | 79025711  | 79025711  | c.G1123A  | p.E375K  | 1 | A         |
| 3337 | 6  | HTR1B    | 78172216  | 78172216  | c.A905T   | p.K302M  | 1 | A         |
| 3337 | 7  | CTTNBP2  | 117450848 | 117450848 | c.C385A   | p.L129M  | 1 | A         |
| 3337 | 2  | NRXN1    | 50847258  | 50847258  | c.C1222A  | p.L408M  | 1 | A         |
| 3337 | 5  | PDE4D    | 59189315  | 59189315  | c.G135T   | p.Q45H   | 1 | A         |
| 3337 | 4  | BMP2K    | 79793795  | 79793795  | c.C1636A  | p.Q546K  | 1 | A         |
| 3337 | 8  | DPYS     | 105456535 | 105456535 | c.A734G   | p.Y245C  | 1 | A         |
| 8184 | X  | HDHD1    | 6975782   | 6975782   | c.G593C   | p.C198S  | 4 | AAAA      |
| 8184 | 2  | RTP5     | 242814009 | 242814009 | c.G302A   | p.G101E  | 9 | AAAAAAAAA |
| 8184 | X  | RBMXL3   | 114425400 | 114425400 | c.G1396A  | p.G466R  | 4 | AAAA      |
| 8184 | 17 | KRTAP9-1 | 39346518  | 39346518  | c.T380C   | p.I127T  | 8 | AAAAAAAAA |
| 8184 | 17 | KRTAP4-7 | 39240819  | 39240819  | c.C361G   | p.L121V  | 8 | AAAAAAAAA |
| 8184 | 2  | UNC80    | 210824272 | 210824272 | c.G7448A  | p.R2483Q | 3 | AAA       |
| 8184 | 8  | CYP11B1  | 143961102 | 143961102 | c.G128A   | p.R43Q   | 9 | AAAAAAAAA |
| 8186 | 15 | MAP1A    | 43818052  | 43818052  | c.G4381A  | p.D1461N | 2 | AA        |
| 8186 | X  | ARMCX4   | 100749127 | 100749127 | c.A5551G  | p.I1851V | 2 | AA        |
| 8186 | 6  | TREML4   | 41196605  | 41196605  | c.T217C   | p.W73R   | 2 | AA        |
| 8188 | 19 | ZNF568   | 37487873  | 37487873  | c.C1088A  | p.A363E  | 2 | AA        |
| 8188 | 6  | MUC21    | 30955179  | 30955179  | c.G1227C  | p.E409D  | 2 | AA        |
| 8188 | 5  | SH3RF2   | 145442203 | 145442203 | c.G2129C  | p.G710A  | 3 | AAA       |

|      |    |         |           |           |           |           |   |        |
|------|----|---------|-----------|-----------|-----------|-----------|---|--------|
| 8188 | 2  | TTN     | 179421694 | 179421694 | c.T60992C | p.I20331T | 2 | AA     |
| 8188 | 2  | ANKZF1  | 220097027 | 220097027 | c.C307T   | p.R103C   | 6 | AAAAAA |
| 8188 | 2  | TTN     | 179397561 | 179397561 | c.G76586A | p.R25529H | 2 | AA     |
| 8188 | 5  | SH3RF2  | 145393364 | 145393364 | c.C799T   | p.R267C   | 3 | AAA    |
| 8188 | 2  | TTN     | 179623758 | 179623758 | c.G10118A | p.S3373N  | 2 | AA     |
| 8188 | 19 | ZNF568  | 37487866  | 37487866  | c.A1081T  | p.S361C   | 2 | AA     |
| 8188 | 2  | TTN     | 179634421 | 179634421 | c.A8749C  | p.T2917P  | 2 | AA     |
| 8188 | 11 | NUP160  | 47857253  | 47857253  | c.A1051G  | p.T351A   | 2 | AA     |
| 8188 | 6  | MUC22   | 30995786  | 30995786  | c.A2578G  | p.T860A   | 2 | AA     |
| 8188 | 2  | TTN     | 179629461 | 179629461 | c.G9643A  | p.V3215M  | 2 | AA     |
| 8188 | 3  | CSRNP1  | 39184959  | 39184959  | c.G1357A  | p.V453I   | 6 | AAAAAA |
| 8188 | 8  | TRMT12  | 125463250 | 125463250 | c.T82C    | p.W28R    | 3 | AAA    |
| 8191 | 17 | HDAC5   | 42164885  | 42164885  | c.C1782G  | p.D594E   | 5 | AAAAA  |
| 8191 | 12 | RAD9B   | 110960196 | 110960196 | c.G898A   | p.G300R   | 2 | AA     |
| 8191 | 15 | ZNF106  | 42758294  | 42758294  | c.C73T    | p.R25W    | 4 | AAAA   |
| 8191 | X  | GPC3    | 132833929 | 132833929 | c.G998A   | p.R333Q   | 3 | AAA    |
| 8191 | X  | DMD     | 32632562  | 32632562  | c.G1316A  | p.R439K   | 3 | AAA    |
| 8191 | 5  | NSD1    | 176637576 | 176637576 | c.T2176C  | p.S726P   | 2 | AA     |
| 8191 | X  | TENM1   | 123630915 | 123630915 | c.G3646T  | p.V1216L  | 3 | AAA    |
| 8191 | 1  | AIM1L   | 26671248  | 26671248  | c.T1901C  | p.V634A   | 5 | AAAAA  |
| 8194 | 19 | ZNF419  | 58004346  | 58004346  | c.G286C   | p.E96Q    | 3 | AAA    |
| 8194 | 10 | KIF20B  | 91497912  | 91497912  | c.A3314G  | p.K1105R  | 3 | AAA    |
| 8194 | 4  | ZGRF1   | 113540718 | 113540718 | c.G480C   | p.L160F   | 3 | AAA    |
| 8194 | 4  | FREM3   | 144617606 | 144617606 | c.A4223T  | p.N1408I  | 3 | AAA    |
| 8194 | X  | P2RY4   | 69478942  | 69478942  | c.A533C   | p.N178T   | 3 | AAA    |
| 8194 | 16 | GRIN2A  | 9857958   | 9857958   | c.C3443T  | p.P1148L  | 3 | AAA    |
| 8194 | 4  | TET2    | 106156909 | 106156909 | c.C1810T  | p.Q604X   | 3 | AAA    |
| 8194 | 6  | HLA-A   | 29910693  | 29910693  | c.A233G   | p.Q78R    | 4 | AAAA   |
| 8194 | 4  | DKK2    | 107845794 | 107845794 | c.G437A   | p.R146Q   | 3 | AAA    |
| 8194 | 19 | ZNF264  | 57723007  | 57723007  | c.G542C   | p.R181T   | 3 | AAA    |
| 8194 | 19 | ZNF264  | 57723013  | 57723013  | c.G548A   | p.R183H   | 3 | AAA    |
| 8194 | 19 | VN1R1   | 57967133  | 57967133  | c.C722T   | p.S241F   | 3 | AAA    |
| 8194 | 18 | MEP1B   | 29793211  | 29793211  | c.C1268T  | p.S423L   | 3 | AAA    |
| 8194 | 10 | COL17A1 | 105824333 | 105824333 | c.C629T   | p.T210M   | 3 | AAA    |
| 8198 | X  | MXRA5   | 3240343   | 3240343   | c.C3383T  | p.A1128V  | 2 | AA     |
| 8198 | 11 | CHID1   | 870446    | 870446    | c.C920T   | p.A307V   | 1 | A      |
| 8198 | 7  | OR2AE1  | 99474427  | 99474427  | c.T230C   | p.I77T    | 2 | AA     |
| 8198 | 4  | LCORL   | 17885365  | 17885365  | c.A1787G  | p.K596R   | 2 | AA     |
| 8198 | 15 | AKAP13  | 86122654  | 86122654  | c.T1355C  | p.M452T   | 4 | AAAA   |
| 8198 | 3  | MYH15   | 108159977 | 108159977 | c.C2846T  | p.T949I   | 3 | AAA    |
| 8198 | 15 | AKAP13  | 86123988  | 86123988  | c.G2689A  | p.V897M   | 4 | AAAA   |
| 8199 | 16 | HS3ST6  | 1961674   | 1961674   | c.C946G   | p.L316V   | 3 | AAA    |
| 8199 | X  | REPS2   | 17153504  | 17153504  | c.A1780G  | p.M594V   | 2 | AA     |
| 8199 | X  | ATRX    | 76953110  | 76953110  | c.C203T   | p.S68L    | 3 | AAA    |
| 8208 | 1  | BTBD19  | 45275892  | 45275892  | c.T94C    | p.C32R    | 2 | AA     |
| 8208 | 20 | MYT1    | 62839425  | 62839425  | c.G876T   | p.E292D   | 2 | AA     |
| 8208 | X  | DCAF8L1 | 27998800  | 27998800  | c.T652G   | p.L218V   | 3 | AAA    |
| 8208 | X  | BEND2   | 18220008  | 18220008  | c.T960G   | p.N320K   | 3 | AAA    |

|      |    |         |           |           |          |          |   |         |
|------|----|---------|-----------|-----------|----------|----------|---|---------|
| 8208 | 14 | ADAM21  | 70924335  | 70924335  | c.C119T  | p.P40L   | 2 | AA      |
| 8208 | 10 | PDCD11  | 105184755 | 105184755 | c.C2778A | p.S926R  | 2 | AA      |
| 8210 | X  | MXRA5   | 3228144   | 3228144   | c.G8100C | p.E2700D | 3 | AAA     |
| 8210 | X  | RPS6KA6 | 83442896  | 83442896  | c.C12A   | p.F4L    | 4 | AAAA    |
| 8210 | 3  | FAM198A | 43074074  | 43074074  | c.T319A  | p.S107T  | 3 | AAA     |
| 8219 | 1  | NBPF12  | 146400170 | 146400170 | c.G646A  | p.G216S  | 4 | AAAA    |
| 8219 | 2  | STK25   | 242438696 | 242438696 | c.C561G  | p.I187M  | 5 | AAAAA   |
| 8219 | 12 | GYS2    | 21733432  | 21733432  | c.G147C  | p.Q49H   | 2 | AA      |
| 8221 | X  | TMEM47  | 34675139  | 34675139  | c.C8T    | p.S3L    | 3 | AAA     |
| 8751 | 3  | CELSR3  | 48699499  | 48699499  | c.A569T  | p.N190I  | 7 | AAAAAAA |
| 8751 | X  | BCYRN1  | 70444065  | 70444065  | c.G508T  | p.V170F  | 7 | AAAAAAA |
| 9616 | 9  | FAM166A | 140139794 | 140139794 | c.G487A  | p.A163T  | 2 | AA      |
| 9616 | 1  | NBPF20  | 145075705 | 145075705 | c.G158A  | p.R53H   | 2 | AA      |
| 9622 | 2  | KHK     | 27317406  | 27317406  | c.A271C  | p.T91P   | 2 | AA      |
| 9623 | 6  | SYNE1   | 152763329 | 152763329 | c.G3910A | p.A1304T | 2 | AA      |
| 9624 | 9  | PIP5KL1 | 130692077 | 130692077 | c.C118T  | p.R40C   | 5 | AAAAA   |
| 9624 | 7  | KPNA7   | 98790650  | 98790650  | c.A628C  | p.T210P  | 4 | AAAA    |
| 9634 | X  | MAGED1  | 51638851  | 51638851  | c.C748T  | p.R250C  | 2 | AA      |
| 9634 | 4  | MUC7    | 71347185  | 71347185  | c.T724C  | p.S242P  | 1 | A       |
| 9638 | 6  | MYO6    | 76566846  | 76566846  | c.C1256T | p.A419V  | 1 | A       |
| 9638 | 7  | FZD1    | 90895963  | 90895963  | c.G1768A | p.A590T  | 1 | A       |
| 9638 | 7  | PUS7    | 105108822 | 105108822 | c.G1487T | p.G496V  | 1 | A       |
| 9638 | 9  | TRPM6   | 77377716  | 77377716  | c.C3856A | p.H1286N | 1 | A       |
| 9638 | 10 | ZNF33B  | 43089179  | 43089179  | c.C1219A | p.H407N  | 1 | A       |
| 9638 | 7  | SLC26A4 | 107335127 | 107335127 | c.T1403C | p.I468T  | 1 | A       |
| 9638 | 4  | NKX6-1  | 85414591  | 85414591  | c.A955G  | p.N319D  | 1 | A       |
| 9638 | 2  | ORC4    | 148716428 | 148716428 | c.A11G   | p.N4S    | 1 | A       |
| 9638 | 9  | LINGO2  | 27949105  | 27949105  | c.A1565G | p.N522S  | 1 | A       |
| 9638 | 17 | MYHAS   | 10346774  | 10346774  | c.G5738A | p.R1913Q | 1 | A       |
| 9638 | 8  | GEM     | 95262720  | 95262720  | c.C709T  | p.R237X  | 1 | A       |
| 9638 | 8  | KLHL38  | 124665039 | 124665039 | c.G128T  | p.R43L   | 1 | A       |
| 9638 | 10 | ITGA8   | 15590522  | 15590522  | c.C2767T | p.R923X  | 1 | A       |
| 9638 | 4  | ENAM    | 71510366  | 71510366  | c.A3223T | p.S1075C | 1 | A       |
| 9638 | 13 | GPC6    | 94482467  | 94482467  | c.C380A  | p.T127N  | 1 | A       |
| 9638 | 18 | ESCO1   | 19154143  | 19154143  | c.C662T  | p.T221M  | 1 | A       |
| 9638 | 4  | FAM184B | 17710691  | 17710691  | c.G718A  | p.V240M  | 1 | A       |

\*Based on NCBI human reference genome GRC Build 37 (hg19).
